# Supplementary material for: Cross-species regulatory sequence activity prediction
Source: PLoS Comput Biol. 2020 Jul 20;16(7):e1008050. doi: 10.1371/journal.pcbi.1008050 (PMC7392335; doi:10.1371/journal.pcbi.1008050)
Supplement: S2 Table — (XLSX) [file pcbi.1008050.s020.xlsx]

## Sheet: An mouse
	pro_mean	sib_mean	diff_mean	pro_geo	sib_geo	diff_geo	mw_p	mw_q	ks_p	ks_q	auroc	target_id	target_labels
1302	1.15451	1.06095	0.093562	0.490993	0.476648	0.0143445	4.93466e-06	0.00312028	3.36495e-05	0.0138215	0.508049	CNhs10481	CAGE:urinary bladder, adult
1513	1.23234	1.13004	0.102294	0.509345	0.490309	0.0190354	6.58087e-06	0.00312028	8.24409e-05	0.0169313	0.507935	CNhs11929	CAGE:Inner ear stem cells, 1st generation stem cells, pool1
1332	0.822521	0.749174	0.073347	0.374232	0.358229	0.0160031	7.54407e-06	0.00312028	0.000260658	0.0225401	0.50788	CNhs10514	CAGE:whole body, embryo E16
1410	0.854338	0.776907	0.077431	0.410054	0.393354	0.0167002	9.68154e-06	0.00312028	0.000192109	0.0187736	0.507779	CNhs11033	CAGE:testis, embryo E16
1511	1.38348	1.27881	0.10467	0.515079	0.495115	0.0199637	1.72308e-05	0.00312028	0.00136927	0.0452828	0.507542	CNhs11915	CAGE:Astrocytes,
1482	1.72287	1.55167	0.171197	0.655977	0.63476	0.0212169	1.85555e-05	0.00312028	0.000160564	0.0187736	0.507511	CNhs11199	CAGE:epididymis and seminiferous tubule, neonate N30
1525	0.519956	0.483583	0.0363732	0.278881	0.268856	0.0100247	2.2289e-05	0.00312028	0.000285469	0.0234512	0.507434	CNhs12189	CAGE:Inner ear stem cells, differentiation, day03, pool1
1316	1.40421	1.28705	0.117159	0.549111	0.53285	0.0162608	2.2553e-05	0.00312028	2.92216e-05	0.0138215	0.507429	CNhs10497	CAGE:uterus, adult pregnant day19
1366	0.705525	0.647928	0.0575973	0.304071	0.289667	0.0144033	2.26191e-05	0.00312028	0.00118392	0.042977	0.507428	CNhs10599	CAGE:pancreas, embryo E17
1333	0.965475	0.876498	0.0889771	0.420175	0.40341	0.0167651	2.29971e-05	0.00312028	0.000238931	0.0218091	0.507421	CNhs10515	CAGE:whole body, neonate N06
1339	0.725647	0.6671	0.0585474	0.351889	0.337136	0.0147526	2.36763e-05	0.00312028	0.000595544	0.0297457	0.507408	CNhs10521	CAGE:eyeball, embryo E14
1411	0.877835	0.796964	0.0808706	0.39516	0.378134	0.0170263	2.51096e-05	0.00312028	0.00293183	0.0512446	0.507383	CNhs11034	CAGE:testis, embryo E15
1313	0.774385	0.733196	0.0411885	0.424239	0.411483	0.0127566	2.53087e-05	0.00312028	0.000113273	0.0176965	0.50738	CNhs10493	CAGE:pituitary gland, adult
1310	1.38671	1.30309	0.0836178	0.60969	0.592105	0.0175853	2.7576e-05	0.00312028	3.00322e-05	0.0138215	0.507343	CNhs10490	CAGE:epididymis, adult
1360	0.922638	0.845817	0.0768216	0.420655	0.405024	0.0156313	2.98799e-05	0.00312028	0.00033649	0.0240371	0.507309	CNhs10593	CAGE:eyeball, embryo E15
1415	0.988679	0.900968	0.087711	0.452387	0.433999	0.0183882	3.14277e-05	0.00312028	0.0001702	0.0187736	0.507287	CNhs11038	CAGE:adrenal gland, embryo E14
1473	0.729957	0.685193	0.0447634	0.375047	0.361612	0.0134347	3.22853e-05	0.00312028	0.000181894	0.0187736	0.507275	CNhs11190	CAGE:pituitary gland, neonate N00
1409	0.96277	0.874098	0.0886719	0.430996	0.413755	0.0172408	3.90728e-05	0.00356648	0.00120919	0.042977	0.507193	CNhs11031	CAGE:testis, embryo E13
1447	2.05882	1.90026	0.158555	0.776451	0.756865	0.0195864	6.02282e-05	0.00513492	9.32952e-05	0.0170316	0.507002	CNhs11119	CAGE:lung, neonate N25
1328	1.08998	1.00092	0.0890574	0.476392	0.463209	0.013183	6.25066e-05	0.00513492	4.20202e-06	0.00690392	0.506985	CNhs10509	CAGE:uterus, adult
1455	1.25184	1.15736	0.0944834	0.538106	0.520638	0.0174679	7.01631e-05	0.00527837	0.000597449	0.0297457	0.506933	CNhs11129	CAGE:muscle (biceps femoris), neonate N30
1337	0.681246	0.613513	0.0677326	0.309506	0.295179	0.0143263	7.37674e-05	0.00527837	0.00112307	0.0429117	0.506911	CNhs10519	CAGE:whole body, embryo E14
1628	1.93755	1.76499	0.172557	0.61071	0.591752	0.0189583	7.38908e-05	0.00527837	0.00015966	0.0187736	0.50691	CNhs14136	CAGE:macrophage, bone marrow derived
1558	1.56619	1.45185	0.114339	0.560362	0.544142	0.0162201	7.86452e-05	0.00535197	0.000530495	0.0290535	0.506882	CNhs12956	CAGE:cerebellum, embryo E11, biol_ (E11R1)
1437	2.31191	2.14095	0.170957	0.83521	0.815579	0.0196307	8.14359e-05	0.00535197	0.000118479	0.0176965	0.506866	CNhs11109	CAGE:lung, neonate N20
1407	1.35672	1.24295	0.113775	0.570042	0.550501	0.0195407	9.0521e-05	0.00540103	0.000721842	0.0338853	0.506818	CNhs11029	CAGE:testis, embryo E17
1293	0.780059	0.693556	0.0865023	0.334886	0.323223	0.0116629	9.1915e-05	0.00540103	0.00109861	0.0429117	0.506811	CNhs10471	CAGE:thymus, adult
1532	1.88106	1.75503	0.126029	0.724638	0.703306	0.0213314	9.20443e-05	0.00540103	0.000431933	0.0262839	0.50681	CNhs12532	CAGE:Sox2+ Supporting cells - organ of corti, pool1
1540	1.09988	1.01813	0.0817555	0.448122	0.434646	0.0134759	0.000105668	0.00598666	0.00115028	0.0429524	0.506747	CNhs12544	CAGE:Inner ear stem cells, 4th generation stem cells, pool1
1526	1.02145	0.942131	0.079316	0.445848	0.430629	0.0152182	0.00011456	0.00627407	0.00037683	0.0257972	0.506709	CNhs12190	CAGE:Inner ear stem cells, differentiation, day10, pool1
1375	2.00439	1.88075	0.123636	0.696953	0.675086	0.0218672	0.000127497	0.00663931	0.00364327	0.0544171	0.50666	CNhs10611	CAGE:SABiosciences XpressRef Mouse Universal Total RNA, pool1
1336	1.00463	0.915573	0.0890558	0.437566	0.422097	0.0154692	0.000132312	0.00663931	0.00215885	0.046868	0.506642	CNhs10518	CAGE:whole body, neonate N10
1486	1.80473	1.68176	0.122966	0.672371	0.655983	0.0163875	0.000133352	0.00663931	6.45853e-05	0.0169313	0.506639	CNhs11203	CAGE:kidney, neonate N30
1376	3.21225	3.0525	0.159752	0.924766	0.900833	0.0239328	0.000148708	0.0071861	0.00219649	0.046868	0.506587	CNhs10613	CAGE:Universal RNA - Mouse Normal Tissues Biochain, pool1
1346	0.722496	0.652968	0.0695273	0.32131	0.305411	0.0158997	0.000153978	0.00722323	0.00311931	0.0515606	0.506571	CNhs10577	CAGE:forelimb, embryo E14
1494	1.57043	1.43773	0.132702	0.621933	0.606613	0.0153203	0.000163163	0.00722323	0.000516283	0.0290535	0.506543	CNhs11212	CAGE:lung, neonate N06
1292	0.815094	0.76189	0.0532042	0.382932	0.371796	0.0111358	0.000163371	0.00722323	0.00435023	0.0604031	0.506543	CNhs10470	CAGE:prostate, adult
1319	1.33346	1.22798	0.105485	0.563744	0.548584	0.0151607	0.000167062	0.00722323	0.00166463	0.046868	0.506532	CNhs10500	CAGE:oviduct, adult pregnant day01
1317	1.97937	1.85261	0.126754	0.703713	0.687072	0.016641	0.000183541	0.00773227	0.000194249	0.0187736	0.506487	CNhs10498	CAGE:aorta, adult
1420	1.00962	0.933637	0.0759866	0.472419	0.456538	0.0158808	0.000189608	0.00778815	0.00109591	0.0429117	0.506472	CNhs11043	CAGE:adrenal gland, embryo E17
1294	0.920607	0.841798	0.0788091	0.416381	0.403409	0.0129718	0.000203126	0.00813991	0.000769487	0.0351185	0.506439	CNhs10472	CAGE:placenta, adult pregnant day10
1424	0.511479	0.475033	0.0364458	0.23442	0.224912	0.00950813	0.000229281	0.00896927	0.00353037	0.0544171	0.50638	CNhs11094	CAGE:pancreas, neonate N25
1459	2.35237	2.1764	0.175967	0.828097	0.808116	0.0199811	0.000266704	0.0101906	7.73195e-05	0.0169313	0.506307	CNhs11133	CAGE:lung, neonate N30
1396	1.04633	0.957532	0.088802	0.465699	0.449614	0.0160855	0.00027747	0.010361	0.00231753	0.0473111	0.506287	CNhs11017	CAGE:heart, embryo E15
1488	2.09079	1.95271	0.13808	0.804739	0.783496	0.0212423	0.00029301	0.0106981	0.00233244	0.0473111	0.50626	CNhs11205	CAGE:eyeball, neonate N02
1373	0.726746	0.665195	0.0615513	0.312094	0.297391	0.0147025	0.000324431	0.0111815	0.00320096	0.0515606	0.50621	CNhs10606	CAGE:kidney, embryo E14
1432	0.91208	0.838438	0.0736427	0.424928	0.412589	0.0123393	0.000325169	0.0111815	0.00199132	0.046868	0.506209	CNhs11104	CAGE:stomach, neonate N25
1465	0.782693	0.718568	0.0641253	0.361424	0.348279	0.0131451	0.000328895	0.0111815	0.00316676	0.0515606	0.506203	CNhs11139	CAGE:pancreas, neonate N02
1327	1.90281	1.78156	0.121242	0.725862	0.706446	0.0194157	0.000345995	0.0111815	0.00047505	0.0278753	0.506178	CNhs10508	CAGE:adrenal gland, adult
1349	0.733636	0.671741	0.0618947	0.322457	0.309908	0.0125486	0.000346221	0.0111815	0.00259049	0.0489861	0.506178	CNhs10580	CAGE:pancreas, embryo E18
1506	0.937885	0.840539	0.097346	0.45212	0.437695	0.0144249	0.000350924	0.0111815	0.00212665	0.046868	0.506171	CNhs11225	CAGE:bone (os femoris), neonate N16
1489	2.58092	2.39837	0.182558	0.863882	0.846269	0.0176123	0.000360396	0.0111815	0.00170931	0.046868	0.506158	CNhs11206	CAGE:kidney, neonate N10
1296	1.74808	1.60777	0.140311	0.658216	0.640238	0.0179779	0.000362296	0.0111815	0.000862589	0.0372956	0.506155	CNhs10474	CAGE:lung, adult
1364	0.746896	0.681131	0.0657644	0.344822	0.330761	0.0140612	0.000367498	0.0111815	0.00084488	0.0372956	0.506148	CNhs10597	CAGE:heart, embryo E14
1315	0.82936	0.770009	0.0593502	0.353016	0.342203	0.010813	0.000393073	0.0111828	0.00449673	0.061226	0.506114	CNhs10496	CAGE:intestine, adult
1425	1.04706	0.952839	0.0942194	0.441004	0.427389	0.013615	0.000394777	0.0111828	0.00191878	0.046868	0.506112	CNhs11095	CAGE:intestine, neonate N07
1464	0.77487	0.712522	0.0623479	0.367548	0.354919	0.0126292	0.000413516	0.0111828	0.00207002	0.046868	0.506088	CNhs11138	CAGE:pancreas, neonate N01
1417	0.946764	0.861687	0.0850767	0.408091	0.391221	0.0168693	0.000416544	0.0111828	0.00788299	0.0846519	0.506085	CNhs11040	CAGE:ovary, embryo E18
1383	0.897821	0.827784	0.0700365	0.439092	0.42276	0.0163329	0.00042096	0.0111828	0.0016426	0.046868	0.506079	CNhs11004	CAGE:adrenal gland, embryo E16
1355	0.703043	0.636713	0.06633	0.320847	0.306473	0.0143744	0.000422725	0.0111828	0.00217276	0.046868	0.506077	CNhs10586	CAGE:heart, embryo E11
1334	0.828942	0.756308	0.0726345	0.385764	0.3717	0.0140631	0.000439419	0.0111828	0.00144726	0.0466245	0.506058	CNhs10516	CAGE:whole body, embryo E18
1348	0.912951	0.83292	0.080031	0.382506	0.368204	0.0143016	0.000444301	0.0111828	0.00126726	0.0433771	0.506052	CNhs10579	CAGE:liver, embryo E18
1533	1.56052	1.45886	0.101654	0.633223	0.615616	0.0176074	0.000450635	0.0111828	0.00450903	0.061226	0.506045	CNhs12533	CAGE:Atoh1+ Inner ear hair cells - organ of corti, pool1
1288	1.46611	1.40828	0.0578334	0.501013	0.48689	0.0141231	0.000451871	0.0111828	0.0017688	0.046868	0.506044	CNhs10466	CAGE:liver, adult pregnant day01
1359	0.885028	0.820581	0.0644472	0.408477	0.394784	0.0136927	0.000463001	0.0111828	0.00173485	0.046868	0.506031	CNhs10592	CAGE:pituitary gland, embryo E15
1431	1.15956	1.09272	0.0668453	0.45398	0.439174	0.0148056	0.000474111	0.0111828	0.00811548	0.0853251	0.506019	CNhs11103	CAGE:liver, neonate N07
1331	0.918817	0.833623	0.0851941	0.412442	0.396902	0.0155399	0.000481361	0.0111828	0.00377913	0.0549479	0.506011	CNhs10513	CAGE:whole body, embryo E17.5
1382	1.07968	0.984594	0.0950878	0.459293	0.442966	0.0163271	0.000490449	0.0111828	0.00484285	0.0631492	0.506002	CNhs11003	CAGE:pancreas, embryo E16
1404	1.92304	1.78862	0.13442	0.754937	0.733343	0.0215946	0.000493031	0.0111828	0.000404962	0.0262839	0.505999	CNhs11026	CAGE:adrenal gland, embryo E18
1502	1.19233	1.09427	0.098061	0.512576	0.496783	0.015793	0.000498772	0.0111828	0.0021368	0.046868	0.505993	CNhs11221	CAGE:heart, neonate N03
1325	1.00693	0.941124	0.0658023	0.417216	0.406593	0.0106229	0.000499743	0.0111828	0.0107881	0.0995776	0.505992	CNhs10506	CAGE:intestinal mucosa, adult
1322	0.630739	0.592348	0.0383906	0.338292	0.32593	0.0123622	0.000507092	0.0111828	0.00813212	0.0853251	0.505985	CNhs10503	CAGE:stomach, adult
1393	1.30595	1.19815	0.107799	0.501625	0.485648	0.0159778	0.000508921	0.0111828	0.00198622	0.046868	0.505983	CNhs11014	CAGE:whole body, embryo E11
1510	1.10253	1.00603	0.0965074	0.439157	0.424724	0.0144329	0.000510104	0.0111828	0.00469166	0.0620002	0.505982	CNhs11297	CAGE:Mouse Aortic Smooth Muscle cells,
1460	1.62099	1.49706	0.123931	0.622129	0.607994	0.0141349	0.000516347	0.0111828	0.00518818	0.0660789	0.505975	CNhs11134	CAGE:stomach, neonate N30
1468	0.507217	0.468882	0.0383348	0.231962	0.222628	0.00933363	0.000517282	0.0111828	0.00759777	0.0826698	0.505974	CNhs11182	CAGE:pancreas, neonate N30
1476	1.60216	1.46164	0.140521	0.644992	0.628776	0.0162157	0.000530475	0.0112422	0.000552648	0.0292903	0.505961	CNhs11193	CAGE:stomach, neonate N03
1286	1.08083	1.0006	0.0802346	0.467359	0.45444	0.0129184	0.000533713	0.0112422	0.00256596	0.0489861	0.505958	CNhs10464	CAGE:placenta, adult pregnant day17
1305	1.65858	1.5461	0.11248	0.692129	0.672579	0.0195501	0.000573279	0.0116457	0.00207976	0.046868	0.505921	CNhs10484	CAGE:eyeball, adult
1344	0.931346	0.845783	0.0855627	0.389604	0.375663	0.0139408	0.000578229	0.0116457	0.0043749	0.0604031	0.505917	CNhs10526	CAGE:intestine, embryo E18
1352	0.956804	0.875556	0.0812484	0.434412	0.422905	0.0115067	0.000578613	0.0116457	0.0006304	0.0304632	0.505917	CNhs10583	CAGE:lung, embryo E18
1423	0.971796	0.887156	0.0846394	0.394354	0.378511	0.0158431	0.00058986	0.0116457	0.00279839	0.0499756	0.505907	CNhs11093	CAGE:mouse fibroblast cell line: CRL-1658 NIH/3T3
1357	0.82017	0.74542	0.0747505	0.348254	0.333629	0.0146252	0.000596768	0.0116457	0.012133	0.102228	0.505901	CNhs10588	CAGE:stomach, embryo E12
1335	0.818407	0.760882	0.0575251	0.390075	0.375692	0.0143821	0.000598156	0.0116457	0.0036141	0.0544171	0.505899	CNhs10517	CAGE:whole body, embryo E17
1481	1.91939	1.82716	0.0922216	0.604423	0.587327	0.0170968	0.000607491	0.0116457	0.00277423	0.0499756	0.505891	CNhs11198	CAGE:liver, neonate N25
1350	0.883093	0.784121	0.0989723	0.366074	0.354299	0.0117747	0.000609573	0.0116457	0.00740677	0.082403	0.50589	CNhs10581	CAGE:thymus, embryo E17
1306	0.443615	0.414653	0.0289617	0.209325	0.200693	0.00863212	0.000627243	0.011793	0.0142655	0.110636	0.505875	CNhs10486	CAGE:pancreas, adult
1608	1.28123	1.18371	0.0975283	0.465524	0.452521	0.0130033	0.000631641	0.011793	0.00746936	0.082403	0.505871	CNhs13211	CAGE:Follicle Associated Epithelium, pool2
1601	0.629264	0.598012	0.0312527	0.293827	0.284249	0.00957721	0.000648416	0.0119702	0.00151903	0.046868	0.505857	CNhs13196	CAGE:Mouse hepatic Stellate Cells (lipocyte),
1379	0.999552	0.905842	0.09371	0.458318	0.444975	0.0133425	0.000663143	0.012106	0.000300674	0.0235242	0.505846	CNhs10999	CAGE:stomach, embryo E18
1443	1.35895	1.29051	0.068439	0.516981	0.502196	0.0147852	0.00068025	0.0122534	0.00889012	0.0886178	0.505832	CNhs11115	CAGE:liver, neonate N10
1416	1.23676	1.15628	0.0804791	0.568646	0.55224	0.0164058	0.000693217	0.0122534	0.000422184	0.0262839	0.505822	CNhs11039	CAGE:pituitary gland, embryo E17
1358	0.873689	0.79925	0.0744383	0.382448	0.366841	0.0156069	0.000693591	0.0122534	0.0138271	0.10922	0.505822	CNhs10589	CAGE:forelimb, embryo E13
1564	0.497074	0.466346	0.0307278	0.269654	0.259973	0.00968161	0.000715281	0.0123818	0.00746919	0.082403	0.505806	CNhs12963	CAGE:cerebellum, neonate N00, biol_ (P0R1)
1008	1.9396	1.83848	0.10112	0.718962	0.701759	0.0172027	0.000715926	0.0123818	0.00889953	0.0886178	0.505805	ENCFF596BHZ	CHIP:H3K27ac:C57BL/6 embryonic facial prominence embryo (12.5 days)
1516	2.49928	2.34969	0.149593	0.792909	0.770515	0.0223939	0.00072883	0.0123996	0.0080311	0.0853251	0.505796	CNhs12106	CAGE:Mouse Astrocytes - hippocampus,
1422	3.39628	3.14351	0.252776	0.917068	0.895301	0.0217667	0.00073205	0.0123996	0.00537402	0.0674009	0.505794	CNhs11056	CAGE:Mouse Aortic Smooth Muscle cells - differentiated, biol_
1508	1.19632	1.08503	0.11129	0.51357	0.496406	0.0171638	0.000749103	0.0125589	0.00374759	0.0549479	0.505782	CNhs11227	CAGE:bone (os femoris), neonate N02
1291	0.530892	0.504476	0.0264161	0.316981	0.306625	0.0103557	0.000768051	0.0126374	0.0111253	0.101121	0.505768	CNhs10469	CAGE:submandibular gland, adult
1392	1.11294	1.01448	0.09846	0.479547	0.462147	0.0174003	0.000778774	0.0126374	0.000887713	0.0373978	0.505761	CNhs11013	CAGE:heart, embryo E13
1449	1.74494	1.62927	0.115665	0.703361	0.687931	0.01543	0.000781157	0.0126374	0.000319886	0.0238897	0.505759	CNhs11122	CAGE:kidney, neonate N25
963	2.49391	2.35024	0.143671	0.82057	0.800227	0.0203431	0.000786384	0.0126374	0.0070345	0.0808388	0.505756	ENCFF008XYM	CHIP:H3K27ac:C57BL/6 limb embryo (12.5 days)
1311	0.492485	0.459704	0.032781	0.282648	0.273882	0.00876585	0.000801354	0.0126374	0.00163248	0.046868	0.505746	CNhs10491	CAGE:vesicular gland, adult
1561	1.58173	1.49176	0.089965	0.592183	0.57576	0.0164236	0.000802463	0.0126374	0.00202673	0.046868	0.505745	CNhs12960	CAGE:cerebellum, embryo E14, biol_ (E14R1)
1405	1.41174	1.30285	0.108888	0.635866	0.618379	0.0174875	0.000807626	0.0126374	0.00684079	0.0797122	0.505742	CNhs11027	CAGE:testis, embryo E18
1412	0.755376	0.670094	0.085282	0.336573	0.321921	0.0146515	0.000840028	0.0130057	0.0056416	0.0681555	0.505721	CNhs11035	CAGE:spleen, embryo E16
1500	1.60038	1.47576	0.124622	0.655269	0.640212	0.0150569	0.000848419	0.0130057	0.00250718	0.0489861	0.505715	CNhs11219	CAGE:lung, neonate N10
1441	1.6436	1.52988	0.113726	0.666695	0.651615	0.0150794	0.00085491	0.0130057	6.68452e-05	0.0169313	0.505711	CNhs11113	CAGE:kidney, neonate N20
1505	1.42073	1.30827	0.11246	0.607092	0.592569	0.0145224	0.000868268	0.0130877	0.00210985	0.046868	0.505703	CNhs11224	CAGE:lung, neonate N00
1326	1.42621	1.32418	0.102035	0.589028	0.574825	0.0142034	0.000888443	0.0131717	0.00277672	0.0499756	0.505691	CNhs10507	CAGE:ovary, adult
1290	1.01383	0.936876	0.0769505	0.423627	0.411066	0.0125618	0.000898288	0.0131717	0.0102092	0.0958495	0.505685	CNhs10468	CAGE:colon, adult
1501	1.60666	1.53385	0.0728017	0.55495	0.540743	0.0142068	0.000903788	0.0131717	0.00299503	0.0512586	0.505682	CNhs11220	CAGE:liver, neonate N20
1493	2.3592	2.11508	0.244121	0.723447	0.706761	0.0166856	0.000912631	0.0131717	0.00303163	0.0513502	0.505676	CNhs11211	CAGE:thymus, neonate N07
1372	1.07973	0.984227	0.0954986	0.46565	0.454477	0.0111735	0.000914882	0.0131717	0.00232702	0.0473111	0.505675	CNhs10605	CAGE:lung, embryo E17
1362	0.885322	0.782826	0.102497	0.374132	0.361755	0.0123774	0.000929435	0.0131717	0.0050932	0.065376	0.505667	CNhs10595	CAGE:thymus, embryo E18
1400	1.47051	1.3535	0.117013	0.612485	0.595306	0.0171786	0.000936678	0.0131717	0.00259391	0.0489861	0.505662	CNhs11021	CAGE:heart, embryo E16
1474	2.10601	1.9579	0.14811	0.80602	0.78629	0.0197293	0.00093797	0.0131717	0.00137805	0.0452828	0.505662	CNhs11191	CAGE:adrenal gland, neonate N00
1046	1.78772	1.68572	0.101996	0.682326	0.664207	0.0181193	0.000974526	0.013569	0.0190647	0.128903	0.505641	ENCFF897QOI	CHIP:H3K27ac:C57BL/6 limb embryo (11.5 days)
1524	0.846497	0.784012	0.0624856	0.339975	0.324752	0.0152233	0.00101461	0.0140084	0.0258915	0.156973	0.505619	CNhs12130	CAGE:Mouse Embryonic fibroblasts,
1363	0.644808	0.587538	0.0572695	0.287477	0.274196	0.0132811	0.00108051	0.0147797	0.0040219	0.0579647	0.505585	CNhs10596	CAGE:forelimb, embryo E11
1462	0.979215	0.904834	0.0743808	0.426436	0.41398	0.0124561	0.00108847	0.0147797	0.00272528	0.0499756	0.505581	CNhs11136	CAGE:pancreas, neonate N16
1387	1.00544	0.911657	0.0937831	0.434508	0.420306	0.0142014	0.00110526	0.0148847	0.00527625	0.0666837	0.505573	CNhs11008	CAGE:forelimb, embryo E18
1370	0.671443	0.605104	0.0663383	0.319742	0.307058	0.012684	0.00114443	0.0152869	0.00552373	0.0681555	0.505554	CNhs10603	CAGE:stomach, embryo E15
1512	1.5397	1.41469	0.125016	0.504851	0.491148	0.0137033	0.00126667	0.0167068	0.0201307	0.133366	0.505498	CNhs12202	CAGE:granulocyte macrophage progenitor GMP, biol_
1491	2.38474	2.22731	0.15743	0.785564	0.768466	0.0170984	0.00127106	0.0167068	0.00916604	0.0901785	0.505496	CNhs11209	CAGE:heart, neonate N16
1434	1.06888	1.02303	0.0458467	0.41606	0.404439	0.0116209	0.00129136	0.0167446	0.00817084	0.0853251	0.505487	CNhs11106	CAGE:liver, neonate N30
1298	1.24061	1.166	0.0746036	0.540715	0.526671	0.0140443	0.00130059	0.0167446	0.0120015	0.102099	0.505483	CNhs10476	CAGE:mammary gland, adult pregnant day19
1403	1.12101	1.03381	0.0871969	0.524072	0.508684	0.015388	0.00130451	0.0167446	0.0169711	0.121149	0.505482	CNhs11025	CAGE:heart, embryo E17
1356	0.45444	0.41464	0.0398001	0.233938	0.224037	0.00990139	0.00131669	0.0167699	0.00167715	0.046868	0.505477	CNhs10587	CAGE:whole body, embryo E12
1492	2.19676	2.00897	0.187796	0.74825	0.731063	0.0171867	0.00134296	0.0168468	0.0144911	0.111779	0.505466	CNhs11210	CAGE:stomach, neonate N07
1394	0.894163	0.81073	0.0834327	0.40906	0.39337	0.0156896	0.00134323	0.0168468	0.00410122	0.0585939	0.505466	CNhs11015	CAGE:heart, embryo E12
1636	0.209741	0.187286	0.0224546	0.114486	0.110175	0.00431067	0.00139006	0.0172612	0.00157301	0.046868	0.505447	CNhs14331	CAGE:natural helper cells, IL33 treated, day02, biol_, tech_rep2
999	2.00838	1.9186	0.0897743	0.723027	0.704829	0.0181977	0.00142355	0.0172612	0.0175839	0.12314	0.505433	ENCFF631JYQ	CHIP:H3K27ac:C57BL/6 hindbrain embryo (12.5 days)
1515	1.42493	1.33955	0.0853786	0.550456	0.533639	0.0168164	0.00142527	0.0172612	0.00209313	0.046868	0.505433	CNhs12076	CAGE:Mouse Astrocytes - cerebellar,
1629	1.08757	0.995544	0.0920272	0.437427	0.423552	0.0138758	0.00142815	0.0172612	0.00471699	0.0620002	0.505431	CNhs14137	CAGE:osteoclast, bone marrow derived
1457	1.22895	1.13627	0.0926811	0.499946	0.487672	0.0122735	0.0014317	0.0172612	0.00710232	0.0810355	0.50543	CNhs11131	CAGE:intestine, neonate N30
1560	1.54915	1.46819	0.0809619	0.59934	0.585174	0.0141655	0.00146709	0.0172612	0.01342	0.107556	0.505416	CNhs12958	CAGE:cerebellum, embryo E13, biol_ (E13R1)
851	1.56476	1.49796	0.0667955	0.636314	0.619545	0.0167686	0.00146747	0.0172612	0.00773375	0.0835957	0.505416	ENCFF422NJA	CHIP:H3K27ac:C57BL/6 neural tube embryo (11.5 days)
1475	1.21563	1.11019	0.105436	0.493234	0.479033	0.0142013	0.00147387	0.0172612	0.0149144	0.113974	0.505414	CNhs11192	CAGE:intestine, neonate N01
1308	1.15253	1.06543	0.0871072	0.489386	0.476498	0.012888	0.00147812	0.0172612	0.00266938	0.0498385	0.505412	CNhs10488	CAGE:amnion, adult pregnant day17.5
1408	0.756807	0.691506	0.0653012	0.359499	0.345606	0.013893	0.00148173	0.0172612	0.00238716	0.0478306	0.505411	CNhs11030	CAGE:heart, embryo E18
767	1.59164	1.51257	0.0790685	0.636206	0.619836	0.01637	0.00149184	0.0172612	0.00747295	0.082403	0.505407	ENCFF089IXS	CHIP:H3K27ac:C57BL/6 embryonic facial prominence embryo (11.5 days)
1433	0.827758	0.757437	0.0703214	0.373917	0.360972	0.0129445	0.00150247	0.0172627	0.00202477	0.046868	0.505403	CNhs11105	CAGE:pancreas, neonate N00
1351	0.718469	0.651418	0.0670511	0.331231	0.31914	0.0120901	0.00151541	0.0172904	0.00971503	0.0928012	0.505398	CNhs10582	CAGE:intestine, embryo E17
1479	1.27382	1.1791	0.0947245	0.53383	0.519594	0.0142356	0.00156378	0.0177192	0.0042346	0.0594653	0.505381	CNhs11196	CAGE:heart, neonate N25
1523	3.33941	3.09043	0.248976	0.922531	0.897795	0.0247358	0.0015957	0.017957	0.0137564	0.109188	0.505369	CNhs12507	CAGE:Mouse Schwann,
1395	1.35661	1.25297	0.103643	0.567964	0.551463	0.0165014	0.00162205	0.0181295	0.00563377	0.0681555	0.50536	CNhs11016	CAGE:eyeball, embryo E12
1529	2.25217	2.07155	0.180617	0.717707	0.699878	0.0178282	0.0016371	0.018174	0.00171602	0.046868	0.505355	CNhs12355	CAGE:Mouse Cardiac Myocytes,
1391	0.759499	0.690078	0.0694208	0.360729	0.346138	0.0145903	0.00165297	0.0182261	0.0033113	0.0525341	0.505349	CNhs11012	CAGE:pancreas, embryo E14
1450	1.29711	1.21311	0.0839951	0.499413	0.484797	0.0146161	0.00166586	0.0182261	0.0111399	0.101121	0.505345	CNhs11123	CAGE:liver, neonate N03
1343	0.936118	0.855376	0.080742	0.413624	0.399533	0.014091	0.00167507	0.0182261	0.00229452	0.0473111	0.505342	CNhs10525	CAGE:whole body, neonate N00
1614	1.57508	1.43933	0.135746	0.512539	0.49861	0.0139286	0.00170844	0.0183724	0.00878691	0.0885699	0.505331	CNhs13225	CAGE:CD4+CD25-CD44- naive conventional T cells, antiCD3_CD28 stimulation, 06hr, pool2 (Balb_cAJcl)
1340	0.73378	0.66491	0.0688697	0.317805	0.303457	0.0143473	0.00171088	0.0183724	0.0311083	0.171513	0.50533	CNhs10522	CAGE:lung, embryo E12
1621	1.00555	0.933964	0.0715834	0.377977	0.367063	0.010914	0.00175856	0.018729	0.0290739	0.167701	0.505314	CNhs13240	CAGE:GP2+ M cell, pool3
1604	0.95872	0.888385	0.0703355	0.387351	0.376192	0.0111591	0.00176688	0.018729	0.014777	0.113452	0.505312	CNhs13200	CAGE:Follicle Associated Epithelium, pool3
1469	2.18308	1.94946	0.233615	0.699361	0.681936	0.0174251	0.00179901	0.0188025	0.0173062	0.122034	0.505302	CNhs11186	CAGE:thymus, neonate N20
1440	1.46109	1.27151	0.189579	0.546672	0.532967	0.0137048	0.0018017	0.0188025	0.00590067	0.0697467	0.505301	CNhs11112	CAGE:spleen, neonate N20
1618	0.865609	0.801149	0.0644599	0.341849	0.331521	0.0103285	0.00182085	0.0188025	0.0132363	0.107028	0.505295	CNhs13232	CAGE:Ileum epithelium, pool2
1504	1.98857	1.86495	0.123624	0.740719	0.722057	0.0186616	0.00182445	0.0188025	0.0034374	0.0537871	0.505294	CNhs11223	CAGE:adrenal gland, neonate N25
1458	2.06601	1.85606	0.20995	0.66211	0.648388	0.0137216	0.00183104	0.0188025	0.0115852	0.102099	0.505291	CNhs11132	CAGE:thymus, neonate N30
1388	1.16824	1.08315	0.0850815	0.470501	0.452528	0.0179733	0.00187809	0.0190683	0.0247804	0.15257	0.505277	CNhs11009	CAGE:pituitary gland, embryo E13
1518	1.93995	1.86023	0.0797145	0.690353	0.674275	0.0160783	0.00188014	0.0190683	0.00837643	0.0854812	0.505276	CNhs12131	CAGE:Mouse Granule cells,
1485	1.68333	1.56262	0.120714	0.624697	0.609569	0.0151283	0.00190254	0.0191772	0.0164539	0.118569	0.50527	CNhs11202	CAGE:heart, neonate N30
1490	2.75508	2.58252	0.172559	0.945837	0.924337	0.0215	0.00194662	0.0195018	0.00829977	0.0854812	0.505256	CNhs11207	CAGE:eyeball, neonate N00
1539	1.21657	1.10786	0.10871	0.408581	0.398652	0.00992963	0.0019908	0.0198235	0.0160887	0.118569	0.505244	CNhs12543	CAGE:MC1+Gr1+ myeloid-derived suppressor cells control, (0128 PBS)
1472	1.69312	1.56384	0.129282	0.696794	0.679366	0.0174276	0.00200411	0.0198358	0.0120555	0.102099	0.50524	CNhs11189	CAGE:testis, neonate N00
1427	1.035	0.943537	0.0914591	0.441372	0.428563	0.0128089	0.00201671	0.019841	0.00283264	0.0500433	0.505236	CNhs11098	CAGE:intestine, neonate N10
1390	1.07715	0.953723	0.123432	0.462149	0.448435	0.0137138	0.00208042	0.0202664	0.00568857	0.0682213	0.505218	CNhs11011	CAGE:spleen, embryo E18
1384	1.5741	1.41231	0.16179	0.590971	0.57321	0.0177603	0.00209629	0.0202664	0.0161635	0.118569	0.505214	CNhs11005	CAGE:thymus, embryo E15
1480	1.77019	1.57316	0.197023	0.600325	0.585912	0.0144129	0.00209695	0.0202664	0.00911749	0.0901785	0.505214	CNhs11197	CAGE:thymus, neonate N06
1439	1.40542	1.29446	0.110959	0.607941	0.594115	0.0138263	0.00211788	0.020349	0.00102844	0.042243	0.505208	CNhs11111	CAGE:lung, neonate N07
1385	1.00038	0.909037	0.0913441	0.466215	0.453786	0.0124282	0.00221668	0.0210931	0.00332535	0.0525341	0.505182	CNhs11006	CAGE:stomach, embryo E17
1369	0.991184	0.895956	0.0952278	0.413165	0.399034	0.0141312	0.002221	0.0210931	0.00360887	0.0544171	0.50518	CNhs10602	CAGE:intestine, embryo E15
1419	0.518278	0.469689	0.0485888	0.269195	0.257329	0.0118665	0.00228359	0.0215629	0.0142757	0.110636	0.505164	CNhs11042	CAGE:pancreas, embryo E15
1498	1.07345	0.977404	0.0960417	0.465489	0.450349	0.0151395	0.00230611	0.0216511	0.00358344	0.0544171	0.505159	CNhs11217	CAGE:ovary, neonate N00
1448	1.26018	1.16696	0.0932293	0.5368	0.524331	0.0124695	0.00241267	0.0225228	0.019706	0.131613	0.505132	CNhs11121	CAGE:intestine, neonate N25
1463	1.33538	1.18963	0.14575	0.509688	0.496934	0.0127538	0.00244436	0.0226897	0.0153008	0.115849	0.505125	CNhs11137	CAGE:thymus, neonate N03
1495	1.74621	1.61611	0.130092	0.674567	0.658173	0.016394	0.0025003	0.0230786	0.0178981	0.123557	0.505111	CNhs11213	CAGE:heart, neonate N00
567	1.48951	1.43296	0.0565556	0.603609	0.588845	0.0147639	0.00252429	0.0231699	0.0310847	0.171513	0.505106	ENCFF230FQZ	CHIP:H3K27ac:C57BL/6 midbrain embryo (11.5 days)
1517	1.63168	1.52521	0.106464	0.603057	0.585516	0.0175417	0.00266488	0.024306	0.019541	0.131045	0.505074	CNhs12107	CAGE:Mouse Astrocytes,
1345	1.15332	1.05793	0.095396	0.48361	0.468532	0.0150786	0.00267766	0.024306	0.00210576	0.046868	0.505071	CNhs10576	CAGE:whole body, neonate N01
1453	0.659182	0.611267	0.0479144	0.336299	0.327167	0.00913152	0.00273021	0.0246469	0.0371936	0.190966	0.50506	CNhs11126	CAGE:intestine, neonate N00
1418	0.721201	0.645269	0.0759315	0.325306	0.311762	0.0135436	0.00278904	0.0250404	0.0151247	0.115046	0.505047	CNhs11041	CAGE:thymus, embryo E14
1527	0.771877	0.698596	0.0732806	0.295589	0.286382	0.00920695	0.00282451	0.025221	0.0187867	0.127548	0.505039	CNhs12198	CAGE:MC1+Gr1+ myeloid-derived suppressor cells cancer, (0127 3LL)
779	2.74537	2.5945	0.150873	0.852245	0.834163	0.0180821	0.0028865	0.0256353	0.0118873	0.102099	0.505027	ENCFF306YHS	CHIP:H3K27ac:C57BL/6 embryonic facial prominence embryo (13.5 days)
1442	0.977468	0.900324	0.0771446	0.446636	0.435122	0.0115149	0.0029465	0.0259015	0.0116206	0.102099	0.505014	CNhs11114	CAGE:small intestine, neonate N16
1430	0.934777	0.852197	0.0825806	0.426784	0.414522	0.0122619	0.00294801	0.0259015	0.00561939	0.0681555	0.505014	CNhs11102	CAGE:intestine, neonate N06
1347	0.692448	0.62148	0.070968	0.340376	0.326834	0.0135419	0.00296946	0.0259512	0.0140548	0.110489	0.50501	CNhs10578	CAGE:whole body, embryo E14.5
1413	1.10384	1.02568	0.0781666	0.51013	0.494093	0.0160365	0.00314448	0.0271946	0.00316827	0.0515606	0.504975	CNhs11036	CAGE:pituitary gland, embryo E16
1555	1.65502	1.55892	0.0960962	0.683549	0.667578	0.0159701	0.00314484	0.0271946	0.00421483	0.0594653	0.504975	CNhs12819	CAGE:cerebellum, neonate N06, biol_ (P6R1)
1329	0.95014	0.86099	0.0891497	0.388948	0.375259	0.0136889	0.00316713	0.027244	0.0125258	0.103381	0.504971	CNhs10510	CAGE:liver, embryo E17
1607	0.719685	0.666339	0.0533453	0.305127	0.295941	0.00918627	0.0031859	0.0272627	0.0530148	0.243987	0.504968	CNhs13210	CAGE:CD326++ enterocyte isolated from mice, treated with RANKL, day03, pool2
1466	1.98674	1.85932	0.127421	0.797485	0.779213	0.0182721	0.00327777	0.0279035	0.019524	0.131045	0.50495	CNhs11140	CAGE:eyeball, neonate N01
1467	1.51608	1.34964	0.166436	0.554565	0.540837	0.0137281	0.00331467	0.0280722	0.0124347	0.103381	0.504944	CNhs11181	CAGE:thymus, neonate N02
1402	1.49885	1.39072	0.108129	0.666928	0.649909	0.017019	0.00337557	0.0284413	0.00759427	0.0826698	0.504933	CNhs11023	CAGE:eyeball, embryo E17
77	0.294833	0.287929	0.00690401	0.185908	0.181975	0.00393228	0.003414	0.0286184	0.0037133	0.0549479	0.504926	ENCFF043UNG	DNASE:C57BL/6 lung embryo (14.5 days)
1289	0.27907	0.259242	0.019828	0.168547	0.162173	0.00637384	0.00343948	0.0286856	0.0113613	0.102004	0.504921	CNhs10467	CAGE:cecum, adult
881	1.26771	1.26308	0.00462902	0.583884	0.572021	0.0118632	0.00353867	0.0293638	0.0154876	0.116726	0.504904	ENCFF017FCI	CHIP:H3K9ac:C57BL/6 hindbrain embryo (12.5 days)
1478	0.638442	0.577108	0.0613336	0.362296	0.349658	0.0126383	0.00363038	0.0299734	0.00490216	0.0634193	0.504889	CNhs11195	CAGE:bone (os femoris), neonate N20
1477	2.12903	1.90966	0.219364	0.693547	0.678702	0.0148446	0.00381698	0.0313565	0.0308719	0.17136	0.504858	CNhs11194	CAGE:thymus, neonate N10
1011	2.49219	2.42798	0.064213	0.796421	0.776718	0.0197033	0.00384058	0.0313934	0.00122941	0.042977	0.504854	ENCFF266KHC	CHIP:H3K27ac:C57BL/6 forebrain embryo (10.5 days)
1563	1.08176	1.03094	0.0508171	0.511701	0.499888	0.0118135	0.00387172	0.0313962	0.0241305	0.151322	0.504849	CNhs12962	CAGE:cerebellum, embryo E18, biol_ (E18R1)
1451	1.18203	1.08072	0.101303	0.489139	0.476328	0.0128106	0.00389003	0.0313962	0.0244839	0.152375	0.504846	CNhs11124	CAGE:skin, neonate N00
1330	0.875678	0.796398	0.0792799	0.387187	0.372197	0.0149902	0.00389824	0.0313962	0.0124588	0.103381	0.504845	CNhs10512	CAGE:whole body, embryo E13
1499	1.75477	1.60581	0.14896	0.653827	0.636952	0.0168752	0.00397709	0.0317224	0.0109599	0.100598	0.504833	CNhs11218	CAGE:epididymis and seminiferous tubule, neonate N00
1452	2.20187	1.97227	0.229601	0.692333	0.677969	0.0143635	0.00397736	0.0317224	0.0239222	0.151322	0.504833	CNhs11125	CAGE:thymus, neonate N25
914	2.63764	2.52292	0.114722	0.890342	0.875208	0.0151343	0.00401213	0.0318241	0.0713686	0.291646	0.504827	ENCFF512TCI	CHIP:H3K27ac:C57BL/6 intestine postnatal (0 days)
1274	1.72747	1.69147	0.035998	0.503012	0.495808	0.00720361	0.00402891	0.0318241	0.00944642	0.0912969	0.504825	GSM874959	CHIP:H3K4me3:H3K4me3_ZT10 / H3K4me3 IP / .
1496	2.3699	2.20114	0.168761	0.83463	0.819353	0.0152768	0.00404823	0.0318241	0.00585697	0.0697319	0.504822	CNhs11214	CAGE:kidney, neonate N00
1622	0.839485	0.78032	0.0591649	0.326024	0.317009	0.00901541	0.00409627	0.0320484	0.0610986	0.263624	0.504815	CNhs13242	CAGE:CD326+ enterocyte isolated from mice, treated with RANKL, day03, pool1
1603	1.24139	1.15606	0.0853279	0.460004	0.448113	0.0118906	0.00417809	0.0325337	0.0160412	0.118569	0.504802	CNhs13199	CAGE:Ileum epithelium, pool1
1535	1.46488	1.33401	0.130867	0.459299	0.447809	0.0114897	0.00421386	0.032559	0.0403126	0.203171	0.504797	CNhs12539	CAGE:MC1+Gr1+ myeloid-derived suppressor cells cancer, (10,11,12 3LL)
1341	0.830521	0.740923	0.0895981	0.354419	0.342544	0.0118747	0.00425309	0.032559	0.03319	0.179971	0.504791	CNhs10523	CAGE:liver, embryo E16
1487	1.58736	1.47826	0.109096	0.671323	0.654684	0.016639	0.0042587	0.032559	0.0329884	0.17947	0.504791	CNhs11204	CAGE:testis, neonate N10
1428	0.849755	0.738293	0.111462	0.36925	0.359417	0.00983265	0.00426061	0.032559	0.00978676	0.092946	0.50479	CNhs11099	CAGE:spleen, neonate N25
1304	0.221744	0.201341	0.0204033	0.135829	0.128938	0.00689144	0.00436021	0.033117	0.0227434	0.145967	0.504776	CNhs10483	CAGE:bone (os femoris), adult
1444	1.13597	0.989482	0.146491	0.466471	0.45528	0.0111908	0.0043792	0.033117	0.00219643	0.046868	0.504773	CNhs11116	CAGE:spleen, neonate N10
1367	0.804428	0.737357	0.0670716	0.366292	0.352509	0.0137822	0.0043941	0.033117	0.0209979	0.137998	0.504771	CNhs10600	CAGE:forelimb, embryo E12
1538	1.03615	0.934034	0.102119	0.368813	0.357866	0.0109468	0.00444968	0.0333828	0.0465573	0.225645	0.504763	CNhs12542	CAGE:MC1+Gr1+ myeloid-derived suppressor cells cancer, (0128 3LL)
1386	0.860322	0.787321	0.0730016	0.422084	0.407487	0.0145967	0.00461687	0.0344796	0.0285804	0.167285	0.50474	CNhs11007	CAGE:forelimb, embryo E15
1559	1.47093	1.37478	0.0961556	0.549175	0.535564	0.0136108	0.00477172	0.0353459	0.0341817	0.182339	0.50472	CNhs12957	CAGE:cerebellum, embryo E12, biol_ (E12R1)
893	1.66522	1.59405	0.0711722	0.650045	0.638994	0.0110508	0.00477589	0.0353459	0.0238291	0.151322	0.504719	ENCFF803SVJ	CHIP:H3K27ac:C57BL/6 intestine embryo (15.5 days)
1312	1.20638	1.11056	0.0958284	0.507935	0.497735	0.0102	0.00481188	0.0354044	0.00703588	0.0808388	0.504715	CNhs10492	CAGE:skin, adult
1497	2.06253	1.87976	0.182766	0.692367	0.6767	0.0156667	0.00482689	0.0354044	0.0287124	0.167285	0.504713	CNhs11215	CAGE:skin, neonate N03
1600	1.77951	1.66377	0.11574	0.693992	0.675127	0.018865	0.00488891	0.0356999	0.0120261	0.102099	0.504705	CNhs13088	CAGE:neurospheres - enteric neuron derived, biol_
1381	1.33529	1.19562	0.139678	0.51854	0.504678	0.0138618	0.00491278	0.0357155	0.0363453	0.189433	0.504702	CNhs11002	CAGE:thymus, embryo E16
1401	1.58031	1.43755	0.14276	0.632999	0.617234	0.0157654	0.00517553	0.0374599	0.00835565	0.0854812	0.504669	CNhs11022	CAGE:stomach, embryo E16
1537	1.16593	1.06126	0.104665	0.396013	0.385955	0.0100579	0.00522912	0.0376818	0.0808228	0.311375	0.504662	CNhs12541	CAGE:MC1+Gr1+ myeloid-derived suppressor cells control, (0127 PBS)
595	1.85332	1.7708	0.0825154	0.681113	0.664167	0.0169464	0.00528459	0.037811	0.0233853	0.149502	0.504655	ENCFF177SVC	CHIP:H3K27ac:C57BL/6 hindbrain embryo (11.5 days)
848	2.12602	2.20126	-0.075232	0.642183	0.632938	0.00924516	0.00529308	0.037811	0.00719896	0.0815717	0.504654	ENCFF178JLS	CHIP:H3K4me3:C57BL/6 forebrain embryo (12.5 days)
1287	1.20065	1.05503	0.145624	0.457357	0.444177	0.0131792	0.00541916	0.038509	0.0430047	0.214111	0.50464	CNhs10465	CAGE:spleen, adult
1617	0.596102	0.552517	0.0435849	0.259694	0.251076	0.00861749	0.00543767	0.038509	0.0488018	0.233765	0.504637	CNhs13231	CAGE:GP2+ M cell, pool2
1620	0.954313	0.887025	0.0672879	0.36631	0.355717	0.0105936	0.00547001	0.0385718	0.0554838	0.248392	0.504634	CNhs13236	CAGE:CD326++ enterocyte isolated from mice, treated with RANKL, day03, pool1
1454	1.67367	1.56057	0.113098	0.627084	0.612833	0.0142514	0.00577115	0.0405213	0.0177627	0.12314	0.504599	CNhs11127	CAGE:heart, neonate N20
1086	1.96389	1.89247	0.0714272	0.710966	0.694061	0.0169051	0.00582201	0.0407045	0.0243367	0.152035	0.504594	ENCFF541IJI	CHIP:H3K27ac:C57BL/6 forebrain embryo (12.5 days)
1371	0.818313	0.738602	0.079711	0.356526	0.34302	0.013506	0.00589319	0.041019	0.0490552	0.234296	0.504586	CNhs10604	CAGE:lung, embryo E14
1576	1.45901	1.38602	0.0729992	0.651513	0.637562	0.0139519	0.00592723	0.041019	0.0257034	0.15641	0.504582	CNhs13011	CAGE:cerebellum, neonate N03, biol_ (P3R2)
1082	5.26101	4.92431	0.336699	1.30264	1.28584	0.0167973	0.00594189	0.041019	0.00820533	0.0853251	0.504581	ENCFF996XRG	CHIP:H3K36me3:C57BL/6 hindbrain embryo (10.5 days)
1552	3.02571	2.90269	0.123023	0.959605	0.941197	0.0184081	0.00640777	0.0438652	0.00455984	0.0614084	0.504532	CNhs12635	CAGE:Mouse Neurons - dorsal spinal cord,
1048	2.15064	2.02931	0.121333	0.755586	0.739615	0.0159712	0.00643694	0.0438652	0.0649183	0.274899	0.504529	ENCFF402FVP	CHIP:H3K27ac:C57BL/6 limb embryo (13.5 days)
1445	2.27827	2.12641	0.151858	0.741888	0.725977	0.0159115	0.00644129	0.0438652	0.0260685	0.157465	0.504529	CNhs11117	CAGE:liver, neonate N00
1507	1.65151	1.58636	0.065156	0.656769	0.644169	0.0126004	0.00646098	0.0438652	0.0214528	0.139652	0.504527	CNhs11226	CAGE:corpus striatum, neonate N00
1519	2.34107	2.19173	0.149346	0.791586	0.771062	0.0205237	0.00659049	0.0445604	0.020535	0.135498	0.504514	CNhs12109	CAGE:Mouse Meningeal cells,
1583	1.50957	1.44901	0.0605609	0.673313	0.660721	0.0125922	0.00666166	0.044857	0.0294947	0.16944	0.504507	CNhs13018	CAGE:cerebellum, embryo E15, biol_ (E15R3)
1635	0.286163	0.256048	0.0301148	0.153163	0.14774	0.00542293	0.00674426	0.0452278	0.0307732	0.17136	0.504499	CNhs14335	CAGE:natural helper cells, IL2 treated, day15, biol_, tech_rep2
1414	0.77941	0.721573	0.0578374	0.375379	0.362347	0.013032	0.00695744	0.0464678	0.02794	0.164536	0.504479	CNhs11037	CAGE:pituitary gland, embryo E14
969	5.59469	5.23463	0.360057	1.32372	1.30694	0.0167829	0.00720766	0.0479441	0.0176893	0.12314	0.504455	ENCFF102KDV	CHIP:H3K36me3:C57BL/6 midbrain embryo (10.5 days)
1342	0.699965	0.608729	0.0912368	0.300091	0.28791	0.0121813	0.00724856	0.0480217	0.0164003	0.118569	0.504452	CNhs10524	CAGE:liver, embryo E13
1598	1.59207	1.49211	0.0999645	0.644101	0.627549	0.0165527	0.00732871	0.0483577	0.0185584	0.127379	0.504444	CNhs13082	CAGE:neurospheres - sympathetic neuron derived, biol_
1380	1.07366	0.986583	0.0870718	0.498966	0.487109	0.0118569	0.00736915	0.04843	0.00559318	0.0681555	0.504441	CNhs11001	CAGE:kidney, embryo E18
1633	0.609626	0.554852	0.0547736	0.293837	0.286391	0.00744614	0.00748282	0.0489812	0.0703893	0.291219	0.504431	CNhs14159	CAGE:CD4+CD25+ regulatory T cells, antiCD3 CD28 stimulation, 06hr, pool1 (C57BL 6J)
1503	1.37584	1.27166	0.104177	0.616491	0.601644	0.0148471	0.00757896	0.0494136	0.0394263	0.199931	0.504422	CNhs11222	CAGE:testis, neonate N07
1374	5.33171	5.09996	0.231751	1.26053	1.24296	0.0175741	0.00761479	0.049451	0.0296439	0.169704	0.504419	CNhs10609	CAGE:Clontech Mouse Universal Reference Total RNA, pool1
1541	0.616825	0.575654	0.041171	0.276345	0.268787	0.00755811	0.0078496	0.0507091	0.0333535	0.180024	0.504399	CNhs12555	CAGE:Lgr5 positive intestinal stem cells, pool1
1536	1.4159	1.29681	0.119084	0.448407	0.437452	0.0109552	0.00788055	0.0507091	0.119374	0.389242	0.504396	CNhs12540	CAGE:MC1+Gr1+ myeloid-derived suppressor cells control, (4,5,6PBS)
1551	2.6785	2.53162	0.146886	0.857632	0.837325	0.0203068	0.00790111	0.0507091	0.0442299	0.218885	0.504395	CNhs12629	CAGE:Mouse Microglia,
1588	0.547249	0.514002	0.0332476	0.319956	0.310462	0.0094938	0.00795475	0.0508547	0.013279	0.107028	0.50439	CNhs13024	CAGE:cerebellum, neonate N03, biol_ (P3R3)
1521	3.75494	3.63428	0.120665	1.04379	1.02521	0.0185817	0.00802584	0.0511103	0.0118396	0.102099	0.504384	CNhs12134	CAGE:Mouse Neurons - striatal,
1639	1.82946	1.6554	0.174055	0.576651	0.560937	0.015714	0.00813081	0.0515789	0.0507841	0.238395	0.504376	CNhs14379	CAGE:natural helper cells, IL33 treated, day02, biol_, tech_
1509	2.19741	2.10886	0.0885408	0.804476	0.789755	0.0147217	0.00816941	0.0516244	0.0262139	0.157764	0.504373	CNhs11228	CAGE:hippocampus, neonate N00
1354	0.760841	0.686918	0.0739233	0.353276	0.340004	0.0132715	0.00823656	0.0518493	0.0220721	0.142213	0.504367	CNhs10585	CAGE:intestine, embryo E16
1575	1.70949	1.64318	0.0663087	0.738173	0.724747	0.0134266	0.00828689	0.0518568	0.0699585	0.290992	0.504363	CNhs13010	CAGE:cerebellum, neonate N00, biol_ (P0R2)
680	1.51765	1.46017	0.0574781	0.605176	0.588561	0.0166153	0.00830087	0.0518568	0.0125844	0.103381	0.504362	ENCFF827WXG	CHIP:H3K27ac:C57BL/6 forebrain embryo (11.5 days)
1365	0.567151	0.517612	0.049539	0.289686	0.27812	0.0115661	0.00840928	0.052335	0.042072	0.210745	0.504353	CNhs10598	CAGE:forelimb, embryo E17
1606	1.08402	1.015	0.0690258	0.465111	0.457907	0.00720394	0.00845014	0.0523909	0.0247938	0.15257	0.50435	CNhs13209	CAGE:Mouse hepatic Sinusoidal Endothelial Cells,
1610	0.884012	0.801687	0.0823253	0.336403	0.326358	0.0100441	0.00848941	0.0524365	0.11103	0.378225	0.504347	CNhs13218	CAGE:CD4+CD25-CD44- naive conventional T cells, antiCD3_CD28 stimulation, 06hr, pool1 (C57BL_6J)
1297	1.04606	0.940735	0.105323	0.415466	0.406138	0.00932845	0.00852455	0.0524563	0.0200186	0.13316	0.504344	CNhs10475	CAGE:accessory axillary lymph node, adult
1436	1.0359	0.947657	0.0882393	0.4457	0.434513	0.0111877	0.00877467	0.053794	0.00940022	0.0912969	0.504325	CNhs11108	CAGE:skin, neonate N10
870	5.67475	5.30603	0.368728	1.3205	1.30406	0.0164417	0.00892849	0.0545335	0.0215046	0.139652	0.504313	ENCFF450RTN	CHIP:H3K36me3:C57BL/6 forebrain embryo (10.5 days)
1361	0.681791	0.594792	0.0869992	0.308234	0.297927	0.010307	0.00920025	0.0559852	0.0424173	0.211829	0.504293	CNhs10594	CAGE:liver, embryo E14
1520	2.89119	2.761	0.130191	0.881395	0.863594	0.0178015	0.00926318	0.0561602	0.01618	0.118569	0.504288	CNhs12359	CAGE:Mouse Neurons - hippocampal,
1612	2.03811	1.84395	0.194158	0.584712	0.573727	0.0109847	0.00934301	0.0564359	0.0386612	0.197268	0.504282	CNhs13220	CAGE:CD4+CD25-CD44- naive conventional T cells, pool2 (Balb_cAJcl)
1320	2.40629	2.31146	0.0948286	0.842898	0.829955	0.0129429	0.0093972	0.0565553	0.00297549	0.0512586	0.504278	CNhs10501	CAGE:corpora quadrigemina, adult
1353	0.166218	0.150505	0.0157139	0.110023	0.104518	0.00550518	0.00953233	0.0571592	0.014153	0.110636	0.504269	CNhs10584	CAGE:kidney, embryo E16
658	2.01904	1.94384	0.0752012	0.717989	0.702252	0.0157377	0.0100794	0.0602198	0.0547612	0.247178	0.504231	ENCFF406MDW	CHIP:H3K27ac:C57BL/6 midbrain embryo (12.5 days)
1063	2.05396	1.95755	0.0964074	0.727041	0.716069	0.010972	0.0102903	0.0610569	0.0516781	0.241213	0.504217	ENCFF604BOY	CHIP:H3K27ac:C57BL/6 stomach embryo (15.5 days)
1616	0.554871	0.516728	0.038143	0.252241	0.244477	0.00776376	0.0103123	0.0610569	0.0711861	0.291646	0.504215	CNhs13228	CAGE:GP2+ M cell, pool1
541	1.92958	1.84867	0.0809141	0.71411	0.701816	0.0122944	0.010331	0.0610569	0.0308522	0.17136	0.504214	ENCFF298GLI	CHIP:H3K27ac:C57BL/6 kidney embryo (14.5 days)
1530	1.27117	1.149	0.122174	0.4516	0.440607	0.0109929	0.0103761	0.0611039	0.116232	0.38808	0.504211	CNhs12509	CAGE:natural helper cells, IL2 treated, day15, biol_, tech_rep1
1483	2.79456	2.67636	0.118198	0.926809	0.912551	0.0142579	0.0105245	0.0616195	0.00659573	0.0774056	0.504201	CNhs11200	CAGE:medulla oblongata, neonate N30
1624	0.756933	0.678627	0.0783062	0.312611	0.304098	0.00851285	0.0105387	0.0616195	0.0866389	0.327236	0.5042	CNhs13511	CAGE:Mouse CD8+ T Cells,
683	2.20576	2.28076	-0.0749919	0.647302	0.637198	0.0101041	0.0106106	0.0618202	0.0459738	0.224139	0.504195	ENCFF081AUZ	CHIP:H3K4me3:C57BL/6 midbrain embryo (11.5 days)
1611	1.80109	1.63294	0.168145	0.533145	0.5212	0.0119447	0.0108234	0.0628207	0.0771816	0.30483	0.504182	CNhs13219	CAGE:CD4+CD25-CD44- naive conventional T cells, PMA and ionomycin stimulation, 02hr, pool1 (C57BL_6J)
1630	0.362752	0.331327	0.0314245	0.176901	0.171536	0.00536448	0.0108588	0.0628207	0.0752201	0.299967	0.50418	CNhs14142	CAGE:CD4+CD25+ regulatory T cells, PMA and ionomycin stimulation, 02hr, pool1 (C57BL 6J)
1301	1.16351	1.10104	0.0624763	0.515775	0.502519	0.0132558	0.0111977	0.0645538	0.0164072	0.118569	0.504158	CNhs10480	CAGE:mammary gland, adult lactating day02
1426	1.34589	1.22817	0.117728	0.535722	0.522877	0.0128453	0.0112493	0.0646246	0.0493669	0.235101	0.504155	CNhs11097	CAGE:skin, neonate N06
1574	1.64709	1.58003	0.0670635	0.708497	0.69553	0.0129671	0.0113286	0.0647876	0.013289	0.107028	0.50415	CNhs13009	CAGE:cerebellum, embryo E18, biol_ (E18R2)
808	2.46449	2.4527	0.011785	0.708149	0.69092	0.0172286	0.0113566	0.0647876	0.0986747	0.354754	0.504149	ENCFF181ZVG	CHIP:H3K4me2:C57BL/6 forebrain embryo (16.5 days)
1528	3.25635	2.97936	0.276991	0.825926	0.809591	0.016335	0.0115118	0.0654458	0.0350084	0.184948	0.504139	CNhs12551	CAGE:common myeloid progenitor CMP, biol_
910	2.2469	2.14257	0.104329	0.74942	0.736292	0.0131279	0.011661	0.0660655	0.0498898	0.235622	0.50413	ENCFF829GXB	CHIP:H3K27ac:C57BL/6 intestine embryo (16.5 days)
1554	1.40436	1.33047	0.0738882	0.601346	0.588323	0.0130229	0.0118088	0.0666728	0.0628778	0.268333	0.504121	CNhs12818	CAGE:cerebellum, embryo E17, biol_ (E17R1)
532	2.39559	2.48595	-0.0903521	0.676909	0.668092	0.00881714	0.0118951	0.0669302	0.034923	0.184948	0.504116	ENCFF030BTL	CHIP:H3K4me3:C57BL/6 neural tube embryo (15.5 days)
1590	0.923718	0.874266	0.0494518	0.482936	0.47124	0.0116957	0.011986	0.0672116	0.0214395	0.139652	0.504111	CNhs13026	CAGE:cerebellum, neonate N09, biol_ (P9R3)
1615	1.25834	1.14239	0.11595	0.416017	0.405947	0.01007	0.0121343	0.06773	0.0842244	0.320532	0.504102	CNhs13226	CAGE:CD4+CD25-CD44- naive conventional T cells, PMA and ionomycin stimulation, 02hr, pool2 (Balb_cAJcl)
1632	0.68083	0.615956	0.0648742	0.307444	0.298954	0.00848946	0.0121609	0.06773	0.0440261	0.218534	0.504101	CNhs14158	CAGE:CD4+CD25+ regulatory T cells, antiCD3 CD28 stimulation, 06hr, pool1 (BalbcA)
1484	2.28289	2.18633	0.0965588	0.82649	0.814028	0.0124623	0.012248	0.0679847	0.00471012	0.0620002	0.504096	CNhs11201	CAGE:diencephalon, neonate N30
928	2.48957	2.39427	0.0953009	0.790206	0.774825	0.0153812	0.0123078	0.0680864	0.117137	0.389242	0.504092	ENCFF416UPA	CHIP:H3K27ac:C57BL/6 midbrain embryo (13.5 days)
1398	0.8327	0.759683	0.0730168	0.389508	0.376201	0.0133072	0.0126137	0.0695231	0.0370414	0.190781	0.504075	CNhs11019	CAGE:intestine, embryo E12
1572	1.05577	1.01129	0.0444738	0.543857	0.533094	0.0107628	0.0126933	0.0695231	0.0485721	0.233345	0.504071	CNhs13007	CAGE:cerebellum, embryo E16, biol_ (E16R2)
1307	0.945338	0.90115	0.0441887	0.465991	0.45704	0.00895119	0.0126944	0.0695231	0.0170391	0.121149	0.504071	CNhs10487	CAGE:corpus striatum, adult
856	5.34398	4.98584	0.35814	1.28982	1.27409	0.0157269	0.0128097	0.0699214	0.027805	0.164456	0.504064	ENCFF644DVO	CHIP:H3K36me3:C57BL/6 embryonic facial prominence embryo (10.5 days)
1570	1.62407	1.54395	0.0801215	0.676126	0.662418	0.0137077	0.0129335	0.0703635	0.0105064	0.0975258	0.504057	CNhs13005	CAGE:cerebellum, embryo E14, biol_ (E14R2)
1324	2.14859	2.05026	0.0983264	0.799565	0.785624	0.0139411	0.012978	0.0703725	0.0117919	0.102099	0.504055	CNhs10505	CAGE:spinal cord, adult
1626	0.886254	0.834398	0.051856	0.348199	0.340498	0.00770155	0.0130988	0.0705623	0.093876	0.342752	0.504048	CNhs13542	CAGE:CD326+ enterocyte, pool1
1470	0.380571	0.352177	0.0283935	0.224662	0.217689	0.00697275	0.0130989	0.0705623	0.0959574	0.348031	0.504048	CNhs11187	CAGE:intestine, neonate N20
177	0.264232	0.251728	0.012504	0.1805	0.174658	0.00584203	0.0133164	0.0713178	0.10019	0.357008	0.504037	UW19.1	ATAC:Astrocytes-clusters_19-cluster_1
1321	0.923053	0.844152	0.0789012	0.403127	0.392933	0.010194	0.013326	0.0713178	0.0533984	0.244383	0.504036	CNhs10502	CAGE:vagina, adult
859	2.69701	2.55833	0.138674	0.8181	0.805854	0.0122457	0.0134163	0.0715682	0.0729609	0.294532	0.504031	ENCFF069OMF	CHIP:H3K27ac:C57BL/6 stomach embryo (16.5 days)
709	2.12476	2.0151	0.109658	0.729365	0.716981	0.0123838	0.0135453	0.071981	0.0267861	0.160035	0.504025	ENCFF036PPT	CHIP:H3K27ac:C57BL/6 stomach embryo (14.5 days)
1300	1.77632	1.697	0.0793208	0.698124	0.686132	0.0119922	0.013583	0.071981	0.0105021	0.0975258	0.504023	CNhs10478	CAGE:hippocampus, adult
780	2.3578	2.2351	0.122703	0.769579	0.755156	0.0144236	0.0136358	0.071981	0.0166125	0.119189	0.50402	ENCFF251XZW	CHIP:H3K27ac:C57BL/6 intestine embryo (14.5 days)
193	0.262147	0.250871	0.0112766	0.173478	0.169578	0.00390039	0.01368	0.071981	0.0802301	0.310973	0.504018	UW25.1	ATAC:Podocytes-clusters_25-cluster_1
542	1.92934	1.79693	0.13241	0.71412	0.7002	0.0139207	0.0137127	0.071981	0.156249	0.447241	0.504016	ENCFF274AWM	CHIP:H3K27ac:C57BL/6 liver embryo (11.5 days)
766	1.57377	1.584	-0.0102248	0.634891	0.622388	0.012503	0.0140125	0.0733202	0.0970406	0.351184	0.504	ENCFF855PPC	CHIP:H3K9ac:C57BL/6 forebrain embryo (11.5 days)
549	1.87208	1.762	0.110083	0.806099	0.794688	0.0114109	0.0141078	0.0734972	0.142837	0.429265	0.503996	ENCFF985XJA	CHIP:H3K36me3:C57BL/6 forebrain embryo (11.5 days)
1542	0.933787	0.866437	0.06735	0.368077	0.358726	0.00935018	0.0141358	0.0734972	0.0286497	0.167285	0.503994	CNhs12556	CAGE:Lgr5 positive intestinal stem cells, pool2
669	2.11885	2.11907	-0.000220776	0.638062	0.623496	0.0145656	0.0142221	0.0737129	0.103794	0.361418	0.50399	ENCFF770WCB	CHIP:H3K4me2:C57BL/6 midbrain embryo (11.5 days)
309	2.45069	2.40649	0.0441983	0.92633	0.914797	0.0115327	0.0142959	0.0738621	0.0401459	0.202953	0.503986	ENCFF733KTU	CHIP:H3K4me1:C57BL/6 olfactory bulb male adult (8 weeks)
621	1.54684	1.46104	0.0857946	0.731605	0.721888	0.00971717	0.0143621	0.0739713	0.0308322	0.17136	0.503983	ENCFF480NZE	CHIP:H3K36me3:C57BL/6 hindbrain embryo (11.5 days)
1277	1.94426	1.91363	0.0306321	0.545607	0.539358	0.00624907	0.0144117	0.0739951	0.0356093	0.187519	0.50398	GSM874962	CHIP:H3K4me3:H3K4me3_ZT22 / H3K4me3 IP / .
641	3.66551	3.42104	0.24447	1.11375	1.09931	0.0144473	0.0144916	0.0741735	0.0715358	0.291646	0.503976	ENCFF841DUP	CHIP:H3K36me3:C57BL/6 limb embryo (12.5 days)
1016	2.34687	2.42401	-0.0771418	0.678496	0.668633	0.00986385	0.0145965	0.0744784	0.034322	0.182495	0.503971	ENCFF314QNW	CHIP:H3K4me3:C57BL/6 forebrain embryo (13.5 days)
1581	1.21989	1.15995	0.0599416	0.566349	0.555112	0.0112371	0.0146504	0.0745221	0.051991	0.241213	0.503969	CNhs13016	CAGE:cerebellum, embryo E13, biol_ (E13R3)
1471	2.02239	1.89435	0.128044	0.809396	0.79269	0.0167056	0.01479	0.0749999	0.0708993	0.291219	0.503962	CNhs11188	CAGE:eyeball, neonate N16
1556	1.0789	1.02301	0.0558863	0.555116	0.543612	0.0115039	0.0148456	0.0750501	0.0581137	0.255981	0.503959	CNhs12820	CAGE:cerebellum, neonate N09, biol_ (P9R1)
1580	0.941031	0.872314	0.0687172	0.417765	0.407744	0.0100208	0.0150024	0.0756105	0.0507781	0.238395	0.503951	CNhs13015	CAGE:cerebellum, embryo E12, biol_ (E12R3)
794	1.86468	1.75404	0.110641	0.808453	0.796513	0.0119402	0.0156388	0.0785767	0.103387	0.361418	0.503921	ENCFF362GRX	CHIP:H3K36me3:C57BL/6 neural tube embryo (11.5 days)
1084	2.26792	2.22782	0.0401034	0.780996	0.765968	0.0150275	0.0157457	0.0788727	0.10406	0.361418	0.503916	ENCFF708MBZ	CHIP:H3K9ac:C57BL/6 embryonic facial prominence embryo (14.5 days)
1421	0.863257	0.790347	0.0729104	0.410576	0.396119	0.0144578	0.0158491	0.0790931	0.0129194	0.105605	0.503912	CNhs11044	CAGE:gonad, embryo E13
1587	0.96482	0.920782	0.0440382	0.498768	0.488479	0.0102894	0.015886	0.0790931	0.0314464	0.172797	0.50391	CNhs13022	CAGE:cerebellum, neonate N00, biol_ (P0R3)
1582	1.57649	1.50422	0.0722674	0.674361	0.661317	0.0130436	0.0159746	0.0792379	0.0125108	0.103381	0.503906	CNhs13017	CAGE:cerebellum, embryo E14, biol_ (E14R3)
72	0.346443	0.332472	0.0139703	0.208279	0.202919	0.00535952	0.0160116	0.0792379	0.0771473	0.30483	0.503904	ENCFF586XFN	DNASE:C57BL/6 Muller cell postnatal (12 days)
1338	0.815373	0.715448	0.0999249	0.339235	0.327617	0.011618	0.0161275	0.0795721	0.0740015	0.295917	0.503899	CNhs10520	CAGE:liver, embryo E15
1429	1.55447	1.4844	0.070074	0.6547	0.641237	0.0134628	0.0163911	0.0806303	0.0696012	0.290241	0.503887	CNhs11101	CAGE:liver, neonate N06
801	2.56485	2.42615	0.138702	0.803209	0.789363	0.0138455	0.0166072	0.0814497	0.0873654	0.328629	0.503878	ENCFF173XOV	CHIP:H3K27ac:C57BL/6 lung embryo (14.5 days)
66	0.200596	0.196506	0.00408998	0.13994	0.135324	0.00461575	0.0168286	0.0822897	0.122219	0.391182	0.503868	ENCFF266ZDD	DNASE:C57BL/6 retina embryo (14.5 days)
834	2.8975	2.7391	0.1584	1.02799	1.01527	0.0127126	0.0169383	0.0825803	0.0357904	0.187871	0.503863	ENCFF073JCW	CHIP:H3K36me3:C57BL/6 hindbrain embryo (12.5 days)
1397	0.994096	0.917955	0.0761417	0.45008	0.436321	0.0137587	0.0171175	0.0832071	0.0499065	0.235622	0.503855	CNhs11018	CAGE:pituitary gland, embryo E12
59	0.259217	0.253182	0.00603518	0.167947	0.16376	0.0041866	0.0172054	0.0832355	0.0305528	0.17136	0.503852	ENCFF149TTQ	DNASE:C57BL/6 forebrain embryo (14.5 days)
1584	1.45502	1.38882	0.0662011	0.636457	0.623788	0.012669	0.0172246	0.0832355	0.0116445	0.102099	0.503851	CNhs13019	CAGE:cerebellum, embryo E16, biol_ (E16R3)
1051	2.7171	2.70431	0.01279	0.737767	0.723071	0.0146953	0.0176213	0.0849024	0.189331	0.493829	0.503834	ENCFF924CKT	CHIP:H3K4me2:C57BL/6 forebrain postnatal (0 days)
951	2.47758	2.48028	-0.00269127	0.686722	0.673161	0.013561	0.0177487	0.0852663	0.171013	0.47067	0.503829	ENCFF399YKQ	CHIP:H3K4me2:C57BL/6 midbrain embryo (12.5 days)
730	2.96949	2.83727	0.132222	0.887697	0.871127	0.01657	0.0179073	0.0853487	0.196724	0.50206	0.503822	ENCFF923TVC	CHIP:H3K27ac:C57BL/6 hindbrain embryo (13.5 days)
1613	1.82474	1.64677	0.177966	0.548366	0.538404	0.00996149	0.0179524	0.0853487	0.0375684	0.192289	0.50382	CNhs13221	CAGE:CD4+CD25+ regulatory T cells, pool2 (Balb_cAJcl)
334	2.37785	2.42601	-0.0481689	0.665902	0.657331	0.00857055	0.0179689	0.0853487	0.114331	0.384931	0.50382	ENCFF069XTE	CHIP:H3K4me3:C57BL/6 olfactory bulb male adult (8 weeks)
1567	1.13449	1.05754	0.0769536	0.524455	0.513069	0.0113864	0.0179736	0.0853487	0.120062	0.389242	0.503819	CNhs13002	CAGE:cerebellum, embryo E11, biol_ (E11R2)
1109	2.30182	2.24484	0.056978	0.766309	0.749184	0.0171247	0.0182226	0.0860536	0.0335285	0.180024	0.503809	ENCFF773NIS	CHIP:H3K27ac:C57BL/6 midbrain embryo (10.5 days)
594	2.53915	2.63071	-0.0915587	0.664276	0.654002	0.0102745	0.0182268	0.0860536	0.0541845	0.245401	0.503809	ENCFF041JZL	CHIP:H3K4me3:C57BL/6 forebrain embryo (16.5 days)
853	2.0297	1.91222	0.117483	0.844752	0.832534	0.0122182	0.0183234	0.0862615	0.181273	0.485859	0.503805	ENCFF208SBA	CHIP:H3K36me3:C57BL/6 midbrain embryo (11.5 days)
1318	0.944476	0.876544	0.0679316	0.410981	0.400662	0.0103186	0.0184027	0.0863175	0.115946	0.38808	0.503802	CNhs10499	CAGE:tongue, adult
816	2.06799	2.12538	-0.0573869	0.636281	0.625456	0.0108255	0.0184841	0.0863175	0.152652	0.440786	0.503799	ENCFF669USU	CHIP:H3K4me3:C57BL/6 hindbrain postnatal (0 days)
979	3.66263	3.49683	0.1658	0.843588	0.829561	0.0140271	0.0185341	0.0863175	0.183697	0.487644	0.503797	ENCFF084MIV	CHIP:H3K4me2:C57BL/6 limb embryo (13.5 days)
1577	1.47148	1.39871	0.0727683	0.663386	0.650069	0.0133176	0.0185454	0.0863175	0.0119474	0.102099	0.503796	CNhs13012	CAGE:cerebellum, neonate N06, biol_ (P6R2)
1557	0.947819	0.904217	0.0436023	0.49173	0.482165	0.00956529	0.0188821	0.0876364	0.00991111	0.093586	0.503783	CNhs12923	CAGE:Neurons - substantia nigra, , tech_
731	2.99844	2.82492	0.173524	1.02961	1.01585	0.0137553	0.019004	0.0878497	0.0363764	0.189433	0.503778	ENCFF701NCZ	CHIP:H3K36me3:C57BL/6 forebrain embryo (12.5 days)
70	0.197114	0.189789	0.00732441	0.148451	0.143148	0.00530277	0.019035	0.0878497	0.0930255	0.341926	0.503777	ENCFF945EBN	DNASE:C57BL/6 neural tube embryo (10.50 days)
614	2.10145	2.15303	-0.0515752	0.648497	0.639153	0.00934368	0.0191257	0.088021	0.0542183	0.245401	0.503773	ENCFF493WPM	CHIP:H3K4me3:C57BL/6 hindbrain embryo (12.5 days)
1599	2.01399	1.88922	0.124771	0.74256	0.723676	0.0188841	0.0192106	0.0881625	0.0240388	0.151322	0.50377	CNhs13084	CAGE:neurospheres - parasympathetic neuron derived, biol_
1273	1.65257	1.61911	0.0334617	0.488135	0.481147	0.00698829	0.0193715	0.0881625	0.0935548	0.342752	0.503764	GSM874958	CHIP:H3K4me3:H3K4me3_ZT06 / H3K4me3 IP / .
525	3.81605	3.7441	0.0719533	1.18823	1.17325	0.0149761	0.0194154	0.0881625	0.298885	0.616919	0.503762	ENCFF043LTY	CHIP:H3K4me1:129 E14TG2a.4
565	3.56081	3.36893	0.191885	1.12923	1.11563	0.0135971	0.0194281	0.0881625	0.0116135	0.102099	0.503762	ENCFF654YXS	CHIP:H3K36me3:C57BL/6 forebrain embryo (13.5 days)
892	2.34816	2.27597	0.0721941	0.78781	0.770888	0.0169213	0.0194313	0.0881625	0.0577308	0.254978	0.503761	ENCFF782RAO	CHIP:H3K27ac:C57BL/6 hindbrain embryo (10.5 days)
1623	0.391025	0.355144	0.0358807	0.197141	0.191567	0.00557354	0.0194784	0.0881625	0.104309	0.361418	0.50376	CNhs13509	CAGE:Mouse CD4+ T Cells,
827	1.91751	1.89688	0.0206275	0.624516	0.610165	0.0143516	0.0197347	0.0888936	0.0761236	0.302836	0.50375	ENCFF338BLF	CHIP:H3K4me2:C57BL/6 neural tube embryo (11.5 days)
400	6.58004	6.15176	0.428285	1.39743	1.37984	0.017597	0.0197481	0.0888936	0.0335126	0.180024	0.503749	ENCFF410HES	CHIP:H3K36me3:CD-1 megakaryocyte embryo (14.5 days)
1072	2.98241	2.96318	0.0192339	0.746976	0.733563	0.0134137	0.0198195	0.0889048	0.104048	0.361418	0.503747	ENCFF672TTE	CHIP:H3K4me2:C57BL/6 hindbrain embryo (13.5 days)
410	6.14872	5.65712	0.4916	1.18515	1.16626	0.0188905	0.0198588	0.0889048	0.134909	0.415085	0.503745	ENCFF750FWM	CHIP:H3K36me3:129 G1E-ER4 treated with 10 nM 17B-estradiol for 24 hours
786	2.23549	2.15692	0.0785699	0.762533	0.748856	0.0136773	0.0199283	0.0889732	0.189657	0.493829	0.503742	ENCFF616CNP	CHIP:H3K27ac:C57BL/6 midbrain embryo (15.5 days)
1562	1.31979	1.25338	0.0664053	0.561339	0.548883	0.0124567	0.0199956	0.0889874	0.0171069	0.121149	0.50374	CNhs12961	CAGE:cerebellum, embryo E15, biol_ (E15R1)
775	2.90748	2.8974	0.010078	0.751757	0.738912	0.0128449	0.0200398	0.0889874	0.205097	0.509919	0.503738	ENCFF856ZXY	CHIP:H3K4me3:C57BL/6 limb embryo (13.5 days)
949	2.80762	2.81398	-0.00636578	0.717528	0.703996	0.0135325	0.02011	0.0890585	0.165244	0.46211	0.503736	ENCFF769YBW	CHIP:H3K4me2:C57BL/6 midbrain embryo (13.5 days)
571	2.73766	2.5866	0.151058	0.998975	0.986287	0.0126884	0.0202018	0.0892246	0.0304899	0.17136	0.503732	ENCFF846FSQ	CHIP:H3K36me3:C57BL/6 neural tube embryo (12.5 days)
689	2.82401	2.70162	0.122388	0.870142	0.853172	0.01697	0.0204204	0.0899481	0.0573429	0.254634	0.503724	ENCFF066PYN	CHIP:H3K27ac:C57BL/6 neural tube embryo (13.5 days)
818	3.07724	2.91562	0.161628	0.907165	0.890556	0.0166093	0.020531	0.0901938	0.130335	0.407611	0.50372	ENCFF071HGW	CHIP:H3K27ac:C57BL/6 embryonic facial prominence embryo (14.5 days)
517	2.22016	2.1017	0.118457	0.764453	0.749637	0.0148161	0.0206229	0.0903557	0.0850886	0.322121	0.503717	ENCFF538TEQ	CHIP:H3K27ac:C57BL/6 limb embryo (14.5 days)
1446	1.74764	1.62981	0.117822	0.69634	0.682882	0.0134587	0.0208116	0.0909399	0.0553774	0.248392	0.50371	CNhs11118	CAGE:heart, neonate N10
654	1.76129	1.72491	0.0363804	0.691878	0.681249	0.0106294	0.0208757	0.090978	0.0675614	0.283172	0.503707	ENCFF610GUY	CHIP:H3K9ac:C57BL/6 lung embryo (14.5 days)
987	2.81878	2.78905	0.0297275	0.758688	0.744013	0.0146755	0.0210472	0.0914829	0.269646	0.589918	0.503701	ENCFF035FHN	CHIP:H3K4me2:C57BL/6 hindbrain postnatal (0 days)
758	2.37802	2.25903	0.118981	0.81162	0.798132	0.0134876	0.0212959	0.0923197	0.177961	0.481696	0.503692	ENCFF033PTH	CHIP:H3K27ac:C57BL/6 embryonic facial prominence embryo (15.5 days)
1550	2.11314	1.98225	0.130898	0.67277	0.654476	0.0182946	0.0213531	0.0923243	0.0453831	0.223247	0.50369	CNhs12628	CAGE:Mouse Mesenchymal stem cells - bone marrow derived,
1299	2.40039	2.29456	0.105835	0.838814	0.824672	0.0141419	0.0216259	0.093258	0.00242835	0.0480695	0.503681	CNhs10477	CAGE:medulla oblongata, adult
673	2.60439	2.59826	0.00612569	0.710941	0.696607	0.014334	0.0216969	0.0933195	0.259152	0.577729	0.503678	ENCFF921KVA	CHIP:H3K4me2:C57BL/6 forebrain embryo (14.5 days)
413	6.1533	5.72833	0.424963	1.16343	1.14481	0.0186265	0.0218053	0.093493	0.0216901	0.140303	0.503674	ENCFF613LOW	CHIP:H3K36me3:129 G1E
1585	0.739225	0.701738	0.0374869	0.404425	0.395086	0.00933906	0.0218511	0.093493	0.0388657	0.197698	0.503673	CNhs13020	CAGE:cerebellum, embryo E17, biol_ (E17R3)
393	1.02568	1.01537	0.0103168	0.556149	0.549918	0.00623101	0.021938	0.093621	0.0324281	0.177598	0.50367	ENCFF163HEV	CHIP:H3K27ac:129 ES-E14
980	2.9347	2.76994	0.164763	1.02474	1.01154	0.0132005	0.0220735	0.0939555	0.00848188	0.086023	0.503665	ENCFF741GHS	CHIP:H3K36me3:C57BL/6 midbrain embryo (12.5 days)
690	1.21164	1.19015	0.0214931	0.554664	0.545538	0.00912631	0.022303	0.0943716	0.064589	0.274211	0.503657	ENCFF613PHO	CHIP:H3K9ac:C57BL/6 stomach embryo (14.5 days)
392	1.60672	1.58872	0.0180061	0.722709	0.714404	0.00830525	0.0223568	0.0943716	0.0778551	0.306019	0.503655	ENCFF809IES	CHIP:H3K9ac:129 ES-E14
540	2.61185	2.62041	-0.00855803	0.731598	0.719802	0.0117965	0.0223574	0.0943716	0.242284	0.557302	0.503655	ENCFF394ABQ	CHIP:H3K4me3:C57BL/6 embryonic facial prominence embryo (13.5 days)
1547	3.33528	3.20182	0.133457	1.00771	0.992574	0.0151388	0.022401	0.0943716	0.00944635	0.0912969	0.503654	CNhs12821	CAGE:Mouse Neurons - substantia nigra, , tech_
638	3.70971	3.49621	0.213499	1.13982	1.1245	0.0153207	0.0225733	0.0948542	0.0470613	0.227417	0.503648	ENCFF563GBE	CHIP:H3K36me3:C57BL/6 forebrain embryo (14.5 days)
1579	0.927879	0.8542	0.0736786	0.424999	0.413826	0.0111728	0.0226683	0.0949327	0.0339754	0.181829	0.503645	CNhs13014	CAGE:cerebellum, embryo E11, biol_ (E11R3)
581	2.15131	2.17473	-0.023423	0.676036	0.665955	0.0100808	0.0227076	0.0949327	0.0617084	0.265411	0.503643	ENCFF508WCS	CHIP:H3K4me3:C57BL/6 embryonic facial prominence embryo (12.5 days)
738	3.00564	2.85651	0.149131	1.06648	1.05386	0.0126182	0.0228808	0.0953205	0.0618769	0.26544	0.503637	ENCFF423EGY	CHIP:H3K36me3:C57BL/6 forebrain embryo (16.5 days)
1309	1.18116	1.12868	0.0524848	0.555278	0.545632	0.009646	0.0229939	0.0953205	0.0136825	0.109128	0.503634	CNhs10489	CAGE:olfactory brain, adult
1627	1.00223	0.897374	0.104853	0.38174	0.372954	0.00878647	0.022999	0.0953205	0.12929	0.407071	0.503634	CNhs13913	CAGE:CD4+CD25+ regulatory T cells, pool1 (C57BL_6J)
51	0.207164	0.199361	0.00780292	0.147604	0.142491	0.00511305	0.0230324	0.0953205	0.216324	0.526667	0.503632	ENCFF829UGS	DNASE:C57BL/6 embryo embryo (10.5 days)
1303	1.90178	1.81561	0.0861682	0.734274	0.722011	0.0122628	0.0236168	0.0972006	0.00961222	0.092356	0.503613	CNhs10482	CAGE:diencephalon, adult
1605	3.01555	2.75166	0.263894	0.789886	0.777679	0.0122073	0.02365	0.0972006	0.0462914	0.22502	0.503612	CNhs13212	CAGE:CD41+ megakaryocyte control,
661	2.67592	2.57151	0.104407	0.809008	0.793576	0.0154325	0.0236642	0.0972006	0.0809233	0.311375	0.503612	ENCFF900XUW	CHIP:H3K27ac:C57BL/6 midbrain embryo (14.5 days)
1108	2.39111	2.26508	0.126028	0.80833	0.793636	0.0146942	0.0237522	0.097319	0.0515505	0.241213	0.503609	ENCFF199SCG	CHIP:H3K27ac:C57BL/6 limb embryo (15.5 days)
666	2.42612	2.50876	-0.0826418	0.662674	0.65275	0.00992346	0.0240652	0.0982529	0.0953737	0.346679	0.503599	ENCFF330NUS	CHIP:H3K4me3:C57BL/6 forebrain postnatal (0 days)
1032	3.83032	3.55893	0.271389	1.14398	1.12877	0.0152148	0.0240998	0.0982529	0.0992436	0.35602	0.503597	ENCFF706SAT	CHIP:H3K36me3:C57BL/6 limb embryo (14.5 days)
704	2.30636	2.2156	0.0907631	0.773409	0.75785	0.0155588	0.0242218	0.0985061	0.120532	0.389242	0.503594	ENCFF107UHG	CHIP:H3K27ac:C57BL/6 forebrain embryo (13.5 days)
998	2.37044	2.36535	0.00509214	0.679459	0.665892	0.0135665	0.0242923	0.0985487	0.0999655	0.357008	0.503591	ENCFF660OFZ	CHIP:H3K4me2:C57BL/6 forebrain embryo (12.5 days)
1406	1.0288	0.947761	0.0810394	0.493154	0.481544	0.0116102	0.0245904	0.0992683	0.0298929	0.169917	0.503582	CNhs11028	CAGE:kidney, embryo E17
550	3.60885	3.43557	0.173282	1.15695	1.14372	0.0132291	0.0245905	0.0992683	0.0113441	0.102004	0.503582	ENCFF652HPR	CHIP:H3K36me3:C57BL/6 midbrain embryo (13.5 days)
633	3.33184	3.19794	0.133894	1.14626	1.13432	0.0119451	0.0247051	0.0993817	0.0610966	0.263624	0.503578	ENCFF692XLZ	CHIP:H3K36me3:C57BL/6 midbrain embryo (16.5 days)
880	2.97898	2.79398	0.184999	0.86311	0.848704	0.0144066	0.0247396	0.0993817	0.235681	0.549254	0.503577	ENCFF021RTZ	CHIP:H3K27ac:C57BL/6 heart embryo (15.5 days)
1597	1.60199	1.41524	0.186745	0.55242	0.540908	0.0115127	0.024974	0.100079	0.0936695	0.342752	0.50357	CNhs13213	CAGE:CD41+ megakaryocyte cancer,
1389	0.891376	0.816076	0.0753	0.434368	0.421113	0.013255	0.0250659	0.100203	0.0531668	0.244003	0.503567	CNhs11010	CAGE:intestine, embryo E13
1571	1.29689	1.23329	0.0636014	0.593809	0.58169	0.0121191	0.0252876	0.100844	0.0186067	0.127379	0.50356	CNhs13006	CAGE:cerebellum, embryo E15, biol_ (E15R2)
1573	1.58096	1.51429	0.0666618	0.685384	0.673477	0.0119069	0.0261657	0.104092	0.0365778	0.189582	0.503533	CNhs13008	CAGE:cerebellum, embryo E17, biol_ (E17R2)
591	2.23252	2.10087	0.131649	0.752632	0.740424	0.0122074	0.0263719	0.10466	0.326117	0.632597	0.503527	ENCFF937AXD	CHIP:H3K27ac:C57BL/6 heart embryo (12.5 days)
1028	2.79668	2.68204	0.114639	0.861405	0.844925	0.0164802	0.0264529	0.104728	0.122145	0.391182	0.503525	ENCFF502YGZ	CHIP:H3K27ac:C57BL/6 limb embryo (10.5 days)
833	1.57658	1.58182	-0.00524712	0.640982	0.629207	0.0117746	0.0269237	0.106336	0.078045	0.306033	0.503511	ENCFF794MAE	CHIP:H3K9ac:C57BL/6 midbrain embryo (11.5 days)
875	1.67768	1.66185	0.0158283	0.659862	0.64768	0.0121816	0.0272581	0.107186	0.162246	0.458812	0.503501	ENCFF244GAG	CHIP:H3K9ac:C57BL/6 kidney embryo (14.5 days)
1378	0.905889	0.825401	0.0804884	0.434282	0.423165	0.0111172	0.0272695	0.107186	0.0520575	0.241213	0.503501	CNhs10998	CAGE:lung, embryo E16
523	1.37089	1.3668	0.00408137	0.630338	0.619955	0.0103831	0.0277439	0.108791	0.187528	0.490618	0.503487	ENCFF379BOF	CHIP:H3K9ac:C57BL/6 midbrain postnatal (0 days)
1578	1.45692	1.39175	0.0651743	0.659352	0.647164	0.0121878	0.0280322	0.109659	0.0846066	0.321036	0.503479	CNhs13013	CAGE:cerebellum, neonate N09, biol_ (P9R2)
1634	0.828926	0.753352	0.075574	0.344496	0.336565	0.00793052	0.028296	0.110214	0.0953446	0.346679	0.503472	CNhs14160	CAGE:CD4+CD25+ regulatory T cells, PMA and ionomycin stimulation, 02hr, pool1 (BalbcA)
1566	1.92362	1.845	0.0786204	0.805545	0.791579	0.0139662	0.0283081	0.110214	0.0803383	0.310973	0.503471	CNhs13001	CAGE:cerebellum, neonate N03, biol_ (P3R1)
943	3.25876	3.04859	0.21017	0.884221	0.869453	0.0147679	0.0287765	0.111773	0.190741	0.494303	0.503458	ENCFF870SQY	CHIP:H3K27ac:C57BL/6 heart embryo (13.5 days)
660	3.10823	2.89665	0.211575	0.965431	0.954605	0.0108265	0.0289871	0.112325	0.072664	0.294372	0.503452	ENCFF785WPG	CHIP:H3K36me3:129 E14TG2a.4
749	1.65346	1.64731	0.00615191	0.659094	0.648138	0.0109566	0.0293903	0.113151	0.130743	0.407611	0.503441	ENCFF841NIU	CHIP:H3K9ac:C57BL/6 forebrain postnatal (0 days)
845	2.45958	2.4698	-0.0102155	0.67577	0.66343	0.0123395	0.0294045	0.113151	0.0738831	0.295917	0.503441	ENCFF777NSG	CHIP:H3K4me2:C57BL/6 midbrain embryo (15.5 days)
1548	4.08196	3.93892	0.143039	1.17954	1.16455	0.0149847	0.0294108	0.113151	0.0239836	0.151322	0.503441	CNhs12614	CAGE:Mouse Neurons - substantia nigra,
866	2.20437	2.27178	-0.0674076	0.651525	0.642314	0.00921029	0.0295361	0.113151	0.0288501	0.167494	0.503437	ENCFF682ZKK	CHIP:H3K4me3:C57BL/6 midbrain embryo (12.5 days)
1534	3.6112	3.31142	0.299782	0.873856	0.859429	0.0144269	0.0295446	0.113151	0.110236	0.377327	0.503437	CNhs12534	CAGE:stem cell (cKit+ Sca1- lineage-) KSL, biol_
879	2.40042	2.40079	-0.000375032	0.687358	0.678231	0.00912732	0.0299525	0.114234	0.202691	0.508327	0.503426	ENCFF029WVD	CHIP:H3K4me3:C57BL/6 intestine embryo (16.5 days)
556	3.16614	3.03527	0.130871	1.10515	1.0938	0.0113497	0.0299666	0.114234	0.0899973	0.333782	0.503426	ENCFF606CKV	CHIP:H3K36me3:C57BL/6 forebrain postnatal (0 days)
1399	1.14253	1.04267	0.0998665	0.500761	0.487553	0.0132089	0.030083	0.114413	0.0670323	0.281673	0.503423	CNhs11020	CAGE:lung, embryo E15
685	1.30365	1.28325	0.0203967	0.596094	0.583542	0.0125514	0.0302542	0.114798	0.0562682	0.251219	0.503418	ENCFF851ZPG	CHIP:H3K9ac:C57BL/6 limb embryo (11.5 days)
1030	3.53152	3.37776	0.153764	1.1767	1.1645	0.0121982	0.0307972	0.11659	0.0447416	0.220752	0.503404	ENCFF462IYV	CHIP:H3K36me3:C57BL/6 hindbrain embryo (16.5 days)
295	0.810731	0.782819	0.0279123	0.494357	0.485768	0.00858822	0.0314633	0.118837	0.101059	0.357844	0.503386	ENCFF595EFE	CHIP:POLR2A:C57BL/6 bone marrow male adult (8 weeks)
48	0.234717	0.229278	0.00543977	0.16462	0.15987	0.00475031	0.0316294	0.119154	0.162689	0.459274	0.503382	ENCFF009ALP	DNASE:C57BL/6 forebrain embryo (11.50 days)
1625	1.44391	1.31394	0.129967	0.488237	0.479504	0.00873315	0.0316921	0.119154	0.0813539	0.3123	0.503381	CNhs13531	CAGE:Mouse CD19+ B Cells,
65	0.215714	0.20908	0.00663371	0.153575	0.148445	0.00513014	0.0318499	0.119473	0.263579	0.58051	0.503377	ENCFF283WGI	DNASE:C57BL/6 hindbrain postnatal (0 days)
1368	0.747371	0.649637	0.0977341	0.318701	0.306798	0.0119032	0.0319982	0.119756	0.0720734	0.29311	0.503373	CNhs10601	CAGE:liver, embryo E12
978	3.22785	3.08774	0.140115	0.805784	0.792094	0.0136897	0.0321328	0.119987	0.189565	0.493829	0.503369	ENCFF173LCU	CHIP:H3K4me2:C57BL/6 embryonic facial prominence embryo (13.5 days)
920	2.09777	2.12341	-0.0256412	0.669698	0.6609	0.00879848	0.032254	0.120148	0.0893173	0.33201	0.503366	ENCFF306YUK	CHIP:H3K4me3:C57BL/6 limb embryo (11.5 days)
1377	1.48754	1.36465	0.122895	0.611475	0.596287	0.0151877	0.0323223	0.120148	0.01765	0.12314	0.503365	CNhs10997	CAGE:kidney, embryo E15
1522	5.63999	5.46294	0.177051	1.37734	1.35937	0.0179768	0.032466	0.12041	0.0575447	0.254841	0.503361	CNhs12632	CAGE:Mouse Neurons - ventral spinal cord,
27	0.268462	0.252565	0.0158968	0.167196	0.16104	0.00615554	0.0327532	0.121202	0.0708053	0.291219	0.503354	ENCFF673VVB	DNASE:CD-1 mesoderm male embryo (11.5 days)
1164	3.98741	3.86286	0.124548	1.08393	1.07137	0.0125524	0.0330542	0.12196	0.139795	0.423771	0.503346	GSM1479718	CHIP:PolII:PolII ZT 10 Bmal1 KO / Liver, Bmal1 KO, ZT 10, PolII ChIP / .
679	1.87454	1.8472	0.0273409	0.709354	0.696674	0.0126806	0.0331913	0.12196	0.185689	0.488774	0.503343	ENCFF443SGX	CHIP:H3K9ac:C57BL/6 limb embryo (14.5 days)
604	2.15295	2.07877	0.074182	0.820893	0.80752	0.0133732	0.0332298	0.12196	0.0622952	0.266539	0.503342	ENCFF033MMS	CHIP:H3K4me1:C57BL/6 forebrain embryo (16.5 days)
1568	0.927586	0.865299	0.062287	0.443567	0.433533	0.0100339	0.0332551	0.12196	0.0550558	0.247827	0.503341	CNhs13003	CAGE:cerebellum, embryo E12, biol_ (E12R2)
552	4.75776	4.51099	0.246775	1.31526	1.3018	0.0134546	0.0334692	0.122472	0.0977112	0.35206	0.503336	ENCFF371WPS	CHIP:H3K36me3:C57BL/6 hindbrain embryo (14.5 days)
792	2.63914	2.50449	0.134651	0.991221	0.979909	0.0113118	0.0336812	0.122605	0.1013	0.357927	0.503331	ENCFF393XPO	CHIP:H3K36me3:C57BL/6 forebrain embryo (15.5 days)
889	2.60577	2.43857	0.167196	0.948425	0.936442	0.0119834	0.0336881	0.122605	0.254338	0.574421	0.503331	ENCFF772NBP	CHIP:H3K36me3:C57BL/6 embryonic facial prominence embryo (12.5 days)
1295	2.36485	2.27048	0.0943687	0.828861	0.817611	0.0112505	0.0338069	0.122605	0.0278263	0.164456	0.503328	CNhs10473	CAGE:cortex, adult
1096	3.03966	3.02161	0.0180511	0.757452	0.745022	0.0124294	0.0338573	0.122605	0.0911071	0.33638	0.503327	ENCFF237WUZ	CHIP:H3K4me2:C57BL/6 neural tube embryo (13.5 days)
734	2.46857	2.35328	0.115294	0.793609	0.784338	0.00927073	0.0339511	0.122605	0.125708	0.400945	0.503324	ENCFF224LDB	CHIP:H3K27ac:C57BL/6 stomach postnatal (0 days)
1163	8.61447	8.31216	0.302315	1.55063	1.53558	0.015051	0.0339533	0.122605	0.200478	0.505968	0.503324	GSM1479717	CHIP:PolII:PolII ZT 6 Bmal1 KO / Liver, Bmal1 KO, ZT 6, PolII ChIP / .
1276	1.68596	1.64807	0.0378877	0.540713	0.532039	0.00867343	0.0343341	0.123516	0.0977013	0.35206	0.503315	GSM874961	CHIP:H3K4me3:H3K4me3_ZT18 / H3K4me3 IP / .
56	0.201783	0.194902	0.00688125	0.150785	0.145985	0.00480041	0.0343559	0.123516	0.208936	0.515438	0.503315	ENCFF906WCV	DNASE:C57BL/6 midbrain embryo (11.5 days)
911	3.76843	3.53098	0.237445	1.14412	1.13113	0.0129843	0.034525	0.123853	0.190335	0.49403	0.503311	ENCFF769VJF	CHIP:H3K36me3:C57BL/6 limb embryo (13.5 days)
83	0.275323	0.264217	0.0111064	0.181144	0.175069	0.00607523	0.0348184	0.124633	0.28411	0.603871	0.503304	ENCFF458SNJ	DNASE:C57BL/6 embryonic facial prominence embryo (10.50 days)
1514	3.71811	3.56644	0.151665	1.05169	1.03424	0.0174539	0.0349345	0.124777	0.0297686	0.169826	0.503301	CNhs11947	CAGE:Mouse Neurons - cortical,
1091	3.1146	2.90616	0.208437	1.04843	1.03574	0.0126865	0.0353737	0.126061	0.138719	0.422848	0.503291	ENCFF703RAT	CHIP:H3K36me3:C57BL/6 lung embryo (16.5 days)
741	2.41752	2.31557	0.101951	0.801337	0.790047	0.0112899	0.0354475	0.126061	0.147392	0.43147	0.503289	ENCFF132TLS	CHIP:H3K27ac:C57BL/6 kidney embryo (16.5 days)
1641	2.8298	2.57019	0.259606	0.761211	0.745145	0.0160666	0.0355954	0.126314	0.155092	0.445751	0.503285	CNhs14388	CAGE:natural helper cells, IL2 treated, day15, biol_, tech_rep3
543	2.80777	2.80163	0.00614047	0.746908	0.733599	0.0133085	0.0359912	0.127181	0.131773	0.409166	0.503276	ENCFF312WJP	CHIP:H3K4me3:C57BL/6 embryonic facial prominence embryo (14.5 days)
180	0.240531	0.227759	0.0127723	0.160537	0.155839	0.00469764	0.0360708	0.127181	0.233943	0.545977	0.503274	UW19.4	ATAC:Astrocytes-clusters_19-cluster_4
457	3.27066	3.11532	0.15534	1.05135	1.04015	0.0111924	0.0360835	0.127181	0.045883	0.224139	0.503274	ENCFF630JDA	CHIP:POLR2AphosphoS2:B10.H-2aH-4bp/Wts CH12.LX
539	2.42054	2.31192	0.108618	0.803999	0.788928	0.0150709	0.0361885	0.127181	0.130591	0.407611	0.503272	ENCFF774AQE	CHIP:H3K27ac:C57BL/6 hindbrain embryo (14.5 days)
1565	1.73873	1.67093	0.0678003	0.732136	0.720529	0.0116069	0.0362693	0.127181	0.0583563	0.256362	0.50327	CNhs13000	CAGE:cerebellum, embryo E16, biol_ (E16R1)
992	0.438023	0.439609	-0.00158626	0.334553	0.330576	0.00397635	0.0363042	0.127181	0.256792	0.576199	0.503269	ENCFF232UNC	CHIP:NANOG:129 E14TG2a.4
634	2.92704	2.80187	0.125178	1.06937	1.05892	0.0104437	0.036482	0.127532	0.076428	0.303312	0.503265	ENCFF795DAU	CHIP:H3K36me3:C57BL/6 neural tube embryo (15.5 days)
74	0.184791	0.181056	0.00373518	0.138533	0.134252	0.00428073	0.0368635	0.128396	0.116362	0.38808	0.503256	ENCFF363ULE	DNASE:C57BL/6 embryo embryo (9.50 days)
1094	3.92378	3.7463	0.177486	1.21621	1.20372	0.0124856	0.0368856	0.128396	0.0263326	0.157899	0.503256	ENCFF330KGP	CHIP:H3K36me3:C57BL/6 hindbrain embryo (13.5 days)
412	2.25115	2.10548	0.145666	0.652089	0.641715	0.0103741	0.0370548	0.128667	0.194107	0.499871	0.503252	ENCFF288OKN	CHIP:H3K4me3:B10.H-2aH-4bp/Wts CH12.LX
1075	3.12435	3.00382	0.120534	1.10618	1.09507	0.0111104	0.0371738	0.128667	0.186228	0.488774	0.503249	ENCFF446FGV	CHIP:H3K36me3:C57BL/6 midbrain postnatal (0 days)
711	2.02028	2.05811	-0.0378218	0.637961	0.628226	0.00973445	0.0372641	0.128667	0.12051	0.389242	0.503247	ENCFF627ZLA	CHIP:H3K4me3:C57BL/6 embryonic facial prominence embryo (11.5 days)
622	2.66458	2.65558	0.00899172	0.722352	0.709798	0.0125538	0.0372766	0.128667	0.155457	0.445751	0.503247	ENCFF994FKT	CHIP:H3K4me3:C57BL/6 limb embryo (14.5 days)
1054	2.2337	2.1576	0.0760984	0.845092	0.832313	0.0127786	0.0373723	0.128727	0.145045	0.430791	0.503245	ENCFF091TEN	CHIP:H3K4me1:C57BL/6 embryonic facial prominence embryo (10.5 days)
807	1.73847	1.70456	0.0339098	0.695133	0.681805	0.0133275	0.0382883	0.131606	0.14499	0.430791	0.503225	ENCFF534ANR	CHIP:H3K9ac:C57BL/6 limb embryo (13.5 days)
1609	1.24061	1.11117	0.129443	0.423115	0.414483	0.00863123	0.0385677	0.13229	0.14342	0.429999	0.503219	CNhs13217	CAGE:CD4+CD25-CD44- naive conventional T cells, pool1 (C57BL_6J)
1178	4.09387	4.04616	0.047708	0.912054	0.901351	0.0107032	0.0388391	0.132943	0.0705622	0.291219	0.503213	GSM1479732	CHIP:H3K27ac:H3K27ac ZT 10 Bmal1 KO / Liver, Bmal1 KO, ZT 10, H3K27ac ChIP / .
1543	0.840604	0.781686	0.0589184	0.341556	0.332666	0.00889057	0.0390011	0.13322	0.289602	0.607683	0.503209	CNhs12557	CAGE:Lgr5 positive intestinal stem cells, pool3
555	1.80864	1.80854	9.89437e-05	0.696823	0.68547	0.0113529	0.0392647	0.133773	0.264232	0.581168	0.503204	ENCFF565CYY	CHIP:H3K9ac:C57BL/6 midbrain embryo (16.5 days)
375	2.56757	2.3986	0.168969	0.902929	0.893454	0.00947595	0.0393718	0.133773	0.0571525	0.254476	0.503201	ENCFF911TSZ	CHIP:H3K36me3:C57BL/6 spleen male adult (8 weeks)
896	4.2514	3.95922	0.292178	1.21606	1.20187	0.0141858	0.0394073	0.133773	0.120113	0.389242	0.5032	ENCFF965EJR	CHIP:H3K36me3:C57BL/6 embryonic facial prominence embryo (14.5 days)
712	2.21769	2.12581	0.0918808	0.735259	0.720334	0.0149244	0.0399258	0.135254	0.137108	0.420237	0.503189	ENCFF527FOD	CHIP:H3K27ac:C57BL/6 forebrain embryo (14.5 days)
636	2.41421	2.26758	0.146634	0.7817	0.768336	0.0133641	0.0401013	0.135475	0.203949	0.509252	0.503186	ENCFF305IHU	CHIP:H3K27ac:C57BL/6 heart embryo (11.5 days)
610	2.22329	2.14371	0.0795839	0.771741	0.755934	0.015807	0.0401909	0.135475	0.0495374	0.235231	0.503184	ENCFF440LYR	CHIP:H3K27ac:C57BL/6 embryonic facial prominence embryo (10.5 days)
55	0.229271	0.22008	0.00919144	0.155916	0.149808	0.00610808	0.0402384	0.135475	0.129602	0.407071	0.503183	ENCFF888LAZ	DNASE:C57BL/6 hindbrain embryo (10.50 days)
989	2.80683	2.66633	0.140503	1.02061	1.0089	0.0117041	0.0406203	0.136481	0.150899	0.439587	0.503175	ENCFF713BVE	CHIP:H3K36me3:C57BL/6 neural tube embryo (14.5 days)
947	2.59146	2.66671	-0.0752439	0.696244	0.687824	0.00842041	0.0413572	0.138673	0.100607	0.357012	0.50316	ENCFF293PAY	CHIP:H3K4me3:C57BL/6 neural tube embryo (13.5 days)
964	2.22412	2.30946	-0.0853372	0.648756	0.640058	0.00869769	0.0416816	0.139308	0.31134	0.620284	0.503153	ENCFF880ZZM	CHIP:H3K4me3:C57BL/6 forebrain embryo (11.5 days)
824	2.16363	2.06951	0.0941184	0.907024	0.89821	0.00881439	0.0417159	0.139308	0.192274	0.495927	0.503152	ENCFF565NEA	CHIP:H3K36me3:C57BL/6 midbrain embryo (15.5 days)
1619	0.703331	0.657262	0.0460693	0.295888	0.288369	0.00751907	0.0420274	0.139835	0.164517	0.462055	0.503146	CNhs13233	CAGE:CD326+ enterocyte isolated from mice, treated with RANKL, day03, pool2
490	2.31758	2.19319	0.124397	0.77461	0.76553	0.00907981	0.0420442	0.139835	0.100161	0.357008	0.503146	ENCFF128VVT	CHIP:POLR2A:DBA/2 MEL cell line treated with 2% dimethyl sulfoxide for 5 days
588	3.41653	3.19988	0.21665	1.10486	1.09252	0.0123469	0.0423742	0.140648	0.0694528	0.290241	0.503139	ENCFF069GVS	CHIP:H3K36me3:C57BL/6 kidney embryo (16.5 days)
189	0.227626	0.217464	0.0101625	0.150803	0.146439	0.00436366	0.042548	0.140652	0.0276719	0.164456	0.503135	UW23.1	ATAC:Endothelial_II_cells-clusters_23-cluster_1
618	2.57555	2.65522	-0.0796704	0.693625	0.685706	0.00791919	0.0425916	0.140652	0.117354	0.389242	0.503135	ENCFF842FSB	CHIP:H3K4me3:C57BL/6 midbrain embryo (13.5 days)
1586	0.672104	0.651001	0.0211024	0.418122	0.410244	0.00787759	0.0428461	0.140652	0.0874078	0.328629	0.503129	CNhs13021	CAGE:cerebellum, embryo E18, biol_ (E18R3)
909	2.56801	2.66945	-0.101434	0.663705	0.656078	0.00762796	0.042866	0.140652	0.257063	0.576199	0.503129	ENCFF644PLR	CHIP:H3K4me3:C57BL/6 midbrain embryo (16.5 days)
1012	1.81243	1.76433	0.0481018	0.790287	0.779658	0.0106292	0.0428801	0.140652	0.243862	0.559588	0.503129	ENCFF555JQE	CHIP:H3K4me1:C57BL/6 neural tube embryo (15.5 days)
959	1.29702	1.29321	0.00380981	0.586609	0.575704	0.0109048	0.0428889	0.140652	0.190178	0.49403	0.503129	ENCFF923XEA	CHIP:H3K9ac:C57BL/6 hindbrain embryo (11.5 days)
650	4.97335	4.62288	0.350473	1.23333	1.21964	0.0136918	0.0436753	0.142578	0.089176	0.33201	0.503113	ENCFF918CGY	CHIP:H3K36me3:C57BL/6 limb embryo (10.5 days)
935	1.81573	1.75989	0.0558381	0.78227	0.770903	0.0113666	0.0437014	0.142578	0.178376	0.482025	0.503112	ENCFF298SER	CHIP:H3K4me1:C57BL/6 midbrain embryo (16.5 days)
976	3.00905	3.02374	-0.014694	0.745574	0.733102	0.012472	0.0437366	0.142578	0.222869	0.536125	0.503112	ENCFF374BEH	CHIP:H3K4me2:C57BL/6 midbrain embryo (14.5 days)
602	2.8929	2.74099	0.151904	0.839681	0.826899	0.0127819	0.0441954	0.143788	0.252205	0.570761	0.503103	ENCFF681GAF	CHIP:H3K27ac:C57BL/6 lung embryo (16.5 days)
744	3.31282	3.1028	0.21002	0.887305	0.87258	0.0147244	0.0448461	0.145617	0.283878	0.603871	0.50309	ENCFF689PCR	CHIP:H3K27ac:C57BL/6 heart embryo (14.5 days)
904	1.47102	1.45235	0.0186706	0.631853	0.619518	0.0123347	0.0451067	0.146174	0.120864	0.389242	0.503085	ENCFF750BCM	CHIP:H3K9ac:C57BL/6 limb embryo (12.5 days)
270	3.11629	3.01158	0.104712	1.03386	1.02045	0.0134147	0.0455837	0.147245	0.303505	0.620284	0.503076	ENCFF323UQU	CHIP:POLR2AphosphoS2:C3H myocyte originated from C2C12
855	2.35531	2.32976	0.0255508	0.680754	0.667367	0.0133868	0.0456165	0.147245	0.250254	0.568364	0.503075	ENCFF323VNT	CHIP:H3K4me2:C57BL/6 hindbrain embryo (12.5 days)
80	0.229839	0.223422	0.00641701	0.157487	0.152646	0.00484011	0.0459864	0.147652	0.355861	0.656573	0.503068	ENCFF610ONZ	DNASE:C57BL/6 midbrain postnatal (0 days)
1638	0.100967	0.0944405	0.00652664	0.0671153	0.065094	0.00202131	0.0460213	0.147652	0.136688	0.419772	0.503068	CNhs14333	CAGE:natural helper cells, naive, biol_, tech_rep2
645	2.17893	2.11109	0.0678382	0.836524	0.824523	0.0120007	0.046028	0.147652	0.180808	0.485578	0.503068	ENCFF920CEX	CHIP:H3K4me1:C57BL/6 limb embryo (10.5 days)
1438	2.62619	2.521	0.105192	0.895952	0.884962	0.01099	0.0461105	0.147652	0.223479	0.536807	0.503066	CNhs11110	CAGE:testis, neonate N20
1043	0.880875	0.852852	0.0280231	0.492034	0.482299	0.00973505	0.0462513	0.147652	0.200095	0.505779	0.503063	ENCFF704GSX	CHIP:H3K27ac:C57BL/6 neural tube embryo (12.5 days)
705	1.33654	1.34036	-0.00381207	0.599654	0.589486	0.0101681	0.0462815	0.147652	0.183801	0.487644	0.503063	ENCFF909MUJ	CHIP:H3K9ac:C57BL/6 midbrain embryo (12.5 days)
1111	2.34636	2.26338	0.0829844	0.839482	0.827273	0.0122089	0.0463723	0.147654	0.110036	0.377327	0.503061	ENCFF739NQW	CHIP:H3K4me1:C57BL/6 forebrain embryo (10.5 days)
41	0.305979	0.289108	0.0168713	0.18026	0.175163	0.00509702	0.0466766	0.147756	0.328834	0.634533	0.503055	ENCFF992QCB	DNASE:C57BL/6 brain male embryo (14.5 days)
1066	2.60451	2.61781	-0.0133016	0.727357	0.716194	0.0111629	0.0467047	0.147756	0.171767	0.47067	0.503055	ENCFF840MYF	CHIP:H3K4me3:C57BL/6 limb embryo (12.5 days)
810	2.27952	2.29083	-0.0113072	0.689472	0.680314	0.00915754	0.0467533	0.147756	0.197496	0.50206	0.503054	ENCFF751FCH	CHIP:H3K4me3:C57BL/6 intestine embryo (14.5 days)
1167	3.09881	3.00163	0.0971766	0.945018	0.933544	0.0114741	0.0467992	0.147756	0.196555	0.50206	0.503053	GSM1479721	CHIP:PolII:PolII ZT 22 Bmal1 KO / Liver, Bmal1 KO, ZT 22, PolII ChIP / .
1531	1.10401	0.995088	0.108924	0.412398	0.400389	0.0120091	0.0468538	0.147756	0.116448	0.38808	0.503052	CNhs12515	CAGE:natural helper cells, naive, biol_, tech_rep1
1209	0.745433	0.782848	-0.0374147	0.517098	0.516213	0.000885308	0.0473859	0.149148	0.10369	0.361418	0.503042	GSM2390532	CHIP:.:ChIP-seq Rpc4 , ZT02, rep1, CONSTANTLY FED / Liver / .
945	4.10566	3.89659	0.209069	1.21776	1.20449	0.0132663	0.0475245	0.149298	0.104488	0.361418	0.50304	ENCFF997AJH	CHIP:H3K36me3:C57BL/6 midbrain embryo (14.5 days)
561	1.57273	1.56178	0.0109462	0.650304	0.63775	0.0125542	0.0477955	0.149863	0.0905981	0.335254	0.503035	ENCFF170JVA	CHIP:H3K9ac:C57BL/6 embryonic facial prominence embryo (11.5 days)
1045	2.69997	2.56865	0.131324	0.814992	0.803519	0.0114735	0.0484285	0.151347	0.133419	0.412045	0.503023	ENCFF018LWM	CHIP:H3K27ac:C57BL/6 lung embryo (15.5 days)
1602	0.610866	0.575418	0.0354484	0.275359	0.268914	0.0064452	0.0484824	0.151347	0.395	0.6966	0.503022	CNhs13197	CAGE:CD326+ enterocyte, pool2
617	1.27374	1.28468	-0.0109429	0.583284	0.574199	0.00908488	0.0485454	0.151347	0.170204	0.47067	0.503021	ENCFF111SQJ	CHIP:H3K9ac:C57BL/6 forebrain embryo (12.5 days)
582	3.92136	3.72843	0.192923	1.20712	1.19511	0.0120096	0.0487765	0.15178	0.0836292	0.319541	0.503017	ENCFF032KOM	CHIP:H3K36me3:C57BL/6 neural tube embryo (13.5 days)
632	2.47349	2.55041	-0.0769179	0.673928	0.66424	0.00968802	0.0490466	0.152332	0.342976	0.647739	0.503012	ENCFF002MTC	CHIP:H3K4me3:C57BL/6 midbrain embryo (14.5 days)
1058	1.75317	1.70534	0.0478395	0.776133	0.765465	0.0106686	0.0495044	0.152347	0.286634	0.60532	0.503004	ENCFF632RYE	CHIP:H3K4me1:C57BL/6 hindbrain embryo (15.5 days)
547	1.19764	1.2044	-0.00675905	0.565246	0.556393	0.00885332	0.0495045	0.152347	0.258364	0.577541	0.503004	ENCFF999AED	CHIP:H3K9ac:C57BL/6 neural tube embryo (12.5 days)
1589	0.895997	0.860419	0.0355778	0.515576	0.505586	0.0099901	0.049617	0.152347	0.12922	0.407071	0.503002	CNhs13025	CAGE:cerebellum, neonate N06, biol_ (P6R3)
255	1.03803	1.01233	0.0256939	0.541092	0.534784	0.0063076	0.0496439	0.152347	0.225437	0.537753	0.503001	ENCFF891VZV	CHIP:MYOG:C3H myocyte originated from C2C12
605	1.283	1.27902	0.00397778	0.506792	0.501799	0.0049935	0.0497653	0.152347	0.137455	0.420237	0.502999	ENCFF083ZQN	CHIP:CTCF:C57BL/6 kidney postnatal (0 days)
1169	3.75702	3.72849	0.0285335	0.949833	0.940799	0.00903416	0.049855	0.152347	0.224974	0.537753	0.502998	GSM1479723	CHIP:H3K27ac:H3K27ac ZT 2 WT / Liver, WT, ZT 2, H3K27ac ChIP / .
672	2.59429	2.4299	0.164391	0.954724	0.943238	0.0114863	0.0498959	0.152347	0.349653	0.652818	0.502997	ENCFF849QJF	CHIP:H3K36me3:C57BL/6 limb embryo (15.5 days)
580	1.16634	1.15473	0.0116092	0.560459	0.549488	0.010971	0.0499449	0.152347	0.142486	0.429265	0.502996	ENCFF499LGL	CHIP:H3K9ac:C57BL/6 embryonic facial prominence embryo (12.5 days)
719	0.834087	0.824298	0.00978965	0.477505	0.46951	0.0079948	0.0499506	0.152347	0.077399	0.304956	0.502996	ENCFF641CTW	CHIP:H3K9ac:C57BL/6 limb embryo (15.5 days)
787	2.21655	2.11615	0.100397	0.75998	0.744946	0.0150343	0.0500574	0.152347	0.0539822	0.245401	0.502994	ENCFF826KEG	CHIP:H3K27ac:C57BL/6 forebrain embryo (16.5 days)
33	0.245968	0.237701	0.00826667	0.156651	0.152154	0.00449754	0.0500715	0.152347	0.418628	0.717424	0.502994	ENCFF908NIP	DNASE:C57BL/6 retina male postnatal (7 days)
825	3.1162	2.98534	0.13086	0.792493	0.779789	0.0127044	0.0502232	0.152514	0.196881	0.50206	0.502991	ENCFF064NXP	CHIP:H3K4me2:C57BL/6 limb embryo (12.5 days)
953	2.53692	2.43666	0.100254	0.828338	0.817664	0.0106741	0.0503121	0.152514	0.29537	0.613517	0.50299	ENCFF297RMH	CHIP:H3K27ac:C57BL/6 kidney embryo (15.5 days)
75	0.268278	0.255425	0.012853	0.173431	0.167034	0.00639772	0.0506142	0.153148	0.127253	0.40356	0.502984	ENCFF894XDN	DNASE:C57BL/6 embryo embryo (10 days)
1162	4.57045	4.41947	0.150982	1.15065	1.13879	0.0118632	0.0508484	0.153573	0.303926	0.620284	0.50298	GSM1479716	CHIP:PolII:PolII ZT 2 Bmal1 KO / Liver, Bmal1 KO, ZT 2, PolII ChIP / .
1177	2.28531	2.25585	0.0294552	0.74138	0.732513	0.00886637	0.0510799	0.153809	0.126485	0.401963	0.502976	GSM1479731	CHIP:H3K27ac:H3K27ac ZT 6 Bmal1 KO / Liver, Bmal1 KO, ZT 6, H3K27ac ChIP / .
533	2.88081	2.88222	-0.00140595	0.749845	0.736527	0.0133179	0.0511137	0.153809	0.184749	0.487644	0.502976	ENCFF849CQA	CHIP:H3K4me2:C57BL/6 forebrain embryo (13.5 days)
819	0.683963	0.677424	0.00653899	0.423134	0.418288	0.00484589	0.0512162	0.153836	0.100388	0.357008	0.502974	ENCFF419ZKE	CHIP:H3K9ac:C57BL/6 stomach embryo (15.5 days)
860	1.35147	1.35521	-0.00374246	0.59727	0.585356	0.0119142	0.0515731	0.154625	0.0842785	0.320532	0.502968	ENCFF358FNS	CHIP:H3K9ac:C57BL/6 neural tube embryo (11.5 days)
975	0.770333	0.76139	0.00894368	0.456596	0.449626	0.00697023	0.0526382	0.157531	0.302935	0.620284	0.50295	ENCFF055NHC	CHIP:H3K9ac:C57BL/6 embryonic facial prominence embryo (15.5 days)
17	0.248112	0.240073	0.00803849	0.167073	0.16153	0.0055422	0.0529596	0.158205	0.226758	0.539947	0.502944	ENCFF227XDD	DNASE:CD-1 embryo male embryo (11.5 days) depleted in head
603	2.20065	2.10992	0.09073	0.762728	0.75279	0.00993788	0.0530957	0.158324	0.260354	0.578626	0.502942	ENCFF873EBR	CHIP:H3K27ac:C57BL/6 kidney postnatal (0 days)
1569	0.978093	0.925944	0.0521491	0.483959	0.474002	0.00995651	0.053412	0.158978	0.0368765	0.190528	0.502937	CNhs13004	CAGE:cerebellum, embryo E13, biol_ (E13R2)
57	0.25575	0.247459	0.00829107	0.16379	0.158183	0.0056074	0.0536739	0.159272	0.0883775	0.33001	0.502932	ENCFF649UQO	DNASE:C57BL/6 neural tube embryo (11.5 days)
544	4.67529	4.48433	0.190967	1.3105	1.29609	0.0144091	0.0537047	0.159272	0.406833	0.705837	0.502932	ENCFF012GHA	CHIP:H3K27me3:129 E14TG2a.4
585	2.5473	2.63624	-0.0889406	0.673452	0.664548	0.00890386	0.0542861	0.160424	0.169693	0.47067	0.502922	ENCFF959NHK	CHIP:H3K4me3:C57BL/6 hindbrain embryo (16.5 days)
374	3.49246	3.27482	0.217638	1.06495	1.05463	0.0103245	0.0543688	0.160424	0.326948	0.633461	0.502921	ENCFF204STH	CHIP:H3K36me3:C57BL/6 small intestine male adult (8 weeks)
1549	5.28526	5.15311	0.132156	1.10296	1.08647	0.0164905	0.0543859	0.160424	0.072742	0.294372	0.50292	CNhs14553	CAGE:Mouse hepatocyte,
960	4.90177	4.68476	0.217004	1.21266	1.20186	0.0108058	0.0545746	0.160692	0.343384	0.647739	0.502917	ENCFF063ZLI	CHIP:H3K27me3:C57BL/6 forebrain embryo (10.5 days)
803	3.49934	3.2598	0.239545	1.09404	1.08208	0.0119619	0.0547269	0.160814	0.23869	0.55391	0.502915	ENCFF952ZFO	CHIP:H3K36me3:C57BL/6 kidney embryo (15.5 days)
1279	6.45916	6.15422	0.304931	1.33801	1.3278	0.0102147	0.054816	0.160814	0.147488	0.43147	0.502913	GSM874964	CHIP:H3K36me3:H3K36me3_ZT02 / H3K36me3 IP / .
470	0.377612	0.374903	0.0027082	0.295875	0.291912	0.00396335	0.0549471	0.160814	0.467906	0.749289	0.502911	ENCFF550KLM	CHIP:ZC3H11A:129 ES-E14
806	2.5463	2.43464	0.111667	0.991454	0.981495	0.00995874	0.0550075	0.160814	0.231709	0.544632	0.50291	ENCFF562BME	CHIP:H3K36me3:C57BL/6 hindbrain postnatal (0 days)
1456	4.03418	3.88831	0.145876	1.03339	1.02315	0.0102388	0.0551758	0.161019	0.278563	0.598658	0.502907	CNhs11130	CAGE:testis, neonate N30
1553	7.05153	6.83724	0.214291	1.52978	1.5135	0.0162776	0.0561601	0.163331	0.025439	0.155377	0.502891	CNhs12619	CAGE:Mouse Neurons - raphe,
178	0.317193	0.299816	0.0173768	0.201695	0.195216	0.00647891	0.0561666	0.163331	0.0917094	0.337844	0.502891	UW19.2	ATAC:Astrocytes-clusters_19-cluster_2
898	2.4094	2.2592	0.150201	0.924809	0.914144	0.0106645	0.0564573	0.163886	0.319499	0.623441	0.502887	ENCFF464IYE	CHIP:H3K36me3:C57BL/6 embryonic facial prominence embryo (15.5 days)
795	3.35279	3.14107	0.211721	1.08515	1.07314	0.0120193	0.0571651	0.165648	0.144892	0.430791	0.502875	ENCFF350KKE	CHIP:H3K36me3:C57BL/6 embryonic facial prominence embryo (13.5 days)
994	1.69393	1.66462	0.0293021	0.689137	0.675439	0.0136982	0.0577565	0.167067	0.0596281	0.259177	0.502866	ENCFF582THV	CHIP:H3K9ac:C57BL/6 embryonic facial prominence embryo (13.5 days)
1179	2.11448	2.0962	0.0182717	0.781853	0.773844	0.00800902	0.0582964	0.168332	0.0525106	0.242345	0.502857	GSM1479733	CHIP:H3K27ac:H3K27ac ZT 14 Bmal1 KO / Liver, Bmal1 KO, ZT 14, H3K27ac ChIP / .
956	1.49261	1.48267	0.00993896	0.65898	0.647999	0.0109808	0.0585603	0.168798	0.219109	0.529685	0.502853	ENCFF638WTR	CHIP:H3K9ac:C57BL/6 hindbrain postnatal (0 days)
1631	0.0165382	0.0187764	-0.00223825	0.0155239	0.0148082	0.000715641	0.0591052	0.17	0.0791444	0.30887	0.502845	CNhs14147	CAGE:Neurons - spiral ganglion, pool1
50	0.322398	0.311972	0.0104255	0.197416	0.193138	0.00427863	0.0592517	0.17	0.229295	0.543623	0.502843	ENCFF417SAZ	DNASE:C57BL/6 lung postnatal (0 days)
338	0.933158	0.924166	0.00899148	0.578025	0.572361	0.00566393	0.059288	0.17	0.39563	0.696698	0.502842	ENCFF193PLE	CHIP:POLR2A:C57BL/6 olfactory bulb male adult (8 weeks)
710	2.92443	2.94193	-0.0174994	0.811227	0.800257	0.0109695	0.0593946	0.170009	0.2082	0.514394	0.50284	ENCFF563HQA	CHIP:H3K4me3:C57BL/6 limb embryo (10.5 days)
1077	3.75634	3.45419	0.302145	1.08853	1.07441	0.0141201	0.0598321	0.170964	0.111368	0.378225	0.502834	ENCFF224DGI	CHIP:H3K36me3:C57BL/6 intestine embryo (14.5 days)
706	2.69183	2.68481	0.00702477	0.714226	0.700995	0.013231	0.0606214	0.1729	0.400331	0.700262	0.502822	ENCFF152HAY	CHIP:H3K4me2:C57BL/6 midbrain embryo (16.5 days)
226	0.247112	0.236432	0.0106797	0.15882	0.155075	0.00374489	0.0607258	0.1729	0.170962	0.47067	0.50282	UW9.2	ATAC:Endothelial_II_cells-clusters_9-cluster_2
1036	1.7469	1.69581	0.0510882	0.753077	0.741596	0.0114809	0.0609325	0.1729	0.215545	0.526667	0.502817	ENCFF059NRZ	CHIP:H3K4me1:C57BL/6 forebrain embryo (15.5 days)
952	3.2871	3.19253	0.0945699	1.1029	1.09219	0.0107166	0.0610287	0.1729	0.199813	0.505779	0.502816	ENCFF779RNO	CHIP:H3K27me3:C57BL/6 limb embryo (13.5 days)
45	0.268293	0.260762	0.0075306	0.189253	0.185864	0.00338897	0.061036	0.1729	0.216693	0.526667	0.502815	ENCFF448ZJM	DNASE:129 ZHBTc4-mESC treated with 100 ng/mL doxycycline hyclate for 24 hours
674	1.94325	1.86608	0.0771765	0.727375	0.71402	0.0133551	0.0614033	0.173453	0.161342	0.457176	0.50281	ENCFF494OOQ	CHIP:H3K27ac:C57BL/6 neural tube embryo (14.5 days)
520	2.18447	2.1888	-0.0043292	0.670894	0.661658	0.00923592	0.0615348	0.173453	0.157526	0.450114	0.502808	ENCFF280VOA	CHIP:H3K4me3:C57BL/6 stomach embryo (14.5 days)
569	2.27946	2.3522	-0.0727439	0.672231	0.663912	0.00831997	0.0616046	0.173453	0.273772	0.595102	0.502807	ENCFF229GJB	CHIP:H3K4me3:C57BL/6 neural tube embryo (14.5 days)
1435	1.75305	1.68098	0.0720755	0.708887	0.698753	0.0101346	0.0616536	0.173453	0.0156013	0.117046	0.502806	CNhs11107	CAGE:cortex, neonate N30
600	2.20576	2.01454	0.191216	0.731827	0.720902	0.0109244	0.0618043	0.17358	0.369426	0.669203	0.502804	ENCFF285ZJD	CHIP:H3K27ac:C57BL/6 liver embryo (12.5 days)
890	2.54859	2.43542	0.113167	0.845915	0.835199	0.0107163	0.0621495	0.173989	0.396708	0.697104	0.502799	ENCFF222TEU	CHIP:H3K27ac:C57BL/6 heart embryo (10.5 days)
1165	3.09893	3.01245	0.0864763	0.960797	0.950461	0.0103363	0.0621615	0.173989	0.373778	0.671901	0.502799	GSM1479719	CHIP:PolII:PolII ZT 14 Bmal1 KO / Liver, Bmal1 KO, ZT 14, PolII ChIP / .
707	2.57477	2.63895	-0.0641828	0.695654	0.687277	0.00837672	0.0623819	0.174187	0.141935	0.428674	0.502795	ENCFF356LUU	CHIP:H3K4me3:C57BL/6 hindbrain embryo (13.5 days)
1166	4.41839	4.28255	0.135841	1.14114	1.12971	0.011433	0.0624443	0.174187	0.35646	0.656573	0.502794	GSM1479720	CHIP:PolII:PolII ZT 18 Bmal1 KO / Liver, Bmal1 KO, ZT 18, PolII ChIP / .
620	2.5374	2.30709	0.230307	0.773938	0.762776	0.011162	0.0627117	0.174636	0.321371	0.62635	0.50279	ENCFF289PYS	CHIP:H3K27ac:C57BL/6 liver embryo (13.5 days)
1180	3.96902	3.92333	0.0456867	0.908857	0.898542	0.0103149	0.0630256	0.175213	0.127479	0.40356	0.502786	GSM1479734	CHIP:H3K27ac:H3K27ac ZT 18 Bmal1 KO / Liver, Bmal1 KO, ZT 18, H3K27ac ChIP / .
750	2.2327	2.21274	0.0199513	0.688005	0.675996	0.012009	0.0636739	0.176717	0.215853	0.526667	0.502776	ENCFF558KHU	CHIP:H3K4me2:C57BL/6 neural tube embryo (12.5 days)
68	0.212437	0.205285	0.0071518	0.150238	0.146821	0.00341649	0.0651625	0.180543	0.301463	0.620284	0.502755	ENCFF802BPW	DNASE:C57BL/6 limb embryo (14.5 days)
629	2.23594	2.15172	0.0842273	0.682771	0.670698	0.0120732	0.0655934	0.181431	0.422866	0.720715	0.502749	ENCFF877WYE	CHIP:H3K4me2:C57BL/6 embryonic facial prominence embryo (12.5 days)
722	2.38344	2.46814	-0.0846977	0.677366	0.66929	0.00807577	0.0657436	0.181541	0.119522	0.389242	0.502746	ENCFF576SVQ	CHIP:H3K4me3:C57BL/6 hindbrain embryo (15.5 days)
657	2.70407	2.56652	0.137547	0.693263	0.68267	0.0105931	0.0667006	0.183874	0.457881	0.742644	0.502733	ENCFF315VST	CHIP:H3K4me3:C57BL/6 liver embryo (16.5 days)
326	3.12247	3.0712	0.0512764	0.88817	0.877848	0.0103223	0.0668876	0.184081	0.171108	0.47067	0.50273	ENCFF387JGJ	CHIP:H3K27ac:C57BL/6 embryonic fibroblast male embryo (13.5 weeks)
973	1.72072	1.67448	0.04624	0.701359	0.69039	0.0109688	0.0671015	0.184361	0.166469	0.463821	0.502727	ENCFF702AEO	CHIP:H3K9ac:C57BL/6 heart embryo (11.5 days)
509	3.34991	3.15746	0.192451	0.999439	0.985632	0.0138072	0.0677054	0.185709	0.108898	0.375093	0.502719	ENCFF906BFI	CHIP:POLR2A:DBA/2 MEL cell line
913	4.94207	4.55968	0.382386	1.25424	1.23982	0.0144138	0.0682142	0.186793	0.260779	0.578626	0.502712	ENCFF152GZF	CHIP:H3K36me3:C57BL/6 heart embryo (14.5 days)
49	0.230648	0.223273	0.00737506	0.164167	0.161056	0.00311157	0.0684619	0.18716	0.155442	0.445751	0.502708	ENCFF299KAN	DNASE:C57BL/6 kidney postnatal (0 days)
1019	3.64834	3.42019	0.228148	1.14403	1.13142	0.012612	0.0693242	0.189202	0.151232	0.439632	0.502697	ENCFF906TTD	CHIP:H3K36me3:C57BL/6 heart embryo (12.5 days)
663	1.95469	1.89359	0.0611038	0.811446	0.79969	0.0117563	0.0698551	0.190335	0.282158	0.602841	0.502689	ENCFF667NCZ	CHIP:H3K4me1:C57BL/6 hindbrain embryo (16.5 days)
934	0.947048	0.950791	-0.00374299	0.4182	0.414017	0.00418326	0.0703189	0.191281	0.250454	0.568364	0.502683	ENCFF176KNA	CHIP:CTCF:C57BL/6 lung embryo (14.5 days)
888	2.76115	2.55253	0.208617	0.94761	0.935122	0.0124879	0.0704579	0.191343	0.5094	0.76908	0.502681	ENCFF450GMP	CHIP:H3K36me3:C57BL/6 stomach embryo (14.5 days)
194	0.179667	0.174141	0.00552601	0.128191	0.125944	0.00224687	0.0712104	0.193067	0.231439	0.544632	0.502671	UW25.2	ATAC:Endothelial_II_cells-clusters_25-cluster_2
857	1.69914	1.74693	-0.0477941	0.604698	0.596461	0.00823712	0.071367	0.193173	0.261152	0.578626	0.502669	ENCFF552KFS	CHIP:H3K4me3:C57BL/6 neural tube embryo (12.5 days)
781	3.31183	3.05285	0.258971	1.0183	1.00485	0.0134552	0.0716106	0.193514	0.22456	0.537753	0.502666	ENCFF133NGW	CHIP:H3K36me3:C57BL/6 kidney embryo (14.5 days)
19	0.201692	0.193662	0.00802994	0.146554	0.142145	0.00440848	0.0718512	0.193845	0.177683	0.481696	0.502662	ENCFF037VPV	DNASE:CD-1 hindlimb bud male embryo (11.5 days)
414	5.13036	4.81754	0.312821	1.2354	1.22291	0.0124881	0.0721798	0.194326	0.13958	0.423771	0.502658	ENCFF601MZE	CHIP:H3K36me3:B10.H-2aH-4bp/Wts CH12.LX
395	1.45878	1.44704	0.0117408	0.707162	0.70249	0.00467187	0.072266	0.194326	0.288374	0.607433	0.502657	ENCFF609ZSZ	CHIP:H3K9ac:C57BL/6 ES-Bruce4
227	0.279182	0.266955	0.012227	0.181037	0.175951	0.00508562	0.072439	0.194473	0.355568	0.656573	0.502655	UW9.3	ATAC:Endothelial_II_cells-clusters_9-cluster_3
1065	2.40419	2.23851	0.165674	0.908029	0.896441	0.0115876	0.0727245	0.194921	0.195643	0.50206	0.502651	ENCFF559KOX	CHIP:H3K36me3:C57BL/6 liver embryo (11.5 days)
619	2.42454	2.50432	-0.0797813	0.663764	0.654715	0.00904912	0.0736425	0.19706	0.224932	0.537753	0.502639	ENCFF465QRZ	CHIP:H3K4me3:C57BL/6 forebrain embryo (14.5 days)
1545	1.31677	1.18517	0.131596	0.454634	0.442046	0.0125877	0.07422	0.19772	0.102433	0.360668	0.502631	CNhs12578	CAGE:natural helper cells, IL33 treated, day02, biol_, tech_rep1
466	3.35485	3.18718	0.167666	0.996241	0.98623	0.0100107	0.0742457	0.19772	0.27455	0.595886	0.502631	ENCFF847BNC	CHIP:POLR2A:B10.H-2aH-4bp/Wts CH12.LX
836	1.39147	1.38958	0.00188935	0.603631	0.594804	0.00882769	0.0742505	0.19772	0.310576	0.620284	0.502631	ENCFF258NLM	CHIP:H3K9ac:C57BL/6 neural tube embryo (14.5 days)
198	0.148917	0.146058	0.00285931	0.123871	0.12137	0.00250074	0.0751889	0.199896	0.244522	0.560319	0.502619	UW26.3	ATAC:Collisions-clusters_26-cluster_3
1285	6.45665	6.14993	0.306721	1.33065	1.32035	0.0102978	0.0756169	0.200392	0.365152	0.665771	0.502613	GSM874970	CHIP:H3K36me3:H3K36me3_ZT26 / H3K36me3 IP / .
877	1.12285	1.12863	-0.0057801	0.555519	0.547708	0.00781143	0.0757142	0.200392	0.23321	0.545786	0.502612	ENCFF197IGU	CHIP:H3K9ac:C57BL/6 neural tube embryo (15.5 days)
1035	2.31258	2.17138	0.141192	0.919791	0.910314	0.00947702	0.0757416	0.200392	0.347881	0.650989	0.502612	ENCFF454YLV	CHIP:H3K36me3:C57BL/6 stomach embryo (16.5 days)
1546	1.33204	1.21913	0.112918	0.475407	0.466822	0.00858524	0.0759877	0.20072	0.236291	0.549895	0.502609	CNhs12579	CAGE:natural helper cells, IL33 treated, 01hr, biol_, tech_
906	2.62692	2.45894	0.167982	0.972195	0.961392	0.0108026	0.0764713	0.201673	0.298766	0.616919	0.502603	ENCFF477XJO	CHIP:H3K36me3:C57BL/6 heart embryo (11.5 days)
861	1.51689	1.4677	0.0491862	0.690995	0.681058	0.00993699	0.0766535	0.20183	0.179273	0.483654	0.5026	ENCFF956BOI	CHIP:H3K4me1:C57BL/6 limb embryo (11.5 days)
179	0.321779	0.305899	0.0158795	0.206633	0.200278	0.0063542	0.0777865	0.204485	0.20296	0.508327	0.502586	UW19.3	ATAC:Astrocytes-clusters_19-cluster_3
58	0.252918	0.246712	0.00620572	0.185357	0.181941	0.00341523	0.0784322	0.205853	0.367625	0.667412	0.502578	ENCFF729TAB	DNASE:C57BL/6 R1
1188	0.203798	0.204942	-0.00114374	0.17898	0.1789	8.04216e-05	0.0789565	0.206803	0.288807	0.607567	0.502571	GSM1659685	CHIP:.:input_brain / brain(ventral tegmental area) / .
195	0.285596	0.277061	0.00853458	0.176922	0.174307	0.00261515	0.0790457	0.206803	0.175931	0.479361	0.50257	UW25.3	ATAC:Endothelial_II_cells-clusters_25-cluster_3
417	0.759363	0.726623	0.0327407	0.470363	0.465125	0.005238	0.079568	0.20779	0.165323	0.46211	0.502564	ENCFF398WUM	CHIP:POLR2AphosphoS5:DBA/2 MEL cell line
379	2.78021	2.61177	0.168433	0.954671	0.94642	0.00825131	0.0797277	0.20779	0.242526	0.557302	0.502562	ENCFF198YXO	CHIP:H3K36me3:C57BL/6 splenic B cell male adult (8 weeks)
583	3.74654	3.46183	0.28471	1.1008	1.08781	0.0129865	0.0798706	0.20779	0.494262	0.761794	0.50256	ENCFF118BRC	CHIP:H3K36me3:C57BL/6 lung embryo (14.5 days)
1237	4.45934	4.34214	0.117204	1.17495	1.16433	0.0106245	0.0801208	0.20779	0.338527	0.644056	0.502557	GSM647031	CHIP:.:Pol II ChIP at ZT10 / Liver / .
301	0.628623	0.631411	-0.00278783	0.415216	0.411314	0.00390163	0.0801547	0.20779	0.356406	0.656573	0.502557	ENCFF432JCZ	CHIP:CTCF:C57BL/6 embryonic fibroblast male embryo (13.5 weeks)
1102	1.52196	1.48186	0.0400994	0.709193	0.698981	0.0102114	0.080182	0.20779	0.147587	0.43147	0.502556	ENCFF127DNN	CHIP:H3K4me1:C57BL/6 neural tube embryo (14.5 days)
788	2.10158	2.04788	0.0536971	0.749823	0.739185	0.0106376	0.0805276	0.208357	0.437015	0.733943	0.502552	ENCFF163DQS	CHIP:H3K9ac:C57BL/6 lung embryo (16.5 days)
89	0.264234	0.253255	0.0109787	0.176411	0.171899	0.00451222	0.0811219	0.209558	0.216094	0.526667	0.502545	ENCFF580UUE	DNASE:C57BL/6 embryonic facial prominence embryo (14.5 days)
52	0.188941	0.18313	0.00581069	0.134316	0.130284	0.00403261	0.0812467	0.209558	0.445795	0.736122	0.502543	ENCFF107NBQ	DNASE:C57BL/6 hindbrain embryo (14.5 days)
1544	2.73596	2.49069	0.245267	0.758733	0.744185	0.0145483	0.0815204	0.209934	0.0787467	0.30805	0.50254	CNhs14389	CAGE:natural helper cells, IL2 treated, day15, biol_, tech_
1323	4.13227	3.99533	0.13694	1.01778	1.00695	0.0108289	0.081917	0.210625	0.0484966	0.233345	0.502535	CNhs10504	CAGE:testis, adult
1229	0.34892	0.338928	0.00999278	0.250669	0.24626	0.00440861	0.0826783	0.212251	0.0656599	0.277324	0.502526	GSM3212798	CHIP:RNA:RNAP2_ZT4 control rep1 / gastrocnemius / .
47	0.342646	0.326395	0.0162504	0.203541	0.199688	0.00385347	0.0828315	0.212312	0.346782	0.650414	0.502524	ENCFF513QAB	DNASE:C57BL/6 heart postnatal (0 days)
1002	2.36578	2.26559	0.100186	0.81674	0.80229	0.0144499	0.0838467	0.21458	0.113332	0.383137	0.502512	ENCFF011VMX	CHIP:H3K27ac:C57BL/6 hindbrain embryo (16.5 days)
743	0.947116	0.944491	0.00262517	0.60623	0.605436	0.000793934	0.0841831	0.215106	0.0364338	0.189433	0.502508	ENCFF981JRQ	CHIP:H3K9me3:C57BL/6 intestine embryo (16.5 days)
1014	2.92739	2.91048	0.0169058	0.754443	0.743119	0.0113236	0.0846465	0.215954	0.437328	0.733943	0.502503	ENCFF074EMQ	CHIP:H3K4me2:C57BL/6 hindbrain embryo (15.5 days)
1267	2.00058	1.94758	0.0529923	0.759501	0.750072	0.0094291	0.0850941	0.216759	0.111649	0.378225	0.502498	GSM874952	CHIP:RPB2:Polr2b_ZT10 / RPB2 IP / .
907	2.77115	2.63465	0.136495	0.746935	0.734819	0.0121157	0.0852716	0.216875	0.638732	0.845394	0.502496	ENCFF977AQW	CHIP:H3K4me2:C57BL/6 limb embryo (14.5 days)
983	2.14459	2.08318	0.0614152	0.876203	0.86759	0.00861341	0.0858721	0.217984	0.536332	0.78008	0.502489	ENCFF014HTI	CHIP:H3K27me3:C57BL/6 limb embryo (14.5 days)
1020	3.23238	3.01316	0.219216	0.878799	0.865375	0.0134248	0.0859728	0.217984	0.279852	0.599475	0.502487	ENCFF801FFG	CHIP:H3K27ac:C57BL/6 heart embryo (16.5 days)
783	2.02432	2.08282	-0.0585043	0.645868	0.636885	0.00898349	0.0861895	0.218196	0.407479	0.706212	0.502485	ENCFF638WLA	CHIP:H3K4me3:C57BL/6 neural tube embryo (11.5 days)
1107	1.26292	1.26158	0.00133991	0.509796	0.50363	0.00616556	0.0864488	0.218516	0.544697	0.783295	0.502482	ENCFF581XWU	CHIP:CTCF:C57BL/6 midbrain postnatal (0 days)
623	2.54786	2.61849	-0.0706298	0.690733	0.682513	0.00821996	0.0868946	0.218922	0.338363	0.644056	0.502477	ENCFF837LYE	CHIP:H3K4me3:C57BL/6 hindbrain embryo (14.5 days)
13	0.299705	0.294239	0.00546598	0.204722	0.201306	0.00341697	0.0870928	0.218922	0.381279	0.679437	0.502474	ENCFF660XSJ	DNASE:mixed WW6
1060	2.03472	2.08853	-0.0538146	0.637397	0.627992	0.00940484	0.0871992	0.218922	0.355417	0.656573	0.502473	ENCFF703BHN	CHIP:H3K4me3:C57BL/6 hindbrain embryo (11.5 days)
686	1.56755	1.56573	0.00182283	0.653967	0.644131	0.00983632	0.0872654	0.218922	0.382919	0.680147	0.502472	ENCFF147ZWY	CHIP:H3K9ac:C57BL/6 midbrain embryo (13.5 days)
1592	2.65493	2.56429	0.0906355	0.936166	0.924494	0.0116713	0.0873242	0.218922	0.0290899	0.167701	0.502472	CNhs13034	CAGE:visual cortex - wildtype, neonate N30,
553	1.62268	1.62134	0.00133502	0.649891	0.641173	0.00871813	0.0874377	0.218922	0.433989	0.733213	0.50247	ENCFF537ZRP	CHIP:H3K9ac:C57BL/6 midbrain embryo (14.5 days)
1595	2.69175	2.60588	0.0858717	0.951972	0.941217	0.0107557	0.0875421	0.218922	0.0299914	0.169917	0.502469	CNhs13042	CAGE:visual cortex - Mecp knockout, neonate N30,
86	0.231752	0.225344	0.00640737	0.164807	0.160504	0.00430302	0.087924	0.219447	0.267374	0.587292	0.502465	ENCFF353HPD	DNASE:C57BL/6 yolk sac embryo (10.50 days)
1596	3.97677	3.85934	0.117431	1.17354	1.16086	0.0126863	0.0880819	0.219447	0.0595394	0.259177	0.502463	CNhs13048	CAGE:visual cortex - Mecp knockout, neonate N60-70,
714	2.68221	2.67447	0.00773525	0.716647	0.704086	0.0125605	0.0881529	0.219447	0.316469	0.622918	0.502462	ENCFF952PTF	CHIP:H3K4me2:C57BL/6 midbrain postnatal (0 days)
1256	3.3983	3.34116	0.0571351	1.02303	1.01424	0.00879586	0.0885159	0.219607	0.172654	0.471998	0.502458	GSM864681	CHIP:.:RNAPolII ChIP WT Bexarotene replicate 1 / C57BL/6 wild type mouse liver / .
522	1.73348	1.6239	0.109579	0.762973	0.752964	0.0100088	0.0886012	0.219607	0.536546	0.78008	0.502457	ENCFF786GEI	CHIP:H3K36me3:C57BL/6 embryonic facial prominence embryo (11.5 days)
771	1.76896	1.7043	0.064659	0.616578	0.604494	0.0120834	0.0886669	0.219607	0.499605	0.765484	0.502456	ENCFF623HDU	CHIP:H3K4me2:C57BL/6 embryonic facial prominence embryo (11.5 days)
1238	4.26355	4.1524	0.111153	1.1524	1.14347	0.00893259	0.088819	0.219607	0.379837	0.678339	0.502455	GSM647032	CHIP:.:Pol II ChIP at ZT22 / Liver / .
751	2.2034	2.13646	0.0669363	0.780231	0.770727	0.00950426	0.0889575	0.219607	0.534015	0.779207	0.502453	ENCFF440SVM	CHIP:H3K9ac:C57BL/6 heart embryo (16.5 days)
44	0.268246	0.260708	0.0075382	0.184789	0.181196	0.00359291	0.0890246	0.219607	0.418752	0.717424	0.502452	ENCFF424XOH	DNASE:129 ZHBTc4-mESC
954	1.34224	1.34587	-0.00363195	0.590453	0.582003	0.00844967	0.0891526	0.219607	0.448132	0.737443	0.502451	ENCFF391DVK	CHIP:H3K9ac:C57BL/6 forebrain embryo (15.5 days)
241	3.46053	3.25441	0.20612	1.07407	1.06224	0.0118303	0.0892949	0.219628	0.161389	0.457176	0.502449	ENCFF517JPC	CHIP:H3K36me3:C3H C2C12
1088	4.63739	4.43085	0.206542	1.18518	1.17596	0.0092268	0.0896385	0.220144	0.362923	0.665494	0.502445	ENCFF293RMV	CHIP:H3K27me3:C57BL/6 midbrain embryo (10.5 days)
1637	0.0676861	0.0644082	0.0032779	0.0488064	0.0473951	0.00141132	0.0902577	0.221333	0.536987	0.78008	0.502439	CNhs14332	CAGE:natural helper cells, IL33 treated, 01hr, biol_, tech_rep2
1187	0.305085	0.300826	0.00425947	0.237917	0.235484	0.0024333	0.0908364	0.222134	0.571009	0.801853	0.502432	GSM1659684	CHIP:.:Rev-erbalpha_brain_ZT10 / brain(ventral tegmental area) / .
678	1.96705	1.85054	0.116511	0.848997	0.839009	0.00998771	0.0908545	0.222134	0.279107	0.598658	0.502432	ENCFF353QFF	CHIP:H3K36me3:C57BL/6 intestine embryo (16.5 days)
208	0.273226	0.260397	0.0128288	0.181473	0.17643	0.00504284	0.0918388	0.224207	0.27899	0.598658	0.502421	UW30.3	ATAC:Collisions-clusters_30-cluster_3
519	2.42986	2.51732	-0.0874674	0.679266	0.671686	0.00757998	0.0921874	0.224233	0.461593	0.744988	0.502417	ENCFF469CPH	CHIP:H3K4me3:C57BL/6 forebrain embryo (15.5 days)
733	2.24925	2.19169	0.0575647	0.77716	0.767254	0.00990635	0.0922136	0.224233	0.367471	0.667412	0.502417	ENCFF770FZI	CHIP:H3K9ac:C57BL/6 heart embryo (14.5 days)
1269	2.55098	2.48385	0.0671332	0.862684	0.853218	0.00946575	0.0922589	0.224233	0.469093	0.750457	0.502416	GSM874954	CHIP:RPB2:Polr2b_ZT18 / RPB2 IP / .
369	1.64637	1.5979	0.0484704	0.831341	0.822924	0.00841677	0.0928589	0.225093	0.182582	0.487644	0.50241	ENCFF316WWL	CHIP:H3K27me3:C57BL/6 ES-Bruce4
841	3.18768	3.16638	0.0212934	0.778661	0.766233	0.012428	0.0928868	0.225093	0.513252	0.770113	0.502409	ENCFF087WAM	CHIP:H3K4me2:C57BL/6 neural tube embryo (15.5 days)
71	0.217737	0.211732	0.00600535	0.15637	0.151929	0.00444165	0.0930727	0.225211	0.45948	0.743183	0.502407	ENCFF641OPE	DNASE:C57BL/6 limb embryo (11.5 days)
15	0.230468	0.220074	0.0103943	0.153366	0.148857	0.00450918	0.0933918	0.225651	0.197707	0.50206	0.502404	ENCFF837OUY	DNASE:CD-1 forelimb bud male embryo (11.5 days)
798	1.49183	1.45033	0.0414981	0.699383	0.690445	0.00893813	0.0936349	0.225906	0.372077	0.671784	0.502401	ENCFF833YTL	CHIP:H3K4me1:C57BL/6 midbrain embryo (15.5 days)
1006	2.80756	2.68309	0.124477	1.04602	1.03691	0.00910342	0.0939551	0.226346	0.315669	0.622918	0.502398	ENCFF032RGE	CHIP:H3K36me3:C57BL/6 hindbrain embryo (15.5 days)
647	5.11036	4.76761	0.342748	1.32295	1.3098	0.0131502	0.0941879	0.226575	0.305312	0.620284	0.502395	ENCFF046KVG	CHIP:H3K36me3:C57BL/6 heart embryo (13.5 days)
1591	7.32959	7.13823	0.191358	1.5847	1.57016	0.0145413	0.0943267	0.226575	0.104712	0.361432	0.502394	CNhs13032	CAGE:visual cortex - wildtype, neonate N15,
677	2.11712	2.03345	0.0836692	0.791323	0.779935	0.0113879	0.0944638	0.226575	0.339377	0.644056	0.502392	ENCFF853FDI	CHIP:H3K4me1:C57BL/6 midbrain embryo (10.5 days)
34	0.290644	0.275224	0.0154198	0.172624	0.167041	0.00558318	0.0950331	0.227608	0.45957	0.743183	0.502386	ENCFF261PZG	DNASE:C57BL/6 retina male postnatal (1 day)
515	1.85065	1.85046	0.000193	0.686397	0.676554	0.00984311	0.0958459	0.22919	0.47864	0.756886	0.502377	ENCFF212XYE	CHIP:H3K9ac:C57BL/6 forebrain embryo (16.5 days)
1314	1.3538	1.3019	0.0519009	0.620766	0.612479	0.00828713	0.0959724	0.22919	0.0329294	0.17947	0.502376	CNhs10494	CAGE:cerebellum, adult
1284	6.71107	6.39473	0.316341	1.35101	1.34153	0.00948536	0.0962963	0.22963	0.324534	0.63027	0.502373	GSM874969	CHIP:H3K36me3:H3K36me3_ZT22 / H3K36me3 IP / .
316	2.52014	2.48962	0.0305278	0.660211	0.654741	0.0054692	0.0965899	0.229996	0.350699	0.653099	0.502369	ENCFF032JSS	CHIP:H3K4me3:C57BL/6 small intestine male adult (8 weeks)
941	1.06577	1.02251	0.0432537	0.573414	0.562484	0.0109307	0.0974112	0.231616	0.0458509	0.224139	0.502361	ENCFF124AFN	CHIP:H3K4me1:C57BL/6 hindbrain embryo (11.5 days)
1083	3.24949	3.18448	0.0650053	1.12281	1.11352	0.00929058	0.097705	0.231835	0.352254	0.653221	0.502358	ENCFF551QTH	CHIP:H3K27me3:C57BL/6 heart embryo (11.5 days)
814	3.7284	3.49084	0.237566	1.15811	1.14668	0.0114303	0.0977853	0.231835	0.401063	0.700262	0.502357	ENCFF686TFW	CHIP:H3K36me3:C57BL/6 heart embryo (16.5 days)
1265	3.19547	3.11493	0.0805395	0.977387	0.967933	0.00945395	0.0982987	0.232716	0.249226	0.567145	0.502351	GSM874950	CHIP:RPB2:Polr2b_ZT02 / RPB2 IP / .
1211	0.730039	0.769743	-0.0397037	0.49873	0.500283	-0.00155222	0.0987858	0.233532	0.147067	0.43147	0.502346	GSM2390534	CHIP:.:ChIP-seq Rpc4 , ZT10, rep1, CONSTANTLY FED / Liver / .
1213	0.696817	0.733482	-0.0366647	0.486744	0.485881	0.000862867	0.0993552	0.234541	0.304439	0.620284	0.50234	GSM2390536	CHIP:.:ChIP-seq Rpc4 , ZT18, rep1, CONSTANTLY FED / Liver / .
635	3.41252	3.41145	0.00107145	0.983245	0.97423	0.00901479	0.0998219	0.235305	0.346171	0.650051	0.502335	ENCFF469DBC	CHIP:H3K4me3:129 E14TG2a.4
345	1.70383	1.64135	0.0624777	0.677277	0.669827	0.00744951	0.100018	0.23543	0.444116	0.736061	0.502333	ENCFF421ODL	CHIP:H3K9ac:C57BL/6 heart male adult (8 weeks)
572	2.4093	2.31082	0.0984747	0.829545	0.816048	0.0134974	0.100612	0.236489	0.0611326	0.263624	0.502327	ENCFF835DLZ	CHIP:H3K27ac:C57BL/6 forebrain postnatal (0 days)
1215	0.743951	0.779137	-0.0351859	0.508131	0.507848	0.000282645	0.102464	0.239588	0.132238	0.409166	0.502308	GSM2390538	CHIP:.:ChIP-seq Rpc4 , ZT26, rep1, CONSTANTLY FED / Liver / .
1283	6.03515	5.74769	0.287457	1.28576	1.27684	0.00891769	0.102489	0.239588	0.335427	0.641567	0.502308	GSM874968	CHIP:H3K36me3:H3K36me3_ZT18 / H3K36me3 IP / .
748	2.91769	2.99565	-0.077955	0.80191	0.793676	0.00823444	0.102506	0.239588	0.347835	0.650989	0.502308	ENCFF149KHB	CHIP:H3K4me3:C57BL/6 forebrain embryo (10.5 days)
423	1.19259	1.13966	0.0529226	0.644848	0.63537	0.00947803	0.10254	0.239588	0.283041	0.603248	0.502308	ENCFF561RBC	CHIP:POLR2AphosphoS5:129 G1E
1050	3.99252	3.85844	0.134085	1.13755	1.12703	0.0105176	0.10266	0.239588	0.286405	0.60532	0.502306	ENCFF217MZD	CHIP:H3K27me3:C57BL/6 limb embryo (10.5 days)
643	2.93265	2.91438	0.0182731	0.753165	0.74169	0.011475	0.102889	0.239782	0.376361	0.67433	0.502304	ENCFF791DCG	CHIP:H3K4me2:C57BL/6 hindbrain embryo (14.5 days)
5	0.331932	0.319516	0.0124159	0.236829	0.231679	0.00514978	0.103642	0.241194	0.170925	0.47067	0.502296	ENCFF395AJZ	DNASE:C57BL/6 telencephalon male adult (8 weeks)
624	1.75883	1.74267	0.016157	0.687946	0.676933	0.0110124	0.104536	0.242041	0.306631	0.620284	0.502287	ENCFF361RBA	CHIP:H3K9ac:C57BL/6 hindbrain embryo (14.5 days)
1124	2.18042	2.12438	0.0560439	0.805778	0.796667	0.00911105	0.104578	0.242041	0.488964	0.76067	0.502287	GSM1176724	CHIP:RPB2:Polr2b (ZT14) / RPB2_ZT14, liver cells / .
894	1.58062	1.48804	0.0925817	0.744819	0.736861	0.00795799	0.104589	0.242041	0.201782	0.507699	0.502287	ENCFF966UNT	CHIP:H3K36me3:C57BL/6 stomach embryo (15.5 days)
551	2.23388	2.14584	0.0880401	0.795474	0.782827	0.0126473	0.104618	0.242041	0.3071	0.620284	0.502286	ENCFF121XJR	CHIP:H3K27ac:C57BL/6 hindbrain embryo (15.5 days)
649	2.22873	2.14392	0.0848048	0.799782	0.786934	0.0128484	0.104742	0.242041	0.316748	0.622918	0.502285	ENCFF789UMC	CHIP:H3K27ac:C57BL/6 neural tube embryo (15.5 days)
639	3.24118	3.13822	0.10296	1.05458	1.0444	0.0101762	0.105136	0.24261	0.3966	0.697104	0.502281	ENCFF865VFL	CHIP:H3K27me3:C57BL/6 limb embryo (12.5 days)
926	2.20172	2.22119	-0.0194645	0.675332	0.66577	0.00956124	0.106176	0.244666	0.283083	0.603248	0.502271	ENCFF696ITD	CHIP:H3K4me3:C57BL/6 kidney embryo (14.5 days)
557	2.04232	1.99236	0.0499569	0.755446	0.745412	0.0100346	0.10661	0.245322	0.318852	0.622918	0.502267	ENCFF045OSV	CHIP:H3K9ac:C57BL/6 heart embryo (13.5 days)
317	2.52265	2.44399	0.0786536	0.979804	0.970481	0.00932258	0.106882	0.245604	0.263528	0.58051	0.502264	ENCFF572JFH	CHIP:H3K27ac:C57BL/6 testis male adult (8 weeks)
912	1.19562	1.19745	-0.00182772	0.559646	0.550935	0.00871062	0.107458	0.246584	0.370746	0.670855	0.502258	ENCFF758CLJ	CHIP:H3K9ac:C57BL/6 hindbrain embryo (15.5 days)
43	0.224221	0.211904	0.0123176	0.150786	0.145798	0.00498717	0.107646	0.246594	0.275986	0.596771	0.502256	ENCFF333MPS	DNASE:C57BL/6 brain male embryo (18.5 days)
493	3.05331	2.8967	0.156608	1.01976	1.00854	0.0112213	0.107763	0.246594	0.560373	0.793701	0.502255	ENCFF587NFU	CHIP:POLR2AphosphoS2:DBA/2 MEL cell line
811	1.29585	1.2695	0.0263455	0.647785	0.641243	0.00654268	0.108124	0.247077	0.270699	0.590648	0.502252	ENCFF695KNJ	CHIP:H3K4me1:C57BL/6 forebrain postnatal (0 days)
1255	2.71974	2.67148	0.0482583	0.905206	0.898559	0.00664693	0.108612	0.247648	0.305769	0.620284	0.502247	GSM864679	CHIP:.:RNAPolII ChIP WT Control replicate 1 / C57BL/6 wild type mouse liver / .
298	2.31864	2.23042	0.0882194	0.864875	0.857861	0.00701386	0.108739	0.247648	0.150298	0.438615	0.502246	ENCFF868AOT	CHIP:POLR2A:C57BL/6 heart male adult (8 weeks)
688	1.40337	1.38416	0.0192038	0.633731	0.626022	0.00770968	0.108826	0.247648	0.690529	0.866722	0.502245	ENCFF495TXX	CHIP:H3K9ac:C57BL/6 kidney postnatal (0 days)
955	1.80981	1.8112	-0.0013895	0.694628	0.683529	0.0110995	0.109123	0.247979	0.277274	0.598636	0.502242	ENCFF810BQP	CHIP:H3K9ac:C57BL/6 hindbrain embryo (16.5 days)
802	0.808446	0.802537	0.00590968	0.52863	0.527722	0.000907302	0.109424	0.248164	0.059107	0.258789	0.502239	ENCFF172OCI	CHIP:H3K9me3:C57BL/6 heart embryo (10.5 days)
625	1.81183	1.79533	0.0165037	0.712308	0.700537	0.011771	0.109506	0.248164	0.134579	0.414848	0.502238	ENCFF768XVB	CHIP:H3K9ac:C57BL/6 hindbrain embryo (13.5 days)
328	2.54256	2.3798	0.162756	0.762732	0.751139	0.0115928	0.109756	0.248387	0.267748	0.58733	0.502236	ENCFF034YQZ	CHIP:H3K27ac:C57BL/6 heart embryo (14.5 days)
511	1.41267	1.40562	0.00705159	0.52796	0.523653	0.00430614	0.110248	0.249157	0.213776	0.525801	0.502231	ENCFF661SPC	CHIP:CTCF:C57BL/6 intestine postnatal (0 days)
1594	5.51016	5.35663	0.153526	1.38734	1.37376	0.0135765	0.111028	0.250576	0.0803629	0.310973	0.502224	CNhs13040	CAGE:visual cortex - Mecp knockout, neonate N15,
1125	2.56052	2.49229	0.0682294	0.863637	0.854023	0.00961435	0.111262	0.250759	0.492497	0.76067	0.502221	GSM1176725	CHIP:RPB2:Polr2b (ZT18) / RPB2_ZT18, liver cells / .
768	2.06881	2.06535	0.00345826	0.639853	0.627611	0.0122419	0.112065	0.252222	0.421734	0.72028	0.502214	ENCFF083ZPL	CHIP:H3K4me2:C57BL/6 forebrain embryo (15.5 days)
718	2.56	2.45007	0.109933	0.883448	0.869687	0.0137613	0.112881	0.253712	0.184416	0.487644	0.502206	ENCFF665WCP	CHIP:H3K27ac:C57BL/6 hindbrain postnatal (0 days)
843	2.08122	2.09006	-0.00883842	0.655338	0.64737	0.00796807	0.113112	0.253884	0.625612	0.83865	0.502204	ENCFF180VGZ	CHIP:H3K4me3:C57BL/6 stomach embryo (15.5 days)
1003	1.89947	1.85332	0.0461512	0.724098	0.714445	0.00965375	0.113314	0.25399	0.410848	0.708313	0.502202	ENCFF094RXG	CHIP:H3K9ac:C57BL/6 stomach embryo (16.5 days)
835	2.38706	2.20384	0.183227	0.865168	0.854262	0.0109061	0.113758	0.254638	0.278159	0.598658	0.502197	ENCFF397XOU	CHIP:H3K36me3:C57BL/6 liver embryo (15.5 days)
1275	1.94827	1.90954	0.038727	0.558224	0.550169	0.00805467	0.114174	0.254927	0.159765	0.454929	0.502194	GSM874960	CHIP:H3K4me3:H3K4me3_ZT14 / H3K4me3 IP / .
1123	2.01631	1.96262	0.0536854	0.762626	0.753093	0.00953245	0.114198	0.254927	0.151717	0.439632	0.502193	GSM1176723	CHIP:RPB2:Polr2b (ZT10) / RPB2_ZT10, liver cells / .
545	2.24744	2.19266	0.0547795	0.939573	0.931585	0.00798732	0.114405	0.255044	0.440448	0.734676	0.502191	ENCFF944UBT	CHIP:H3K27me3:C57BL/6 embryonic facial prominence embryo (15.5 days)
590	3.0172	2.97449	0.0427122	1.12274	1.11452	0.00822377	0.114595	0.255121	0.485171	0.76067	0.50219	ENCFF379MVJ	CHIP:H3K27me3:C57BL/6 heart embryo (12.5 days)
1112	0.406034	0.423342	-0.017308	0.280735	0.280494	0.000241727	0.114839	0.255214	0.0246922	0.15257	0.502187	GSM1094254	CHIP:CEBPb:CEBPB_ChIP-seq / CEBPB_ChIP-seq / Primary dermal fibroblasts
536	1.40015	1.36541	0.0347381	0.625425	0.618594	0.00683051	0.115083	0.255214	0.419675	0.718257	0.502185	ENCFF563JNZ	CHIP:H3K9ac:C57BL/6 stomach postnatal (0 days)
698	2.32314	2.33735	-0.0142136	0.674596	0.668774	0.00582248	0.115103	0.255214	0.304412	0.620284	0.502185	ENCFF551UEX	CHIP:H3K4me3:C57BL/6 lung embryo (15.5 days)
79	0.181783	0.176683	0.00509988	0.135731	0.131447	0.00428468	0.115551	0.255417	0.293771	0.611744	0.502181	ENCFF247KMU	DNASE:C57BL/6 forebrain embryo (10.50 days)
675	3.58877	3.50987	0.0788949	1.19082	1.18108	0.00974452	0.115633	0.255417	0.373399	0.671901	0.50218	ENCFF046VWN	CHIP:H3K27me3:C57BL/6 heart embryo (10.5 days)
1053	1.76016	1.73435	0.0258064	0.704365	0.694505	0.00985968	0.115851	0.255417	0.488727	0.76067	0.502178	ENCFF586VVE	CHIP:H3K9ac:C57BL/6 kidney embryo (16.5 days)
566	1.73012	1.72331	0.00681663	0.678227	0.667738	0.0104889	0.115872	0.255417	0.339828	0.644056	0.502178	ENCFF290BIA	CHIP:H3K9ac:C57BL/6 neural tube embryo (13.5 days)
693	3.29203	3.02524	0.266798	0.996985	0.984964	0.0120215	0.116173	0.255417	0.287934	0.607285	0.502175	ENCFF004EZJ	CHIP:H3K36me3:C57BL/6 liver embryo (12.5 days)
717	3.94867	3.68421	0.264469	1.17023	1.15937	0.0108565	0.116238	0.255417	0.303047	0.620284	0.502174	ENCFF474PLN	CHIP:H3K36me3:C57BL/6 heart embryo (10.5 days)
652	2.47842	2.48407	-0.0056448	0.691053	0.683043	0.00800979	0.116282	0.255417	0.514291	0.770264	0.502174	ENCFF205JZO	CHIP:H3K4me3:C57BL/6 limb embryo (15.5 days)
921	3.3176	3.10292	0.21468	1.04656	1.03539	0.0111679	0.116515	0.255586	0.137607	0.420237	0.502172	ENCFF555EBK	CHIP:H3K36me3:C57BL/6 liver postnatal (0 days)
1157	3.53718	3.43941	0.0977752	1.04083	1.03056	0.0102695	0.117443	0.257035	0.292372	0.611154	0.502163	GSM1479711	CHIP:PolII:PolII ZT 10 WT / Liver, WT, ZT 10, PolII ChIP / .
399	2.37106	2.35515	0.0159099	1.04144	1.03608	0.00536096	0.117488	0.257035	0.483718	0.76067	0.502163	ENCFF851DGO	CHIP:H3K9me3:CD-1 megakaryocyte embryo (14.5 days)
322	1.17333	1.1582	0.0151314	0.58638	0.580838	0.00554162	0.118225	0.258304	0.513831	0.770264	0.502156	ENCFF124CBV	CHIP:H3K27ac:C57BL/6 ES-Bruce4
1268	2.18379	2.12684	0.0569496	0.806215	0.796838	0.00937623	0.118899	0.25943	0.540989	0.781746	0.50215	GSM874953	CHIP:RPB2:Polr2b_ZT14 / RPB2 IP / .
784	2.36794	2.44819	-0.0802488	0.650893	0.643033	0.00786	0.119616	0.260649	0.209312	0.515591	0.502143	ENCFF339HOE	CHIP:H3K4me3:C57BL/6 midbrain postnatal (0 days)
593	1.89308	1.89471	-0.00163233	0.705392	0.695538	0.00985396	0.120254	0.261581	0.409491	0.706811	0.502137	ENCFF719KVF	CHIP:H3K9ac:C57BL/6 forebrain embryo (14.5 days)
394	1.59033	1.48914	0.10119	0.692736	0.683413	0.00932336	0.120362	0.261581	0.597686	0.821069	0.502136	ENCFF111CIF	CHIP:H3K36me3:129 ES-E14
390	1.56728	1.5504	0.0168804	0.760311	0.753003	0.00730801	0.120661	0.261884	0.509662	0.76908	0.502134	ENCFF899GLT	CHIP:H3K4me1:129 ES-E14
742	3.54747	3.50007	0.0473933	1.20923	1.20094	0.00829172	0.121414	0.263171	0.247431	0.56384	0.502127	ENCFF129FZH	CHIP:H3K27me3:C57BL/6 heart embryo (14.5 days)
324	2.6072	2.53098	0.0762134	0.863081	0.857853	0.00522852	0.121804	0.263669	0.578833	0.807422	0.502123	ENCFF188DKO	CHIP:H3K27ac:C57BL/6 kidney male adult (8 weeks)
1281	6.59188	6.29922	0.292666	1.36724	1.35865	0.00858867	0.123774	0.267455	0.532307	0.778886	0.502106	GSM874966	CHIP:H3K36me3:H3K36me3_ZT10 / H3K36me3 IP / .
84	0.285961	0.275754	0.0102075	0.18462	0.179112	0.00550838	0.123902	0.267455	0.289531	0.607683	0.502104	ENCFF684BQC	DNASE:C57BL/6 forebrain postnatal (0 days)
578	2.77767	2.66826	0.109413	0.963301	0.956944	0.00635689	0.12409	0.267455	0.262905	0.58051	0.502103	ENCFF612RDE	CHIP:H3K27me3:C57BL/6 midbrain embryo (12.5 days)
1280	6.86704	6.56902	0.298018	1.39754	1.38821	0.00932539	0.124274	0.267455	0.639577	0.845394	0.502101	GSM874965	CHIP:H3K36me3:H3K36me3_ZT06 / H3K36me3 IP / .
1593	4.06783	3.94594	0.121894	1.18642	1.17399	0.0124272	0.124367	0.267455	0.0187699	0.127548	0.5021	CNhs13037	CAGE:visual cortex - wildtype, neonate N60-70,
237	2.90744	2.69431	0.21313	0.929767	0.919849	0.00991803	0.124679	0.267774	0.346193	0.650051	0.502098	ENCFF981EVL	CHIP:H3K36me3:DBA/2 MEL cell line treated with 2% dimethyl sulfoxide for 5 days
248	4.71077	4.58811	0.122657	1.05764	1.05127	0.00636852	0.125086	0.268298	0.460198	0.743467	0.502094	ENCFF245DME	CHIP:H3K4me2:C3H myocyte originated from C2C12
18	0.455306	0.431549	0.0237575	0.244636	0.240826	0.00380969	0.12583	0.269193	0.327487	0.63376	0.502087	ENCFF773NKY	DNASE:C57BL/6 heart male adult (8 weeks)
554	2.27926	2.27424	0.0050261	0.666179	0.653642	0.0125367	0.125831	0.269193	0.38501	0.682386	0.502087	ENCFF880WPO	CHIP:H3K4me2:C57BL/6 forebrain embryo (11.5 days)
61	0.249813	0.24274	0.00707275	0.162004	0.157601	0.00440343	0.126056	0.269323	0.43876	0.734191	0.502085	ENCFF115OLL	DNASE:C57BL/6 midbrain embryo (14.5 days)
933	1.15318	1.15607	-0.00289369	0.496867	0.49135	0.00551692	0.127305	0.271066	0.56798	0.800336	0.502074	ENCFF500SSQ	CHIP:CTCF:C57BL/6 forebrain postnatal (0 days)
579	1.51953	1.5145	0.00503004	0.558928	0.556321	0.00260663	0.127342	0.271066	0.322178	0.627177	0.502074	ENCFF685EPG	CHIP:CTCF:C57BL/6 stomach postnatal (0 days)
1121	3.23689	3.15526	0.081629	0.983191	0.973789	0.00940162	0.127367	0.271066	0.31082	0.620284	0.502074	GSM1176721	CHIP:RPB2:Polr2b (ZT02) / RPB2_ZT02, liver cells / .
939	2.59683	2.48896	0.107867	0.83494	0.821162	0.013778	0.127619	0.271066	0.0639439	0.272176	0.502072	ENCFF440SCC	CHIP:H3K27ac:C57BL/6 forebrain embryo (15.5 days)
1214	0.75625	0.794556	-0.0383055	0.518711	0.519038	-0.000326693	0.127696	0.271066	0.217191	0.527097	0.502071	GSM2390537	CHIP:.:ChIP-seq Rpc4 , ZT22, rep1, CONSTANTLY FED / Liver / .
837	1.05999	1.02344	0.0365481	0.577228	0.567586	0.00964212	0.128515	0.272453	0.230684	0.544632	0.502064	ENCFF832GKC	CHIP:H3K4me1:C57BL/6 embryonic facial prominence embryo (11.5 days)
865	2.51493	2.41637	0.0985548	0.805254	0.792071	0.0131832	0.129045	0.273222	0.160293	0.455642	0.502059	ENCFF447LGJ	CHIP:H3K27ac:C57BL/6 midbrain embryo (16.5 days)
436	5.14087	5.17352	-0.0326509	1.49046	1.48583	0.0046339	0.130233	0.275073	0.426445	0.72456	0.502049	ENCFF999SUS	CHIP:H3K27me3:129 G1E-ER4 treated with 10 nM 17B-estradiol for 24 hours
1168	2.60865	2.54179	0.0668662	0.883628	0.875669	0.0079596	0.130254	0.275073	0.49029	0.76067	0.502049	GSM1479722	CHIP:PolII:PolII ZT 26 Bmal1 KO / Liver, Bmal1 KO, ZT 26, PolII ChIP / .
1222	1.73126	1.75165	-0.0203931	0.802274	0.797255	0.00501877	0.130713	0.275688	0.422209	0.720343	0.502045	GSM2390584	CHIP:.:ChIP-seq Rpc4 , ZT02, rep1, Maf1 KO / Liver / .
273	2.36655	2.28269	0.0838661	0.839368	0.827865	0.0115026	0.131365	0.276489	0.19807	0.502205	0.502039	ENCFF680DPI	CHIP:POLR2A:C3H myocyte originated from C2C12
1260	2.60331	2.55926	0.0440481	0.888389	0.882447	0.00594193	0.131564	0.276489	0.314697	0.622198	0.502038	GSM864689	CHIP:.:RNAPolII ChIP LXRdKO T0901317 replicate 1 / C57BL/6 LXRdKO mouse liver / .
919	2.46078	2.35534	0.105446	0.703491	0.695031	0.00845981	0.131597	0.276489	0.6532	0.84812	0.502037	ENCFF615IVU	CHIP:H3K4me3:C57BL/6 liver postnatal (0 days)
228	2.24376	2.07678	0.16698	0.670645	0.661734	0.00891095	0.132577	0.278192	0.501949	0.765739	0.502029	ENCFF426ODS	CHIP:H3K4me3:B10.H-2aH-4bp/Wts CH12.LX
737	2.01815	1.95313	0.0650181	0.810735	0.799558	0.0111769	0.132962	0.278465	0.465645	0.748585	0.502026	ENCFF429OYS	CHIP:H3K4me1:C57BL/6 hindbrain embryo (13.5 days)
1259	2.99927	2.95166	0.0476079	0.960542	0.954881	0.00566053	0.133184	0.278465	0.398897	0.699454	0.502024	GSM864687	CHIP:.:RNAPolII ChIP LXRdKO Bexarotene replicate 1 / C57BL/6 LXRdKO mouse liver / .
932	3.46058	3.24232	0.218261	0.930732	0.919989	0.010743	0.133216	0.278465	0.476803	0.756304	0.502024	ENCFF804EYG	CHIP:H3K27ac:C57BL/6 heart postnatal (0 days)
528	2.57249	2.37178	0.200708	0.889368	0.878371	0.010997	0.133552	0.278769	0.316876	0.622918	0.502021	ENCFF813MON	CHIP:H3K36me3:C57BL/6 liver embryo (13.5 days)
1155	4.64329	4.52575	0.11754	1.18477	1.17539	0.0093807	0.133722	0.278769	0.475981	0.756304	0.502019	GSM1479709	CHIP:PolII:PolII ZT 2 WT / Liver, WT, ZT 2, PolII ChIP / .
1642	2.3038	2.10933	0.194472	0.671295	0.661857	0.00943846	0.134008	0.278769	0.310085	0.620284	0.502017	CNhs14382	CAGE:natural helper cells, naive, biol_, tech_rep3
36	0.35685	0.341582	0.0152677	0.21621	0.212338	0.00387202	0.13404	0.278769	0.317719	0.622918	0.502017	ENCFF731YAA	DNASE:C57BL/6 skeletal muscle tissue male adult (8 weeks)
858	2.38823	2.27439	0.113841	0.824204	0.818265	0.00593966	0.13438	0.278996	0.647819	0.846135	0.502014	ENCFF485WCD	CHIP:H3K27me3:C57BL/6 midbrain embryo (11.5 days)
1132	6.37778	6.33168	0.0460958	1.29477	1.28706	0.00771475	0.134488	0.278996	0.487884	0.76067	0.502013	GSM1198163	CHIP:H3K9ac:H3K9ac ChIPSeq HEBI_cohort2 / H3K9ac ChIPSeq HEBI_cohort2 / .
1069	2.30217	2.2039	0.0982721	0.829963	0.82432	0.00564325	0.134777	0.279241	0.343849	0.647871	0.50201	ENCFF375ONW	CHIP:H3K27me3:C57BL/6 forebrain embryo (11.5 days)
1146	8.47962	8.26351	0.216105	1.59189	1.5817	0.0101895	0.135958	0.281219	0.636668	0.845394	0.502001	GSM1446068	CHIP:RNAPII:ChIP-seq, Liver_RNAPII_WT_6am / Liver tissue / .
42	0.413138	0.392224	0.0209141	0.265183	0.258891	0.00629255	0.136074	0.281219	0.271796	0.592256	0.502	ENCFF257BKZ	DNASE:C57BL/6 brain male adult (8 weeks)
1282	7.11603	6.77877	0.337266	1.39404	1.38506	0.00898671	0.136485	0.281685	0.377085	0.674892	0.501996	GSM874967	CHIP:H3K36me3:H3K36me3_ZT14 / H3K36me3 IP / .
201	0.247986	0.239439	0.00854699	0.175284	0.170867	0.00441642	0.136642	0.281685	0.231563	0.544632	0.501995	UW27.3	ATAC:Collisions-clusters_27-cluster_3
161	0.14859	0.147501	0.00108913	0.129399	0.127761	0.0016385	0.137446	0.282987	0.239828	0.554982	0.501988	UW15.1	ATAC:Inhibitory_neurons-clusters_15-cluster_1
995	3.35853	3.31293	0.0456035	1.1707	1.16328	0.00741756	0.13804	0.283374	0.311905	0.620284	0.501983	ENCFF280UTR	CHIP:H3K27me3:C57BL/6 heart embryo (16.5 days)
1272	1.73772	1.71367	0.0240464	0.501805	0.496869	0.00493604	0.138102	0.283374	0.184907	0.487644	0.501983	GSM874957	CHIP:H3K4me3:H3K4me3_ZT02 / H3K4me3 IP / .
330	2.26025	2.29343	-0.03318	0.592715	0.587904	0.00481051	0.138346	0.283374	0.186169	0.488774	0.501981	ENCFF227BHG	CHIP:H3K4me3:C57BL/6 heart embryo (14.5 days)
901	1.9386	1.86605	0.0725404	0.771279	0.760922	0.010357	0.138474	0.283374	0.317375	0.622918	0.50198	ENCFF894YHQ	CHIP:H3K4me1:C57BL/6 hindbrain embryo (10.5 days)
1182	1.70907	1.69799	0.011084	0.725697	0.721157	0.00453985	0.138496	0.283374	0.286377	0.60532	0.50198	GSM1479736	CHIP:H3K27ac:H3K27ac ZT 26 Bmal1 KO / Liver, Bmal1 KO, ZT 26, H3K27ac ChIP / .
1057	1.39674	1.31633	0.0804121	0.692782	0.685455	0.00732774	0.139129	0.284315	0.485638	0.76067	0.501974	ENCFF815RWW	CHIP:H3K36me3:C57BL/6 intestine embryo (15.5 days)
349	1.56624	1.53342	0.0328237	0.622292	0.615072	0.00722086	0.139406	0.284528	0.152623	0.440786	0.501972	ENCFF265TCP	CHIP:H3K9ac:C57BL/6 liver male adult (8 weeks)
1009	1.5303	1.52757	0.00272918	0.801798	0.801566	0.000231385	0.139784	0.284943	0.0521185	0.241213	0.501969	ENCFF767LND	CHIP:H3K9me3:C57BL/6 kidney embryo (16.5 days)
1079	1.25301	1.23656	0.0164419	0.585912	0.579956	0.00595599	0.140163	0.285364	0.611132	0.8312	0.501966	ENCFF802SIF	CHIP:H3K9ac:C57BL/6 heart embryo (15.5 days)
842	1.61099	1.56091	0.0500787	0.680003	0.673279	0.0067234	0.141299	0.287319	0.404396	0.703819	0.501957	ENCFF042PHG	CHIP:H3K9ac:C57BL/6 heart postnatal (0 days)
313	2.25602	2.15054	0.105477	0.743346	0.736618	0.00672793	0.142154	0.2887	0.613815	0.832781	0.50195	ENCFF692OFZ	CHIP:H3K27ac:C57BL/6 bone marrow male adult (8 weeks)
1105	4.34075	4.16646	0.174287	1.17783	1.16914	0.00869501	0.143196	0.290289	0.451031	0.738828	0.501941	ENCFF898VDV	CHIP:H3K27me3:C57BL/6 hindbrain embryo (10.5 days)
874	2.58514	2.38962	0.195523	0.906571	0.896114	0.010457	0.143427	0.290289	0.167697	0.466204	0.501939	ENCFF702EWM	CHIP:H3K36me3:C57BL/6 liver embryo (16.5 days)
0	0.373332	0.374172	-0.000840306	0.210186	0.209983	0.000202462	0.143466	0.290289	0.727794	0.88423	0.501939	ENCFF866ZTV	DNASE:B6D2F1/J 416B
762	0.343799	0.342196	0.00160339	0.283083	0.279971	0.00311229	0.144108	0.291229	0.171394	0.47067	0.501934	ENCFF619BQO	CHIP:POU5F1:129 E14TG2a.4
789	2.56686	2.4062	0.160666	0.683114	0.674224	0.00888973	0.144793	0.292255	0.632954	0.843614	0.501928	ENCFF118SNE	CHIP:H3K4me3:C57BL/6 liver embryo (14.5 days)
1212	0.61923	0.650312	-0.0310826	0.445652	0.444479	0.00117385	0.145137	0.292547	0.700177	0.872169	0.501926	GSM2390535	CHIP:.:ChIP-seq Rpc4 , ZT14, rep1, CONSTANTLY FED / Liver / .
997	1.71963	1.67003	0.049606	0.751836	0.745838	0.00599837	0.145294	0.292547	0.508876	0.76908	0.501924	ENCFF513MGM	CHIP:H3K4me1:C57BL/6 heart embryo (10.5 days)
757	4.31217	4.2444	0.0677719	1.3226	1.31383	0.00876415	0.145849	0.293156	0.664279	0.851999	0.50192	ENCFF972QDT	CHIP:H3K27me3:C57BL/6 heart embryo (13.5 days)
325	2.90867	2.88273	0.0259316	0.835595	0.828281	0.00731391	0.145954	0.293156	0.485397	0.76067	0.501919	ENCFF632VNQ	CHIP:H3K27ac:C57BL/6 liver male adult (8 weeks)
12	0.257806	0.255889	0.00191683	0.195893	0.193262	0.00263101	0.146597	0.29409	0.504307	0.767806	0.501914	ENCFF974BRL	DNASE:mixed WW6
684	4.56731	4.39804	0.169274	1.20488	1.19505	0.00983119	0.147311	0.295161	0.459453	0.743183	0.501908	ENCFF798NZC	CHIP:H3K27me3:C57BL/6 embryonic facial prominence embryo (10.5 days)
190	0.228006	0.221368	0.00663859	0.154522	0.153002	0.00151944	0.14772	0.295314	0.654342	0.84812	0.501905	UW23.2	ATAC:Unknown-clusters_23-cluster_2
245	1.32541	1.31225	0.0131623	0.559061	0.553798	0.00526333	0.147747	0.295314	0.654987	0.84812	0.501905	ENCFF696NHF	CHIP:H3ac:C3H C2C12
927	2.34541	2.14594	0.199469	0.832529	0.822099	0.0104298	0.14843	0.2962	0.739332	0.885069	0.5019	ENCFF426WOD	CHIP:H3K36me3:C57BL/6 liver embryo (14.5 days)
362	2.99878	2.94484	0.0539343	0.722202	0.716166	0.00603527	0.148788	0.2962	0.434801	0.733213	0.501897	ENCFF186XGM	CHIP:H3K4me3:C57BL/6 bone marrow macrophage male adult (8 weeks)
586	2.09473	2.0127	0.0820222	0.66584	0.654125	0.0117149	0.148866	0.2962	0.49688	0.765112	0.501896	ENCFF061QXI	CHIP:H3K4me2:C57BL/6 limb embryo (11.5 days)
839	2.04326	1.92456	0.118701	0.857754	0.849086	0.00866741	0.148911	0.2962	0.544168	0.783295	0.501896	ENCFF307IYH	CHIP:H3K36me3:C57BL/6 stomach postnatal (0 days)
1055	2.02945	2.01462	0.0148304	0.65056	0.645112	0.00544894	0.150318	0.298637	0.186645	0.489087	0.501885	ENCFF703KOJ	CHIP:H3K4me3:C57BL/6 stomach postnatal (0 days)
971	1.94808	1.91128	0.0368044	0.717781	0.708472	0.00930899	0.150796	0.299225	0.382365	0.679898	0.501881	ENCFF463JGO	CHIP:H3K9ac:C57BL/6 intestine embryo (16.5 days)
546	1.57905	1.54563	0.0334262	0.752784	0.746705	0.00607926	0.151239	0.299742	0.330896	0.635861	0.501878	ENCFF518FTX	CHIP:H3K27me3:C57BL/6 stomach embryo (14.5 days)
468	0.497866	0.495628	0.00223795	0.359633	0.358703	0.000930369	0.151941	0.30077	0.501649	0.765739	0.501872	ENCFF162FEM	CHIP:E2F4:B10.H-2aH-4bp/Wts CH12.LX
60	0.221752	0.215415	0.00633667	0.154978	0.149711	0.00526638	0.15293	0.302362	0.409546	0.706811	0.501865	ENCFF943PHW	DNASE:C57BL/6 hindbrain embryo (11.5 days)
627	2.30458	2.18871	0.115867	0.688725	0.677296	0.0114285	0.154216	0.304539	0.653602	0.84812	0.501855	ENCFF900GLU	CHIP:H3K4me2:C57BL/6 embryonic facial prominence embryo (15.5 days)
1159	4.45497	4.3365	0.118476	1.16713	1.15782	0.00930953	0.155104	0.305337	0.531212	0.778886	0.501848	GSM1479713	CHIP:PolII:PolII ZT 18 WT / Liver, WT, ZT 18, PolII ChIP / .
10	0.230165	0.225284	0.00488131	0.164555	0.162068	0.00248699	0.155195	0.305337	0.715636	0.879058	0.501847	ENCFF680PQC	DNASE:129 ES-CJ7
513	3.26676	3.17291	0.0938461	1.09715	1.08839	0.00875735	0.155353	0.305337	0.183937	0.487644	0.501846	ENCFF672JMP	CHIP:H3K27me3:C57BL/6 embryonic facial prominence embryo (13.5 days)
251	3.53394	3.31153	0.222412	1.11048	1.10022	0.0102634	0.155514	0.305337	0.435554	0.733213	0.501845	ENCFF046UQY	CHIP:H3K36me3:C3H myocyte originated from C2C12
715	1.86217	1.83577	0.0264038	0.618096	0.606336	0.0117598	0.155549	0.305337	0.415079	0.71436	0.501844	ENCFF768DOK	CHIP:H3K4me2:C57BL/6 hindbrain embryo (11.5 days)
822	2.36047	2.45199	-0.0915139	0.655992	0.648272	0.00772023	0.155967	0.305793	0.431789	0.730839	0.501841	ENCFF724CMA	CHIP:H3K4me3:C57BL/6 midbrain embryo (15.5 days)
11	0.236356	0.233732	0.00262491	0.1812	0.178562	0.00263779	0.156789	0.306747	0.487298	0.76067	0.501835	ENCFF872IES	DNASE:129 ES-E14
220	0.0882921	0.0882044	8.7671e-05	0.0758303	0.0761492	-0.000318877	0.156827	0.306747	0.184505	0.487644	0.501835	UW6.1	ATAC:Enterocytes-clusters_6-cluster_1
694	2.71115	2.61457	0.0965812	0.968385	0.961507	0.00687784	0.157841	0.308362	0.437288	0.733943	0.501827	ENCFF597HKP	CHIP:H3K27me3:C57BL/6 forebrain embryo (12.5 days)
364	0.80248	0.795768	0.00671196	0.497232	0.494503	0.002729	0.158066	0.308435	0.557631	0.793679	0.501825	ENCFF218UAZ	CHIP:POLR2A:DBA/2 MEL cell line
357	4.48757	4.37051	0.117053	1.12176	1.11484	0.00692058	0.158283	0.308493	0.684454	0.863033	0.501824	ENCFF012PBY	CHIP:H3K27ac:C57BL/6 brown adipose tissue male adult (24 weeks)
800	0.48756	0.484933	0.0026274	0.349549	0.349519	2.91467e-05	0.159109	0.309381	0.529638	0.777753	0.501818	ENCFF665UTM	CHIP:EP300:C57BL/6 stomach postnatal (0 days)
777	1.22192	1.2232	-0.00127769	0.507962	0.505631	0.00233096	0.159116	0.309381	0.445684	0.736122	0.501817	ENCFF739QBQ	CHIP:CTCF:C57BL/6 lung postnatal (0 days)
331	2.45268	2.40083	0.0518522	0.845681	0.839603	0.00607777	0.159459	0.309641	0.483357	0.76067	0.501815	ENCFF924IWW	CHIP:H3K27ac:C57BL/6 placenta female adult (8 weeks)
838	2.03488	1.98883	0.0460571	0.884854	0.877079	0.00777584	0.159685	0.309641	0.435018	0.733213	0.501813	ENCFF893IAL	CHIP:H3K27me3:C57BL/6 intestine embryo (16.5 days)
887	2.84208	2.91897	-0.0768831	0.785526	0.778196	0.0073294	0.159815	0.309641	0.656093	0.84812	0.501812	ENCFF197CLN	CHIP:H3K4me3:C57BL/6 midbrain embryo (10.5 days)
1034	1.91876	1.79417	0.124594	0.805908	0.796123	0.00978446	0.161656	0.31284	0.657923	0.848965	0.501798	ENCFF923CRK	CHIP:H3K36me3:C57BL/6 limb embryo (11.5 days)
53	0.242432	0.233505	0.00892679	0.165605	0.160489	0.00511669	0.162145	0.313417	0.448799	0.737443	0.501795	ENCFF373NJX	DNASE:C57BL/6 embryonic facial prominence embryo (11.5 days)
662	2.12227	2.06308	0.0591908	0.869857	0.862851	0.00700587	0.162795	0.313739	0.631001	0.843559	0.50179	ENCFF983GFL	CHIP:H3K27me3:C57BL/6 embryonic facial prominence embryo (12.5 days)
850	0.551589	0.544151	0.00743818	0.402308	0.397982	0.00432599	0.162932	0.313739	0.278866	0.598658	0.501789	ENCFF064FUW	CHIP:CHD2:129 ES-E14
294	0.621418	0.629868	-0.00845033	0.403614	0.401993	0.00162107	0.162957	0.313739	0.329432	0.634533	0.501789	ENCFF156BYW	CHIP:CTCF:C57BL/6 bone marrow male adult (8 weeks)
897	0.663422	0.64638	0.0170417	0.423695	0.4218	0.00189564	0.163182	0.313739	0.564258	0.797828	0.501787	ENCFF738IHC	CHIP:MAFK:129 ES-E14
990	2.2601	2.1075	0.152598	0.877608	0.868576	0.00903195	0.163366	0.313739	0.544922	0.783295	0.501786	ENCFF110NKA	CHIP:H3K36me3:C57BL/6 lung embryo (15.5 days)
377	2.44715	2.25421	0.192946	0.847977	0.84014	0.00783706	0.163786	0.313739	0.23256	0.545786	0.501783	ENCFF287DIJ	CHIP:H3K36me3:C57BL/6 thymus male adult (8 weeks)
903	1.20472	1.1791	0.025623	0.628681	0.62157	0.00711119	0.163829	0.313739	0.366004	0.66594	0.501782	ENCFF925YTU	CHIP:H3K4me1:C57BL/6 hindbrain postnatal (0 days)
640	2.31157	2.25116	0.0604153	0.941054	0.932453	0.00860059	0.163839	0.313739	0.455359	0.741482	0.501782	ENCFF755WDT	CHIP:H3K27me3:C57BL/6 limb embryo (15.5 days)
1025	1.91015	1.87691	0.0332408	0.865164	0.862094	0.00307006	0.164107	0.313885	0.310655	0.620284	0.50178	ENCFF289ATH	CHIP:H3K9me3:129 E14TG2a.4
1181	1.85101	1.82624	0.0247698	0.65731	0.649627	0.0076834	0.166782	0.318404	0.365213	0.665771	0.501761	GSM1479735	CHIP:H3K27ac:H3K27ac ZT 22 Bmal1 KO / Liver, Bmal1 KO, ZT 22, H3K27ac ChIP / .
564	2.0344	1.96372	0.0706875	0.784212	0.776745	0.00746667	0.167049	0.318404	0.639003	0.845394	0.501759	ENCFF731BDW	CHIP:H3K27me3:C57BL/6 limb embryo (11.5 days)
1110	2.4454	2.45663	-0.0112302	0.703997	0.696212	0.00778437	0.167051	0.318404	0.761393	0.898039	0.501759	ENCFF727YWB	CHIP:H3K4me3:C57BL/6 embryonic facial prominence embryo (15.5 days)
1461	2.45405	2.37603	0.0780201	0.906258	0.897558	0.00870025	0.167902	0.319657	0.222451	0.536125	0.501753	CNhs11135	CAGE:cerebellum, neonate N30
419	0.305783	0.306498	-0.000715375	0.257969	0.258172	-0.000203371	0.168287	0.319871	0.245692	0.561418	0.50175	ENCFF860JAB	CHIP:GATA1:129 G1E
289	1.22426	1.21228	0.011979	0.652027	0.646555	0.00547242	0.168425	0.319871	0.408919	0.706811	0.501749	ENCFF295HDA	CHIP:H3K4me1:C57BL/6 ES-Bruce4
308	2.79851	2.69534	0.103166	0.993758	0.982906	0.0108513	0.168599	0.319871	0.142914	0.429265	0.501748	ENCFF669DNL	CHIP:H3K27ac:C57BL/6 olfactory bulb male adult (8 weeks)
708	0.872462	0.87106	0.00140232	0.570882	0.571502	-0.000620067	0.168966	0.320197	0.0535877	0.244569	0.501745	ENCFF919YGD	CHIP:H3K9me3:C57BL/6 embryonic facial prominence embryo (12.5 days)
829	1.78038	1.73095	0.0494224	0.743914	0.734782	0.00913179	0.169657	0.321136	0.371796	0.671784	0.50174	ENCFF905MWT	CHIP:H3K4me1:C57BL/6 forebrain embryo (13.5 days)
804	3.01024	2.93083	0.0794067	1.07179	1.06323	0.00855899	0.170816	0.322958	0.466648	0.748738	0.501732	ENCFF344FSI	CHIP:H3K27me3:C57BL/6 embryonic facial prominence embryo (14.5 days)
1044	1.06772	1.0627	0.00502133	0.653199	0.652733	0.000465393	0.171201	0.323315	0.1457	0.431324	0.501729	ENCFF052RHA	CHIP:H3K9me3:C57BL/6 forebrain embryo (11.5 days)
307	0.722521	0.726773	-0.00425196	0.465578	0.46247	0.00310811	0.171904	0.323829	0.430074	0.729217	0.501724	ENCFF320LZI	CHIP:EP300:C57BL/6 ES-Bruce4
391	2.42323	2.43452	-0.0112932	0.755542	0.751086	0.00445569	0.172101	0.323829	0.405242	0.703819	0.501722	ENCFF857GJE	CHIP:H3K4me3:129 ES-E14
1076	2.63248	2.64963	-0.0171499	0.722581	0.714736	0.00784421	0.172253	0.323829	0.504947	0.767806	0.501721	ENCFF455WJT	CHIP:H3K4me3:C57BL/6 kidney embryo (16.5 days)
1115	0.355543	0.354633	0.000909835	0.299742	0.297565	0.00217691	0.172262	0.323829	0.570977	0.801853	0.501721	GSM1176709	CHIP:SREBP1:SREBP1 (ZT02) / SREBP1_ZT02, liver cells / .
14	0.399416	0.383498	0.0159176	0.227976	0.223081	0.00489494	0.173054	0.324946	0.365505	0.665771	0.501716	ENCFF391SPW	DNASE:C57BL/6 fibroblast of lung male adult (8 weeks)
1210	0.727165	0.760206	-0.0330409	0.495584	0.497819	-0.00223523	0.175037	0.328293	0.173975	0.474819	0.501702	GSM2390533	CHIP:.:ChIP-seq Rpc4 , ZT06, rep1, CONSTANTLY FED / Liver / .
1126	1.88413	1.83702	0.0471114	0.73543	0.727407	0.00802374	0.175386	0.328573	0.559992	0.793701	0.501699	GSM1176726	CHIP:RPB2:Polr2b (ZT22) / RPB2_ZT22, liver cells / .
403	5.12061	4.64191	0.478705	1.1139	1.09917	0.0147283	0.175759	0.328898	0.270043	0.590001	0.501696	ENCFF034FFR	CHIP:H3K36me3:CD-1 erythroblast embryo (14.5 days)
1223	1.76804	1.79763	-0.0295897	0.872783	0.870035	0.00274807	0.176513	0.329568	0.311378	0.620284	0.501691	GSM2390585	CHIP:.:ChIP-seq Rpc4 , ZT06, rep1, Maf1 KO / Liver / .
1040	3.31776	3.17946	0.1383	0.819812	0.809248	0.0105646	0.176678	0.329568	0.669109	0.85408	0.50169	ENCFF911YHS	CHIP:H3K4me2:C57BL/6 embryonic facial prominence embryo (14.5 days)
347	4.45527	4.22769	0.227586	1.15402	1.14653	0.00749815	0.176719	0.329568	0.473632	0.755511	0.50169	ENCFF093JJJ	CHIP:H3K36me3:C57BL/6 liver male adult (8 weeks)
415	6.48529	6.46677	0.0185161	1.65486	1.64765	0.00721359	0.177501	0.33065	0.163125	0.459717	0.501684	ENCFF541KFF	CHIP:H3K27me3:129 G1E
682	2.86122	2.72813	0.133085	0.775044	0.765563	0.00948048	0.177928	0.331071	0.682847	0.863033	0.501681	ENCFF950JKI	CHIP:H3K4me2:C57BL/6 stomach embryo (16.5 days)
773	1.05353	1.04699	0.00654292	0.53252	0.5277	0.00481921	0.178662	0.331719	0.790029	0.912812	0.501676	ENCFF104WUV	CHIP:H3K9ac:C57BL/6 intestine embryo (15.5 days)
159	0.115265	0.114502	0.000763044	0.107333	0.106603	0.000730105	0.17868	0.331719	0.592087	0.818166	0.501676	UW14.2	ATAC:Sperm-clusters_14-cluster_2
1640	1.04309	0.953405	0.0896825	0.396809	0.389651	0.00715834	0.178988	0.331915	0.649506	0.846326	0.501674	CNhs14341	CAGE:natural helper cells, naive, biol_, tech_
320	2.49195	2.41788	0.0740755	0.951525	0.944837	0.00668812	0.179606	0.332578	0.587166	0.814105	0.50167	ENCFF234IJR	CHIP:H3K27ac:C57BL/6 cerebellum male adult (8 weeks)
868	1.45444	1.42154	0.0329024	0.667612	0.660458	0.00715369	0.17975	0.332578	0.529634	0.777753	0.501669	ENCFF586OQX	CHIP:H3K4me1:C57BL/6 forebrain embryo (14.5 days)
1257	2.93266	2.88025	0.052403	0.953845	0.947983	0.00586224	0.180113	0.332874	0.409031	0.706811	0.501666	GSM864683	CHIP:.:RNAPolII ChIP WT T0901317 replicate 1 / C57BL/6 wild type mouse liver / .
659	1.96826	1.90455	0.0637109	0.786382	0.776265	0.0101168	0.180604	0.333407	0.510056	0.76908	0.501663	ENCFF704PEM	CHIP:H3K4me1:C57BL/6 midbrain embryo (13.5 days)
197	0.203802	0.195919	0.00788231	0.148065	0.144118	0.00394773	0.181029	0.333746	0.323975	0.62993	0.50166	UW26.2	ATAC:Collisions-clusters_26-cluster_2
225	0.089858	0.0871208	0.00273716	0.0768633	0.0752923	0.001571	0.181194	0.333746	0.450761	0.738828	0.501659	UW9.1	ATAC:Unknown-clusters_9-cluster_1
1170	5.28862	5.27502	0.0136046	1.13851	1.13062	0.00789011	0.182602	0.33559	0.50564	0.767806	0.501649	GSM1479724	CHIP:H3K27ac:H3K27ac ZT 6 WT / Liver, WT, ZT 6, H3K27ac ChIP / .
560	1.54591	1.40944	0.136475	0.60849	0.603131	0.00535935	0.182603	0.33559	0.499917	0.765484	0.501649	ENCFF518VSR	CHIP:H3K27ac:C57BL/6 liver embryo (14.5 days)
745	2.45683	2.30346	0.153373	0.93087	0.921861	0.00900894	0.183167	0.336249	0.477811	0.756304	0.501645	ENCFF363RRH	CHIP:H3K36me3:C57BL/6 kidney postnatal (0 days)
1093	2.8831	2.6733	0.209797	0.90335	0.894206	0.00914359	0.183725	0.336898	0.728696	0.88423	0.501641	ENCFF789SIC	CHIP:H3K36me3:DBA/2 MEL cell line
576	1.52794	1.49505	0.0328894	0.746179	0.742491	0.00368857	0.184078	0.337024	0.374956	0.672546	0.501639	ENCFF223PHS	CHIP:H3K27me3:C57BL/6 neural tube embryo (14.5 days)
882	2.60741	2.47901	0.1284	0.69281	0.685345	0.00746512	0.184204	0.337024	0.767549	0.900948	0.501638	ENCFF960DLF	CHIP:H3K4me3:C57BL/6 liver embryo (15.5 days)
323	3.45379	3.2869	0.166886	0.961315	0.955734	0.00558048	0.184991	0.338087	0.801673	0.916618	0.501632	ENCFF691YDA	CHIP:H3K27ac:C57BL/6 heart male adult (8 weeks)
1208	1.36762	1.40779	-0.0401722	0.773016	0.771586	0.00142944	0.185421	0.338496	0.129794	0.407071	0.50163	GSM2390513	CHIP:.:ChIP-seq Rpc4 , ZT22, rep1, CONTROL / Liver / .
35	0.21549	0.210532	0.00495794	0.152905	0.150182	0.00272273	0.186021	0.338714	0.286301	0.60532	0.501625	ENCFF259ZNG	DNASE:C57BL/6 retina male adult (8 weeks)
1147	7.63143	7.46012	0.171317	1.51732	1.50882	0.00849497	0.186059	0.338714	0.732534	0.885069	0.501625	GSM1446069	CHIP:RNAPII:ChIP-seq, Liver_RNAPII_WT_pred_6am / Liver tissue / .
1004	1.98432	1.84354	0.140774	0.690467	0.682555	0.00791162	0.186159	0.338714	0.643917	0.846135	0.501625	ENCFF526VAG	CHIP:H3K27ac:C57BL/6 liver embryo (16.5 days)
1059	3.19156	3.06334	0.128213	0.807858	0.797813	0.0100443	0.186496	0.338952	0.713397	0.878906	0.501622	ENCFF045FHU	CHIP:H3K4me2:C57BL/6 lung embryo (14.5 days)
387	1.87546	1.78861	0.0868496	0.649016	0.642836	0.00617969	0.186822	0.33917	0.709183	0.87674	0.50162	ENCFF500BXF	CHIP:H3K4me3:B10.H-2aH-4bp/Wts CH12.LX
609	1.05639	1.05596	0.000430584	0.451529	0.446708	0.00482097	0.187067	0.33921	0.52691	0.777753	0.501618	ENCFF251FHP	CHIP:CTCF:C57BL/6 hindbrain postnatal (0 days)
884	2.08247	2.07312	0.00935626	0.661352	0.649567	0.011785	0.187257	0.33921	0.20273	0.508327	0.501617	ENCFF161KBG	CHIP:H3K4me2:C57BL/6 neural tube embryo (14.5 days)
854	1.92256	1.92682	-0.0042516	0.63358	0.626647	0.00693244	0.187479	0.339237	0.544801	0.783295	0.501616	ENCFF376RQB	CHIP:H3K4me3:C57BL/6 kidney postnatal (0 days)
668	1.38172	1.35925	0.0224645	0.586559	0.577176	0.00938332	0.188432	0.340587	0.457017	0.742644	0.501609	ENCFF657UHZ	CHIP:H3K9ac:C57BL/6 intestine embryo (14.5 days)
1128	7.30691	7.23153	0.0753813	1.4293	1.42189	0.00740707	0.189765	0.34262	0.837598	0.932367	0.5016	GSM1198157	CHIP:H3K9ac:H3K9ac ChIPSeq WT_cohort1 / H3K9ac ChIPSeq WT_cohort1 / .
1158	3.67951	3.58332	0.0961962	1.07766	1.06859	0.00906992	0.190453	0.343484	0.739455	0.885069	0.501596	GSM1479712	CHIP:PolII:PolII ZT 14 WT / Liver, WT, ZT 14, PolII ChIP / .
644	3.60437	3.37265	0.231715	1.12791	1.1184	0.00950301	0.191827	0.345228	0.476008	0.756304	0.501586	ENCFF690EIB	CHIP:H3K36me3:C57BL/6 heart postnatal (0 days)
398	3.19712	2.96436	0.232766	0.69237	0.683852	0.0085175	0.19184	0.345228	0.779772	0.907129	0.501586	ENCFF612WPA	CHIP:H3K4me3:CD-1 erythroblast embryo (14.5 days)
1081	1.17858	1.1755	0.00307345	0.57169	0.564708	0.00698274	0.193017	0.346967	0.307898	0.620284	0.501578	ENCFF420WNH	CHIP:H3K9ac:C57BL/6 kidney embryo (15.5 days)
530	1.26406	1.26449	-0.0004251	0.720816	0.722346	-0.00153053	0.193667	0.347587	0.0592237	0.258789	0.501574	ENCFF101ASP	CHIP:H3K9me3:C57BL/6 forebrain embryo (13.5 days)
82	0.264457	0.253554	0.0109034	0.173134	0.167488	0.00564617	0.193798	0.347587	0.446251	0.736135	0.501573	ENCFF846VXR	DNASE:C57BL/6 embryo embryo (11 day)
984	1.10178	1.10075	0.00102925	0.660167	0.661562	-0.00139493	0.193997	0.347587	0.11962	0.389242	0.501572	ENCFF432ADZ	CHIP:H3K9me3:C57BL/6 midbrain embryo (12.5 days)
360	4.70514	4.7784	-0.0732622	1.01276	1.00856	0.00420547	0.194406	0.347917	0.782404	0.907831	0.501569	ENCFF668SMR	CHIP:H3K27ac:C57BL/6 bone marrow macrophage male adult (8 weeks)
171	0.305026	0.290918	0.0141078	0.186666	0.184625	0.00204106	0.194605	0.347917	0.24111	0.556382	0.501568	UW17.5	ATAC:Collisions-clusters_17-cluster_5
664	1.88405	1.83419	0.0498621	0.78694	0.780788	0.00615185	0.196723	0.351322	0.602564	0.824324	0.501554	ENCFF218NHY	CHIP:H3K4me1:C57BL/6 embryonic facial prominence embryo (13.5 days)
537	1.23817	1.21283	0.0253413	0.623229	0.620612	0.00261652	0.196968	0.351376	0.512709	0.770001	0.501552	ENCFF887SQZ	CHIP:H3K4me1:C57BL/6 intestine embryo (15.5 days)
290	1.54378	1.53578	0.00800169	0.608962	0.604111	0.00485122	0.198007	0.352848	0.834621	0.931989	0.501546	ENCFF363JJV	CHIP:H3K4me3:C57BL/6 ES-Bruce4
63	0.198887	0.192918	0.00596973	0.150489	0.146008	0.00448106	0.199009	0.354132	0.446705	0.736145	0.501539	ENCFF625SMQ	DNASE:C57BL/6 limb embryo (10.50 days)
284	1.92693	1.89319	0.0337391	0.605926	0.602596	0.00332999	0.199159	0.354132	0.34229	0.647739	0.501538	ENCFF753IXB	CHIP:H3K4me3:C57BL/6 liver male adult (8 weeks)
69	0.229811	0.228266	0.0015453	0.165857	0.163278	0.00257821	0.199616	0.354377	0.715173	0.879058	0.501535	ENCFF622EDP	DNASE:C57BL/6 intestine embryo (14.50 days)
981	3.001	3.03887	-0.0378664	0.834077	0.827134	0.00694287	0.199728	0.354377	0.70895	0.87674	0.501534	ENCFF675TVC	CHIP:H3K4me3:C57BL/6 embryonic facial prominence embryo (10.5 days)
370	2.13174	1.95057	0.181166	0.787039	0.780817	0.00622255	0.200163	0.354424	0.338619	0.644056	0.501531	ENCFF109YST	CHIP:H3K36me3:C57BL/6 ES-Bruce4
433	1.37481	1.3335	0.0413054	0.576137	0.570306	0.00583166	0.200186	0.354424	0.585045	0.812534	0.501531	ENCFF299BAW	CHIP:H3K4me3:129 G1E-ER4 treated with 10 nM 17B-estradiol for 24 hours
367	3.09857	2.88043	0.21814	0.924122	0.914672	0.00944942	0.200563	0.354709	0.355442	0.656573	0.501529	ENCFF863PEU	CHIP:H3K36me3:B10.H-2aH-4bp/Wts CH12.LX
1033	1.73866	1.70316	0.0354985	0.807662	0.801668	0.00599408	0.201066	0.355216	0.674497	0.857076	0.501526	ENCFF270YCY	CHIP:H3K27me3:C57BL/6 intestine embryo (15.5 days)
157	0.14535	0.13783	0.00752053	0.108185	0.105706	0.00247842	0.201997	0.356041	0.43192	0.730839	0.50152	UW13.1	ATAC:Erythroblasts-clusters_13-cluster_1
153	0.284079	0.269357	0.0147215	0.17529	0.173035	0.00225478	0.202012	0.356041	0.480967	0.759106	0.501519	UW12.2	ATAC:Regulatory_T_cells-clusters_12-cluster_2
562	2.20924	2.10576	0.103478	0.674503	0.665408	0.00909472	0.202183	0.356041	0.638451	0.845394	0.501518	ENCFF592XTS	CHIP:H3K4me2:C57BL/6 stomach embryo (14.5 days)
776	1.71441	1.67125	0.043162	0.752556	0.7435	0.00905627	0.204924	0.360153	0.330816	0.635861	0.501501	ENCFF056IYN	CHIP:H3K4me1:C57BL/6 hindbrain embryo (14.5 days)
1258	2.31243	2.27989	0.0325353	0.844638	0.839487	0.00515109	0.205174	0.360153	0.633609	0.843614	0.501499	GSM864685	CHIP:.:RNAPolII ChIP LXRdKO Control replicate 1 / C57BL/6 LXRdKO mouse liver / .
1039	2.75315	2.63646	0.116688	0.848796	0.841792	0.00700426	0.205176	0.360153	0.834438	0.931989	0.501499	ENCFF924XGB	CHIP:H3K27ac:C57BL/6 lung postnatal (0 days)
1100	1.22478	1.18095	0.0438322	0.606555	0.596718	0.00983727	0.20558	0.360478	0.29284	0.611356	0.501497	ENCFF260BXV	CHIP:H3K4me1:C57BL/6 forebrain embryo (11.5 days)
219	0.227681	0.22313	0.00455101	0.181735	0.178057	0.00367874	0.207241	0.362066	0.378612	0.676888	0.501486	UW5.6	ATAC:Unknown-clusters_5-cluster_6
611	2.96691	2.838	0.128905	0.772684	0.764861	0.00782257	0.207433	0.362066	0.286128	0.60532	0.501485	ENCFF957GWA	CHIP:H3K4me2:C57BL/6 lung embryo (16.5 days)
184	0.186474	0.180894	0.00557947	0.143658	0.141129	0.00252827	0.207574	0.362066	0.515587	0.770304	0.501484	UW21.2	ATAC:Oligodendrocytes-clusters_21-cluster_2
81	0.209775	0.202	0.00777528	0.150078	0.144887	0.0051917	0.207581	0.362066	0.245684	0.561418	0.501484	ENCFF327SCP	DNASE:C57BL/6 midbrain embryo (10.50 days)
1173	5.49085	5.4821	0.00875092	1.18834	1.1808	0.0075376	0.207879	0.362066	0.666372	0.852943	0.501482	GSM1479727	CHIP:H3K27ac:H3K27ac ZT 18 WT / Liver, WT, ZT 18, H3K27ac ChIP / .
287	1.89816	1.82985	0.0683097	0.568344	0.557802	0.0105421	0.207937	0.362066	0.465245	0.748585	0.501482	ENCFF379VFT	CHIP:H3K4me3:C57BL/6 embryonic fibroblast male embryo (13.5 weeks)
54	0.272621	0.265205	0.00741616	0.173538	0.170061	0.00347698	0.208126	0.362066	0.57206	0.802643	0.50148	ENCFF540VTK	DNASE:C57BL/6 liver postnatal (0 days)
1266	1.19477	1.16902	0.0257521	0.584004	0.57777	0.00623387	0.208248	0.362066	0.374905	0.672546	0.50148	GSM874951	CHIP:RPB2:Polr2b_ZT06 / RPB2 IP / .
885	1.24027	1.23959	0.000680685	0.711479	0.712037	-0.000557959	0.208945	0.362562	0.242313	0.557302	0.501475	ENCFF828TZR	CHIP:H3K9me3:C57BL/6 lung embryo (16.5 days)
341	1.29758	1.27286	0.0247178	0.70076	0.694272	0.00648803	0.208975	0.362562	0.45303	0.739889	0.501475	ENCFF333YCZ	CHIP:POLR2A:C57BL/6 testis male adult (8 weeks)
277	2.05814	1.94844	0.109702	0.625946	0.62097	0.00497651	0.20962	0.36301	0.717278	0.879058	0.501471	ENCFF620KTZ	CHIP:H3K4me3:C57BL/6 bone marrow male adult (8 weeks)
329	2.02269	1.95948	0.0632143	0.751143	0.74572	0.00542241	0.209676	0.36301	0.293667	0.611744	0.50147	ENCFF415BLI	CHIP:H3K4me1:C57BL/6 heart embryo (14.5 days)
797	1.30277	1.25495	0.0478184	0.624714	0.616225	0.00848883	0.212623	0.367725	0.302639	0.620284	0.501452	ENCFF813VAT	CHIP:H3K4me1:C57BL/6 neural tube embryo (11.5 days)
389	2.44991	2.29941	0.150502	0.793351	0.790174	0.00317621	0.213302	0.368512	0.438816	0.734191	0.501448	ENCFF840JAO	CHIP:H3K79me2:B10.H-2aH-4bp/Wts CH12.LX
1098	2.98298	2.9295	0.0534782	1.08284	1.07608	0.00676239	0.214906	0.37052	0.59959	0.822309	0.501438	ENCFF633GEF	CHIP:H3K27me3:C57BL/6 liver postnatal (0 days)
772	1.75693	1.7846	-0.0276664	0.599941	0.595074	0.00486642	0.214915	0.37052	0.754681	0.893329	0.501438	ENCFF525EWD	CHIP:H3K4me3:C57BL/6 intestine embryo (15.5 days)
1176	3.44831	3.40879	0.0395255	0.857459	0.848627	0.00883138	0.215918	0.371858	0.532373	0.778886	0.501431	GSM1479730	CHIP:H3K27ac:H3K27ac ZT 2 Bmal1 KO / Liver, Bmal1 KO, ZT 2, H3K27ac ChIP / .
200	0.184187	0.182937	0.00125045	0.152097	0.150154	0.00194308	0.218357	0.375665	0.548994	0.787771	0.501416	UW27.2	ATAC:Collisions-clusters_27-cluster_2
740	1.13141	1.10396	0.027457	0.566587	0.562316	0.00427097	0.218762	0.375676	0.403697	0.703367	0.501414	ENCFF820UTZ	CHIP:H3K9ac:C57BL/6 lung postnatal (0 days)
1131	5.09439	5.05265	0.0417476	1.16796	1.16238	0.00558054	0.21882	0.375676	0.477517	0.756304	0.501413	GSM1198162	CHIP:H3K9ac:H3K9ac ChIPSeq YF_cohort2 / H3K9ac ChIPSeq YF_cohort2 / .
923	2.33637	2.25669	0.0796762	0.684542	0.674957	0.00958461	0.219784	0.376937	0.524532	0.77585	0.501407	ENCFF774ZAY	CHIP:H3K4me2:C57BL/6 kidney embryo (14.5 days)
1161	3.60232	3.51242	0.0898995	1.05645	1.04829	0.00816453	0.220189	0.377236	0.611784	0.831398	0.501405	GSM1479715	CHIP:PolII:PolII ZT 26 WT / Liver, WT, ZT 26, PolII ChIP / .
333	1.58446	1.6347	-0.0502423	0.440334	0.43999	0.000343561	0.220821	0.377925	0.296402	0.614384	0.501401	ENCFF235ZAJ	CHIP:H3K4me3:C57BL/6 placenta female adult (8 weeks)
631	2.06005	2.0545	0.00554228	0.662072	0.656382	0.00569063	0.222069	0.379666	0.404934	0.703819	0.501393	ENCFF115TVW	CHIP:H3K4me3:C57BL/6 intestine postnatal (0 days)
782	2.21765	2.15623	0.0614228	0.850691	0.842812	0.00787842	0.22294	0.380759	0.311356	0.620284	0.501388	ENCFF255RIU	CHIP:H3K4me1:C57BL/6 limb embryo (13.5 days)
411	3.32507	3.2065	0.118569	0.83028	0.824542	0.00573885	0.225496	0.384724	0.685418	0.863033	0.501373	ENCFF211IXB	CHIP:H3K4me3:CD-1 megakaryocyte embryo (14.5 days)
529	1.59057	1.55336	0.0372112	0.707817	0.700925	0.00689137	0.225816	0.38487	0.655851	0.84812	0.501371	ENCFF044DZV	CHIP:H3K4me1:C57BL/6 midbrain embryo (14.5 days)
753	1.54576	1.55419	-0.0084312	0.645889	0.638586	0.0073036	0.226155	0.384885	0.524564	0.77585	0.501369	ENCFF421NWC	CHIP:H3K9ac:C57BL/6 forebrain embryo (13.5 days)
154	0.246327	0.23579	0.0105364	0.156984	0.155497	0.00148766	0.226293	0.384885	0.661981	0.850379	0.501368	UW12.3	ATAC:NK_cells-clusters_12-cluster_3
671	1.29618	1.25582	0.0403545	0.637062	0.629328	0.00773424	0.227642	0.386445	0.402342	0.701749	0.50136	ENCFF428RXK	CHIP:H3K4me1:C57BL/6 neural tube embryo (12.5 days)
799	1.48398	1.42349	0.060491	0.656305	0.646131	0.0101743	0.22795	0.386445	0.179771	0.484202	0.501358	ENCFF554FAE	CHIP:H3K4me1:C57BL/6 midbrain embryo (11.5 days)
1116	0.460463	0.461085	-0.000622153	0.363983	0.361899	0.0020833	0.228069	0.386445	0.488696	0.76067	0.501357	GSM1176710	CHIP:SREBP1:SREBP1 (ZT06) / SREBP1_ZT06, liver cells / .
6	0.223569	0.207783	0.015786	0.135127	0.131384	0.00374325	0.228507	0.386445	0.559372	0.793701	0.501354	ENCFF990TBH	DNASE:CD-1 c-Kit-negative CD71-positive TER-119-positive erythroid progenitor cells male embryo (14.5 days)
817	2.08496	1.92426	0.160702	0.710338	0.702786	0.00755191	0.228514	0.386445	0.569683	0.801853	0.501354	ENCFF290NHP	CHIP:H3K27ac:C57BL/6 liver embryo (15.5 days)
764	2.91656	2.78669	0.129874	0.75502	0.747195	0.00782555	0.228776	0.386445	0.794478	0.914167	0.501353	ENCFF645JTI	CHIP:H3K4me2:C57BL/6 lung embryo (15.5 days)
518	1.39131	1.39022	0.0010854	0.759816	0.760648	-0.000831962	0.229021	0.386445	0.216477	0.526667	0.501351	ENCFF577WZP	CHIP:H3K9me3:C57BL/6 limb embryo (13.5 days)
1270	1.90669	1.85965	0.0470365	0.739878	0.732046	0.00783265	0.229092	0.386445	0.580015	0.807422	0.501351	GSM874955	CHIP:RPB2:Polr2b_ZT22 / RPB2 IP / .
922	2.59956	2.54927	0.0502887	1.02788	1.02448	0.00339699	0.229811	0.387218	0.351555	0.653099	0.501347	ENCFF935NKI	CHIP:H3K27me3:C57BL/6 forebrain embryo (16.5 days)
434	2.40809	2.30452	0.103572	0.677321	0.669231	0.0080905	0.230021	0.387218	0.428111	0.726639	0.501345	ENCFF249XCU	CHIP:H3K4me3:129 G1E
651	1.55655	1.50413	0.0524193	0.690562	0.681032	0.00953037	0.231247	0.388883	0.259657	0.578072	0.501338	ENCFF193NMX	CHIP:H3K4me1:C57BL/6 forebrain embryo (12.5 days)
713	2.51098	2.54563	-0.0346553	0.710928	0.704788	0.00613964	0.232305	0.390061	0.717392	0.879058	0.501332	ENCFF354BAJ	CHIP:H3K4me3:C57BL/6 kidney embryo (15.5 days)
616	2.88919	2.86048	0.0287101	0.745716	0.734181	0.0115352	0.232422	0.390061	0.506988	0.76908	0.501331	ENCFF087LVF	CHIP:H3K4me2:C57BL/6 hindbrain embryo (16.5 days)
587	2.73371	2.72271	0.0110061	0.718046	0.712755	0.0052911	0.23326	0.391067	0.575486	0.8047	0.501326	ENCFF808VAT	CHIP:H3K4me3:C57BL/6 heart embryo (16.5 days)
187	0.294235	0.294237	-1.60933e-06	0.18502	0.185507	-0.000487432	0.235275	0.394044	0.897566	0.955736	0.501314	UW22.3	ATAC:Endothelial_I_cells-clusters_22-cluster_3
1271	2.30828	2.25168	0.0565922	0.823434	0.815246	0.00818771	0.236015	0.39488	0.304714	0.620284	0.50131	GSM874956	CHIP:RPB2:Polr2b_ZT26 / RPB2 IP / .
944	2.01519	1.94942	0.0657718	0.796936	0.790908	0.00602889	0.236754	0.395713	0.720266	0.879849	0.501305	ENCFF422AUK	CHIP:H3K27me3:C57BL/6 embryonic facial prominence embryo (11.5 days)
196	0.257988	0.243721	0.0142672	0.163281	0.16015	0.00313042	0.237853	0.397148	0.328259	0.634505	0.501299	UW26.1	ATAC:T_cells-clusters_26-cluster_1
1200	0.0145048	0.0152138	-0.000708964	0.0138533	0.0139747	-0.000121328	0.238717	0.398185	0.594667	0.819104	0.501294	GSM1855803	CHIP:HSF1:HSF1 ZT14 / Liver / .
1130	4.70495	4.66029	0.0446639	1.15213	1.14628	0.00584459	0.239355	0.398845	0.795162	0.914167	0.50129	GSM1198159	CHIP:H3K9ac:H3K9ac ChIPSeq KA_cohort1 / H3K9ac ChIPSeq KA_cohort1 / .
871	2.55668	2.39172	0.164957	0.951093	0.942394	0.00869834	0.239826	0.399224	0.586509	0.81388	0.501287	ENCFF309BMY	CHIP:H3K36me3:C57BL/6 heart embryo (15.5 days)
957	2.76881	2.82978	-0.0609634	0.787421	0.781245	0.00617677	0.240107	0.399287	0.7103	0.87746	0.501286	ENCFF863DGY	CHIP:H3K4me3:C57BL/6 hindbrain embryo (10.5 days)
1061	2.09592	2.05694	0.0389791	0.916709	0.913064	0.00364542	0.242078	0.402158	0.660864	0.850274	0.501274	ENCFF386EYG	CHIP:H3K27me3:C57BL/6 neural tube embryo (15.5 days)
175	0.225599	0.222	0.00359865	0.16005	0.158648	0.00140233	0.242386	0.402264	0.702962	0.872341	0.501272	UW18.4	ATAC:Distal_convoluted_tubule-clusters_18-cluster_4
1175	6.11032	6.08576	0.0245547	1.24049	1.23246	0.00802886	0.242707	0.40239	0.261315	0.578626	0.50127	GSM1479729	CHIP:H3K27ac:H3K27ac ZT 26 WT / Liver, WT, ZT 26, H3K27ac ChIP / .
665	3.33749	3.2012	0.136286	0.800098	0.79142	0.00867772	0.243961	0.40406	0.386565	0.683666	0.501263	ENCFF755OHM	CHIP:H3K4me2:C57BL/6 liver embryo (15.5 days)
1056	2.12074	2.05649	0.0642569	0.832191	0.821878	0.0103136	0.244895	0.4052	0.206705	0.512242	0.501258	ENCFF254FBD	CHIP:H3K4me1:C57BL/6 neural tube embryo (13.5 days)
1129	1.84007	1.83684	0.0032326	0.70172	0.699253	0.00246656	0.245477	0.405753	0.902228	0.957916	0.501254	GSM1198158	CHIP:H3K9ac:H3K9ac ChIPSeq HAHA_cohort1 / H3K9ac ChIPSeq HAHA_cohort1 / .
4	0.383395	0.370018	0.0133772	0.254636	0.250317	0.00431895	0.246974	0.407817	0.475087	0.756304	0.501246	ENCFF474GND	DNASE:C57BL/6 cerebellum male adult (8 weeks)
340	0.931064	0.943335	-0.0122713	0.538469	0.537552	0.000917196	0.247907	0.408948	0.588743	0.815245	0.50124	ENCFF946MNK	CHIP:CTCF:C57BL/6 testis male adult (8 weeks)
1127	7.54173	7.49922	0.0425043	1.42926	1.4233	0.00595748	0.248804	0.410015	0.864635	0.947064	0.501235	GSM1198156	CHIP:H3K9ac:H3K9ac ChIPSeq Cre_cohort1 / H3K9ac ChIPSeq Cre_cohort1 / .
1122	1.18085	1.15532	0.0255284	0.580199	0.574105	0.0060941	0.249989	0.411555	0.424558	0.722849	0.501228	GSM1176722	CHIP:RPB2:Polr2b (ZT06) / RPB2_ZT06, liver cells / .
382	0.860007	0.853309	0.00669789	0.538736	0.538715	2.13385e-05	0.252386	0.415086	0.539048	0.781002	0.501215	ENCFF443EON	CHIP:H3K27me3:C57BL/6 testis male adult (8 weeks)
812	2.39717	2.34583	0.0513492	0.983608	0.980377	0.00323057	0.252753	0.415128	0.49248	0.76067	0.501212	ENCFF025FNF	CHIP:H3K27me3:C57BL/6 midbrain embryo (16.5 days)
967	1.18783	1.1729	0.0149337	0.56341	0.557912	0.00549805	0.252928	0.415128	0.875768	0.948294	0.501211	ENCFF209EYY	CHIP:H3K9ac:C57BL/6 lung embryo (15.5 days)
346	1.67341	1.68942	-0.0160073	0.792461	0.792188	0.000272751	0.25317	0.415128	0.492607	0.76067	0.50121	ENCFF172GJQ	CHIP:H3K27me3:C57BL/6 liver male adult (8 weeks)
754	2.1896	2.10647	0.0831306	0.815633	0.811258	0.0043751	0.253429	0.415139	0.537659	0.780365	0.501209	ENCFF352EVI	CHIP:H3K27me3:C57BL/6 hindbrain embryo (11.5 days)
905	1.13433	1.13388	0.000450492	0.676197	0.677089	-0.000892282	0.254594	0.416631	0.207935	0.514394	0.501202	ENCFF824UJK	CHIP:H3K9me3:C57BL/6 stomach embryo (16.5 days)
702	1.06862	1.06427	0.00434995	0.651641	0.651851	-0.000210404	0.255178	0.416695	0.222686	0.536125	0.501199	ENCFF402XZO	CHIP:H3K9me3:C57BL/6 midbrain embryo (11.5 days)
1018	2.62086	2.62041	0.00045228	0.732325	0.726003	0.00632262	0.255709	0.416695	0.883217	0.949981	0.501196	ENCFF916AGC	CHIP:H3K4me3:C57BL/6 lung embryo (14.5 days)
229	1.33616	1.32524	0.0109203	0.712571	0.706846	0.00572431	0.255793	0.416695	0.688782	0.865852	0.501195	ENCFF993SYN	CHIP:H3K4me1:129 ES-E14
574	2.08233	1.96843	0.113897	0.647213	0.636849	0.0103639	0.255879	0.416695	0.694525	0.869082	0.501195	ENCFF069MRV	CHIP:H3K4me2:C57BL/6 limb embryo (15.5 days)
67	0.206308	0.201748	0.00455989	0.157706	0.154116	0.00358929	0.255901	0.416695	0.53891	0.781002	0.501195	ENCFF076VZF	DNASE:C57BL/6 liver embryo (11.50 days)
628	0.821146	0.827195	-0.00604862	0.429441	0.4297	-0.000259459	0.256782	0.417563	0.593698	0.819104	0.50119	ENCFF353ZBQ	CHIP:GATA4:C57BL/6xSv129 liver adult
90	0.282904	0.279287	0.00361666	0.210315	0.207087	0.00322776	0.257279	0.417563	0.540153	0.781225	0.501187	ENCFF974HWL	DNASE:C57BL/6 R1
612	1.45919	1.41006	0.04913	0.66811	0.658956	0.0091536	0.257459	0.417563	0.415659	0.71436	0.501186	ENCFF450IIR	CHIP:H3K4me1:C57BL/6 midbrain embryo (12.5 days)
473	0.971404	0.935841	0.0355628	0.555926	0.551521	0.00440419	0.258	0.417563	0.877972	0.948294	0.501183	ENCFF689AFL	CHIP:ZMIZ1:DBA/2 MEL cell line
1278	2.01361	1.98141	0.0322036	0.555214	0.550083	0.00513077	0.258056	0.417563	0.655972	0.84812	0.501182	GSM874963	CHIP:H3K4me3:H3K4me3_ZT26 / H3K4me3 IP / .
930	2.28374	2.19966	0.0840802	0.818898	0.807396	0.0115026	0.258126	0.417563	0.19584	0.50206	0.501182	ENCFF961KLD	CHIP:H3K27ac:C57BL/6 midbrain postnatal (0 days)
791	2.95104	2.91559	0.0354483	1.10715	1.10127	0.00587714	0.258456	0.417563	0.551568	0.789396	0.50118	ENCFF044FTG	CHIP:H3K27me3:C57BL/6 heart embryo (15.5 days)
1073	1.66057	1.58735	0.0732194	0.670058	0.662022	0.0080362	0.258616	0.417563	0.589306	0.815245	0.501179	ENCFF583JQM	CHIP:H3K9ac:C57BL/6 liver embryo (11.5 days)
867	0.736067	0.738902	-0.00283515	0.510741	0.512674	-0.00193292	0.258721	0.417563	0.351731	0.653099	0.501179	ENCFF591NXE	CHIP:H3K9me3:C57BL/6 stomach postnatal (0 days)
305	0.574388	0.580621	-0.00623286	0.34965	0.347913	0.00173762	0.259023	0.41764	0.775637	0.906472	0.501177	ENCFF339GSH	CHIP:CTCF:C57BL/6 ES-Bruce4
376	2.33655	2.29	0.0465522	1.00498	1.00186	0.0031265	0.260111	0.418983	0.8094	0.920307	0.501171	ENCFF974RAM	CHIP:H3K36me3:C57BL/6 testis male adult (8 weeks)
900	2.90052	2.83539	0.0651367	1.06562	1.05933	0.00628865	0.261494	0.420798	0.660303	0.850218	0.501163	ENCFF089CJB	CHIP:H3K27me3:C57BL/6 kidney embryo (16.5 days)
972	1.94586	1.89088	0.054988	0.79731	0.789425	0.00788432	0.262339	0.421745	0.529565	0.777753	0.501158	ENCFF870LES	CHIP:H3K4me1:C57BL/6 limb embryo (12.5 days)
752	2.96165	2.86381	0.0978451	0.77795	0.772567	0.00538272	0.263748	0.423473	0.501457	0.765739	0.501151	ENCFF099OBO	CHIP:H3K4me2:C57BL/6 heart postnatal (0 days)
40	0.402575	0.383352	0.0192232	0.226965	0.224414	0.00255127	0.26393	0.423473	0.499904	0.765484	0.50115	ENCFF242YCJ	DNASE:C57BL/6 induced T-regulatory cell male adult (8 weeks)
1225	1.73175	1.76243	-0.0306795	0.882249	0.88045	0.00179887	0.264188	0.423473	0.44225	0.735442	0.501148	GSM2390587	CHIP:.:ChIP-seq Rpc4 , ZT14, rep1, Maf1 KO / Liver / .
343	3.48576	3.32618	0.159577	1.11446	1.11112	0.00333667	0.265204	0.424689	0.840031	0.933179	0.501142	ENCFF865YFU	CHIP:H3K36me3:C57BL/6 heart male adult (8 weeks)
828	0.81804	0.819611	-0.00157046	0.421661	0.419289	0.00237152	0.265728	0.424774	0.606259	0.827311	0.50114	ENCFF278NWO	CHIP:CTCF:C57BL/6 heart postnatal (0 days)
1118	0.463495	0.460223	0.00327137	0.372778	0.368737	0.00404054	0.265775	0.424774	0.229893	0.544257	0.501139	GSM1176712	CHIP:SREBP1:SREBP1 (ZT14) / SREBP1_ZT14, liver cells / .
173	0.266124	0.261053	0.00507084	0.181418	0.179346	0.00207227	0.266061	0.424819	0.737178	0.885069	0.501138	UW18.2	ATAC:Loop_of_henle-clusters_18-cluster_2
1160	3.54293	3.45428	0.0886497	1.05549	1.04821	0.00728619	0.267091	0.42605	0.792349	0.913564	0.501132	GSM1479714	CHIP:PolII:PolII ZT 22 WT / Liver, WT, ZT 22, PolII ChIP / .
469	0.820136	0.827891	-0.00775439	0.537558	0.536892	0.000666142	0.269453	0.4294	0.525315	0.776162	0.501119	ENCFF643WMY	CHIP:ZNF384:129 ES-E14
1221	1.20931	1.25598	-0.0466645	0.696475	0.698456	-0.0019815	0.269875	0.429447	0.382041	0.679898	0.501117	GSM2390565	CHIP:.:ChIP-seq Rpc4 , ZT22, rep1, Arntl KO / Liver / .
260	0.613161	0.626627	-0.0134651	0.359906	0.359106	0.000800014	0.270005	0.429447	0.928704	0.971267	0.501116	ENCFF583QSM	CHIP:CTCF:C3H C2C12
607	2.77842	2.71519	0.0632348	0.999648	0.993827	0.00582165	0.270476	0.429779	0.306659	0.620284	0.501113	ENCFF164GUC	CHIP:H3K27me3:C57BL/6 lung embryo (14.5 days)
222	0.237898	0.23149	0.00640818	0.17241	0.169662	0.00274777	0.271477	0.430666	0.895345	0.955229	0.501108	UW7.2	ATAC:Unknown-clusters_7-cluster_2
1185	1.27105	1.26622	0.00483334	0.612805	0.609742	0.00306273	0.271592	0.430666	0.776266	0.906472	0.501107	GSM1659681	CHIP:.:Rev-erbalpha_eWAT_ZT10_rep1 / eWAT / .
1174	6.1708	6.15614	0.0146537	1.2341	1.22659	0.00751233	0.27182	0.430666	0.498737	0.765484	0.501106	GSM1479728	CHIP:H3K27ac:H3K27ac ZT 22 WT / Liver, WT, ZT 22, H3K27ac ChIP / .
321	2.62183	2.53271	0.0891194	0.986538	0.97884	0.0076983	0.27268	0.431612	0.714145	0.878906	0.501101	ENCFF619CVT	CHIP:H3K27ac:C57BL/6 cortical plate male adult (8 weeks)
125	1.04226	1.01747	0.0247936	0.602784	0.599412	0.00337172	0.272972	0.431658	0.856256	0.944814	0.5011	ENCFF917SGA	ATAC:C57BL/6 forebrain embryo (12.5 days)
831	1.24983	1.24884	0.000980735	0.708412	0.709651	-0.00123829	0.273247	0.431678	0.129827	0.407071	0.501098	ENCFF209XEZ	CHIP:H3K9me3:C57BL/6 kidney embryo (15.5 days)
862	1.14876	1.12528	0.0234803	0.601818	0.5988	0.00301749	0.273652	0.431861	0.566321	0.799369	0.501096	ENCFF179UEK	CHIP:H3K4me1:C57BL/6 stomach embryo (15.5 days)
217	0.188475	0.185292	0.0031824	0.158694	0.155772	0.00292261	0.273889	0.431861	0.291579	0.611051	0.501095	UW5.4	ATAC:Ex_neurons_CThPN-clusters_5-cluster_4
319	6.40977	6.37515	0.0346146	1.47025	1.46382	0.00642776	0.274473	0.432367	0.417513	0.716796	0.501091	ENCFF147BMC	CHIP:H3K4me3:C57BL/6 testis male adult (8 weeks)
965	3.16677	3.09543	0.0713406	1.11758	1.11178	0.00579989	0.274841	0.432532	0.775156	0.906472	0.501089	ENCFF201DBX	CHIP:H3K27me3:C57BL/6 kidney embryo (15.5 days)
735	1.12356	1.1314	-0.0078454	0.542593	0.536684	0.0059092	0.276982	0.435103	0.743161	0.886077	0.501078	ENCFF323AGE	CHIP:H3K9ac:C57BL/6 midbrain embryo (15.5 days)
692	2.70494	2.68355	0.0213876	0.714349	0.706846	0.00750357	0.277071	0.435103	0.488113	0.76067	0.501077	ENCFF389JEL	CHIP:H3K4me3:C57BL/6 lung embryo (16.5 days)
1064	1.00338	1.00439	-0.0010103	0.624731	0.62709	-0.00235969	0.277434	0.435103	0.109637	0.376849	0.501075	ENCFF197JHX	CHIP:H3K9me3:C57BL/6 neural tube embryo (12.5 days)
535	2.32261	2.279	0.0436118	0.965933	0.962648	0.00328475	0.277652	0.435103	0.788675	0.911888	0.501074	ENCFF574LGA	CHIP:H3K27me3:C57BL/6 hindbrain embryo (16.5 days)
760	2.65896	2.61221	0.0467532	1.05458	1.04833	0.00624657	0.277798	0.435103	0.548096	0.787169	0.501073	ENCFF133XFD	CHIP:H3K27me3:C57BL/6 intestine postnatal (0 days)
119	1.01598	0.983121	0.0328638	0.590335	0.58716	0.00317448	0.279135	0.436779	0.454412	0.740674	0.501066	ENCFF889QAK	ATAC:C57BL/6 midbrain embryo (11.5 days)
1007	1.7046	1.66082	0.0437838	0.741723	0.736176	0.00554693	0.280085	0.437849	0.762609	0.898646	0.501061	ENCFF623CRW	CHIP:H3K4me1:C57BL/6 limb embryo (15.5 days)
765	2.6447	2.58081	0.0638871	1.00373	0.996987	0.00673956	0.280772	0.438505	0.523543	0.77585	0.501057	ENCFF324UGW	CHIP:H3K27me3:C57BL/6 kidney embryo (14.5 days)
164	0.0775722	0.0750708	0.00250136	0.0676245	0.0669791	0.000645347	0.281381	0.43904	0.698792	0.871104	0.501054	UW16.1	ATAC:B_cells-clusters_16-cluster_1
1000	3.17699	3.15045	0.0265372	1.14116	1.136	0.00516069	0.283258	0.440936	0.38098	0.679437	0.501044	ENCFF845OXU	CHIP:H3K27me3:C57BL/6 heart postnatal (0 days)
655	1.98249	1.86211	0.12038	0.831942	0.824335	0.00760663	0.283377	0.440936	0.649554	0.846326	0.501043	ENCFF165DVJ	CHIP:H3K36me3:C57BL/6 lung postnatal (0 days)
723	1.6752	1.63736	0.0378414	0.731583	0.728416	0.00316679	0.283612	0.440936	0.329292	0.634533	0.501042	ENCFF866OFV	CHIP:H3K4me1:C57BL/6 stomach embryo (14.5 days)
471	0.781756	0.762335	0.0194214	0.49643	0.494704	0.00172651	0.28367	0.440936	0.778191	0.907129	0.501042	ENCFF122FYP	CHIP:HCFC1:129 ES-E14
39	0.356422	0.336204	0.0202184	0.203661	0.199891	0.00377004	0.285397	0.44304	0.722162	0.88057	0.501032	ENCFF540HLI	DNASE:C57BL/6 thymus male adult (8 weeks)
630	1.67808	1.64328	0.0347961	0.736982	0.733113	0.00386947	0.286217	0.44304	0.859171	0.945964	0.501028	ENCFF553YRO	CHIP:H3K4me1:C57BL/6 kidney embryo (14.5 days)
1068	1.22789	1.22516	0.00273228	0.701363	0.702068	-0.000704348	0.286399	0.44304	0.310041	0.620284	0.501027	ENCFF951TKF	CHIP:H3K9me3:C57BL/6 limb embryo (12.5 days)
212	0.31518	0.304881	0.010299	0.196562	0.194923	0.00163867	0.286426	0.44304	0.685841	0.863033	0.501027	UW4.3	ATAC:B_cells-clusters_4-cluster_3
514	1.4168	1.36894	0.0478529	0.668502	0.659716	0.00878537	0.286459	0.44304	0.115268	0.38729	0.501027	ENCFF774BPM	CHIP:H3K4me1:C57BL/6 hindbrain embryo (12.5 days)
304	1.57885	1.54021	0.0386362	0.70573	0.703488	0.00224215	0.286786	0.44304	0.528927	0.777753	0.501025	ENCFF852EDW	CHIP:EP300:C57BL/6 heart male adult (8 weeks)
162	0.192152	0.19073	0.00142203	0.153242	0.150738	0.00250441	0.286911	0.44304	0.675618	0.857837	0.501024	UW15.2	ATAC:Inhibitory_neurons-clusters_15-cluster_2
727	2.55707	2.47047	0.0865943	0.734014	0.729719	0.00429505	0.289539	0.446546	0.746091	0.887531	0.50101	ENCFF382IWW	CHIP:H3K4me2:C57BL/6 lung postnatal (0 days)
160	0.179683	0.17853	0.00115277	0.155786	0.154656	0.00112997	0.289725	0.446546	0.822922	0.928154	0.501009	UW14.3	ATAC:Sperm-clusters_14-cluster_3
224	0.128075	0.126944	0.00113097	0.110068	0.108769	0.0012986	0.291233	0.44845	0.42612	0.72456	0.501001	UW8.2	ATAC:Cerebellar_granule_cells-clusters_8-cluster_2
974	1.23382	1.23687	-0.00304484	0.710872	0.713772	-0.00290024	0.292552	0.45006	0.0708687	0.291219	0.500994	ENCFF878NXY	CHIP:H3K9me3:C57BL/6 midbrain embryo (13.5 days)
302	1.17663	1.13656	0.0400707	0.567719	0.559236	0.00848234	0.293581	0.451014	0.362338	0.665163	0.500989	ENCFF378CWR	CHIP:POLR2A:C57BL/6 embryonic fibroblast male embryo (13.5 weeks)
1114	0.223142	0.220603	0.00253953	0.19517	0.193934	0.00123636	0.293722	0.451014	0.744142	0.886603	0.500988	GSM1094256	CHIP:ATF4:ATF4_ChIP-seq / ATF4_ChIP-seq / Primary dermal fibroblasts
1101	1.01489	1.01481	7.14064e-05	0.627608	0.629206	-0.00159824	0.295173	0.452818	0.171882	0.47067	0.50098	ENCFF968CFU	CHIP:H3K9me3:C57BL/6 stomach embryo (14.5 days)
254	1.29499	1.26898	0.0260087	0.548006	0.54675	0.00125629	0.296266	0.454054	0.603151	0.824441	0.500975	ENCFF059BXG	CHIP:MYOG:C3H myocyte originated from C2C12
846	0.800512	0.798209	0.00230229	0.546043	0.546324	-0.000280917	0.296531	0.454054	0.110596	0.377775	0.500973	ENCFF505IIX	CHIP:H3K9me3:C57BL/6 embryonic facial prominence embryo (11.5 days)
24	0.23445	0.217076	0.0173748	0.139218	0.136181	0.00303657	0.297161	0.454595	0.786673	0.910214	0.50097	ENCFF435WED	DNASE:129 liver male embryo (14.5 days)
962	1.77796	1.7636	0.0143563	0.844545	0.84408	0.000465572	0.298281	0.455884	0.532959	0.779049	0.500964	ENCFF075BNF	CHIP:H3K9me3:C57BL/6 forebrain embryo (10.5 days)
516	3.10798	3.04572	0.0622561	1.08928	1.08357	0.00570905	0.299217	0.456885	0.672319	0.855631	0.500959	ENCFF396TSB	CHIP:H3K27me3:C57BL/6 intestine embryo (14.5 days)
1021	0.997428	0.988656	0.00877243	0.621122	0.619774	0.00134742	0.299492	0.456885	0.644685	0.846135	0.500958	ENCFF477UFW	CHIP:H3K9me3:C57BL/6 liver embryo (11.5 days)
372	2.58796	2.44558	0.142385	0.955683	0.950758	0.00492531	0.302597	0.460935	0.712344	0.878665	0.500941	ENCFF175AIB	CHIP:H3K36me3:C57BL/6 kidney male adult (8 weeks)
1230	0.40337	0.397133	0.00623631	0.315523	0.313934	0.00158933	0.303065	0.460935	0.615554	0.834159	0.500939	GSM3212801	CHIP:Rev-erba:Reverba_ZT8 control REP1 / gastrocnemius / .
172	0.224676	0.220912	0.00376457	0.159516	0.158222	0.00129397	0.303256	0.460935	0.435185	0.733213	0.500938	UW18.1	ATAC:DCT_CD-clusters_18-cluster_1
279	2.28283	2.29042	-0.00759339	0.752521	0.747645	0.0048759	0.303269	0.460935	0.655799	0.84812	0.500938	ENCFF288SAJ	CHIP:H3K4me3:C57BL/6 cerebellum male adult (8 weeks)
118	0.0262277	0.0255346	0.000693036	0.0239002	0.0235029	0.000397297	0.304021	0.461652	0.553269	0.791141	0.500934	ENCFF683WEV	ATAC:C57BL/6 hematopoietic stem cell adult (5-6 weeks)
318	2.69267	2.65802	0.0346491	1.04597	1.0399	0.00607157	0.304665	0.462202	0.647291	0.846135	0.500931	ENCFF073HRX	CHIP:H3K4me1:C57BL/6 testis male adult (8 weeks)
826	1.78884	1.74231	0.0465271	0.750003	0.746861	0.00314146	0.305593	0.463182	0.539969	0.781225	0.500926	ENCFF577SJR	CHIP:H3K4me1:C57BL/6 heart postnatal (0 days)
115	1.1433	1.09993	0.0433657	0.607677	0.601885	0.00579166	0.308297	0.46685	0.561346	0.794395	0.500912	ENCFF092DWB	ATAC:C57BL/6 forebrain postnatal (0 days)
128	1.23303	1.21014	0.0228852	0.671705	0.668236	0.00346875	0.310233	0.469071	0.750357	0.890135	0.500902	ENCFF956ZAH	ATAC:C57BL/6 hindbrain embryo (16.5 days)
396	0.281243	0.282082	-0.000839382	0.239872	0.240061	-0.000188842	0.310545	0.469071	0.86827	0.947256	0.5009	ENCFF460EAQ	CHIP:FLI1:CD-1 megakaryocyte embryo (14.5 days)
1089	1.48941	1.4593	0.0301113	0.658516	0.650224	0.00829256	0.31082	0.469071	0.559686	0.793701	0.500899	ENCFF566GYY	CHIP:H3K9ac:C57BL/6 heart embryo (12.5 days)
774	2.26026	2.14734	0.112924	0.681635	0.67395	0.00768465	0.310906	0.469071	0.701005	0.872341	0.500898	ENCFF290CLV	CHIP:H3K4me2:C57BL/6 stomach embryo (15.5 days)
1071	1.28731	1.26361	0.0237033	0.604055	0.59919	0.00486511	0.311879	0.470107	0.61374	0.832781	0.500893	ENCFF224IHW	CHIP:H3K9ac:C57BL/6 intestine postnatal (0 days)
763	0.992995	1.00465	-0.0116552	0.458409	0.456599	0.0018101	0.313904	0.472665	0.686014	0.863033	0.500883	ENCFF691ULU	CHIP:CTCF:C57BL/6 liver embryo (14.5 days)
416	3.4003	3.41251	-0.0122128	1.22155	1.21768	0.0038718	0.31435	0.472665	0.838449	0.932627	0.500881	ENCFF923MXW	CHIP:H3K27me3:B10.H-2aH-4bp/Wts CH12.LX
697	2.56758	2.49245	0.0751309	0.958467	0.95444	0.00402778	0.314439	0.472665	0.800014	0.916613	0.50088	ENCFF349EPV	CHIP:H3K27me3:C57BL/6 hindbrain embryo (12.5 days)
918	3.8524	3.71142	0.140975	0.86454	0.858972	0.00556779	0.314815	0.472797	0.890964	0.953723	0.500878	ENCFF019ABU	CHIP:H3K4me2:C57BL/6 heart embryo (13.5 days)
681	1.62827	1.59746	0.0308111	0.786724	0.782066	0.00465822	0.316088	0.474276	0.707513	0.876655	0.500872	ENCFF886OPQ	CHIP:H3K27me3:C57BL/6 stomach embryo (15.5 days)
1095	1.76318	1.7329	0.0302792	0.76131	0.758499	0.0028106	0.317632	0.476158	0.702969	0.872341	0.500864	ENCFF230BUR	CHIP:H3K4me1:C57BL/6 embryonic facial prominence embryo (14.5 days)
312	1.7828	1.72072	0.0620741	0.56788	0.562422	0.00545794	0.318153	0.476504	0.811988	0.921973	0.500861	ENCFF810PIW	CHIP:H3K4me3:C57BL/6 thymus male adult (8 weeks)
809	1.04014	1.03464	0.00550461	0.640808	0.640869	-6.181e-05	0.319216	0.477559	0.556215	0.793283	0.500856	ENCFF207EPW	CHIP:H3K9me3:C57BL/6 heart embryo (11.5 days)
78	0.180745	0.17527	0.00547446	0.13814	0.134822	0.00331812	0.319439	0.477559	0.757289	0.894483	0.500855	ENCFF071TLE	DNASE:C57BL/6 heart embryo (10.50 days)
916	1.41133	1.3727	0.0386335	0.677896	0.671098	0.00679785	0.320608	0.478872	0.668233	0.85408	0.500849	ENCFF140IVD	CHIP:H3K4me1:C57BL/6 embryonic facial prominence embryo (12.5 days)
1026	1.73218	1.6963	0.0358728	0.738887	0.735799	0.003088	0.321297	0.479244	0.59476	0.819104	0.500845	ENCFF283EBS	CHIP:H3K4me1:C57BL/6 lung embryo (15.5 days)
296	0.564585	0.569572	-0.00498676	0.373132	0.371367	0.00176489	0.32144	0.479244	0.718254	0.879058	0.500844	ENCFF867MOQ	CHIP:CTCF:C57BL/6 cerebellum male adult (8 weeks)
16	0.373574	0.370062	0.00351173	0.256332	0.25456	0.00177154	0.323164	0.481377	0.516002	0.770304	0.500836	ENCFF090NJT	DNASE:C57BL/6 gonadal fat pad male adult (8 weeks)
181	0.219929	0.208374	0.0115553	0.148596	0.145183	0.00341322	0.324262	0.482137	0.29231	0.611154	0.50083	UW2.1	ATAC:T_cells-clusters_2-cluster_1
244	2.27873	2.25029	0.0284457	0.679148	0.674611	0.00453705	0.324455	0.482137	0.82528	0.92936	0.500829	ENCFF436ZSV	CHIP:H3K4me3:C3H C2C12
186	0.247665	0.24389	0.00377429	0.16078	0.160507	0.000272512	0.324555	0.482137	0.782002	0.907831	0.500829	UW22.2	ATAC:Endothelial_I_(glomerular)-clusters_22-cluster_2
335	2.15651	1.96991	0.186603	0.687141	0.683422	0.00371867	0.326061	0.483938	0.853314	0.943532	0.500821	ENCFF506KCT	CHIP:H3K27ac:C57BL/6 liver embryo (14.5 days)
1041	2.0177	1.94409	0.0736083	0.794738	0.7894	0.00533825	0.328639	0.487323	0.457592	0.742644	0.500808	ENCFF917SXQ	CHIP:H3K4me1:C57BL/6 heart embryo (11.5 days)
1172	6.61342	6.61873	-0.00530434	1.28069	1.274	0.00669491	0.330098	0.489045	0.690106	0.866722	0.500801	GSM1479726	CHIP:H3K27ac:H3K27ac ZT 14 WT / Liver, WT, ZT 14, H3K27ac ChIP / .
231	0.500658	0.488745	0.0119127	0.36589	0.363035	0.00285473	0.331244	0.490058	0.529705	0.777753	0.500795	ENCFF325GQU	CHIP:H3K9me3:129 ES-E14
936	2.55259	2.53674	0.0158494	0.707133	0.701246	0.00588679	0.331467	0.490058	0.891612	0.953723	0.500794	ENCFF309WXH	CHIP:H3K4me3:C57BL/6 stomach embryo (16.5 days)
648	2.08921	2.01374	0.0754626	0.782069	0.777346	0.00472254	0.331677	0.490058	0.976046	0.991463	0.500793	ENCFF217EPP	CHIP:H3K27me3:C57BL/6 neural tube embryo (11.5 days)
790	1.96978	1.92441	0.0453666	0.799894	0.795224	0.00466907	0.333323	0.49163	0.767698	0.900948	0.500784	ENCFF436MUY	CHIP:H3K4me1:C57BL/6 kidney embryo (15.5 days)
596	2.82079	2.73615	0.0846381	1.0198	1.01681	0.00298727	0.333576	0.49163	0.691735	0.866911	0.500783	ENCFF610HBD	CHIP:H3K27me3:C57BL/6 midbrain embryo (13.5 days)
820	2.81221	2.64056	0.171651	0.992013	0.984737	0.00727594	0.333638	0.49163	0.805682	0.918622	0.500783	ENCFF085HHF	CHIP:H3K36me3:C57BL/6 intestine postnatal (0 days)
407	6.72173	6.44063	0.281097	1.42344	1.41754	0.00590229	0.334353	0.492242	0.924079	0.967046	0.500779	ENCFF220KWG	CHIP:H3K27me3:CD-1 erythroblast embryo (14.5 days)
908	1.12106	1.12055	0.000507116	0.669071	0.670832	-0.00176066	0.335694	0.49345	0.421653	0.72028	0.500773	ENCFF137LNV	CHIP:H3K9me3:C57BL/6 forebrain embryo (12.5 days)
937	2.30035	2.32301	-0.0226636	0.696332	0.692219	0.00411314	0.335774	0.49345	0.955421	0.984459	0.500772	ENCFF331OQE	CHIP:H3K4me3:C57BL/6 heart embryo (12.5 days)
420	0.586181	0.585915	0.000266492	0.445042	0.443464	0.00157875	0.336281	0.493648	0.543562	0.783295	0.50077	ENCFF367IMF	CHIP:GATA2:129 G1E-ER4 treated with 10 nM 17B-estradiol for 24 hours
163	0.208375	0.204911	0.00346373	0.16909	0.165988	0.00310133	0.33651	0.493648	0.39515	0.6966	0.500768	UW15.3	ATAC:SOM+_Interneurons-clusters_15-cluster_3
821	2.41896	2.32713	0.0918252	0.707419	0.698696	0.0087232	0.337073	0.494033	0.734251	0.885069	0.500766	ENCFF766FZH	CHIP:H3K4me2:C57BL/6 intestine embryo (14.5 days)
1156	2.13033	2.08931	0.0410223	0.834663	0.829626	0.00503677	0.337801	0.494659	0.895103	0.955229	0.500762	GSM1479710	CHIP:PolII:PolII ZT 6 WT / Liver, WT, ZT 6, PolII ChIP / .
32	0.23734	0.235276	0.00206436	0.164051	0.1627	0.0013511	0.339502	0.496706	0.876423	0.948294	0.500754	ENCFF632WLC	DNASE:M.spretus x C57BL/6J Patski
1080	0.78937	0.784888	0.00448203	0.539768	0.539742	2.63453e-05	0.340933	0.497997	0.25086	0.5685	0.500746	ENCFF937IQZ	CHIP:H3K9me3:C57BL/6 limb embryo (11.5 days)
185	0.186089	0.184441	0.00164859	0.128643	0.128474	0.000168741	0.341333	0.497997	0.954026	0.984459	0.500744	UW22.1	ATAC:Endothelial_I_cells-clusters_22-cluster_1
876	4.42981	4.29372	0.136089	1.26435	1.25917	0.00518119	0.341595	0.497997	0.806807	0.919267	0.500743	ENCFF520CMB	CHIP:H3K27me3:C57BL/6 liver embryo (15.5 days)
985	1.81782	1.80505	0.0127677	0.854851	0.854879	-2.83718e-05	0.341596	0.497997	0.641418	0.845786	0.500743	ENCFF190AYI	CHIP:H3K9me3:C57BL/6 midbrain embryo (10.5 days)
373	2.5393	2.51992	0.0193832	1.03824	1.0367	0.00154448	0.342813	0.4992	0.67363	0.856636	0.500737	ENCFF906CRU	CHIP:H3K27me3:C57BL/6 small intestine male adult (8 weeks)
422	0.513534	0.504035	0.00949931	0.389533	0.386754	0.00277904	0.343211	0.4992	0.822639	0.928154	0.500735	ENCFF754BDS	CHIP:POLR2AphosphoS5:129 G1E-ER4 treated with 10 nM 17B-estradiol for 24 hours
188	0.300692	0.297626	0.00306597	0.18278	0.182846	-6.54608e-05	0.343399	0.4992	0.972061	0.991463	0.500734	UW22.4	ATAC:Endothelial_I_cells-clusters_22-cluster_4
91	0.279468	0.273271	0.00619748	0.179752	0.177453	0.00229919	0.343636	0.4992	0.970253	0.991463	0.500733	ENCFF197TQR	DNASE:C57BL/6 stomach postnatal (0 days)
1070	2.31789	2.27105	0.046839	0.951864	0.946068	0.00579572	0.343988	0.499268	0.666015	0.852943	0.500731	ENCFF039QOO	CHIP:H3K27me3:C57BL/6 stomach embryo (16.5 days)
38	0.359486	0.33856	0.020926	0.193664	0.191152	0.00251232	0.344347	0.499349	0.445412	0.736122	0.50073	ENCFF896PZK	DNASE:C57BL/6 CD4-positive helper T cell male adult (8 weeks)
1092	1.02164	1.02245	-0.000809312	0.628784	0.631039	-0.00225514	0.345193	0.500134	0.229017	0.543623	0.500725	ENCFF063VTT	CHIP:H3K9me3:C57BL/6 hindbrain embryo (12.5 days)
102	0.925518	0.903646	0.0218714	0.553781	0.551434	0.00234741	0.347072	0.502413	0.647863	0.846135	0.500716	ENCFF446XWP	ATAC:C57BL/6 kidney embryo (15.5 days)
1013	1.66182	1.62221	0.0396073	0.72506	0.721768	0.00329185	0.34772	0.502908	0.811363	0.921901	0.500713	ENCFF702GVB	CHIP:H3K4me1:C57BL/6 intestine embryo (16.5 days)
687	2.32798	2.24212	0.0858681	0.707838	0.702855	0.00498301	0.348476	0.503559	0.969827	0.991463	0.500709	ENCFF761AXJ	CHIP:H3K4me2:C57BL/6 stomach postnatal (0 days)
174	0.166466	0.162937	0.00352852	0.128657	0.127466	0.00119062	0.350885	0.506593	0.93841	0.97521	0.500697	UW18.3	ATAC:Loop_of_henle-clusters_18-cluster_3
183	0.289305	0.276719	0.0125863	0.192078	0.188296	0.0037819	0.351338	0.506734	0.507656	0.76908	0.500695	UW21.1	ATAC:Oligodendrocytes-clusters_21-cluster_1
755	1.78929	1.73915	0.050142	0.783883	0.779771	0.00411135	0.351599	0.506734	0.97418	0.991463	0.500694	ENCFF901MQW	CHIP:H3K27me3:C57BL/6 neural tube embryo (12.5 days)
1062	2.23502	2.17168	0.0633378	0.901769	0.899399	0.0023706	0.352557	0.50767	0.637238	0.845394	0.500689	ENCFF908XOQ	CHIP:H3K27me3:C57BL/6 midbrain embryo (14.5 days)
1038	2.11046	2.06312	0.0473394	0.827171	0.823132	0.00403959	0.355261	0.511115	0.75652	0.894217	0.500676	ENCFF665XFW	CHIP:H3K4me1:C57BL/6 kidney embryo (16.5 days)
1090	1.26014	1.24277	0.0173727	0.681232	0.677667	0.00356495	0.356602	0.512596	0.876454	0.948294	0.500669	ENCFF587CHP	CHIP:H3K27me3:C57BL/6 stomach postnatal (0 days)
152	0.27708	0.261606	0.0154741	0.173374	0.171003	0.00237092	0.3605	0.517746	0.617704	0.834159	0.50065	UW12.1	ATAC:T_cells-clusters_12-cluster_1
214	0.231623	0.227038	0.00458467	0.184788	0.181262	0.00352527	0.361222	0.51833	0.351791	0.653099	0.500647	UW5.1	ATAC:Ex_neurons_CPN-clusters_5-cluster_1
1243	1.35884	1.39462	-0.035777	0.594831	0.593706	0.00112462	0.362419	0.519594	0.823218	0.928154	0.500641	GSM840529	CHIP:REV-ERB:REV-ERB beta / liver_REV-ERB beta_ChIP / .
31	0.336099	0.32956	0.00653881	0.193249	0.19177	0.0014786	0.363732	0.521022	0.833981	0.931989	0.500635	ENCFF950ALJ	DNASE:NIH/Swiss NIH3T3
1217	1.6055	1.65964	-0.0541329	0.819964	0.823146	-0.00318217	0.364671	0.521661	0.350696	0.653099	0.50063	GSM2390561	CHIP:.:ChIP-seq Rpc4 , ZT06, rep1, Arntl KO / Liver / .
756	3.13773	3.00713	0.130597	0.781316	0.774413	0.00690317	0.364813	0.521661	0.87328	0.948294	0.500629	ENCFF062SWO	CHIP:H3K4me2:C57BL/6 heart embryo (15.5 days)
268	0.564053	0.567023	-0.00296992	0.403729	0.404289	-0.000560552	0.365651	0.522404	0.942	0.977211	0.500625	ENCFF967HVW	CHIP:REST:C3H myocyte originated from C2C12
2	0.382301	0.367681	0.0146201	0.2088	0.206717	0.00208296	0.368276	0.525697	0.955565	0.984459	0.500613	ENCFF079SPZ	DNASE:C57BL/6 B cell male adult (8 weeks)
283	2.74725	2.77824	-0.0309916	0.936708	0.934112	0.0025956	0.368766	0.52594	0.989415	0.995755	0.50061	ENCFF881VZQ	CHIP:H3K4me1:C57BL/6 liver male adult (8 weeks)
218	0.190709	0.190333	0.000376925	0.158516	0.156758	0.00175737	0.369125	0.525995	0.684623	0.863033	0.500609	UW5.5	ATAC:Inhibitory_neurons-clusters_5-cluster_5
805	2.97632	2.85475	0.121564	0.762057	0.755263	0.00679356	0.370112	0.526944	0.639503	0.845394	0.500604	ENCFF362OAA	CHIP:H3K4me2:C57BL/6 liver embryo (16.5 days)
210	0.356744	0.342102	0.0146428	0.195956	0.193706	0.00224961	0.371264	0.528128	0.870918	0.94766	0.500598	UW4.1	ATAC:B_cells-clusters_4-cluster_1
1106	2.76662	2.63617	0.130452	0.71175	0.706113	0.00563687	0.37227	0.5291	0.836239	0.931989	0.500593	ENCFF068KSP	CHIP:H3K4me3:C57BL/6 liver embryo (13.5 days)
280	2.43128	2.40222	0.029062	0.987862	0.983034	0.0048272	0.373284	0.530082	0.225509	0.537753	0.500588	ENCFF827AKI	CHIP:H3K4me1:C57BL/6 cerebellum male adult (8 weeks)
769	1.2755	1.27624	-0.000740051	0.720354	0.721965	-0.00161058	0.37415	0.530854	0.579025	0.807422	0.500584	ENCFF433RSJ	CHIP:H3K9me3:C57BL/6 kidney embryo (14.5 days)
132	1.18984	1.16323	0.0266117	0.634733	0.631449	0.00328457	0.37599	0.533003	0.973683	0.991463	0.500575	ENCFF845NRJ	ATAC:C57BL/6 forebrain embryo (14.5 days)
259	1.03473	1.03744	-0.00271344	0.579127	0.577729	0.00139797	0.377645	0.534889	0.989329	0.995755	0.500568	ENCFF528UTW	CHIP:E2F4:C3H myocyte originated from C2C12
1171	7.00111	6.98655	0.0145507	1.34627	1.3406	0.00566566	0.378799	0.536061	0.487888	0.76067	0.500562	GSM1479725	CHIP:H3K27ac:H3K27ac ZT 10 WT / Liver, WT, ZT 10, H3K27ac ChIP / .
310	1.31438	1.22143	0.0929472	0.572622	0.569381	0.0032413	0.379655	0.53681	0.859693	0.945964	0.500558	ENCFF354DWX	CHIP:H3K27ac:C57BL/6 thymus male adult (8 weeks)
598	3.70095	3.58498	0.115966	1.14773	1.14177	0.00596035	0.380188	0.536876	0.804448	0.917853	0.500555	ENCFF943PON	CHIP:H3K27me3:C57BL/6 liver embryo (16.5 days)
1037	2.48838	2.46277	0.0256128	0.705332	0.69985	0.0054816	0.380413	0.536876	0.684495	0.863033	0.500554	ENCFF104GKL	CHIP:H3K4me3:C57BL/6 heart postnatal (0 days)
107	1.12578	1.11735	0.00842786	0.569851	0.56813	0.00172162	0.380788	0.536876	0.444249	0.736061	0.500552	ENCFF823RLW	ATAC:C57BL/6 lung postnatal (0 days)
1186	1.95314	1.94361	0.00952804	0.820765	0.819514	0.00125146	0.381009	0.536876	0.976377	0.991463	0.500551	GSM1659683	CHIP:.:input_eWAT / eWAT / .
134	1.30101	1.27066	0.0303462	0.671121	0.667936	0.00318503	0.381871	0.537494	0.989805	0.995755	0.500547	ENCFF960LTM	ATAC:C57BL/6 forebrain embryo (16.5 days)
915	4.99566	4.8424	0.153266	1.32803	1.32224	0.00578713	0.382101	0.537494	0.863926	0.947064	0.500546	ENCFF361SUJ	CHIP:H3K27me3:C57BL/6 liver embryo (12.5 days)
724	3.58403	3.47358	0.110452	1.12463	1.12015	0.00448167	0.38286	0.5381	0.881397	0.949597	0.500543	ENCFF035UHY	CHIP:H3K27me3:C57BL/6 liver embryo (14.5 days)
601	0.87415	0.874276	-0.000125587	0.569307	0.571037	-0.00172955	0.384415	0.539824	0.255449	0.575195	0.500535	ENCFF820QKT	CHIP:H3K9me3:C57BL/6 embryonic facial prominence embryo (15.5 days)
940	2.8973	2.78948	0.107817	0.796311	0.78924	0.0070706	0.385757	0.541246	0.732691	0.885069	0.500529	ENCFF690UIX	CHIP:H3K4me2:C57BL/6 liver embryo (11.5 days)
961	2.8106	2.73682	0.0737762	1.02359	1.02059	0.00299108	0.388676	0.544456	0.990907	0.995755	0.500515	ENCFF760VJL	CHIP:H3K27me3:C57BL/6 forebrain embryo (13.5 days)
150	0.231246	0.227044	0.00420205	0.165382	0.164043	0.00133936	0.388877	0.544456	0.955698	0.984459	0.500514	UW11.4	ATAC:Proximal_tubule_S3-clusters_11-cluster_4
864	4.52125	4.37891	0.142343	1.25786	1.25288	0.00498486	0.389039	0.544456	0.887515	0.952989	0.500513	ENCFF914LRA	CHIP:H3K27me3:C57BL/6 liver embryo (13.5 days)
538	2.70072	2.70949	-0.00876784	0.725303	0.721587	0.00371623	0.392242	0.548471	0.853946	0.943532	0.500498	ENCFF774GGS	CHIP:H3K4me3:C57BL/6 heart embryo (14.5 days)
847	1.11164	1.11247	-0.000822902	0.572964	0.5743	-0.00133556	0.393191	0.54933	0.862964	0.947064	0.500493	ENCFF583XLF	CHIP:EP300:C57BL/6 lung postnatal (0 days)
958	3.29284	3.15047	0.14237	0.796095	0.788622	0.00747293	0.393726	0.549611	0.802461	0.916859	0.500491	ENCFF581EFO	CHIP:H3K4me2:C57BL/6 liver embryo (13.5 days)
577	2.32692	2.2101	0.116815	0.699922	0.691087	0.00883561	0.395521	0.551648	0.7407	0.885069	0.500482	ENCFF854ASW	CHIP:H3K4me2:C57BL/6 intestine embryo (16.5 days)
1015	2.18046	2.1251	0.0553629	0.900107	0.897038	0.00306898	0.396006	0.551855	0.989961	0.995755	0.50048	ENCFF900BKA	CHIP:H3K27me3:C57BL/6 forebrain embryo (14.5 days)
1205	1.27667	1.32128	-0.0446078	0.739209	0.74108	-0.00187063	0.397136	0.552745	0.658813	0.848965	0.500475	GSM2390510	CHIP:.:ChIP-seq Rpc4 , ZT10, rep1, CONTROL / Liver / .
977	2.85457	2.8016	0.0529666	1.05036	1.0462	0.00416088	0.397589	0.552745	0.8093	0.920307	0.500473	ENCFF749LHU	CHIP:H3K27me3:C57BL/6 lung embryo (16.5 days)
613	1.85762	1.81403	0.0435826	0.773453	0.770427	0.00302601	0.397688	0.552745	0.491363	0.76067	0.500472	ENCFF173OSG	CHIP:H3K4me1:C57BL/6 intestine embryo (14.5 days)
883	3.26397	3.15495	0.109022	0.833929	0.827643	0.00628603	0.398034	0.552745	0.831062	0.931847	0.500471	ENCFF817VNI	CHIP:H3K4me2:C57BL/6 liver postnatal (0 days)
968	3.43915	3.29419	0.144962	0.82035	0.814506	0.00584424	0.398327	0.552745	0.916431	0.96519	0.500469	ENCFF652SDD	CHIP:H3K4me2:C57BL/6 heart embryo (16.5 days)
1192	1.1452	1.17982	-0.0346187	0.568442	0.570275	-0.00183344	0.399488	0.553889	0.795642	0.914167	0.500464	GSM1659692	CHIP:.:RORalpha_liver_ZT10 / liver / .
902	3.00535	2.8776	0.127751	0.873684	0.866164	0.00752032	0.400576	0.55493	0.438173	0.734191	0.500459	ENCFF588AKC	CHIP:H3K27ac:C57BL/6 liver postnatal (0 days)
872	1.80083	1.76956	0.0312699	0.836353	0.831322	0.00503051	0.402204	0.556716	0.866282	0.947174	0.500451	ENCFF460ZYC	CHIP:H3K27me3:C57BL/6 kidney postnatal (0 days)
761	1.1683	1.14599	0.022302	0.619597	0.614312	0.00528502	0.402918	0.557234	0.731013	0.885069	0.500448	ENCFF143LAV	CHIP:H3K4me1:C57BL/6 midbrain postnatal (0 days)
725	1.94337	1.87513	0.0682408	0.783179	0.778503	0.00467592	0.403311	0.557309	0.618385	0.834159	0.500446	ENCFF816ESX	CHIP:H3K4me1:C57BL/6 heart embryo (15.5 days)
182	0.197773	0.191584	0.00618899	0.141143	0.139427	0.00171639	0.404141	0.557986	0.504874	0.767806	0.500442	UW20.1	ATAC:Type_I_pneumocytes-clusters_20-cluster_1
1139	0.888469	0.919367	-0.0308981	0.475164	0.477824	-0.00265923	0.405592	0.559519	0.617077	0.834159	0.500435	GSM1437734	CHIP:RORalpha:RORalpha Liver ZT22 ChIP-seq / liver / .
388	2.08977	1.99514	0.0946325	0.747662	0.746058	0.0016039	0.406087	0.559733	0.898456	0.955736	0.500433	ENCFF250LUT	CHIP:H3K9ac:B10.H-2aH-4bp/Wts CH12.LX
25	0.371789	0.359874	0.0119144	0.228279	0.226143	0.00213614	0.410583	0.565455	0.905816	0.958927	0.500412	ENCFF102MGA	DNASE:C57BL/6 lung male adult (8 weeks)
700	1.98566	1.95741	0.028252	0.903837	0.902389	0.00144804	0.411275	0.565934	0.975226	0.991463	0.500408	ENCFF156SIF	CHIP:H3K27me3:C57BL/6 hindbrain postnatal (0 days)
527	3.20284	3.09381	0.109027	0.787358	0.78037	0.00698745	0.414323	0.569651	0.623851	0.837408	0.500394	ENCFF348ZCL	CHIP:H3K4me2:C57BL/6 kidney embryo (15.5 days)
314	2.64635	2.55419	0.0921657	0.802575	0.798775	0.00380057	0.415594	0.57092	0.6619	0.850379	0.500388	ENCFF212SMS	CHIP:H3K27ac:C57BL/6 small intestine male adult (8 weeks)
155	0.170778	0.163103	0.00767489	0.127131	0.125509	0.00162201	0.416573	0.571787	0.721766	0.88057	0.500384	UW12.4	ATAC:T_cells-clusters_12-cluster_4
9	0.28643	0.272635	0.0137954	0.173094	0.169638	0.00345576	0.417068	0.571989	0.701946	0.872341	0.500381	ENCFF649DYS	DNASE:CD-1 c-Kit-positive CD71-positive TER-119-positive erythroid progenitor cells male embryo (14.5 days)
873	1.88497	1.85226	0.0327017	0.868097	0.866264	0.00183302	0.417554	0.572178	0.988179	0.995755	0.500379	ENCFF848GOF	CHIP:H3K27me3:C57BL/6 forebrain embryo (15.5 days)
249	2.1203	2.07363	0.0466745	0.678149	0.672556	0.00559211	0.418556	0.572839	0.823645	0.928154	0.500374	ENCFF518CXM	CHIP:H3K4me3:C3H myocyte originated from C2C12
823	1.89824	1.83594	0.062307	0.767332	0.764078	0.00325459	0.418734	0.572839	0.987837	0.995755	0.500374	ENCFF544BIS	CHIP:H3K4me1:C57BL/6 liver embryo (16.5 days)
696	0.789257	0.78568	0.00357711	0.532146	0.532458	-0.00031215	0.419433	0.573318	0.784407	0.908872	0.50037	ENCFF570FAF	CHIP:H3K9me3:C57BL/6 hindbrain embryo (11.5 days)
151	0.169666	0.16747	0.00219567	0.129925	0.129096	0.000828877	0.420099	0.573376	0.894312	0.955229	0.500367	UW11.5	ATAC:Proximal_tubule-clusters_11-cluster_5
1206	1.42103	1.46862	-0.04759	0.787965	0.788995	-0.00103009	0.420173	0.573376	0.672261	0.855631	0.500367	GSM2390511	CHIP:.:ChIP-seq Rpc4 , ZT14, rep1, CONTROL / Liver / .
282	1.77908	1.74809	0.0309898	0.583421	0.579134	0.00428659	0.421406	0.574485	0.708823	0.87674	0.500361	ENCFF177YGH	CHIP:H3K4me3:C57BL/6 kidney male adult (8 weeks)
252	4.26311	4.23161	0.0314999	0.985372	0.985554	-0.000181913	0.421809	0.574485	0.501293	0.765739	0.500359	ENCFF921JTJ	CHIP:H3K79me3:C3H C2C12
297	1.21773	1.2072	0.0105315	0.637345	0.63413	0.00321442	0.422035	0.574485	0.756365	0.894217	0.500358	ENCFF625PME	CHIP:POLR2A:C57BL/6 cerebellum male adult (8 weeks)
869	1.28262	1.28655	-0.0039289	0.725678	0.727861	-0.00218254	0.422622	0.574808	0.49084	0.76067	0.500355	ENCFF797OAF	CHIP:H3K9me3:C57BL/6 heart embryo (12.5 days)
1024	1.86921	1.82977	0.0394393	0.858387	0.856559	0.00182849	0.42392	0.576097	0.976289	0.991463	0.500349	ENCFF376ZJO	CHIP:H3K27me3:C57BL/6 midbrain embryo (15.5 days)
993	1.41073	1.39991	0.0108169	0.737139	0.737014	0.000124693	0.425122	0.576922	0.783146	0.908051	0.500344	ENCFF442KVI	CHIP:H3K9me3:C57BL/6 embryonic facial prominence embryo (10.5 days)
199	0.214725	0.213365	0.00136028	0.166363	0.163787	0.00257668	0.42523	0.576922	0.516087	0.770304	0.500343	UW27.1	ATAC:Purkinje_cells-clusters_27-cluster_1
22	0.239836	0.224672	0.0151646	0.142782	0.139673	0.00310901	0.427502	0.579526	0.711377	0.878131	0.500333	ENCFF395XSI	DNASE:C57BL/6 liver male embryo (14.5 days)
271	1.4473	1.56451	-0.11721	0.61733	0.620231	-0.00290066	0.428036	0.579652	0.903695	0.957916	0.50033	ENCFF674URL	CHIP:CEBPB:C3H C2C12
421	0.514023	0.511533	0.00249016	0.405488	0.404343	0.0011456	0.428324	0.579652	0.820655	0.927968	0.500329	ENCFF630HUU	CHIP:GATA2:129 G1E
886	2.98319	2.91403	0.069155	1.06559	1.06275	0.00283885	0.428667	0.579652	0.977853	0.992349	0.500327	ENCFF009QET	CHIP:H3K27me3:C57BL/6 neural tube embryo (13.5 days)
656	2.44593	2.34873	0.0971968	0.867547	0.863212	0.00433463	0.42933	0.579652	0.736227	0.885069	0.500324	ENCFF746ONG	CHIP:H3K4me1:C57BL/6 heart embryo (16.5 days)
350	4.48677	4.54564	-0.0588646	1.38311	1.38475	-0.00164413	0.429359	0.579652	0.850948	0.942121	0.500324	ENCFF029TZQ	CHIP:H3K27me3:DBA/2 MEL cell line
133	1.04796	1.0193	0.0286583	0.598726	0.594567	0.00415903	0.432232	0.583052	0.754577	0.893329	0.500311	ENCFF810TCB	ATAC:C57BL/6 midbrain embryo (13.5 days)
606	1.23643	1.23693	-0.000501633	0.702653	0.705024	-0.00237137	0.433217	0.583901	0.516193	0.770304	0.500306	ENCFF421HSW	CHIP:H3K9me3:C57BL/6 embryonic facial prominence embryo (13.5 days)
439	0.845652	0.819903	0.0257496	0.478045	0.476176	0.00186962	0.434472	0.585112	0.996846	0.998061	0.5003	ENCFF133UFU	CHIP:ZMIZ1:B10.H-2aH-4bp/Wts CH12.LX
946	1.65877	1.64707	0.0117019	0.812937	0.813434	-0.000496745	0.43669	0.587441	0.736627	0.885069	0.50029	ENCFF672EXE	CHIP:H3K9me3:C57BL/6 hindbrain embryo (10.5 days)
703	0.576594	0.578257	-0.00166321	0.429106	0.430849	-0.00174299	0.43731	0.587441	0.629781	0.842733	0.500287	ENCFF776ZXU	CHIP:H3K9me3:C57BL/6 intestine embryo (15.5 days)
211	0.327784	0.316284	0.0115001	0.190234	0.188477	0.00175777	0.43755	0.587441	0.776076	0.906472	0.500286	UW4.2	ATAC:B_cells-clusters_4-cluster_2
352	2.18829	2.07172	0.11657	0.750778	0.749135	0.0016439	0.437631	0.587441	0.921971	0.96607	0.500286	ENCFF279GJP	CHIP:H3K79me2:DBA/2 MEL cell line
1113	0.287789	0.292313	-0.00452313	0.244249	0.243322	0.000926733	0.439195	0.589059	0.870775	0.94766	0.500279	GSM1094255	CHIP:CEBPb:CEBPB_Tg_ChIP-seq / CEBPB_Tg_ChIP-seq / Primary dermal fibroblasts
667	2.03002	1.99633	0.0336862	0.911389	0.909372	0.00201768	0.442563	0.592638	0.718426	0.879058	0.500263	ENCFF408PKX	CHIP:H3K27me3:C57BL/6 hindbrain embryo (15.5 days)
1224	1.425	1.46091	-0.0359099	0.781963	0.782538	-0.000575066	0.442585	0.592638	0.870128	0.94766	0.500263	GSM2390586	CHIP:.:ChIP-seq Rpc4 , ZT10, rep1, Maf1 KO / Liver / .
1120	0.355034	0.354953	8.16286e-05	0.29869	0.297314	0.00137633	0.442972	0.592673	0.829858	0.931323	0.500261	GSM1176714	CHIP:SREBP1:SREBP1 (ZT22) / SREBP1_ZT22, liver cells / .
1027	2.65051	2.60398	0.0465274	1.01538	1.01214	0.00323534	0.445133	0.595081	0.449288	0.737443	0.500251	ENCFF024LWP	CHIP:H3K27me3:C57BL/6 lung embryo (15.5 days)
221	0.178601	0.174231	0.00437008	0.128769	0.127055	0.0017141	0.445999	0.595753	0.731165	0.885069	0.500247	UW7.1	ATAC:Cardiomyocytes-clusters_7-cluster_1
1052	1.73339	1.69628	0.0371029	0.742236	0.74066	0.00157654	0.44653	0.595978	0.739986	0.885069	0.500245	ENCFF043PGB	CHIP:H3K4me1:C57BL/6 stomach embryo (16.5 days)
721	3.15502	3.09149	0.0635207	0.825872	0.824048	0.00182438	0.447001	0.596122	0.570182	0.801853	0.500243	ENCFF877BSP	CHIP:H3K4me2:C57BL/6 intestine postnatal (0 days)
796	2.61841	2.56975	0.0486565	0.757441	0.751702	0.00573856	0.447587	0.59642	0.843168	0.93603	0.50024	ENCFF053JUA	CHIP:H3K4me3:C57BL/6 liver embryo (11.5 days)
670	2.08957	2.06623	0.0233388	0.651254	0.647935	0.00331867	0.448169	0.596711	0.898729	0.955736	0.500237	ENCFF377ZXP	CHIP:H3K4me3:C57BL/6 lung postnatal (0 days)
793	1.86942	1.80901	0.0604098	0.768287	0.764475	0.00381136	0.451074	0.600092	0.456909	0.742644	0.500224	ENCFF131MXX	CHIP:H3K4me1:C57BL/6 heart embryo (12.5 days)
250	0.5785	0.575691	0.00280929	0.38232	0.380254	0.00206584	0.453628	0.602919	0.939774	0.976011	0.500212	ENCFF222EBN	CHIP:H3ac:C3H myocyte originated from C2C12
37	0.343696	0.324726	0.0189705	0.179369	0.177262	0.00210731	0.454055	0.602919	0.920863	0.96607	0.50021	ENCFF546FZT	DNASE:C57BL/6 spleen male adult (8 weeks)
1029	0.943502	0.947237	-0.00373542	0.601647	0.604892	-0.00324494	0.454366	0.602919	0.0804404	0.310973	0.500209	ENCFF377LTJ	CHIP:H3K9me3:C57BL/6 midbrain embryo (15.5 days)
274	2.63567	2.59392	0.0417483	0.924122	0.923091	0.00103056	0.454666	0.602919	0.734733	0.885069	0.500207	ENCFF021EDM	CHIP:H3K4me1:C57BL/6 heart male adult (8 weeks)
1017	3.04305	2.96981	0.0732455	1.07602	1.07342	0.00260568	0.455447	0.603467	0.87944	0.948294	0.500204	ENCFF637PDW	CHIP:H3K27me3:C57BL/6 hindbrain embryo (13.5 days)
815	2.78565	2.66219	0.12346	0.721474	0.71617	0.00530457	0.456753	0.60471	0.84611	0.938314	0.500198	ENCFF487TJN	CHIP:H3K4me3:C57BL/6 liver embryo (12.5 days)
88	0.242376	0.229993	0.0123822	0.15311	0.149512	0.00359815	0.457808	0.605549	0.364365	0.665771	0.500193	ENCFF125IRZ	DNASE:C57BL/6 thymus postnatal (0 days)
1236	0.509863	0.518908	-0.0090456	0.342836	0.344254	-0.00141788	0.458124	0.605549	0.477551	0.756304	0.500191	GSM647030	CHIP:.:Rev-erba ChIP at ZT22 / Liver / .
699	1.87172	1.86165	0.0100638	0.778775	0.777273	0.00150192	0.459153	0.606271	0.901303	0.957853	0.500187	ENCFF323FCP	CHIP:H3K4me1:C57BL/6 liver postnatal (0 days)
653	4.07752	3.97016	0.107362	1.20565	1.20044	0.00521255	0.459408	0.606271	0.826224	0.929541	0.500186	ENCFF800NSG	CHIP:H3K27me3:C57BL/6 liver embryo (11.5 days)
142	1.07889	1.06201	0.0168806	0.625494	0.623025	0.00246841	0.460173	0.606469	0.866465	0.947174	0.500182	ENCFF309CAW	ATAC:C57BL/6 neural tube embryo (15.5 days)
247	5.65113	5.66041	-0.00928545	1.48368	1.48238	0.00130129	0.460296	0.606469	0.936291	0.973662	0.500182	ENCFF962JNF	CHIP:H3K27me3:C3H C2C12
1203	1.36616	1.40696	-0.0407935	0.772214	0.773113	-0.000899196	0.461691	0.607819	0.894741	0.955229	0.500175	GSM2390508	CHIP:.:ChIP-seq Rpc4 , ZT02, rep1, CONTROL / Liver / .
950	1.58572	1.58664	-0.000918508	0.817445	0.819581	-0.00213671	0.462445	0.608324	0.30987	0.620284	0.500172	ENCFF933OKD	CHIP:H3K9me3:C57BL/6 embryonic facial prominence embryo (14.5 days)
568	1.63785	1.60009	0.0377606	0.732476	0.728192	0.00428367	0.463981	0.608551	0.69158	0.866911	0.500165	ENCFF633MDI	CHIP:H3K4me1:C57BL/6 embryonic facial prominence embryo (15.5 days)
558	2.27348	2.23705	0.0364244	0.970265	0.968812	0.00145328	0.464038	0.608551	0.930511	0.971919	0.500164	ENCFF183CXT	CHIP:H3K27me3:C57BL/6 forebrain postnatal (0 days)
942	1.16741	1.16617	0.00124156	0.68445	0.686225	-0.00177521	0.46413	0.608551	0.492016	0.76067	0.500164	ENCFF814OZR	CHIP:H3K9me3:C57BL/6 intestine embryo (14.5 days)
521	1.86963	1.84097	0.0286639	0.853097	0.849055	0.00404143	0.465108	0.608551	0.820516	0.927968	0.500159	ENCFF210YRR	CHIP:H3K27me3:C57BL/6 lung postnatal (0 days)
315	2.08177	2.05831	0.0234609	0.798709	0.79746	0.0012486	0.465613	0.608551	0.741604	0.885506	0.500157	ENCFF159RUF	CHIP:H3K4me1:C57BL/6 small intestine male adult (8 weeks)
137	1.18163	1.15488	0.0267515	0.641619	0.638762	0.00285721	0.46562	0.608551	0.962733	0.989677	0.500157	ENCFF654YSF	ATAC:C57BL/6 forebrain embryo (13.5 days)
716	1.40181	1.40804	-0.00623131	0.763609	0.767754	-0.00414556	0.466235	0.608551	0.257448	0.576276	0.500154	ENCFF779TQD	CHIP:H3K9me3:C57BL/6 hindbrain embryo (13.5 days)
261	0.758598	0.766941	-0.00834268	0.434767	0.435188	-0.000421494	0.46641	0.608551	0.995012	0.997747	0.500154	ENCFF595PRV	CHIP:MAX:C3H myocyte originated from C2C12
426	0.474785	0.460111	0.0146738	0.34777	0.347301	0.000469327	0.46657	0.608551	0.915785	0.965128	0.500153	ENCFF653ZIY	CHIP:TAL1:129 G1E-ER4 treated with 10 nM 17B-estradiol for 24 hours
1218	1.20474	1.25392	-0.0491785	0.679004	0.68295	-0.00394648	0.466869	0.608551	0.666573	0.852943	0.500151	GSM2390562	CHIP:.:ChIP-seq Rpc4 , ZT10, rep1, Arntl KO / Liver / .
584	3.41276	3.26746	0.1453	0.81186	0.805063	0.0067966	0.467036	0.608551	0.87506	0.948294	0.500151	ENCFF899RFO	CHIP:H3K4me2:C57BL/6 liver embryo (12.5 days)
759	2.23028	2.1802	0.0500827	0.833694	0.831085	0.00260895	0.467062	0.608551	0.995926	0.997747	0.500151	ENCFF534WMK	CHIP:H3K4me1:C57BL/6 lung embryo (16.5 days)
739	1.19102	1.19138	-0.000361323	0.697799	0.699885	-0.00208622	0.467756	0.608973	0.339077	0.644056	0.500147	ENCFF809PQF	CHIP:H3K9me3:C57BL/6 forebrain embryo (16.5 days)
215	0.216975	0.213484	0.00349072	0.178061	0.175122	0.0029387	0.469211	0.610383	0.344249	0.647882	0.500141	UW5.2	ATAC:Ex_neurons_SCPN-clusters_5-cluster_2
1099	0.59104	0.592392	-0.00135177	0.435121	0.436801	-0.0016799	0.4698	0.610665	0.948746	0.980988	0.500138	ENCFF417JCK	CHIP:H3K9me3:C57BL/6 stomach embryo (15.5 days)
267	0.9578	0.939142	0.0186581	0.466263	0.464991	0.00127181	0.470676	0.611321	0.99089	0.995755	0.500134	ENCFF539PGU	CHIP:MYOD1:C3H myocyte originated from C2C12
275	1.93598	1.91758	0.0183935	0.806049	0.805172	0.000876606	0.471591	0.611874	0.910151	0.962277	0.50013	ENCFF192PPW	CHIP:H3K4me1:C57BL/6 kidney male adult (8 weeks)
158	0.135923	0.134268	0.00165558	0.123489	0.122435	0.00105322	0.472034	0.611874	0.917057	0.96523	0.500128	UW14.1	ATAC:Sperm-clusters_14-cluster_1
166	0.266811	0.267149	-0.000337809	0.175589	0.175672	-8.3819e-05	0.472219	0.611874	0.858516	0.945964	0.500127	UW16.3	ATAC:Microglia-clusters_16-cluster_3
397	5.42607	5.386	0.0400701	1.45514	1.4522	0.0029422	0.473237	0.612709	0.848371	0.939901	0.500122	ENCFF331NCU	CHIP:H3K27me3:CD-1 megakaryocyte embryo (14.5 days)
1226	1.67317	1.69163	-0.0184629	0.837352	0.836248	0.00110453	0.474088	0.613329	0.98918	0.995755	0.500118	GSM2390588	CHIP:.:ChIP-seq Rpc4 , ZT18, rep1, Maf1 KO / Liver / .
531	1.10585	1.11191	-0.00605142	0.45136	0.449674	0.00168622	0.476141	0.6155	0.616019	0.834159	0.500109	ENCFF186QKQ	CHIP:CTCF:C57BL/6 liver postnatal (0 days)
386	2.22392	2.10868	0.115239	0.669299	0.664962	0.00433648	0.477908	0.617298	0.464293	0.747876	0.500101	ENCFF867PYD	CHIP:H3K27ac:B10.H-2aH-4bp/Wts CH12.LX
1193	1.01152	1.04046	-0.0289477	0.533661	0.536433	-0.00277287	0.481864	0.621918	0.66954	0.85408	0.500083	GSM1659693	CHIP:.:RORgamma_liver_ZT10 / liver / .
991	0.61148	0.596959	0.0145215	0.394404	0.394126	0.000277549	0.48519	0.625131	0.954586	0.984459	0.500068	ENCFF338GTZ	CHIP:EP300:C57BL/6 heart postnatal (0 days)
336	1.80257	1.69621	0.106367	0.535572	0.533338	0.00223374	0.485292	0.625131	0.719279	0.879297	0.500067	ENCFF309BER	CHIP:H3K4me3:C57BL/6 liver embryo (14.5 days)
726	2.10076	2.06144	0.0393238	0.921776	0.919654	0.00212276	0.485626	0.625131	0.995036	0.997747	0.500066	ENCFF149AGA	CHIP:H3K27me3:C57BL/6 midbrain postnatal (0 days)
746	0.496401	0.501335	-0.00493467	0.303534	0.303936	-0.000402659	0.485875	0.625131	0.786195	0.910214	0.500064	ENCFF454YWR	CHIP:CTCF:129 E14TG2a.4
236	4.441	4.5173	-0.0762959	1.37728	1.38032	-0.00303936	0.488429	0.627926	0.72793	0.88423	0.500053	ENCFF268EAZ	CHIP:H3K27me3:DBA/2 MEL cell line treated with 2% dimethyl sulfoxide for 5 days
1078	2.69333	2.63531	0.0580153	1.00997	1.00802	0.00194228	0.490261	0.629286	0.972624	0.991463	0.500044	ENCFF787DNX	CHIP:H3K27me3:C57BL/6 hindbrain embryo (14.5 days)
589	1.49135	1.4929	-0.00154686	0.792189	0.794596	-0.00240701	0.490284	0.629286	0.735508	0.885069	0.500044	ENCFF637DCW	CHIP:H3K9me3:C57BL/6 heart embryo (16.5 days)
899	1.99131	1.87304	0.11827	0.696154	0.69194	0.00421381	0.490891	0.629286	0.883488	0.949981	0.500042	ENCFF705MBY	CHIP:H3K9ac:C57BL/6 liver embryo (12.5 days)
732	1.47813	1.4826	-0.00446796	0.786515	0.790235	-0.0037201	0.491049	0.629286	0.297614	0.615843	0.500041	ENCFF495VRT	CHIP:H3K9me3:C57BL/6 neural tube embryo (13.5 days)
242	4.58693	4.59224	-0.00531054	1.36775	1.36703	0.000719786	0.491402	0.629286	0.882871	0.949981	0.500039	ENCFF488BZX	CHIP:H3K27me3:C3H myocyte originated from C2C12
1042	1.14253	1.09065	0.0518879	0.52621	0.523807	0.00240266	0.492192	0.629807	0.909644	0.962277	0.500036	ENCFF720WRB	CHIP:H3K9ac:C57BL/6 liver embryo (15.5 days)
402	2.77936	2.61765	0.16171	0.890295	0.887149	0.00314599	0.495382	0.633351	0.522884	0.77585	0.500021	ENCFF007WLT	CHIP:H3K4me1:CD-1 erythroblast embryo (14.5 days)
1153	4.74883	4.90918	-0.160356	1.17202	1.17538	-0.00336254	0.495733	0.633351	0.474858	0.756304	0.500019	GSM1446075	CHIP:GR:ChIP-exo, Liver_GR_WT_6pm / Liver tissue / .
427	0.554786	0.525299	0.0294874	0.34801	0.34674	0.0012694	0.497267	0.634817	0.982158	0.995045	0.500012	ENCFF263FFV	CHIP:TAL1:129 G1E
534	2.16395	2.07381	0.0901339	0.823221	0.819862	0.00335872	0.49802	0.635285	0.995593	0.997747	0.500009	ENCFF419CPS	CHIP:H3K4me1:C57BL/6 liver embryo (13.5 days)
21	0.293299	0.290622	0.0026767	0.193472	0.193984	-0.000512585	0.498994	0.635548	0.968932	0.991463	0.500005	ENCFF650OFZ	DNASE:C57BL/6 large intestine male adult (8 weeks)
1143	2.7414	2.81637	-0.0749705	0.949623	0.951591	-0.00196844	0.499389	0.635548	0.935519	0.973662	0.500003	GSM1446065	CHIP:GR:ChIP-seq, Liver_GR_WT_6am / Liver tissue / .
1119	0.403693	0.402004	0.00168899	0.335751	0.334126	0.0016242	0.499781	0.635548	0.809052	0.920307	0.500001	GSM1176713	CHIP:SREBP1:SREBP1 (ZT18) / SREBP1_ZT18, liver cells / .
785	1.3445	1.34965	-0.00515425	0.753685	0.756831	-0.00314593	0.500041	0.635548	0.607289	0.82803	0.5	ENCFF637BYB	CHIP:H3K9me3:C57BL/6 hindbrain embryo (16.5 days)
891	2.53926	2.55807	-0.0188074	0.740549	0.737025	0.00352395	0.500161	0.635548	0.984532	0.995755	0.499999	ENCFF564SDZ	CHIP:H3K4me3:C57BL/6 heart embryo (11.5 days)
1087	1.57865	1.51962	0.0590248	0.656531	0.652837	0.00369388	0.501072	0.63619	0.946627	0.980562	0.499995	ENCFF483COK	CHIP:H3K9ac:C57BL/6 liver postnatal (0 days)
924	2.6913	2.59447	0.0968242	0.918535	0.915076	0.00345922	0.501583	0.63619	0.622754	0.837303	0.499993	ENCFF673JMS	CHIP:H3K4me1:C57BL/6 heart embryo (13.5 days)
135	0.0273832	0.0269783	0.000404993	0.0248254	0.0247125	0.000112981	0.501827	0.63619	0.799565	0.916613	0.499992	ENCFF320TGF	ATAC:C57BL/6 monocyte adult (5-6 weeks)
970	3.05203	2.93878	0.113251	0.794961	0.790295	0.00466549	0.502574	0.636646	0.696171	0.869816	0.499988	ENCFF311RNJ	CHIP:H3K4me2:C57BL/6 heart embryo (11.5 days)
1150	5.27816	5.43225	-0.154086	1.29557	1.29787	-0.00230289	0.503895	0.637827	0.728477	0.88423	0.499982	GSM1446072	CHIP:GR:ChIP-exo, Liver_GR_GRdim_6pm / Liver tissue / .
253	1.09737	1.16496	-0.0675924	0.550834	0.553461	-0.0026263	0.506956	0.641208	0.838967	0.932627	0.499968	ENCFF096FAR	CHIP:CEBPB:C3H myocyte originated from C2C12
286	2.00873	2.03695	-0.0282147	0.792657	0.79357	-0.000912666	0.50778	0.641756	0.745913	0.887531	0.499964	ENCFF353PNU	CHIP:H3K4me1:C57BL/6 embryonic fibroblast male embryo (13.5 weeks)
1244	0.42338	0.434313	-0.0109332	0.279902	0.280512	-0.000610411	0.50877	0.642513	0.718548	0.879058	0.49996	GSM864668	CHIP:.:LXR ChIP WT Bexarotene / C57BL/6 wild type mouse liver / .
269	0.5581	0.552878	0.00522214	0.354931	0.355094	-0.00016278	0.509631	0.642761	0.76837	0.901094	0.499956	ENCFF122ZAR	CHIP:MYOD1:C3H myocyte originated from C2C12
1145	3.52633	3.62148	-0.0951583	1.10229	1.10393	-0.00163746	0.509961	0.642761	0.819012	0.927968	0.499955	GSM1446067	CHIP:GR:ChIP-seq, Liver_GR_WT_pred_6am / Liver tissue / .
1261	0.0658802	0.0682589	-0.00237869	0.0590107	0.0598028	-0.000792123	0.51014	0.642761	0.795654	0.914167	0.499954	GSM873424	CHIP:CHOP:Chop+/+ Tm ChIP-seq / Mouse embronic fibroblast / Mouse embryonic fibroblast
216	0.226311	0.222221	0.00409096	0.181841	0.178584	0.0032569	0.511541	0.643672	0.397786	0.69825	0.499947	UW5.3	ATAC:Ex_neurons_CThPN-clusters_5-cluster_3
986	2.17806	2.08672	0.0913405	0.83321	0.829757	0.00345361	0.511966	0.643672	0.964639	0.990475	0.499945	ENCFF335NBL	CHIP:H3K4me1:C57BL/6 liver embryo (12.5 days)
524	0.78642	0.78676	-0.000340044	0.532336	0.533844	-0.0015077	0.512038	0.643672	0.83555	0.931989	0.499945	ENCFF367TZB	CHIP:H3K9me3:C57BL/6 limb embryo (15.5 days)
1135	3.79593	3.80564	-0.0097177	1.06671	1.06309	0.00361907	0.514068	0.645062	0.623287	0.837335	0.499936	GSM1301669	CHIP:CLOCK:ZT8 CLOCK ChIP Seq-1 / Liver / .
143	0.0259476	0.0253524	0.000595117	0.0256375	0.0250977	0.000539789	0.514601	0.645062	0.831886	0.931847	0.499933	UW1.1	ATAC:Unknown-clusters_1-cluster_1
116	0.952295	0.925017	0.0272774	0.563389	0.559761	0.00362808	0.514695	0.645062	0.947719	0.980562	0.499933	ENCFF609BWE	ATAC:C57BL/6 hindbrain postnatal (0 days)
1067	1.19522	1.18065	0.0145653	0.611557	0.611985	-0.000427425	0.514715	0.645062	0.942119	0.977211	0.499933	ENCFF629BDF	CHIP:H3K4me1:C57BL/6 stomach postnatal (0 days)
266	1.02408	1.00401	0.020069	0.4766	0.475714	0.000886053	0.5168	0.646815	0.836415	0.931989	0.499923	ENCFF602DCT	CHIP:USF1:C3H C2C12
120	0.819956	0.797204	0.0227516	0.483484	0.48284	0.00064376	0.516962	0.646815	0.58038	0.807422	0.499923	ENCFF513ECX	ATAC:C57BL/6 G1E-ER4 treated with 10 nM 17B-estradiol for 24 hours
281	2.67172	2.55834	0.113379	0.74803	0.743799	0.00423074	0.517294	0.646815	0.82241	0.928154	0.499921	ENCFF118SXS	CHIP:H3K4me3:C57BL/6 heart male adult (8 weeks)
141	1.16354	1.13823	0.0253145	0.637915	0.635126	0.00278854	0.519092	0.647775	0.973028	0.991463	0.499913	ENCFF487YTM	ATAC:C57BL/6 forebrain embryo (15.5 days)
1074	1.1834	1.18479	-0.00139177	0.692373	0.695325	-0.00295156	0.519262	0.647775	0.551088	0.789396	0.499912	ENCFF966CDF	CHIP:H3K9me3:C57BL/6 midbrain embryo (14.5 days)
895	2.37365	2.24993	0.123725	0.69422	0.686828	0.0073927	0.519526	0.647775	0.695855	0.869816	0.499911	ENCFF296YDU	CHIP:H3K4me2:C57BL/6 intestine embryo (15.5 days)
92	0.300558	0.299459	0.00109938	0.200057	0.200013	4.41372e-05	0.519741	0.647775	0.764867	0.899554	0.49991	ENCFF325RFB	DNASE:C57BL/6 adipocyte
931	1.33982	1.31861	0.0212137	0.653252	0.652272	0.000980139	0.520364	0.647775	0.966361	0.990475	0.499907	ENCFF317OTS	CHIP:H3K4me1:C57BL/6 kidney postnatal (0 days)
597	1.845	1.78268	0.0623168	0.762296	0.760774	0.00152218	0.520428	0.647775	0.912728	0.964113	0.499907	ENCFF909TOQ	CHIP:H3K4me1:C57BL/6 liver embryo (15.5 days)
1154	4.47923	4.62562	-0.14639	1.19844	1.20153	-0.00308895	0.521916	0.64899	0.656939	0.848546	0.4999	GSM1446076	CHIP:GR:ChIP-exo, Liver_GR_WT_pred_6am / Liver tissue / .
1196	2.75656	2.82548	-0.0689147	0.958427	0.958278	0.00014919	0.522194	0.64899	0.986549	0.995755	0.499899	GSM1659697	CHIP:.:HDAC3_liver_Rev-erbsflCRE(DBDm)_ZT10_rep1 / liver / .
129	0.932327	0.911843	0.020484	0.552424	0.551011	0.0014134	0.527527	0.655122	0.981401	0.995045	0.499874	ENCFF196PJB	ATAC:C57BL/6 kidney embryo (16.5 days)
348	2.17113	2.15028	0.0208483	0.86717	0.869258	-0.00208783	0.529704	0.657042	0.697323	0.869933	0.499864	ENCFF157PQZ	CHIP:H3K79me2:C57BL/6 liver male adult (8 weeks)
832	3.06879	3.06417	0.00462055	0.774141	0.771042	0.00309896	0.529936	0.657042	0.902627	0.957916	0.499863	ENCFF054NVM	CHIP:H3K4me3:C57BL/6 heart embryo (13.5 days)
112	1.01452	0.990344	0.0241722	0.593686	0.592618	0.00106788	0.530414	0.657042	0.995058	0.997747	0.499861	ENCFF060HRT	ATAC:C57BL/6 forebrain embryo (11.5 days)
1219	1.48354	1.53896	-0.0554284	0.777685	0.781532	-0.00384712	0.530867	0.657042	0.953329	0.984459	0.499859	GSM2390563	CHIP:.:ChIP-seq Rpc4 , ZT14, rep1, Arntl KO / Liver / .
230	1.89907	1.89401	0.00505793	0.745119	0.742232	0.00288779	0.531073	0.657042	0.855178	0.944259	0.499858	ENCFF240MDV	CHIP:H3K4me3:129 ES-E14
299	0.620825	0.628375	-0.00755024	0.381593	0.381411	0.000181764	0.5336	0.659672	0.669073	0.85408	0.499846	ENCFF919KIP	CHIP:CTCF:C57BL/6 liver male adult (8 weeks)
840	2.32276	2.24984	0.0729213	0.703633	0.697409	0.00622463	0.535032	0.66043	0.780142	0.907129	0.49984	ENCFF235MDM	CHIP:H3K4me2:C57BL/6 kidney postnatal (0 days)
849	1.84953	1.80928	0.0402489	0.771073	0.76777	0.00330299	0.535323	0.66043	0.683417	0.863033	0.499839	ENCFF606BGM	CHIP:H3K4me1:C57BL/6 limb embryo (14.5 days)
73	0.255564	0.258486	-0.00292215	0.164355	0.163995	0.000360802	0.535476	0.66043	0.972962	0.991463	0.499838	ENCFF435DKT	DNASE:C57BL/6 3T3-L1
105	0.983708	0.960287	0.0234213	0.581463	0.578684	0.00277936	0.535821	0.66043	0.970605	0.991463	0.499836	ENCFF860QUH	ATAC:C57BL/6 hindbrain embryo (12.5 days)
676	1.06524	1.06647	-0.00122845	0.647678	0.65051	-0.00283229	0.537498	0.662	0.560013	0.793701	0.499829	ENCFF034URR	CHIP:H3K9me3:C57BL/6 forebrain embryo (14.5 days)
366	0.864279	0.861719	0.00255913	0.547794	0.547799	-4.64916e-06	0.538203	0.662373	0.929984	0.971919	0.499825	ENCFF575UNY	CHIP:POLR2A:C57BL/6 bone marrow macrophage male adult (8 weeks)
778	1.86731	1.80371	0.0635995	0.783059	0.779124	0.00393504	0.539358	0.663297	0.640303	0.845599	0.49982	ENCFF654PSV	CHIP:H3K4me1:C57BL/6 liver embryo (11.5 days)
917	2.54527	2.5653	-0.0200355	0.707956	0.706381	0.00157493	0.53994	0.663492	0.579575	0.807422	0.499817	ENCFF109NPC	CHIP:H3K4me3:C57BL/6 heart embryo (15.5 days)
1231	1.97211	2.03775	-0.0656426	0.772257	0.775446	-0.00318944	0.540324	0.663492	0.70528	0.874547	0.499816	GSM647022	CHIP:.:HDAC3 ChIP at ZT10-1 / Liver / .
147	0.108829	0.107716	0.00111381	0.091578	0.0918795	-0.00030145	0.54147	0.664403	0.863119	0.947064	0.49981	UW11.1	ATAC:Proximal_tubule-clusters_11-cluster_1
409	3.30296	3.26771	0.0352423	1.05709	1.05771	-0.000623345	0.541913	0.66445	0.92105	0.96607	0.499808	ENCFF817HHK	CHIP:H3K4me1:CD-1 megakaryocyte embryo (14.5 days)
878	1.26072	1.26531	-0.0045917	0.72837	0.731732	-0.0033617	0.542471	0.664639	0.643617	0.846135	0.499806	ENCFF390PNF	CHIP:H3K9me3:C57BL/6 midbrain embryo (16.5 days)
863	0.982053	0.987909	-0.0058561	0.619305	0.623437	-0.00413221	0.543443	0.665333	0.231535	0.544632	0.499801	ENCFF987UOT	CHIP:H3K9me3:C57BL/6 neural tube embryo (15.5 days)
1010	1.50519	1.47958	0.0256141	0.687413	0.686509	0.000903666	0.545942	0.667895	0.888026	0.952989	0.49979	ENCFF451RNW	CHIP:H3K4me1:C57BL/6 lung embryo (14.5 days)
729	3.30549	3.11123	0.19426	0.798961	0.793909	0.00505209	0.547029	0.668727	0.877243	0.948294	0.499785	ENCFF275WHD	CHIP:H3K4me2:C57BL/6 liver embryo (14.5 days)
205	0.222224	0.22922	-0.00699629	0.151568	0.151563	5.06639e-06	0.548236	0.669704	0.947737	0.980562	0.499779	UW3.1	ATAC:Hepatocytes-clusters_3-cluster_1
94	4.9952	5.05809	-0.0628901	1.23198	1.23259	-0.000611067	0.549061	0.670213	0.763543	0.898646	0.499775	GSM1479702	DNASE:DNase ZT 6 WT / Liver, WT, ZT 6, DNase / .
223	0.264851	0.26139	0.00346124	0.190305	0.188009	0.00229612	0.551768	0.672763	0.617938	0.834159	0.499763	UW8.1	ATAC:Cerebellar_granule_cells-clusters_8-cluster_1
285	2.60321	2.58205	0.0211611	0.936867	0.936496	0.000371218	0.551968	0.672763	0.913436	0.964113	0.499762	ENCFF206LES	CHIP:H3K4me1:C57BL/6 lung male adult (8 weeks)
1246	0.663901	0.685034	-0.0211329	0.363968	0.364568	-0.000600249	0.55566	0.676658	0.879611	0.948294	0.499745	GSM864670	CHIP:.:LXR ChIP WT T0901317 / C57BL/6 wild type mouse liver / .
23	0.225082	0.210308	0.0147744	0.137884	0.135	0.00288396	0.556258	0.676658	0.87769	0.948294	0.499742	ENCFF906XJY	DNASE:129 liver male embryo (14.5 days)
1142	3.01947	3.1029	-0.0834272	1.01352	1.01481	-0.001297	0.5564	0.676658	0.961147	0.988832	0.499742	GSM1446064	CHIP:GR:ChIP-seq, Liver_GR_GRdim_pred_6am / Liver tissue / .
148	0.23236	0.228936	0.00342396	0.162228	0.161147	0.00108109	0.557868	0.677942	0.903635	0.957916	0.499735	UW11.2	ATAC:Proximal_tubule-clusters_11-cluster_2
117	0.0292937	0.0285243	0.000769414	0.0249554	0.0246642	0.000291191	0.560287	0.680378	0.982327	0.995045	0.499724	ENCFF161EJL	ATAC:C57BL/6 neutrophil adult (5-6 weeks)
615	1.14928	1.13841	0.0108666	0.596484	0.597637	-0.0011524	0.562175	0.682167	0.958537	0.986764	0.499715	ENCFF028YVD	CHIP:H3K4me1:C57BL/6 intestine postnatal (0 days)
371	1.28162	1.28299	-0.00136936	0.713685	0.714487	-0.000802577	0.563919	0.683672	0.987464	0.995755	0.499707	ENCFF324KCF	CHIP:H3K27me3:C57BL/6 kidney male adult (8 weeks)
813	0.850458	0.845604	0.00485373	0.562429	0.563318	-0.000889361	0.564248	0.683672	0.646007	0.846135	0.499705	ENCFF973ZKZ	CHIP:H3K9me3:C57BL/6 neural tube embryo (11.5 days)
246	4.91387	4.88642	0.027451	1.06454	1.06496	-0.000425577	0.5685	0.688317	0.769145	0.901359	0.499686	ENCFF442ENM	CHIP:H3K79me2:C3H C2C12
358	2.14355	2.15264	-0.00908303	0.864016	0.864666	-0.000649631	0.569125	0.688566	0.679616	0.861581	0.499683	ENCFF494KRZ	CHIP:H3K4me1:C57BL/6 brown adipose tissue male adult (24 weeks)
408	3.86442	3.82801	0.0364118	1.10573	1.10435	0.00138211	0.571225	0.690552	0.888884	0.953287	0.499673	ENCFF751XSP	CHIP:H3K4me1:B10.H-2aH-4bp/Wts CH12.LX
1252	0.578347	0.602929	-0.0245824	0.319182	0.320399	-0.00121734	0.571991	0.690552	0.750067	0.890135	0.49967	GSM864676	CHIP:.:RXR ChIP LXRdKO Bexarotene / C57BL/6 LXRdKO mouse liver / .
46	0.252438	0.249767	0.00267126	0.180658	0.179844	0.000814125	0.572028	0.690552	0.897217	0.955736	0.499669	ENCFF825ZVT	DNASE:129 ZHBTc4-mESC treated with 100 ng/mL doxycycline hyclate for 6 hours
1197	1.7702	1.82435	-0.0541518	0.745232	0.747382	-0.00214952	0.574282	0.692765	0.782326	0.907831	0.499659	GSM1659699	CHIP:.:HDAC3_liver_ZT10 / liver / .
144	0.0492596	0.0489313	0.000328269	0.0476973	0.047771	-7.37011e-05	0.575245	0.693417	0.589477	0.815245	0.499654	UW1.2	ATAC:Unknown-clusters_1-cluster_2
573	0.929477	0.92411	0.00536662	0.595152	0.595441	-0.000288904	0.576413	0.693631	0.76061	0.89776	0.499649	ENCFF947IGN	CHIP:H3K9me3:C57BL/6 liver embryo (16.5 days)
106	1.13983	1.11581	0.0240281	0.64407	0.641421	0.00264889	0.576453	0.693631	0.920765	0.96607	0.499649	ENCFF242FBC	ATAC:C57BL/6 midbrain embryo (16.5 days)
1	0.375207	0.368002	0.00720522	0.228483	0.227029	0.00145461	0.57767	0.693631	0.890797	0.953723	0.499643	ENCFF695LHM	DNASE:BALB/cAnN A20
1149	2.98705	3.07302	-0.0859737	0.977964	0.980421	-0.00245744	0.577742	0.693631	0.722464	0.88057	0.499643	GSM1446071	CHIP:GR:ChIP-exo, Liver_GR_GRdim_6am / Liver tissue / .
265	0.590352	0.585382	0.00497043	0.375193	0.375014	0.000178516	0.577895	0.693631	0.777857	0.907129	0.499642	ENCFF565MVR	CHIP:TCF3:C3H myocyte originated from C2C12
642	1.52592	1.47621	0.0497065	0.679548	0.680365	-0.00081706	0.577956	0.693631	0.934358	0.973662	0.499642	ENCFF263ROX	CHIP:H3K4me1:C57BL/6 liver embryo (14.5 days)
1240	4.53225	4.51129	0.0209522	1.23591	1.23555	0.000359416	0.578674	0.693986	0.867745	0.947256	0.499639	GSM647036	CHIP:.:H3K9ac at ZT22 / Liver / .
428	0.647386	0.663906	-0.01652	0.354849	0.356929	-0.00207984	0.579747	0.694308	0.508991	0.76908	0.499634	ENCFF498RZJ	CHIP:CTCF:DBA/2 MEL cell line
8	0.356474	0.341243	0.0152309	0.214779	0.21191	0.00286953	0.579788	0.694308	0.886971	0.952989	0.499633	ENCFF680ZTZ	DNASE:CD-1 c-Kit-positive CD71-positive TER-119-negative erythroid progenitor cells male embryo (14.5 days)
498	0.54173	0.533475	0.00825518	0.374907	0.376399	-0.00149229	0.585283	0.700378	0.871525	0.94766	0.499608	ENCFF428NKW	CHIP:MYB:DBA/2 MEL cell line
1263	1.4942	1.53912	-0.0449212	0.672376	0.675787	-0.00341183	0.587213	0.701711	0.742178	0.885547	0.499599	GSM873426	CHIP:ATF4:Atf4+/+ Tm ChIP-seq / Mouse embronic fibroblast / Mouse embryonic fibroblast
1151	3.46545	3.58518	-0.119723	1.04045	1.04309	-0.00264192	0.58725	0.701711	0.846367	0.938314	0.499599	GSM1446073	CHIP:GR:ChIP-exo, Liver_GR_GRdim_pred_6am / Liver tissue / .
1241	4.39344	4.3739	0.0195475	1.19462	1.19421	0.000412583	0.588437	0.702618	0.860797	0.946014	0.499593	GSM647037	CHIP:.:H3K9ac in HDAC3 KO liver at ZT10 / Liver / .
20	0.344304	0.330502	0.0138016	0.210998	0.209696	0.00130251	0.58971	0.703626	0.682182	0.863033	0.499587	ENCFF561HSI	DNASE:C57BL/6 kidney male adult (8 weeks)
243	4.4835	4.45097	0.0325375	1.08329	1.08601	-0.00272071	0.592641	0.706611	0.803888	0.917852	0.499573	ENCFF388RKS	CHIP:H3K79me2:C3H myocyte originated from C2C12
1234	0.855438	0.880726	-0.0252885	0.476434	0.47971	-0.00327599	0.594316	0.708094	0.875431	0.948294	0.499565	GSM647028	CHIP:.:NCoR ChIP at ZT22 / Liver / .
206	0.194279	0.18793	0.00634912	0.137993	0.135837	0.002156	0.594965	0.708258	0.829768	0.931323	0.499562	UW30.1	ATAC:Type_II_pneumocytes-clusters_30-cluster_1
76	0.278898	0.272357	0.00654137	0.172126	0.169881	0.00224467	0.595316	0.708258	0.763548	0.898646	0.499561	ENCFF919AUF	DNASE:C57BL/6 MN1
342	1.56534	1.56989	-0.00454247	0.781521	0.782165	-0.00064373	0.596618	0.708878	0.934936	0.973662	0.499555	ENCFF344SFV	CHIP:H3K27me3:C57BL/6 heart male adult (8 weeks)
626	0.996037	0.99328	0.00275683	0.622574	0.623248	-0.000673771	0.5967	0.708878	0.968888	0.991463	0.499554	ENCFF258AAD	CHIP:H3K9me3:C57BL/6 liver embryo (13.5 days)
272	0.814095	0.798127	0.0159689	0.425321	0.425543	-0.000221968	0.597408	0.709168	0.998998	0.998998	0.499551	ENCFF140UCV	CHIP:MYOG:C3H myocyte originated from C2C12
563	2.40886	2.32087	0.0879862	0.864808	0.862227	0.00258046	0.597808	0.709168	0.165381	0.46211	0.499549	ENCFF730VFB	CHIP:H3K4me1:C57BL/6 heart embryo (14.5 days)
122	1.19394	1.16874	0.025202	0.660514	0.658136	0.00237876	0.598892	0.709942	0.878558	0.948294	0.499544	ENCFF190LKP	ATAC:C57BL/6 midbrain embryo (15.5 days)
503	0.313871	0.315548	-0.00167662	0.255248	0.256815	-0.00156698	0.599537	0.710194	0.923093	0.966629	0.499541	ENCFF465SVV	CHIP:USF2:DBA/2 MEL cell line
264	1.21043	1.22389	-0.0134623	0.556498	0.557001	-0.000502765	0.600715	0.710428	0.62987	0.842733	0.499535	ENCFF862HLX	CHIP:MAX:C3H C2C12
1207	1.38656	1.43819	-0.0516293	0.779086	0.782783	-0.0036974	0.600848	0.710428	0.778701	0.907129	0.499535	GSM2390512	CHIP:.:ChIP-seq Rpc4 , ZT18, rep1, CONTROL / Liver / .
852	3.39017	3.25913	0.131032	0.820626	0.817345	0.00328082	0.601031	0.710428	0.913648	0.964113	0.499534	ENCFF159AEV	CHIP:H3K4me2:C57BL/6 heart embryo (14.5 days)
1249	0.612338	0.640884	-0.0285462	0.335459	0.337669	-0.00220934	0.602818	0.712028	0.812548	0.921973	0.499525	GSM864673	CHIP:.:RXR ChIP WT Bexarotene / C57BL/6 wild type mouse liver / .
356	2.8022	2.73579	0.0664046	0.694921	0.6937	0.00122094	0.6044	0.713383	0.524631	0.77585	0.499518	ENCFF496UKK	CHIP:H3K4me3:DBA/2 MEL cell line
1204	1.40783	1.44949	-0.0416619	0.781139	0.783548	-0.0024088	0.605475	0.714139	0.897759	0.955736	0.499513	GSM2390509	CHIP:.:ChIP-seq Rpc4 , ZT06, rep1, CONTROL / Liver / .
445	0.967694	0.94206	0.0256332	0.501692	0.503487	-0.00179535	0.60841	0.716635	0.640761	0.845599	0.499499	ENCFF217FQC	CHIP:CHD1:B10.H-2aH-4bp/Wts CH12.LX
1152	4.15545	4.27002	-0.114566	1.1508	1.15347	-0.0026685	0.608464	0.716635	0.857094	0.945105	0.499499	GSM1446074	CHIP:GR:ChIP-exo, Liver_GR_WT_6am / Liver tissue / .
938	1.35586	1.35901	-0.00314713	0.747826	0.75164	-0.00381416	0.609918	0.717834	0.792208	0.913564	0.499492	ENCFF463QJN	CHIP:H3K9me3:C57BL/6 hindbrain embryo (14.5 days)
85	0.351058	0.351444	-0.000385612	0.215498	0.215128	0.000370547	0.610986	0.718576	0.452354	0.73952	0.499487	ENCFF014NWA	DNASE:C57BL/6 acute myeloid leukemia
202	0.148542	0.143178	0.00536408	0.107288	0.105634	0.00165417	0.613329	0.720815	0.334652	0.64153	0.499476	UW28.1	ATAC:Immature_B_cells-clusters_28-cluster_1
1227	1.67618	1.70183	-0.0256501	0.838588	0.840501	-0.00191253	0.613907	0.720979	0.986476	0.995755	0.499473	GSM2390589	CHIP:.:ChIP-seq Rpc4 , ZT22, rep1, Maf1 KO / Liver / .
169	0.28375	0.282144	0.00160578	0.18289	0.183669	-0.00077951	0.615546	0.722387	0.464207	0.747876	0.499465	UW17.3	ATAC:Dendritic_cells-clusters_17-cluster_3
262	0.601089	0.599869	0.00122035	0.40964	0.408085	0.00155491	0.616385	0.722856	0.701852	0.872341	0.499461	ENCFF552PFK	CHIP:SRF:C3H myocyte originated from C2C12
232	5.62289	5.70375	-0.0808587	1.54012	1.54461	-0.00448918	0.621322	0.727797	0.567161	0.799868	0.499437	ENCFF409ARU	CHIP:H3K27me3:DBA/2 MEL cell line
844	1.39713	1.38592	0.0112041	0.666477	0.667238	-0.000761271	0.621485	0.727797	0.365193	0.665771	0.499437	ENCFF970OZN	CHIP:H3K4me1:C57BL/6 lung postnatal (0 days)
695	1.05301	1.05796	-0.00494838	0.643324	0.647908	-0.0045839	0.623618	0.729776	0.307181	0.620284	0.499426	ENCFF499LUF	CHIP:H3K9me3:C57BL/6 hindbrain embryo (15.5 days)
1216	1.28297	1.33089	-0.0479205	0.719898	0.72415	-0.0042522	0.624085	0.729801	0.76568	0.899866	0.499424	GSM2390560	CHIP:.:ChIP-seq Rpc4 , ZT02, rep1, Arntl KO / Liver / .
207	0.114371	0.111726	0.00264581	0.093289	0.0921213	0.00116769	0.625381	0.73028	0.798875	0.916586	0.499418	UW30.2	ATAC:Unknown-clusters_30-cluster_2
608	1.11516	1.11128	0.00388277	0.662113	0.663154	-0.00104034	0.625683	0.73028	0.998409	0.998998	0.499416	ENCFF741LSB	CHIP:H3K9me3:C57BL/6 liver embryo (12.5 days)
429	0.409399	0.398446	0.0109526	0.312539	0.312595	-5.61476e-05	0.625827	0.73028	0.965394	0.990475	0.499416	ENCFF279GQJ	CHIP:GATA1:129 G1E-ER4 treated with 10 nM 17B-estradiol for 24 hours
332	2.17339	2.16693	0.0064621	0.859926	0.859547	0.000378489	0.628834	0.733268	0.9203	0.96607	0.499401	ENCFF844ZFQ	CHIP:H3K4me1:C57BL/6 placenta female adult (8 weeks)
1138	4.35106	4.51877	-0.167707	1.19499	1.19926	-0.0042702	0.629743	0.733807	0.685595	0.863033	0.499397	GSM1437733	CHIP:E4BP4:E4BP4 Liver ZT22 ChIP-seq / liver / .
365	0.95923	0.962308	-0.00307792	0.545914	0.544718	0.00119662	0.631252	0.735044	0.37301	0.671901	0.49939	ENCFF826OQW	CHIP:CTCF:C57BL/6 bone marrow macrophage male adult (8 weeks)
575	1.6419	1.64439	-0.00249135	0.832149	0.836255	-0.00410593	0.634406	0.737548	0.480612	0.759106	0.499374	ENCFF637INN	CHIP:H3K9me3:C57BL/6 heart embryo (13.5 days)
1245	0.353799	0.363251	-0.00945175	0.245229	0.246211	-0.000982732	0.634527	0.737548	0.521012	0.775382	0.499374	GSM864669	CHIP:.:LXR ChIP WT Control / C57BL/6 wild type mouse liver / .
484	0.335965	0.334244	0.00172123	0.264962	0.267459	-0.00249749	0.634749	0.737548	0.774918	0.906472	0.499373	ENCFF369XQN	CHIP:MAFK:DBA/2 MEL cell line treated with 2% dimethyl sulfoxide for 5 days
176	0.229087	0.223997	0.00509068	0.161456	0.159643	0.00181228	0.636717	0.739005	0.454376	0.740674	0.499363	UW18.5	ATAC:Collecting_duct-clusters_18-cluster_5
925	0.975953	0.977577	-0.00162387	0.607657	0.610957	-0.00330031	0.636902	0.739005	0.79729	0.915408	0.499362	ENCFF718RMZ	CHIP:H3K9me3:C57BL/6 forebrain embryo (15.5 days)
1140	3.412	3.49305	-0.0810521	1.09708	1.09956	-0.00248039	0.64172	0.744069	0.904814	0.958485	0.499339	GSM1446062	CHIP:GR:ChIP-seq, Liver_GR_GRdim_6am / Liver tissue / .
109	1.07174	1.05013	0.0216111	0.615539	0.61359	0.00194907	0.643359	0.745443	0.865924	0.947174	0.499331	ENCFF321AYT	ATAC:C57BL/6 hindbrain embryo (13.5 days)
95	5.62733	5.70965	-0.0823274	1.28266	1.2829	-0.00024116	0.643981	0.74553	0.739269	0.885069	0.499328	GSM1479703	DNASE:DNase ZT 10 WT / Liver, WT, ZT 10, DNase / .
1001	1.7216	1.63028	0.0913121	0.638374	0.634776	0.00359839	0.644341	0.74553	0.191272	0.494898	0.499326	ENCFF164OJX	CHIP:H3K9ac:C57BL/6 liver embryo (16.5 days)
311	2.00537	1.91191	0.0934577	0.730802	0.727788	0.00301391	0.644889	0.745639	0.914506	0.964399	0.499323	ENCFF666XCJ	CHIP:H3K4me1:C57BL/6 thymus male adult (8 weeks)
1198	1.63404	1.67856	-0.0445166	0.717085	0.720953	-0.00386828	0.645455	0.745768	0.738856	0.885069	0.499321	GSM1659700	CHIP:.:HDAC3_liver_reverbalphaKO_betaKD_ZT10 / liver / .
383	1.30412	1.28216	0.021958	0.668033	0.667665	0.000368893	0.646652	0.746626	0.488058	0.76067	0.499315	ENCFF476YTS	CHIP:H3K27me3:C57BL/6 thymus male adult (8 weeks)
1031	1.97234	1.85189	0.120449	0.683865	0.679686	0.00417858	0.649707	0.749627	0.633549	0.843614	0.4993	ENCFF345KLB	CHIP:H3K9ac:C57BL/6 liver embryo (13.5 days)
701	1.11903	1.12005	-0.00102794	0.665688	0.668468	-0.00278002	0.65058	0.750107	0.936328	0.973662	0.499296	ENCFF492VCK	CHIP:H3K9me3:C57BL/6 lung embryo (14.5 days)
1023	0.780895	0.777998	0.00289732	0.531235	0.531924	-0.000689387	0.65135	0.750417	0.817817	0.927311	0.499292	ENCFF550PJQ	CHIP:H3K9me3:C57BL/6 liver embryo (15.5 days)
770	3.11974	2.99488	0.124861	0.783274	0.77975	0.00352424	0.651974	0.750417	0.717433	0.879058	0.499289	ENCFF671LRY	CHIP:H3K4me2:C57BL/6 heart embryo (12.5 days)
456	0.895879	0.891109	0.00477052	0.467053	0.466425	0.000628084	0.652219	0.750417	0.470783	0.752106	0.499287	ENCFF216JRQ	CHIP:SMC3:B10.H-2aH-4bp/Wts CH12.LX
359	3.05857	2.96215	0.096426	0.817011	0.817839	-0.000827551	0.653703	0.751599	0.671946	0.855631	0.49928	ENCFF966UOI	CHIP:H3K4me3:C57BL/6 brown adipose tissue male adult (24 weeks)
405	1.80155	1.78985	0.011692	0.868151	0.867139	0.00101191	0.654968	0.752526	0.361255	0.663918	0.499274	ENCFF277AAJ	CHIP:H3K9me3:CD-1 erythroblast embryo (14.5 days)
354	2.74377	2.63838	0.105394	0.773147	0.772975	0.000171304	0.656182	0.753395	0.510223	0.76908	0.499268	ENCFF414TDD	CHIP:H3K27ac:DBA/2 MEL cell line
830	0.835571	0.837544	-0.00197321	0.553555	0.556013	-0.00245833	0.658564	0.755551	0.731622	0.885069	0.499256	ENCFF517QXW	CHIP:H3K9me3:C57BL/6 kidney postnatal (0 days)
306	0.461891	0.45601	0.00588164	0.35056	0.348804	0.00175622	0.659244	0.755551	0.576256	0.805092	0.499253	ENCFF040HIS	CHIP:POLR2A:C57BL/6 ES-Bruce4
424	0.323923	0.324229	-0.000306636	0.271438	0.271726	-0.000288337	0.65944	0.755551	0.677615	0.859707	0.499252	ENCFF636WAD	CHIP:PAX5:B10.H-2aH-4bp/Wts CH12.LX
263	1.61759	1.60448	0.0131105	0.643304	0.645522	-0.00221884	0.66042	0.756146	0.931611	0.97245	0.499247	ENCFF247PFV	CHIP:TCF12:C3H myocyte originated from C2C12
448	0.908392	0.887593	0.0207985	0.461787	0.461973	-0.000186324	0.661078	0.756373	0.549919	0.788409	0.499244	ENCFF659WQU	CHIP:SIN3A:B10.H-2aH-4bp/Wts CH12.LX
1191	4.26072	4.3657	-0.104984	1.18405	1.18722	-0.0031693	0.663324	0.758414	0.864439	0.947064	0.499232	GSM1659690	CHIP:.:Rev-erbalpha_DBD_mutant_liver_ZT10_rep1 / liver / .
1194	1.34821	1.38207	-0.0338676	0.647831	0.650356	-0.00252444	0.666554	0.761578	0.860177	0.945964	0.499216	GSM1659694	CHIP:.:RORgamma_liver_ZT22 / liver / .
337	2.00808	1.94443	0.0636494	0.753885	0.755465	-0.0015806	0.670059	0.76505	0.966185	0.990475	0.499199	ENCFF850QFU	CHIP:H3K4me1:C57BL/6 liver embryo (14.5 days)
450	1.32037	1.3101	0.0102743	0.570343	0.573322	-0.00297892	0.6714	0.765784	0.618052	0.834159	0.499192	ENCFF165JVA	CHIP:ETS1:B10.H-2aH-4bp/Wts CH12.LX
1220	1.55079	1.60991	-0.0591222	0.80624	0.810832	-0.00459164	0.671754	0.765784	0.853719	0.943532	0.49919	GSM2390564	CHIP:.:ChIP-seq Rpc4 , ZT18, rep1, Arntl KO / Liver / .
1049	1.24487	1.22791	0.0169593	0.571591	0.572723	-0.00113177	0.672358	0.765784	0.792218	0.913564	0.499187	ENCFF177GZH	CHIP:TCF12:B10.H-2aH-4bp/Wts CH12.LX
929	0.860368	0.862224	-0.00185621	0.561784	0.56415	-0.00236553	0.672566	0.765784	0.963173	0.989677	0.499186	ENCFF363IUI	CHIP:H3K9me3:C57BL/6 intestine postnatal (0 days)
479	0.49526	0.494194	0.00106624	0.357512	0.360462	-0.00295043	0.673478	0.766292	0.649522	0.846326	0.499181	ENCFF104SUM	CHIP:GABPA:DBA/2 MEL cell line
1144	4.41596	4.55924	-0.14328	1.17168	1.17558	-0.00390041	0.674161	0.766538	0.870973	0.94766	0.499178	GSM1446066	CHIP:GR:ChIP-seq, Liver_GR_WT_6pm / Liver tissue / .
87	0.294771	0.28574	0.00903085	0.178495	0.176344	0.00215143	0.675814	0.76659	0.335017	0.64153	0.49917	ENCFF514HPX	DNASE:C57BL/6 MN1 treated with 10 nM methyltrienolone
1239	2.22653	2.2161	0.0104322	0.852333	0.854037	-0.0017038	0.675826	0.76659	0.891387	0.953723	0.49917	GSM647035	CHIP:.:H3K9ac at ZT10 / Liver / .
300	0.728876	0.739072	-0.0101958	0.418655	0.420375	-0.00171989	0.676066	0.76659	0.31882	0.622918	0.499168	ENCFF538KBR	CHIP:CTCF:C57BL/6 lung male adult (8 weeks)
7	0.33	0.326743	0.00325662	0.212119	0.210266	0.00185263	0.676074	0.76659	0.499825	0.765484	0.499168	ENCFF443PWY	DNASE:CD-1 c-Kit-positive CD71-negative TER-119-negative erythroid progenitor cells male embryo (14.5 days)
1262	0.0467385	0.0473864	-0.000647828	0.0443729	0.0448316	-0.000458665	0.678028	0.768091	0.919909	0.96607	0.499158	GSM873425	CHIP:CHOP:Chop -/- Tm ChIP-seq / Mouse embronic fibroblast / Mouse embryonic fibroblast
1103	0.832428	0.799679	0.032749	0.445826	0.445136	0.000690311	0.678495	0.768091	0.714127	0.878906	0.499156	ENCFF650BRL	CHIP:NRF1:B10.H-2aH-4bp/Wts CH12.LX
637	0.822213	0.82502	-0.00280756	0.549846	0.553266	-0.00341928	0.6788	0.768091	0.636812	0.845394	0.499154	ENCFF705MSQ	CHIP:H3K9me3:C57BL/6 neural tube embryo (14.5 days)
339	0.874871	0.861261	0.0136108	0.547437	0.545235	0.00220191	0.682482	0.77119	0.332621	0.63843	0.499136	ENCFF820TWT	CHIP:POLR2A:C57BL/6 small intestine male adult (8 weeks)
278	2.06719	2.04229	0.0248995	0.911818	0.90974	0.00207824	0.682784	0.77119	0.219224	0.529685	0.499134	ENCFF815CFZ	CHIP:H3K4me1:C57BL/6 cortical plate male adult (8 weeks)
97	4.73773	4.84699	-0.109257	1.16811	1.16976	-0.00164926	0.682947	0.77119	0.596051	0.819508	0.499133	GSM1479705	DNASE:DNase ZT 18 WT / Liver, WT, ZT 18, DNase / .
204	0.153906	0.151343	0.00256236	0.133049	0.130994	0.00205474	0.683638	0.771441	0.102515	0.360668	0.49913	UW29.1	ATAC:Ex_neurons_SCPN-clusters_29-cluster_1
481	0.429496	0.424948	0.00454816	0.31524	0.318216	-0.00297639	0.684455	0.771604	0.746542	0.887531	0.499126	ENCFF013LGH	CHIP:KAT2A:DBA/2 MEL cell line
512	1.23069	1.23294	-0.00224662	0.706589	0.71002	-0.0034312	0.684874	0.771604	0.836692	0.931989	0.499123	ENCFF409BJZ	CHIP:H3K9me3:C57BL/6 heart embryo (14.5 days)
728	1.02146	1.02144	1.94311e-05	0.626257	0.62905	-0.00279301	0.685489	0.771604	0.834976	0.931989	0.49912	ENCFF040LFN	CHIP:H3K9me3:C57BL/6 liver postnatal (0 days)
1195	1.40981	1.45653	-0.0467165	0.639432	0.642401	-0.00296813	0.685661	0.771604	0.921672	0.96607	0.499119	GSM1659695	CHIP:.:HDAC3_liver_reverbGFP_ZT10_rep1 / liver / .
1141	4.28605	4.40141	-0.115361	1.20559	1.20826	-0.00266516	0.686529	0.772052	0.829351	0.931323	0.499115	GSM1446063	CHIP:GR:ChIP-seq, Liver_GR_GRdim_6pm / Liver tissue / .
380	1.46138	1.44557	0.0158046	0.757673	0.760207	-0.00253326	0.687194	0.772271	0.65103	0.847577	0.499112	ENCFF857TIJ	CHIP:H3K9me3:C57BL/6 ES-Bruce4
385	2.34432	2.29485	0.0494711	0.828401	0.830363	-0.00196177	0.687825	0.772451	0.943038	0.977546	0.499108	ENCFF122GDX	CHIP:H3K4me2:B10.H-2aH-4bp/Wts CH12.LX
720	1.10584	1.10571	0.000133157	0.659473	0.662227	-0.00275451	0.688552	0.77274	0.800942	0.916618	0.499105	ENCFF033IOU	CHIP:H3K9me3:C57BL/6 limb embryo (14.5 days)
101	1.01656	0.9916	0.0249612	0.594764	0.594442	0.000321746	0.693466	0.777724	0.867999	0.947256	0.499079	ENCFF745RFR	ATAC:C57BL/6 hindbrain embryo (11.5 days)
168	0.259061	0.261564	-0.00250238	0.171233	0.172529	-0.00129585	0.696134	0.780183	0.723692	0.880761	0.499065	UW17.2	ATAC:Alveolar_macrophages-clusters_17-cluster_2
1184	5.75776	6.04639	-0.288635	1.34404	1.34887	-0.00482702	0.697136	0.780773	0.723142	0.880743	0.49906	GSM1631170	CHIP:CEBPb:ChIP-seq, Liver_CEBPb_WT_pred_6am / Liver tissue / .
209	0.202044	0.199165	0.00287898	0.145238	0.144513	0.00072585	0.701102	0.784681	0.878284	0.948294	0.499039	UW30.4	ATAC:Unknown-clusters_30-cluster_4
454	0.997083	0.975691	0.0213913	0.499531	0.498544	0.000986546	0.701772	0.784896	0.339864	0.644056	0.499036	ENCFF724BKJ	CHIP:MXI1:B10.H-2aH-4bp/Wts CH12.LX
378	1.19776	1.1901	0.00766051	0.683796	0.686045	-0.00224882	0.702891	0.785612	0.609077	0.829779	0.49903	ENCFF655NSX	CHIP:H3K27me3:C57BL/6 splenic B cell male adult (8 weeks)
258	1.31098	1.29998	0.0110065	0.570107	0.571718	-0.00161165	0.705319	0.78779	0.625797	0.83865	0.499017	ENCFF779WLW	CHIP:MYOD1:C3H myocyte originated from C2C12
303	0.567886	0.547345	0.0205412	0.365486	0.364013	0.00147319	0.706018	0.788036	0.498913	0.765484	0.499013	ENCFF376VCU	CHIP:POLR2A:C57BL/6 spleen male adult (8 weeks)
292	0.888167	0.902547	-0.0143808	0.44904	0.450202	-0.0011622	0.708981	0.790805	0.645295	0.846135	0.498998	ENCFF164ZFD	CHIP:CTCF:C57BL/6 kidney male adult (8 weeks)
99	4.58579	4.66814	-0.0823479	1.17433	1.17614	-0.00181496	0.711777	0.79274	0.343249	0.647739	0.498983	GSM1479707	DNASE:DNase ZT 26 WT / Liver, WT, ZT 26, DNase / .
401	2.22268	2.21927	0.00341129	0.963439	0.966918	-0.0034793	0.711891	0.79274	0.801692	0.916618	0.498982	ENCFF797MYD	CHIP:H3K9me3:129 G1E-ER4 treated with 10 nM 17B-estradiol for 24 hours
1248	0.742457	0.775499	-0.0330423	0.407792	0.411201	-0.00340819	0.712163	0.79274	0.749544	0.890135	0.498981	GSM864672	CHIP:.:PPARalpha ChIP LXRdKO Control / C57BL/6 LXRdKO mouse liver / .
127	1.20973	1.21866	-0.00893414	0.590565	0.592795	-0.00223023	0.71347	0.793657	0.73426	0.885069	0.498974	ENCFF770CQD	ATAC:C57BL/6 liver postnatal (0 days)
1117	0.394134	0.392913	0.0012207	0.328026	0.327222	0.000803918	0.715078	0.794908	0.556062	0.793283	0.498965	GSM1176711	CHIP:SREBP1:SREBP1 (ZT10) / SREBP1_ZT10, liver cells / .
96	4.91027	5.01379	-0.103519	1.19833	1.20072	-0.00239158	0.715813	0.795187	0.441332	0.735404	0.498961	GSM1479704	DNASE:DNase ZT 14 WT / Liver, WT, ZT 14, DNase / .
430	0.764909	0.784582	-0.019673	0.384913	0.385116	-0.000202924	0.719127	0.798129	0.832026	0.931847	0.498943	ENCFF816XFR	CHIP:CTCF:129 G1E-ER4 treated with 10 nM 17B-estradiol for 24 hours
1254	0.479455	0.498796	-0.0193408	0.287575	0.289606	-0.00203085	0.719433	0.798129	0.594082	0.819104	0.498942	GSM864678	CHIP:.:RXR ChIP LXRdKO T0901317 / C57BL/6 LXRdKO mouse liver / .
489	0.419578	0.41791	0.00166798	0.317789	0.319216	-0.00142738	0.722015	0.800453	0.557942	0.793679	0.498928	ENCFF141IPU	CHIP:USF2:DBA/2 MEL cell line
140	1.14842	1.12747	0.0209552	0.595518	0.596719	-0.0012005	0.726206	0.804556	0.737713	0.885069	0.498905	ENCFF258MGU	ATAC:C57BL/6 intestine embryo (16.5 days)
149	0.220415	0.216892	0.00352286	0.154755	0.153685	0.00106978	0.727133	0.80504	0.81977	0.927968	0.4989	UW11.3	ATAC:Proximal_tubule-clusters_11-cluster_3
1136	2.71526	2.75214	-0.0368843	0.928145	0.928258	-0.000113249	0.728263	0.805749	0.296535	0.614384	0.498894	GSM1301671	CHIP:BMAL1:ZT8 BMAL1 ChIP Seq-1 / Liver / .
501	0.586428	0.573216	0.0132117	0.37035	0.370492	-0.000141859	0.731941	0.809272	0.595309	0.819173	0.498873	ENCFF060EGQ	CHIP:NELFE:DBA/2 MEL cell line
100	15.4318	15.5163	-0.0845003	2.09811	2.10297	-0.00486255	0.733863	0.810852	0.471039	0.752106	0.498863	GSM1479708	DNASE:DNase ZT 6 Bmal1 KO / Liver, Bmal1 KO, ZT 6, DNase / .
1183	4.67118	4.9206	-0.249416	1.19243	1.19793	-0.0054965	0.735544	0.812066	0.620642	0.835832	0.498853	GSM1631168	CHIP:CEBPb:ChIP-seq, Liver_CEBPb_WT_6am / Liver tissue / .
1232	1.33924	1.36752	-0.0282785	0.657756	0.661143	-0.00338608	0.736243	0.812066	0.793923	0.914167	0.49885	GSM647025	CHIP:.:HDAC3 ChIP at ZT22-1 / Liver / .
1202	4.14413	4.23025	-0.0861206	1.15415	1.15613	-0.00197124	0.736444	0.812066	0.176776	0.48007	0.498848	GSM2218849	CHIP:Rev-erba:Rev-erba ChIP-seq at ZT10 (HNF6 KO) Replicate 1 / liver / .
384	1.74807	1.74542	0.00264621	0.762399	0.762966	-0.00056684	0.738723	0.814032	0.57536	0.8047	0.498836	ENCFF819RQI	CHIP:H3K4me1:B10.H-2aH-4bp/Wts CH12.LX
381	2.05832	2.03779	0.0205283	0.921342	0.922825	-0.00148249	0.74339	0.818105	0.519185	0.773384	0.498809	ENCFF576XZZ	CHIP:H3K27me3:C57BL/6 spleen male adult (8 weeks)
1247	0.857048	0.897961	-0.040913	0.436825	0.4404	-0.00357544	0.743415	0.818105	0.583165	0.810609	0.498809	GSM864671	CHIP:.:PPARalpha ChIP WT Control / C57BL/6 wild type mouse liver / .
440	0.533793	0.535018	-0.00122452	0.351806	0.353476	-0.0016692	0.744714	0.818986	0.519198	0.773384	0.498802	ENCFF429LKF	CHIP:ZC3H11A:B10.H-2aH-4bp/Wts CH12.LX
124	0.91016	0.894468	0.0156925	0.568229	0.568315	-8.66055e-05	0.746922	0.820865	0.40079	0.700262	0.498789	ENCFF329SPM	ATAC:C57BL/6 cerebellum adult
98	4.49436	4.58289	-0.0885243	1.13012	1.13099	-0.000873208	0.747908	0.821158	0.364949	0.665771	0.498784	GSM1479706	DNASE:DNase ZT 22 WT / Liver, WT, ZT 22, DNase / .
462	0.813898	0.821527	-0.00762916	0.379342	0.379384	-4.24683e-05	0.748188	0.821158	0.933534	0.973662	0.498782	ENCFF025UEN	CHIP:CTCF:B10.H-2aH-4bp/Wts CH12.LX
1137	1.72892	1.75264	-0.023721	0.833133	0.835069	-0.00193608	0.751068	0.823398	0.740699	0.885069	0.498766	GSM1301673	CHIP:CRY1:ZT20 CRY1 ChIP Seq / Liver / .
504	0.678968	0.665749	0.0132191	0.414021	0.41625	-0.00222862	0.751231	0.823398	0.63321	0.843614	0.498765	ENCFF368ANL	CHIP:MAX:DBA/2 MEL cell line
165	0.156063	0.157318	-0.00125477	0.116447	0.117519	-0.00107218	0.753994	0.825572	0.49342	0.761211	0.498749	UW16.2	ATAC:Macrophages-clusters_16-cluster_2
234	1.93156	1.86994	0.0616267	0.66309	0.664855	-0.00176591	0.754239	0.825572	0.147525	0.43147	0.498747	ENCFF583MBD	CHIP:H3K4me3:DBA/2 MEL cell line
203	0.124407	0.119948	0.00445898	0.0969356	0.0954453	0.00149032	0.754723	0.825572	0.511966	0.770001	0.498745	UW28.2	ATAC:Immature_B_cells-clusters_28-cluster_2
1134	1.74883	1.82747	-0.0786382	0.715822	0.720476	-0.00465387	0.757512	0.828072	0.439297	0.734247	0.498728	GSM1236495	CHIP:SMRT:SMRT ChIPSeq 5AM (ZT22) / liver / .
156	0.151542	0.14437	0.00717218	0.115401	0.114542	0.000859082	0.758633	0.828746	0.466651	0.748738	0.498722	UW12.5	ATAC:T_cells-clusters_12-cluster_5
1133	1.6254	1.69762	-0.0722237	0.692967	0.697902	-0.00493455	0.760319	0.830036	0.645059	0.846135	0.498712	GSM1236494	CHIP:SMRT:SMRT ChIPSeq 5PM (ZT10) / liver / .
363	1.00588	1.01887	-0.0129873	0.535911	0.538129	-0.00221753	0.762302	0.830734	0.693536	0.868506	0.4987	ENCFF771PZS	CHIP:CTCF:DBA/2 MEL cell line
435	3.68913	3.5904	0.098737	1.12613	1.12973	-0.00359416	0.762392	0.830734	0.75452	0.893329	0.4987	ENCFF469EMZ	CHIP:H3K4me1:129 G1E-ER4 treated with 10 nM 17B-estradiol for 24 hours
474	0.514769	0.513434	0.00133508	0.349813	0.352424	-0.00261092	0.762686	0.830734	0.511056	0.769629	0.498698	ENCFF417EAD	CHIP:ZC3H11A:DBA/2 MEL cell line
465	0.977358	0.979713	-0.00235558	0.480668	0.484326	-0.00365713	0.762981	0.830734	0.65319	0.84812	0.498696	ENCFF111ZPI	CHIP:TBP:B10.H-2aH-4bp/Wts CH12.LX
453	0.628991	0.617656	0.0113354	0.376864	0.377221	-0.000356615	0.763961	0.831162	0.385429	0.682392	0.498691	ENCFF775LKP	CHIP:NELFE:B10.H-2aH-4bp/Wts CH12.LX
988	0.781372	0.784117	-0.00274456	0.526358	0.529665	-0.0033074	0.764386	0.831162	0.658547	0.848965	0.498688	ENCFF368BVK	CHIP:H3K9me3:C57BL/6 lung embryo (15.5 days)
488	0.738961	0.748249	-0.00928867	0.379524	0.384037	-0.00451323	0.764983	0.831261	0.491377	0.76067	0.498685	ENCFF056UBA	CHIP:CTCF:DBA/2 MEL cell line treated with 2% dimethyl sulfoxide for 5 days
3	0.379948	0.367141	0.0128073	0.206051	0.204622	0.00142854	0.769788	0.83593	0.662826	0.8508	0.498656	ENCFF798VSP	DNASE:C57BL/6 splenic B cell male adult (8 weeks)
257	0.749063	0.763301	-0.0142381	0.418667	0.420523	-0.00185639	0.771907	0.837678	0.605162	0.826502	0.498643	ENCFF462ONT	CHIP:MYOD1:C3H C2C12
996	2.76036	2.78087	-0.0205164	0.807545	0.806503	0.00104266	0.776221	0.841398	0.280669	0.600442	0.498617	ENCFF889KFS	CHIP:H3K4me3:C57BL/6 heart embryo (10.5 days)
136	1.40356	1.37827	0.0252935	0.716349	0.715311	0.00103754	0.776404	0.841398	0.119996	0.389242	0.498616	ENCFF878HWK	ATAC:C57BL/6 frontal cortex adult
548	0.945771	0.952986	-0.00721431	0.612928	0.617875	-0.0049476	0.776872	0.841398	0.51237	0.770001	0.498613	ENCFF887HCS	CHIP:H3K9me3:C57BL/6 midbrain postnatal (0 days)
1189	3.17247	3.26825	-0.0957751	1.02601	1.03064	-0.00463378	0.777729	0.841615	0.647524	0.846135	0.498608	GSM1659686	CHIP:.:Rev-erbalpha_WT_liver_ZT10_rep1 / liver / .
458	1.14566	1.14834	-0.00267744	0.553517	0.557922	-0.00440425	0.778172	0.841615	0.544501	0.783295	0.498605	ENCFF140YUU	CHIP:EP300:B10.H-2aH-4bp/Wts CH12.LX
361	3.78142	3.89115	-0.109733	1.11178	1.11772	-0.00593889	0.778609	0.841615	0.444414	0.736061	0.498602	ENCFF167PJA	CHIP:H3K4me1:C57BL/6 bone marrow macrophage male adult (8 weeks)
344	1.49829	1.46875	0.0295417	0.739402	0.740534	-0.00113189	0.780845	0.84267	0.738177	0.885069	0.498589	ENCFF042INO	CHIP:H3K79me2:C57BL/6 heart male adult (8 weeks)
1235	1.36988	1.42289	-0.0530112	0.607051	0.611304	-0.00425297	0.78111	0.84267	0.41555	0.71436	0.498587	GSM647029	CHIP:.:Rev-erba ChIP at ZT10 / Liver / .
747	0.921633	0.928409	-0.00677657	0.597489	0.602771	-0.00528163	0.781124	0.84267	0.233529	0.545786	0.498587	ENCFF919CSS	CHIP:H3K9me3:C57BL/6 hindbrain postnatal (0 days)
455	0.783424	0.77165	0.0117748	0.456658	0.457077	-0.00041917	0.78535	0.846491	0.64585	0.846135	0.498561	ENCFF174LRE	CHIP:CHD2:B10.H-2aH-4bp/Wts CH12.LX
496	1.20808	1.18157	0.0265063	0.576759	0.582294	-0.00553489	0.785696	0.846491	0.574436	0.8047	0.498559	ENCFF266YOT	CHIP:EP300:DBA/2 MEL cell line
213	0.20164	0.194472	0.0071682	0.140666	0.140146	0.000519678	0.786242	0.846524	0.487355	0.76067	0.498555	UW4.4	ATAC:Activated_B_cells-clusters_4-cluster_4
1253	0.469915	0.488973	-0.0190584	0.283207	0.285023	-0.00181568	0.788209	0.84739	0.483922	0.76067	0.498543	GSM864677	CHIP:.:RXR ChIP LXRdKO Control / C57BL/6 LXRdKO mouse liver / .
526	0.735333	0.729233	0.00609982	0.447163	0.451954	-0.00479153	0.788501	0.84739	0.372696	0.671901	0.498541	ENCFF507ODK	CHIP:ELF1:DBA/2 MEL cell line
966	1.37058	1.37053	4.75645e-05	0.613555	0.618893	-0.00533766	0.788973	0.84739	0.779406	0.907129	0.498538	ENCFF113RHY	CHIP:IRF4:B10.H-2aH-4bp/Wts CH12.LX
1022	3.09997	2.99743	0.102549	0.783161	0.777966	0.00519437	0.789281	0.84739	0.535184	0.78008	0.498536	ENCFF736SAK	CHIP:H3K4me2:C57BL/6 kidney embryo (16.5 days)
495	0.594319	0.5864	0.00791901	0.406396	0.408411	-0.00201434	0.789625	0.84739	0.598974	0.822151	0.498534	ENCFF623ITO	CHIP:CHD2:DBA/2 MEL cell line
500	0.64133	0.64249	-0.00115997	0.348612	0.35052	-0.00190753	0.791093	0.847913	0.524598	0.77585	0.498525	ENCFF527GUY	CHIP:RAD21:DBA/2 MEL cell line treated with 2% dimethyl sulfoxide for 5 days
1148	6.12798	6.41652	-0.288538	1.35544	1.36198	-0.00654829	0.791145	0.847913	0.637108	0.845394	0.498524	GSM1446070	CHIP:CEBPb:ChIP-seq, Liver_CEBPb_WT_6pm / Liver tissue / .
483	0.539462	0.536328	0.00313336	0.382455	0.38496	-0.00250572	0.792994	0.849342	0.528	0.777753	0.498513	ENCFF585YOH	CHIP:ZKSCAN1:DBA/2 MEL cell line
170	0.166671	0.162362	0.00430864	0.118339	0.116895	0.00144379	0.794292	0.850177	0.240739	0.556307	0.498504	UW17.4	ATAC:Collisions-clusters_17-cluster_4
592	0.967162	0.962818	0.00434357	0.60812	0.609546	-0.0014261	0.796027	0.851369	0.632351	0.843614	0.498493	ENCFF716TGN	CHIP:H3K9me3:C57BL/6 liver embryo (14.5 days)
327	2.68901	2.4976	0.191405	0.768968	0.768183	0.000784039	0.796442	0.851369	0.61011	0.830498	0.49849	ENCFF470WIY	CHIP:H3K27ac:C57BL/6 spleen male adult (8 weeks)
1233	1.87091	1.95289	-0.0819825	0.734435	0.740189	-0.00575483	0.802488	0.85698	0.574563	0.8047	0.498451	GSM647027	CHIP:.:NCoR ChIP at ZT10 / Liver / .
1251	0.729943	0.765433	-0.0354902	0.375862	0.378643	-0.0027808	0.802734	0.85698	0.238223	0.553607	0.49845	GSM864675	CHIP:.:RXR ChIP WT T0901317 / C57BL/6 wild type mouse liver / .
463	1.02089	0.99971	0.0211766	0.515365	0.517959	-0.00259411	0.803518	0.85726	0.697101	0.869933	0.498444	ENCFF562UOS	CHIP:MYC:B10.H-2aH-4bp/Wts CH12.LX
276	1.22247	1.22031	0.00215662	0.607596	0.609874	-0.00227779	0.80426	0.857495	0.442114	0.735442	0.49844	ENCFF518BJU	CHIP:H3K4me1:C57BL/6 bone marrow male adult (8 weeks)
482	0.861329	0.840759	0.0205702	0.499652	0.50289	-0.00323814	0.806937	0.859791	0.308873	0.620284	0.498422	ENCFF498FCD	CHIP:CHD1:DBA/2 MEL cell line
982	0.738494	0.727551	0.0109429	0.4298	0.433147	-0.00334704	0.808773	0.861189	0.255565	0.575195	0.49841	ENCFF251ZXL	CHIP:EP300:C57BL/6 liver postnatal (0 days)
110	1.27776	1.29588	-0.018115	0.598013	0.600935	-0.00292253	0.809463	0.861365	0.557234	0.793679	0.498405	ENCFF517RIA	ATAC:C57BL/6 megakaryocyte progenitor cell male adult (5-6 weeks)
233	1.93722	1.91871	0.0185152	0.796754	0.802745	-0.0059908	0.815707	0.867448	0.645439	0.846135	0.498363	ENCFF070ZCF	CHIP:H3K4me1:DBA/2 MEL cell line
139	1.09162	1.07476	0.0168673	0.583682	0.586143	-0.00246102	0.81992	0.871313	0.620082	0.835762	0.498334	ENCFF114TFO	ATAC:C57BL/6 intestine embryo (15.5 days)
559	0.90524	0.908978	-0.00373775	0.580214	0.584148	-0.00393385	0.820402	0.871313	0.449006	0.737443	0.49833	ENCFF921YZN	CHIP:H3K9me3:C57BL/6 heart embryo (15.5 days)
293	0.669143	0.657526	0.0116165	0.46473	0.463097	0.00163302	0.822173	0.872524	0.151586	0.439632	0.498318	ENCFF916PLK	CHIP:POLR2A:C57BL/6 kidney male adult (8 weeks)
1085	1.16463	1.17109	-0.00645828	0.684196	0.689408	-0.0052126	0.822989	0.872524	0.531865	0.778886	0.498312	ENCFF046SEF	CHIP:H3K9me3:C57BL/6 heart postnatal (0 days)
1190	2.34246	2.43858	-0.0961237	0.79856	0.803855	-0.0052942	0.823135	0.872524	0.268343	0.587851	0.498311	GSM1659688	CHIP:.:Rev-erbalpha_129mice_WT_liver_ZT10_rep1 / liver / .
646	0.693067	0.695906	-0.00283855	0.487537	0.49076	-0.00322247	0.824225	0.872725	0.826573	0.929541	0.498304	ENCFF399KQJ	CHIP:H3K9me3:C57BL/6 lung postnatal (0 days)
1228	0.428093	0.425923	0.00217044	0.336801	0.336856	-5.45382e-05	0.824387	0.872725	0.621777	0.836674	0.498302	GSM3212796	CHIP:Bmal1:Bmal1_ZT4 control rep1 / gastrocnemius / .
570	0.94106	0.947114	-0.0060544	0.607032	0.611898	-0.00486571	0.826295	0.874181	0.524556	0.77585	0.498289	ENCFF114FKU	CHIP:H3K9me3:C57BL/6 forebrain postnatal (0 days)
425	0.318523	0.311696	0.0068264	0.254302	0.254557	-0.000255108	0.833502	0.881238	0.215384	0.526667	0.498237	ENCFF779AOL	CHIP:GATA1:CD-1 erythroblast embryo (14.5 days)
1047	1.78413	1.65626	0.127874	0.648117	0.647492	0.000625968	0.835942	0.883249	0.555705	0.793283	0.498219	ENCFF753BLB	CHIP:H3K9ac:C57BL/6 liver embryo (14.5 days)
452	1.43189	1.39818	0.0337046	0.598929	0.599414	-0.000484407	0.837405	0.884227	0.467139	0.74879	0.498208	ENCFF668KLU	CHIP:BHLHE40:B10.H-2aH-4bp/Wts CH12.LX
464	0.761145	0.769936	-0.00879008	0.439795	0.444858	-0.00506315	0.83967	0.886049	0.600786	0.822576	0.498192	ENCFF944MUS	CHIP:JUN:B10.H-2aH-4bp/Wts CH12.LX
948	0.810622	0.784333	0.0262893	0.455908	0.457811	-0.00190359	0.840395	0.886245	0.318133	0.622918	0.498186	ENCFF377WET	CHIP:USF1:DBA/2 MEL cell line
1005	1.18514	1.17705	0.00808966	0.566725	0.570399	-0.00367409	0.842441	0.887833	0.533593	0.779207	0.498171	ENCFF199YQB	CHIP:MEF2A:B10.H-2aH-4bp/Wts CH12.LX
492	0.708816	0.709068	-0.00025183	0.421089	0.423487	-0.00239858	0.843992	0.888897	0.205147	0.509919	0.498159	ENCFF034BBD	CHIP:SMC3:DBA/2 MEL cell line
1201	4.90349	5.03532	-0.13183	1.20264	1.20594	-0.00329769	0.849684	0.894319	0.104212	0.361418	0.498115	GSM2218846	CHIP:Rev-erba:Rev-erba ChIP-seq at ZT10 (Wild Type) Replicate 1 / liver / .
449	0.661469	0.662534	-0.0010646	0.407585	0.411862	-0.00427642	0.8512	0.89534	0.600616	0.822576	0.498103	ENCFF210EXT	CHIP:RCOR1:B10.H-2aH-4bp/Wts CH12.LX
1242	1.04564	1.08501	-0.0393641	0.538196	0.539201	-0.00100487	0.851947	0.895553	0.295063	0.613517	0.498097	GSM840528	CHIP:REV-ERB:REV-ERB alpha / liver_REV-ERB alpha_ChIP / .
438	1.18106	1.19239	-0.0113271	0.620809	0.62862	-0.00781131	0.854051	0.897037	0.451639	0.739087	0.498081	ENCFF365FLT	CHIP:ZNF384:B10.H-2aH-4bp/Wts CH12.LX
130	0.992928	0.966838	0.0260897	0.569028	0.569458	-0.000429451	0.85518	0.897037	0.384096	0.681501	0.498072	ENCFF331KWS	ATAC:C57BL/6 liver embryo (11.5 days)
437	3.0664	2.96992	0.0964842	0.99563	0.997991	-0.002361	0.855979	0.897037	0.440283	0.734676	0.498065	ENCFF289VIM	CHIP:H3K4me1:129 G1E
145	0.0682863	0.0676205	0.000665776	0.0602943	0.0603325	-3.82662e-05	0.856815	0.897037	0.180873	0.485578	0.498059	UW1.3	ATAC:Unknown-clusters_1-cluster_3
467	0.780711	0.788658	-0.00794727	0.4533	0.458873	-0.00557306	0.8574	0.897037	0.313784	0.621141	0.498054	ENCFF544VSI	CHIP:JUND:B10.H-2aH-4bp/Wts CH12.LX
404	1.70812	1.70553	0.00259268	0.811201	0.813821	-0.00262034	0.857574	0.897037	0.176411	0.479874	0.498053	ENCFF140MAG	CHIP:H3K9me3:129 G1E
443	0.893709	0.887416	0.00629354	0.480473	0.482732	-0.00225973	0.857903	0.897037	0.27515	0.596401	0.49805	ENCFF283POK	CHIP:MAZ:B10.H-2aH-4bp/Wts CH12.LX
288	1.8196	1.77687	0.0427258	0.726918	0.728288	-0.00137037	0.858155	0.897037	0.310885	0.620284	0.498048	ENCFF202RFR	CHIP:H3K4me1:C57BL/6 spleen male adult (8 weeks)
480	0.787701	0.77592	0.0117805	0.466373	0.470369	-0.00399575	0.858273	0.897037	0.536725	0.78008	0.498047	ENCFF591TEI	CHIP:MAZ:DBA/2 MEL cell line
62	0.362823	0.365693	-0.00287044	0.220918	0.222933	-0.00201459	0.864598	0.903073	0.26332	0.58051	0.497995	ENCFF963PGF	DNASE:DBA/2 MEL cell line treated with 125 uM zinc dichloride for 24 hours
191	0.292501	0.288753	0.00374857	0.184141	0.184346	-0.000205025	0.872599	0.910503	0.158294	0.451523	0.497926	UW24.1	ATAC:Monocytes-clusters_24-cluster_1
599	0.660695	0.630884	0.0298116	0.386665	0.388653	-0.00198862	0.87282	0.910503	0.0881789	0.33001	0.497924	ENCFF623PQH	CHIP:NRF1:DBA/2 MEL cell line
1199	3.0344	3.08235	-0.0479515	1.05732	1.06381	-0.00648713	0.875331	0.912336	0.201211	0.50704	0.497902	GSM1659701	CHIP:.:HDAC3_KO_liver_ZT10_rep1 / liver / .
353	2.88941	2.78806	0.101342	0.803147	0.80331	-0.000162184	0.875879	0.912336	0.205842	0.510875	0.497897	ENCFF603CPU	CHIP:H3K9ac:DBA/2 MEL cell line
1250	0.482042	0.503415	-0.0213735	0.287947	0.290704	-0.00275695	0.876242	0.912336	0.216262	0.526667	0.497894	GSM864674	CHIP:.:RXR ChIP WT Control / C57BL/6 wild type mouse liver / .
502	1.14657	1.14328	0.00328779	0.572767	0.580663	-0.00789648	0.877179	0.912733	0.505535	0.767806	0.497886	ENCFF325EHX	CHIP:EP300:DBA/2 MEL cell line
441	0.975092	0.95094	0.024152	0.492402	0.495523	-0.00312167	0.881318	0.916459	0.258824	0.577729	0.497848	ENCFF781WYP	CHIP:HCFC1:B10.H-2aH-4bp/Wts CH12.LX
104	0.864722	0.854538	0.010184	0.503007	0.505877	-0.00287038	0.882711	0.916652	0.312218	0.620284	0.497836	ENCFF769BOR	ATAC:C57BL/6 intestine postnatal (0 days)
30	0.325964	0.309868	0.0160961	0.174006	0.173509	0.000496656	0.883806	0.916652	0.196565	0.50206	0.497825	ENCFF178FCM	DNASE:DBA/2 erythroblast originated from MEL-GATA-1-ER treated with 1 uM estradiol for 48 hours
103	0.864361	0.863549	0.000812411	0.522599	0.529308	-0.00670904	0.883976	0.916652	0.146635	0.43147	0.497824	ENCFF700IKY	ATAC:C57BL/6 megakaryocyte-erythroid progenitor cell male adult (5-6 weeks)
475	0.9981	0.96636	0.0317408	0.521984	0.523935	-0.00195134	0.884463	0.916652	0.348611	0.651613	0.497819	ENCFF707FPY	CHIP:HCFC1:DBA/2 MEL cell line
126	0.814629	0.809526	0.00510269	0.494781	0.497011	-0.00223035	0.884707	0.916652	0.204846	0.509919	0.497817	ENCFF238AZB	ATAC:C57BL/6 stomach postnatal (0 days)
432	0.46129	0.472275	-0.0109842	0.300476	0.304095	-0.00361934	0.885173	0.916652	0.256345	0.576163	0.497813	ENCFF844EOO	CHIP:CTCF:B10.H-2aH-4bp/Wts CH12.LX
238	1.85999	1.8429	0.0170875	0.788182	0.797099	-0.00891721	0.885489	0.916652	0.073802	0.295917	0.49781	ENCFF335VHL	CHIP:H3K4me1:DBA/2 MEL cell line treated with 2% dimethyl sulfoxide for 5 days
29	0.299875	0.29119	0.00868496	0.176648	0.176599	4.97252e-05	0.886158	0.916652	0.317133	0.622918	0.497803	ENCFF516XER	DNASE:DBA/2 erythroblast originated from MEL-GATA-1-ER treated with 1 uM estradiol for 24 hours
418	0.687043	0.656222	0.030821	0.358106	0.362579	-0.00447387	0.886569	0.916652	0.564854	0.797984	0.497799	ENCFF302RFZ	CHIP:TAL1:DBA/2 MEL cell line
499	0.673089	0.675946	-0.00285727	0.375923	0.379096	-0.0031735	0.887082	0.916652	0.145258	0.430791	0.497795	ENCFF198FKD	CHIP:RAD21:DBA/2 MEL cell line
1097	0.652058	0.634975	0.0170836	0.391941	0.391573	0.000368714	0.88943	0.9185	0.391996	0.692527	0.497772	ENCFF193AYX	CHIP:USF1:B10.H-2aH-4bp/Wts CH12.LX
497	0.818149	0.824976	-0.00682718	0.404511	0.408795	-0.0042837	0.891233	0.919783	0.444352	0.736061	0.497755	ENCFF515BPN	CHIP:CTCF:DBA/2 MEL cell line
459	0.557202	0.54455	0.0126514	0.357578	0.358021	-0.00044319	0.893618	0.921298	0.357064	0.65695	0.497731	ENCFF495UJH	CHIP:USF2:B10.H-2aH-4bp/Wts CH12.LX
192	0.214245	0.211289	0.00295596	0.153678	0.15339	0.000287652	0.893822	0.921298	0.302197	0.620284	0.497729	UW24.2	ATAC:Monocytes-clusters_24-cluster_2
431	0.43229	0.441984	-0.00969413	0.306525	0.307381	-0.000855774	0.894803	0.921321	0.239439	0.554864	0.497719	ENCFF938UFC	CHIP:CTCF:129 G1E
123	1.18828	1.21053	-0.0222456	0.577732	0.582261	-0.0045284	0.894965	0.921321	0.121061	0.389242	0.497718	ENCFF047WUY	ATAC:C57BL/6 megakaryocyte male adult (5-6 weeks)
93	2.17863	2.23033	-0.0517039	0.820169	0.824905	-0.00473565	0.89677	0.9226	0.120753	0.389242	0.497699	GSM1479701	DNASE:DNase ZT 2 WT / Liver, WT, ZT 2, DNase / .
505	0.391109	0.393316	-0.00220728	0.3001	0.304917	-0.00481758	0.89812	0.923063	0.191887	0.495707	0.497686	ENCFF240ORP	CHIP:E2F4:DBA/2 MEL cell line
146	0.0717305	0.0702891	0.00144139	0.0664306	0.0658563	0.000574239	0.899468	0.923063	0.118121	0.389242	0.497672	UW10.1	ATAC:Hematopoietic_progenitors-clusters_10-cluster_1
239	1.76396	1.70935	0.0546108	0.634807	0.637949	-0.00314224	0.899699	0.923063	0.0883097	0.33001	0.497669	ENCFF206DMH	CHIP:H3K4me3:DBA/2 MEL cell line treated with 2% dimethyl sulfoxide for 5 days
256	0.842275	0.832022	0.0102534	0.450026	0.450763	-0.000737488	0.899856	0.923063	0.140499	0.425119	0.497668	ENCFF170WKG	CHIP:USF1:C3H myocyte originated from C2C12
240	0.437714	0.431168	0.0065456	0.338035	0.338272	-0.000237644	0.900028	0.923063	0.273827	0.595102	0.497666	ENCFF393FAV	CHIP:H3K9me3:DBA/2 MEL cell line treated with 2% dimethyl sulfoxide for 5 days
28	0.299576	0.293956	0.00562006	0.176725	0.177451	-0.000726089	0.901329	0.92382	0.246026	0.561418	0.497653	ENCFF223QRV	DNASE:DBA/2 MEL-GATA-1-ER
368	0.86458	0.874582	-0.0100018	0.536321	0.542845	-0.0065245	0.90392	0.925571	0.113767	0.383818	0.497625	ENCFF614WMD	CHIP:H3K27me3:C57BL/6 cerebellum male adult (8 weeks)
121	0.802874	0.816358	-0.0134842	0.456448	0.460942	-0.00449377	0.904164	0.925571	0.254521	0.574421	0.497622	ENCFF564GWQ	ATAC:C57BL/6 hematopoietic stem cell
291	0.903767	0.910705	-0.00693882	0.463242	0.465981	-0.00273854	0.906381	0.927263	0.369213	0.669203	0.497599	ENCFF639AFA	CHIP:CTCF:C57BL/6 heart male adult (8 weeks)
472	1.23705	1.24146	-0.00440705	0.658795	0.668006	-0.00921154	0.909744	0.930124	0.218215	0.528802	0.497561	ENCFF807HIG	CHIP:ZNF384:DBA/2 MEL cell line
111	1.24751	1.28036	-0.0328451	0.592127	0.596474	-0.00434726	0.911915	0.931764	0.147426	0.43147	0.497537	ENCFF408OOS	ATAC:C57BL/6 granulocyte monocyte progenitor cell male adult (5-6 weeks)
442	0.46317	0.462322	0.000847727	0.327979	0.330511	-0.0025318	0.912625	0.93191	0.166558	0.463821	0.497529	ENCFF985RMX	CHIP:GABPA:B10.H-2aH-4bp/Wts CH12.LX
64	0.299175	0.298553	0.000621796	0.181632	0.182877	-0.00124483	0.913255	0.931973	0.339612	0.644056	0.497522	ENCFF155MQS	DNASE:DBA/2 MEL cell line
476	0.53235	0.521109	0.0112414	0.3504	0.354168	-0.00376791	0.916569	0.934775	0.0819553	0.313876	0.497483	ENCFF252OTG	CHIP:BHLHE40:DBA/2 MEL cell line
114	0.914105	0.897206	0.0168991	0.531133	0.533238	-0.00210553	0.918269	0.935928	0.31332	0.620971	0.497462	ENCFF643SRL	ATAC:C57BL/6 liver embryo (12.5 days)
1264	0.866932	0.882803	-0.0158705	0.502261	0.506731	-0.00447029	0.92015	0.937264	0.18394	0.487644	0.49744	GSM873427	CHIP:ATF4:Atf4-/ Tm ChIP-seq / Mouse embronic fibroblast / Mouse embryonic fibroblast
510	1.62706	1.59607	0.0309941	0.666867	0.676717	-0.0098502	0.930197	0.946166	0.311979	0.620284	0.49731	ENCFF160HQN	CHIP:GATA1:DBA/2 MEL cell line
461	0.846635	0.826331	0.0203042	0.458378	0.458946	-0.000567496	0.930516	0.946166	0.139466	0.423771	0.497306	ENCFF291HYO	CHIP:MAX:B10.H-2aH-4bp/Wts CH12.LX
447	0.684605	0.683664	0.000940919	0.408973	0.410805	-0.00183177	0.930617	0.946166	0.400406	0.700262	0.497304	ENCFF950EEV	CHIP:UBTF:B10.H-2aH-4bp/Wts CH12.LX
736	0.988271	0.96328	0.0249906	0.514465	0.520897	-0.00643212	0.932199	0.947188	0.0740243	0.295917	0.497282	ENCFF894YTN	CHIP:TCF12:DBA/2 MEL cell line
478	0.629492	0.627799	0.0016923	0.392509	0.397406	-0.00489706	0.935249	0.9497	0.227612	0.541197	0.497239	ENCFF790OHZ	CHIP:UBTF:DBA/2 MEL cell line
507	0.905434	0.89158	0.013854	0.507707	0.512257	-0.00455016	0.937234	0.951128	0.197469	0.50206	0.49721	ENCFF998KIS	CHIP:MYC:DBA/2 MEL cell line
486	1.16539	1.14542	0.0199757	0.549847	0.556623	-0.0067752	0.940304	0.953654	0.131701	0.409166	0.497164	ENCFF760BIB	CHIP:ETS1:DBA/2 MEL cell line
444	0.464393	0.460576	0.0038166	0.32034	0.322834	-0.00249425	0.941451	0.954165	0.312937	0.620961	0.497146	ENCFF835AUM	CHIP:KAT2A:B10.H-2aH-4bp/Wts CH12.LX
508	1.01145	1.02035	-0.00890064	0.514472	0.521221	-0.00674897	0.942227	0.954165	0.118931	0.389242	0.497134	ENCFF026AMD	CHIP:TBP:DBA/2 MEL cell line
460	0.93042	0.931749	-0.00132823	0.447051	0.448972	-0.00192145	0.94255	0.954165	0.203282	0.50836	0.497129	ENCFF388SYO	CHIP:RAD21:B10.H-2aH-4bp/Wts CH12.LX
691	1.03003	1.03085	-0.000813246	0.512944	0.518654	-0.00571066	0.944493	0.955543	0.122378	0.391182	0.497098	ENCFF600CWP	CHIP:ELF1:B10.H-2aH-4bp/Wts CH12.LX
113	0.957733	0.939138	0.0185947	0.535194	0.538622	-0.00342804	0.945129	0.955598	0.119583	0.389242	0.497088	ENCFF731NRD	ATAC:C57BL/6 G1E
138	1.1023	1.12093	-0.0186229	0.550249	0.55584	-0.00559169	0.946578	0.95589	0.143975	0.430791	0.497064	ENCFF705VCO	ATAC:C57BL/6 common myeloid progenitor male adult (5-6 weeks)
491	0.552654	0.545119	0.0075348	0.376843	0.380927	-0.00408378	0.946581	0.95589	0.233266	0.545786	0.497064	ENCFF516ABO	CHIP:MAFK:DBA/2 MEL cell line
494	0.986791	0.962938	0.0238529	0.509031	0.511369	-0.00233859	0.953169	0.961952	0.125921	0.400945	0.496947	ENCFF780AWC	CHIP:MXI1:DBA/2 MEL cell line
451	0.569957	0.561494	0.00846237	0.35937	0.363398	-0.00402737	0.959059	0.966727	0.183067	0.487644	0.496832	ENCFF727IMP	CHIP:MAFK:B10.H-2aH-4bp/Wts CH12.LX
487	1.16846	1.14151	0.0269575	0.568433	0.57284	-0.00440669	0.959078	0.966727	0.0254053	0.155377	0.496831	ENCFF297ZST	CHIP:SIN3A:DBA/2 MEL cell line
355	2.4769	2.46101	0.0158927	0.88731	0.897029	-0.00971907	0.959927	0.96699	0.0658644	0.277475	0.496814	ENCFF488XKH	CHIP:H3K4me1:DBA/2 MEL cell line
108	0.672645	0.676535	-0.00388968	0.450712	0.456464	-0.00575203	0.96244	0.968927	0.117514	0.389242	0.496759	ENCFF570DUW	ATAC:C57BL/6 erythroid progenitor cell male adult (5-6 weeks)
477	1.02875	1.01999	0.00875664	0.54583	0.553725	-0.00789595	0.964321	0.970226	0.276048	0.596771	0.496716	ENCFF525ZGM	CHIP:RCOR1:DBA/2 MEL cell line
506	0.525878	0.529035	-0.00315702	0.365742	0.37154	-0.00579748	0.966069	0.97139	0.144872	0.430791	0.496675	ENCFF673UJE	CHIP:JUND:DBA/2 MEL cell line
351	3.19942	3.14534	0.0540774	1.03603	1.04648	-0.0104506	0.966856	0.971587	0.153982	0.443846	0.496656	ENCFF207HCQ	CHIP:H3K36me3:DBA/2 MEL cell line
1104	0.463301	0.451638	0.0116631	0.311786	0.316066	-0.00428048	0.969168	0.973314	0.163851	0.460971	0.496597	ENCFF549QHQ	CHIP:EP300:C57BL/6 liver embryo (14.5 days)
26	0.378662	0.375041	0.00362116	0.225405	0.226625	-0.00121939	0.971096	0.974655	0.120182	0.389242	0.496545	ENCFF990ATO	DNASE:DBA/2 MEL cell line
485	0.654208	0.639551	0.0146565	0.39478	0.40064	-0.00585985	0.974884	0.97786	0.111554	0.378225	0.496435	ENCFF283VEC	CHIP:GATA1:DBA/2 MEL cell line treated with 2% dimethyl sulfoxide for 5 days
167	0.205832	0.206095	-0.000262707	0.138127	0.139273	-0.00114642	0.976957	0.979342	0.0406556	0.204273	0.496368	UW17.1	ATAC:Dendritic_cells-clusters_17-cluster_1
235	0.492264	0.489009	0.00325474	0.367484	0.369977	-0.00249273	0.979954	0.981747	0.132201	0.409166	0.496262	ENCFF089WYW	CHIP:H3K9me3:DBA/2 MEL cell line
406	1.48785	1.49277	-0.00492036	0.778656	0.78786	-0.00920409	0.981608	0.982804	0.0160165	0.118569	0.496198	ENCFF662VCX	CHIP:H3K9me3:B10.H-2aH-4bp/Wts CH12.LX
446	0.584001	0.58534	-0.00133818	0.386541	0.390567	-0.00402695	0.98815	0.988752	0.0162684	0.118569	0.495881	ENCFF411YYG	CHIP:ZKSCAN1:B10.H-2aH-4bp/Wts CH12.LX
131	0.814319	0.830627	-0.0163079	0.525034	0.537085	-0.0120507	0.999667	0.999667	0.00317412	0.0515606	0.493802	ENCFF321OJD	ATAC:C57BL/6 erythroblast male adult (5-6 weeks)

## Sheet: An human
	pro_mean	sib_mean	diff_mean	pro_geo	sib_geo	diff_geo	mw_p	mw_q	ks_p	ks_q	auroc	target_id	target_labels
4721	1.10169	1.0049	0.0967945	0.394141	0.378118	0.0160225	0.000107677	0.219477	0.000367899	0.417249	0.506738	CNhs10728	CAGE:extraskeletal myxoid chondrosarcoma cell line:H-EMC-SS
4988	0.85323	0.767044	0.0861858	0.338908	0.325283	0.0136246	0.000239762	0.219477	0.00288307	0.417249	0.506359	CNhs11818	CAGE:neuroblastoma cell line:NBsusSR
4798	0.84634	0.788976	0.057364	0.352356	0.339191	0.0131643	0.000296068	0.219477	0.0109705	0.434972	0.506255	CNhs11384	CAGE:Neural stem cells,
4861	1.04311	0.944959	0.0981472	0.384511	0.371939	0.0125716	0.000311298	0.219477	0.00299503	0.417249	0.50623	CNhs11285	CAGE:small cell lung carcinoma cell line:LK-2
4691	1.48531	1.37662	0.10869	0.457407	0.437223	0.0201841	0.000600485	0.219477	0.012838	0.438585	0.505897	CNhs10629	CAGE:skeletal muscle, adult, pool1
5309	0.38442	0.345527	0.0388927	0.166957	0.159681	0.00727591	0.000610549	0.219477	0.000383639	0.417249	0.505889	CNhs14240	CAGE:squamous cell lung carcinoma cell line:RERF-LC-AI
4825	0.964956	0.870119	0.0948367	0.386243	0.373116	0.0131268	0.000753715	0.219477	0.00160108	0.417249	0.505778	CNhs11244	CAGE:synovial sarcoma cell line:HS-SY-II
4874	0.61018	0.57423	0.0359509	0.225946	0.21382	0.0121268	0.000817162	0.219477	0.00411192	0.417249	0.505735	CNhs11322	CAGE:Fibroblast - Lymphatic,
5151	0.942585	0.871341	0.0712441	0.360894	0.346111	0.0147832	0.000897317	0.219477	0.0123264	0.4366	0.505685	CNhs12610	CAGE:diencephalon, adult
5055	2.05814	1.89034	0.167807	0.564535	0.544008	0.0205272	0.000898897	0.219477	0.00335309	0.417249	0.505685	CNhs11910	CAGE:Smooth Muscle Cells - Prostate,
3877	0.960829	0.91402	0.0468089	0.487538	0.477388	0.0101505	0.00106341	0.219477	0.00168563	0.417249	0.505594	ENCFF308TCO	CHIP:RNF2:H1-hESC
5079	1.57452	1.42165	0.152869	0.468014	0.447622	0.0203919	0.00115514	0.219477	0.0084419	0.417249	0.505549	CNhs12086	CAGE:Renal Glomerular Endothelial Cells,
4780	1.40312	1.29337	0.109748	0.422278	0.403928	0.0183501	0.00118847	0.219477	0.00220072	0.417249	0.505533	CNhs10876	CAGE:Anulus Pulposus Cell,
4870	1.5028	1.39468	0.108126	0.436112	0.416648	0.0194647	0.00119089	0.219477	0.00379859	0.417249	0.505532	CNhs11317	CAGE:Pericytes,
5131	0.399686	0.366961	0.0327244	0.167519	0.159437	0.00808187	0.0012432	0.219477	0.00463309	0.417249	0.505508	CNhs12493	CAGE:Fibroblast - Periodontal Ligament, (PL29)
4854	0.968156	0.882733	0.0854225	0.341269	0.327986	0.0132823	0.00124578	0.219477	0.00224001	0.417249	0.505507	CNhs11277	CAGE:large cell lung carcinoma cell line:IA-LM
4817	1.19491	1.10272	0.0921901	0.375298	0.3593	0.0159983	0.00124997	0.219477	0.000886676	0.417249	0.505505	CNhs11089	CAGE:Smooth Muscle Cells - Pulmonary Artery,
580	0.299247	0.282282	0.0169651	0.18937	0.182734	0.00663583	0.00127347	0.219477	0.00657969	0.417249	0.505495	ENCFF643ARA	DNASE:brain female embryo (105 days)
4976	0.281202	0.255722	0.0254792	0.149153	0.139948	0.00920495	0.0012758	0.219477	0.0136817	0.438585	0.505494	CNhs11792	CAGE:breast, adult,
5002	0.570935	0.525321	0.0456135	0.233148	0.222931	0.010217	0.0012796	0.219477	0.00870436	0.417249	0.505492	CNhs11835	CAGE:osteoclastoma cell line:Hs 706.T
5150	0.824646	0.746305	0.0783404	0.294897	0.282995	0.0119021	0.0013058	0.219477	0.0105816	0.432573	0.505481	CNhs12596	CAGE:Iris Pigment Epithelial Cells,
5060	0.708948	0.658743	0.0502048	0.27085	0.259001	0.0118493	0.00136553	0.219477	0.00292741	0.417249	0.505456	CNhs11932	CAGE:basal cell carcinoma cell line:TE 354.T
5153	1.55927	1.42884	0.130423	0.466091	0.447871	0.0182198	0.00140933	0.219477	0.0171935	0.478089	0.505439	CNhs12641	CAGE:tenocyte,
4808	1.42905	1.31363	0.115423	0.422869	0.406092	0.0167775	0.00146183	0.219477	0.00188597	0.417249	0.505418	CNhs11385	CAGE:Osteoblast,
4773	2.10293	1.91624	0.186686	0.586377	0.566259	0.0201175	0.00151401	0.219477	0.0055445	0.417249	0.505399	CNhs10868	CAGE:Smooth Muscle Cells - Colonic,
4776	2.84518	2.59524	0.249942	0.756895	0.736113	0.0207815	0.00153727	0.219477	0.0115957	0.4366	0.50539	CNhs11966	CAGE:Ciliary Epithelial Cells,
4694	1.88882	1.73516	0.15366	0.618664	0.599615	0.0190489	0.00155672	0.219477	0.031698	0.593363	0.505383	CNhs10632	CAGE:testis, adult, pool1
4917	0.596143	0.548181	0.0479621	0.245802	0.235959	0.00984274	0.00162352	0.219477	0.0116119	0.4366	0.50536	CNhs11718	CAGE:mesenchymal stem cell line:Hu5/E18
4795	1.76832	1.62254	0.14578	0.505089	0.484032	0.0210563	0.00170678	0.219477	0.00192074	0.417249	0.505331	CNhs11054	CAGE:Adipocyte - omental,
4768	1.47684	1.35765	0.119184	0.452487	0.434866	0.0176212	0.00173241	0.219477	0.00665673	0.417249	0.505323	CNhs11900	CAGE:Smooth Muscle Cells - Brain Vascular,
319	0.33343	0.31539	0.0180398	0.204092	0.197693	0.00639839	0.00173888	0.219477	0.00589624	0.417249	0.505321	ENCFF536FNG	DNASE:brain female embryo (117 days)
4919	0.365454	0.343866	0.0215883	0.16276	0.154678	0.00808157	0.00178482	0.219477	0.00689548	0.417249	0.505306	CNhs11723	CAGE:leiomyoma cell line:15242A
5020	1.01423	0.924464	0.0897657	0.349221	0.33479	0.0144313	0.00186278	0.219477	0.013976	0.438585	0.505282	CNhs11857	CAGE:spindle cell sarcoma cell line:Hs 132.T
4894	1.36147	1.25588	0.105592	0.430149	0.411036	0.0191132	0.00187091	0.219477	0.00143811	0.417249	0.505279	CNhs12730	CAGE:Mesenchymal Stem Cells - hepatic,
4907	2.43039	2.23354	0.196852	0.62316	0.602358	0.0208013	0.00198696	0.219477	0.0155823	0.459195	0.505245	CNhs11909	CAGE:Fibroblast - Cardiac,
4794	1.46355	1.35698	0.106573	0.440095	0.422794	0.0173016	0.00198963	0.219477	0.00783414	0.417249	0.505244	CNhs11052	CAGE:Preadipocyte - breast,
4872	2.04838	1.85257	0.195815	0.541613	0.522087	0.0195264	0.00200703	0.219477	0.0102262	0.432573	0.505239	CNhs12080	CAGE:Meningeal Cells,
4781	1.49765	1.36672	0.130933	0.463324	0.446456	0.0168688	0.00201098	0.219477	0.0102291	0.432573	0.505238	CNhs10877	CAGE:Pancreatic stromal cells,
5123	2.49627	2.29574	0.200536	0.632874	0.614127	0.0187472	0.00204079	0.219477	0.0306406	0.589831	0.505229	CNhs12369	CAGE:mesenchymal precursor cell - cardiac,
4813	1.91088	1.75401	0.156867	0.53263	0.511105	0.0215244	0.00204425	0.219477	0.00183664	0.417249	0.505228	CNhs11984	CAGE:Skeletal muscle cells differentiated into Myotubes - multinucleated,
5005	0.639868	0.57806	0.0618077	0.254275	0.244379	0.0098962	0.00205245	0.219477	0.00802325	0.417249	0.505226	CNhs11838	CAGE:alveolar cell carcinoma cell line:SW 1573
4974	0.377558	0.345175	0.0323831	0.17845	0.168471	0.0099797	0.00209743	0.219477	0.0200924	0.501415	0.505214	CNhs11789	CAGE:left ventricle, adult,
4889	1.30996	1.20658	0.103384	0.415236	0.397143	0.0180928	0.00219091	0.219477	0.000305339	0.417249	0.505188	CNhs12734	CAGE:Fibroblast - Conjunctival,
5024	0.987403	0.883387	0.104016	0.345711	0.332213	0.0134985	0.0022486	0.219477	0.00459243	0.417249	0.505173	CNhs11861	CAGE:medulloblastoma cell line:ONS-76
4892	1.06966	0.981459	0.0881971	0.338189	0.323322	0.0148666	0.00225968	0.219477	0.000608161	0.417249	0.50517	CNhs11343	CAGE:Fibroblast - Villous Mesenchymal,
4774	2.75444	2.5042	0.250243	0.713897	0.694546	0.019351	0.00231839	0.219477	0.0336198	0.596108	0.505156	CNhs12008	CAGE:Skeletal Muscle Satellite Cells,
4814	1.95004	1.80221	0.14783	0.531531	0.513206	0.018325	0.00233765	0.219477	0.00299789	0.417249	0.505151	CNhs11086	CAGE:Smooth Muscle Cells - Brachiocephalic,
5056	1.08379	1.00022	0.0835689	0.352213	0.337479	0.0147345	0.00237036	0.219477	0.0107624	0.432573	0.505143	CNhs11927	CAGE:Smooth Muscle Cells - Uterine,
4793	1.90951	1.75096	0.158552	0.540577	0.519276	0.0213009	0.00239875	0.219477	0.00596609	0.417249	0.505136	CNhs11969	CAGE:Adipocyte - breast,
5004	0.565076	0.516048	0.0490275	0.226575	0.21694	0.00963542	0.00241332	0.219477	0.00619286	0.417249	0.505132	CNhs11837	CAGE:transitional cell carcinoma cell line:Hs 769.T
5057	0.668083	0.61307	0.0550124	0.250219	0.23712	0.0130991	0.00243222	0.219477	0.0122669	0.4366	0.505128	CNhs11978	CAGE:Endothelial Cells - Thoracic,
4975	0.362589	0.330597	0.0319924	0.179525	0.16947	0.0100558	0.0024774	0.219477	0.0383946	0.614246	0.505117	CNhs11790	CAGE:left atrium, adult,
4827	1.0699	0.97298	0.0969208	0.400446	0.387974	0.0124724	0.00251483	0.219477	0.000600254	0.417249	0.505108	CNhs11249	CAGE:endometrial stromal sarcoma cell line:OMC-9
5308	0.330315	0.297693	0.0326218	0.15058	0.143923	0.00665693	0.00254834	0.219477	0.000337091	0.417249	0.5051	CNhs14239	CAGE:epithelioid sarcoma cell line:HS-ES-2R
4860	0.995346	0.892939	0.102407	0.361281	0.346293	0.014988	0.00255531	0.219477	0.00493103	0.417249	0.505099	CNhs11284	CAGE:neuroblastoma cell line:NB-1
5077	0.32451	0.295465	0.0290441	0.155094	0.14585	0.0092444	0.00258103	0.219477	0.00741232	0.417249	0.505093	CNhs12069	CAGE:Adipocyte - perirenal,
5069	0.919855	0.843861	0.0759947	0.326548	0.312006	0.0145421	0.00262733	0.219477	0.019433	0.49878	0.505082	CNhs11952	CAGE:Fibroblast - Gingival, (GFH3)
4763	1.61965	1.50054	0.119105	0.501662	0.488794	0.0128673	0.00264143	0.219477	0.0450663	0.6542	0.505079	CNhs11904	CAGE:CD14+ monocyte derived endothelial progenitor cells,
5050	1.18557	1.05613	0.12944	0.420855	0.406936	0.0139194	0.00270066	0.219477	0.0365736	0.606545	0.505066	CNhs11892	CAGE:Wilms' tumor cell line:G-401
4869	1.6377	1.50358	0.134115	0.462155	0.442848	0.0193067	0.00271381	0.219477	0.00193393	0.417249	0.505063	CNhs11344	CAGE:Mesenchymal Stem Cells - bone marrow,
4839	1.33338	1.19434	0.139047	0.456602	0.442249	0.0143533	0.0027604	0.219477	0.00515838	0.417249	0.505053	CNhs11261	CAGE:transitional-cell carcinoma cell line:JMSU1
4879	1.00601	0.924876	0.0811338	0.327433	0.312889	0.0145441	0.00278983	0.219477	0.00371833	0.417249	0.505047	CNhs12348	CAGE:Smooth Muscle Cells - Bronchial,
1441	2.9526	2.9761	-0.0235023	0.733522	0.717934	0.0155876	0.00281	0.219477	0.0647561	0.707664	0.505042	ENCFF555ZEF	CHIP:H3K4me3:SK-N-SH
4685	1.68233	1.53593	0.146398	0.538526	0.52003	0.0184962	0.00286561	0.219477	0.0180908	0.485114	0.505031	CNhs10622	CAGE:kidney, adult, pool1
4686	1.25184	1.12302	0.128815	0.409956	0.392343	0.0176133	0.00296538	0.219477	0.0270065	0.553997	0.50501	CNhs10624	CAGE:liver, adult, pool1
5236	2.61426	2.46088	0.153384	0.647391	0.636256	0.0111354	0.0029749	0.219477	0.0120241	0.4366	0.505009	CNhs13466	CAGE:CD14+ monocytes - treated with IFN + N-hexane,
5294	1.25141	1.14226	0.10915	0.398827	0.384483	0.0143448	0.00298742	0.219477	0.0266756	0.553623	0.505006	CNhs14130	CAGE:Fibroblast - Gingival, (aggressive periodontitis)
4810	1.85998	1.70015	0.159824	0.511549	0.492957	0.0185917	0.00301316	0.219477	0.00144737	0.417249	0.505001	CNhs11981	CAGE:Preadipocyte - subcutaneous,
5155	0.894612	0.806872	0.0877399	0.327912	0.315817	0.0120957	0.00317328	0.219477	0.0187919	0.489419	0.50497	CNhs12806	CAGE:large cell lung carcinoma cell line:NCI-H460
5016	0.723817	0.655438	0.0683798	0.281861	0.272144	0.00971755	0.00318095	0.219477	0.00833259	0.417249	0.504968	CNhs11852	CAGE:lymphangiectasia cell line:DS-1
4900	0.889588	0.813164	0.0764248	0.304289	0.29144	0.0128492	0.00319424	0.219477	0.00154562	0.417249	0.504966	CNhs11352	CAGE:Fibroblast - skin walker warburg,
5003	0.550157	0.505386	0.0447717	0.223969	0.213434	0.0105345	0.00326183	0.219477	0.0113604	0.4366	0.504953	CNhs11836	CAGE:Ewing's sarcoma cell line:Hs 863.T
4698	1.71968	1.58775	0.131926	0.583554	0.563517	0.0200362	0.00327373	0.219477	0.0294146	0.578814	0.504951	CNhs10636	CAGE:retina, adult, pool1
4752	0.461693	0.424938	0.0367547	0.191985	0.182783	0.0092015	0.00333827	0.219477	0.015724	0.459195	0.504939	CNhs10845	CAGE:Mesenchymal stem cells - hepatic,
4684	0.794082	0.729563	0.0645199	0.299412	0.284275	0.0151372	0.00335005	0.219477	0.0317175	0.593363	0.504937	CNhs10621	CAGE:heart, adult, pool1
5251	0.888058	0.793898	0.0941598	0.332845	0.322132	0.010713	0.00335657	0.219477	0.0101232	0.432573	0.504936	CNhs13504	CAGE:acute myeloid leukemia (FAB M4) cell line:HNT-34
499	0.375172	0.347601	0.0275713	0.217866	0.210106	0.00776024	0.00337398	0.219477	0.0209103	0.504984	0.504933	ENCFF361UTR	DNASE:brain male embryo (122 days)
4803	0.492757	0.45252	0.0402372	0.225231	0.218337	0.00689344	0.00339068	0.219477	0.0649194	0.707664	0.50493	CNhs11073	CAGE:Mast cell - stimulated,
4862	0.925241	0.837848	0.0873926	0.336792	0.324749	0.0120437	0.00342495	0.219477	0.00527336	0.417249	0.504924	CNhs11286	CAGE:gastric cancer cell line:AZ521
5052	0.677222	0.620584	0.0566382	0.275099	0.262872	0.0122266	0.00349667	0.219477	0.0572744	0.699537	0.504911	CNhs11894	CAGE:normal embryonic palatal mesenchymal cell line:HEPM
4772	1.78662	1.61722	0.1694	0.519033	0.502422	0.0166111	0.00366343	0.219477	0.0412884	0.641389	0.504883	CNhs11962	CAGE:Fibroblast - Periodontal Ligament,
5169	0.827974	0.751604	0.0763691	0.338572	0.322631	0.015941	0.00372887	0.219477	0.0474992	0.666168	0.504872	CNhs12848	CAGE:gall bladder, adult
5299	0.897676	0.818478	0.0791979	0.355595	0.344562	0.0110324	0.00373732	0.219477	0.00930532	0.427535	0.504871	CNhs14139	CAGE:thymic carcinoma cell line:Ty-82
5143	1.92072	1.79362	0.127096	0.561479	0.542943	0.0185354	0.00376455	0.219477	0.036787	0.606985	0.504866	CNhs12562	CAGE:mature adipocyte,
4822	2.00083	1.82486	0.17597	0.590912	0.574542	0.0163699	0.00376694	0.219477	0.00402061	0.417249	0.504866	CNhs11245	CAGE:schwannoma cell line:HS-PSS, tech_
5048	1.00165	0.892369	0.109278	0.36924	0.356405	0.012835	0.00377481	0.219477	0.0660213	0.707664	0.504865	CNhs11890	CAGE:teratocarcinoma cell line:PA-1
4866	0.69307	0.628299	0.0647711	0.278371	0.265714	0.0126575	0.00377894	0.219477	0.0154668	0.459195	0.504864	CNhs11290	CAGE:osteosarcoma cell line:HS-Os-1
4896	0.501522	0.469728	0.031794	0.190362	0.182584	0.00777848	0.00381418	0.219477	0.00658451	0.417249	0.504858	CNhs11348	CAGE:Fibroblast - Mammary,
5116	1.69271	1.55391	0.13881	0.491002	0.473371	0.0176308	0.00390242	0.219477	0.00817044	0.417249	0.504844	CNhs12342	CAGE:Lens Epithelial Cells,
5297	0.721996	0.662464	0.059532	0.276279	0.263826	0.0124535	0.00393592	0.219477	0.0214218	0.510377	0.504839	CNhs14135	CAGE:Fibroblast - Gingival, (periodontitis)
5068	0.83882	0.770861	0.0679593	0.312201	0.297751	0.01445	0.00401144	0.219477	0.00496677	0.417249	0.504828	CNhs11950	CAGE:normal intestinal epithelial cell line:FHs 74 Int
4920	0.718932	0.66705	0.0518817	0.269622	0.257384	0.0122385	0.00406749	0.219477	0.012711	0.438585	0.504819	CNhs11724	CAGE:leiomyoma cell line:15425
4381	2.62428	2.53131	0.0929713	0.828536	0.810887	0.0176486	0.00408378	0.219477	0.0672233	0.707664	0.504817	ENCFF366FNG	CHIP:H3K4me3:layer of hippocampus male adult (81 year)
4916	0.901548	0.825976	0.0755724	0.332804	0.320438	0.0123662	0.00408965	0.219477	0.0203295	0.501415	0.504816	CNhs11717	CAGE:oral squamous cell carcinoma cell line:HSC-3
4800	2.46983	2.29535	0.174479	0.633395	0.614362	0.0190334	0.00410675	0.219477	0.0383472	0.614246	0.504813	CNhs12013	CAGE:Preadipocyte - omental,
5119	0.685861	0.617922	0.067939	0.284215	0.274429	0.00978583	0.0042771	0.219477	0.0266002	0.553623	0.504788	CNhs12351	CAGE:testicular germ cell embryonal carcinoma cell line:NEC14
4871	1.16591	1.07695	0.0889663	0.373941	0.357966	0.0159749	0.00432617	0.219477	0.00392439	0.417249	0.504781	CNhs11319	CAGE:Fibroblast - Choroid Plexus,
4753	0.530432	0.479896	0.0505356	0.20571	0.196889	0.0088217	0.00434117	0.219477	0.0416006	0.641389	0.504779	CNhs10846	CAGE:Mesenchymal Stem Cells - Vertebral,
4956	0.657971	0.600765	0.0572066	0.271072	0.257154	0.0139179	0.00441662	0.219477	0.126235	0.81946	0.504768	CNhs11768	CAGE:tongue, fetal,
4786	2.54657	2.32313	0.223445	0.645088	0.624363	0.0207247	0.0045635	0.219477	0.0146566	0.451956	0.504748	CNhs10883	CAGE:Prostate Stromal Cells,
4748	0.477772	0.441461	0.0363103	0.189847	0.180841	0.00900605	0.00459546	0.219477	0.00696733	0.417249	0.504743	CNhs10839	CAGE:Smooth Muscle Cells - Umbilical artery,
1164	3.23231	3.20842	0.023886	0.72987	0.717119	0.0127513	0.00460096	0.219477	0.0597472	0.707664	0.504743	ENCFF256KXI	CHIP:H3K4me3:brain microvascular endothelial cell
5266	0.44717	0.413105	0.0340642	0.223872	0.214447	0.00942488	0.00471897	0.219477	0.065611	0.707664	0.504727	CNhs13801	CAGE:globus pallidus - adult,
4865	0.936068	0.861342	0.0747263	0.349386	0.337869	0.0115166	0.00477205	0.219477	0.0340244	0.597482	0.50472	CNhs11289	CAGE:cervical cancer cell line:ME-180
4200	5.56058	5.40644	0.154146	1.16154	1.14878	0.0127586	0.00479206	0.219477	0.0103162	0.432573	0.504717	ENCFF357DTZ	CHIP:H3K27ac:small intestine male embryo (108 days)
4778	2.29807	2.10607	0.191994	0.591303	0.572167	0.0191356	0.00480151	0.219477	0.0162617	0.464508	0.504716	CNhs11968	CAGE:Fibroblast - Aortic Adventitial,
4784	1.83293	1.69342	0.139506	0.515175	0.495292	0.0198832	0.00482859	0.219477	0.00423624	0.417249	0.504712	CNhs12019	CAGE:Nucleus Pulposus Cell,
4904	0.715596	0.661442	0.0541538	0.28382	0.270824	0.0129963	0.00485208	0.219477	0.0158164	0.459195	0.504709	CNhs11373	CAGE:Chondrocyte - re diff,
240	0.315821	0.298921	0.0169005	0.199031	0.192456	0.00657499	0.00489099	0.219477	0.0277255	0.562236	0.504704	ENCFF064KBT	DNASE:brain female embryo (96 days)
4704	1.99397	1.87821	0.115759	0.577335	0.557274	0.0200611	0.00495466	0.219477	0.0217589	0.511527	0.504696	CNhs10643	CAGE:occipital pole, adult, pool1
4901	2.13326	1.9778	0.155464	0.576429	0.556787	0.0196418	0.00496408	0.219477	0.00576522	0.417249	0.504695	CNhs11913	CAGE:Fibroblast - skin dystrophia myotonica,
4991	0.819471	0.745323	0.0741479	0.310211	0.298429	0.0117826	0.00497059	0.219477	0.0467054	0.665271	0.504694	CNhs11821	CAGE:myxofibrosarcoma cell line:NMFH-1
644	0.332955	0.314642	0.0183128	0.202631	0.195938	0.00669265	0.00506106	0.219477	0.0288507	0.574097	0.504683	ENCFF622PZI	DNASE:brain male embryo (104 days)
5145	1.71398	1.56117	0.152814	0.468229	0.450906	0.0173227	0.00509743	0.219477	0.0080933	0.417249	0.504678	CNhs13076	CAGE:Smooth Muscle Cells - Umbilical Vein,
4926	0.478407	0.444694	0.0337131	0.210205	0.202142	0.00806271	0.00511839	0.219477	0.01045	0.432573	0.504676	CNhs11732	CAGE:embryonic pancreas cell line:1C3D3
5148	1.74431	1.58482	0.159496	0.486826	0.467661	0.0191649	0.00513498	0.219477	0.00754885	0.417249	0.504674	CNhs12590	CAGE:Perineurial Cells,
4898	0.974005	0.901864	0.0721413	0.327694	0.313994	0.0137001	0.00514881	0.219477	0.00289155	0.417249	0.504672	CNhs11350	CAGE:Multipotent Cord Blood Unrestricted Somatic Stem Cells,
5177	1.05461	0.987931	0.0666807	0.437675	0.424754	0.0129212	0.00516746	0.219477	0.0820373	0.764134	0.50467	CNhs12856	CAGE:heart - pulmonic valve, adult
5045	0.873947	0.772886	0.101061	0.321232	0.30897	0.012262	0.00523029	0.219477	0.0219786	0.514415	0.504662	CNhs11886	CAGE:chronic myeloblastic leukemia (CML) cell line:KCL-22
14	0.240679	0.2358	0.00487912	0.187865	0.184668	0.00319661	0.00525843	0.219477	0.00120468	0.417249	0.504659	ENCFF536IEC	DNASE:GM12892
4880	1.5605	1.41213	0.148369	0.443276	0.424908	0.0183682	0.00526059	0.219477	0.00380034	0.417249	0.504658	CNhs12894	CAGE:Smooth Muscle Cells - Tracheal,
5144	3.30628	3.06573	0.24055	0.801614	0.784303	0.0173102	0.00526081	0.219477	0.0228276	0.520527	0.504658	CNhs12566	CAGE:Mast cell,
5072	1.39138	1.25957	0.131806	0.423578	0.404912	0.0186665	0.0053237	0.219477	0.0103989	0.432573	0.504651	CNhs11977	CAGE:Endothelial Cells - Artery,
5017	0.286405	0.259574	0.0268317	0.141206	0.133854	0.00735241	0.00542927	0.219477	0.00240566	0.417249	0.504638	CNhs11853	CAGE:neuroepithelioma cell line:SK-N-MC
5122	1.46544	1.357	0.10844	0.446335	0.429694	0.0166415	0.00544242	0.219477	0.00614765	0.417249	0.504637	CNhs13098	CAGE:mesenchymal precursor cell - bone marrow,
5162	0.88313	0.817859	0.0652708	0.345487	0.33124	0.0142472	0.00546095	0.219477	0.0507364	0.675595	0.504635	CNhs12840	CAGE:cerebral meninges, adult
4782	1.13449	1.02318	0.111307	0.361284	0.346357	0.0149274	0.00547192	0.219477	0.00541883	0.417249	0.504633	CNhs10878	CAGE:Fibroblast - Pulmonary Artery,
4811	2.39894	2.18223	0.216714	0.609766	0.590217	0.0195485	0.00547619	0.219477	0.0335784	0.596108	0.504633	CNhs11982	CAGE:Preadipocyte - visceral,
4777	2.18293	1.96955	0.213381	0.622743	0.604352	0.0183914	0.00548902	0.219477	0.0384988	0.614246	0.504631	CNhs12010	CAGE:Endothelial Cells - Umbilical vein,
5300	1.09018	0.978127	0.112055	0.372121	0.358122	0.0139985	0.00555784	0.219477	0.00297728	0.417249	0.504623	CNhs14140	CAGE:thyroid carcinoma cell line:KHM-5M
4771	2.25764	2.06005	0.197587	0.608937	0.589662	0.0192748	0.0056034	0.219477	0.0531681	0.687298	0.504618	CNhs12006	CAGE:Fibroblast - Gingival,
5181	0.904974	0.836453	0.0685208	0.413097	0.400386	0.0127115	0.00560361	0.219477	0.0687548	0.709309	0.504618	CNhs12998	CAGE:testis, adult, pool2
5298	0.890236	0.809773	0.0804632	0.346452	0.335924	0.0105281	0.00561001	0.219477	0.0135426	0.438585	0.504617	CNhs14138	CAGE:bronchioalveolar carcinoma cell line:NCI-H650
4959	0.292444	0.268561	0.0238834	0.160035	0.151062	0.00897309	0.0056765	0.219477	0.0171849	0.478089	0.50461	CNhs11771	CAGE:stomach, fetal,
1167	3.63802	3.57146	0.0665591	0.77876	0.765225	0.0135354	0.00583101	0.219477	0.0297596	0.580037	0.504593	ENCFF419MUF	CHIP:H3K4me3:cardiac fibroblast female
5124	2.04915	1.89172	0.157428	0.566124	0.549723	0.0164008	0.00583864	0.219477	0.0191161	0.495434	0.504592	CNhs13094	CAGE:mesenchymal precursor cell - ovarian cancer left ovary,
5291	0.386495	0.360713	0.0257819	0.192327	0.183738	0.00858919	0.00584051	0.219477	0.116459	0.804884	0.504592	CNhs14082	CAGE:globus pallidus, newborn,
5295	3.07236	2.80985	0.262514	0.749289	0.729089	0.0201998	0.00588801	0.219477	0.0135112	0.438585	0.504587	CNhs14131	CAGE:Fibroblast - Gingival, (control)
5034	0.675441	0.61544	0.0600006	0.272705	0.2623	0.0104041	0.00591211	0.219477	0.0328535	0.596108	0.504584	CNhs11873	CAGE:mucinous cystadenocarcinoma cell line:MCAS
4927	0.468908	0.434962	0.0339462	0.204841	0.197145	0.00769605	0.00604442	0.219477	0.018444	0.485114	0.50457	CNhs11733	CAGE:embryonic pancreas cell line:1C3IKEI
5121	1.55635	1.42275	0.133602	0.455848	0.43809	0.0177576	0.00605182	0.219477	0.00187288	0.417249	0.504569	CNhs12364	CAGE:mesenchymal precursor cell - adipose,
4943	0.745713	0.679103	0.0666096	0.296127	0.285814	0.0103129	0.00606327	0.219477	0.0276411	0.562236	0.504568	CNhs11752	CAGE:mucinous adenocarcinoma cell line:JHOM-1
4678	1.16177	1.06253	0.0992389	0.404651	0.38696	0.0176903	0.0061666	0.219477	0.048899	0.671299	0.504557	CNhs10615	CAGE:adipose tissue, adult, pool1
4864	0.985766	0.886366	0.0994001	0.346359	0.333413	0.0129465	0.00626224	0.219477	0.0340743	0.597482	0.504547	CNhs11288	CAGE:cervical cancer cell line:D98-AH2
5067	0.942789	0.858128	0.0846612	0.358127	0.347304	0.0108236	0.00627197	0.219477	0.0321438	0.595343	0.504546	CNhs11949	CAGE:Whole blood (ribopure), , donation3
5256	1.64203	1.50559	0.136446	0.486428	0.471351	0.0150774	0.00632036	0.219477	0.0110528	0.434989	0.504541	CNhs13551	CAGE:Mallassez-derived cells,
4897	0.960548	0.886843	0.0737057	0.325273	0.310612	0.0146607	0.0063319	0.219477	0.000916616	0.417249	0.50454	CNhs11349	CAGE:Mesenchymal Stem Cells - amniotic membrane,
5310	0.21881	0.199548	0.0192629	0.112205	0.107419	0.00478607	0.00635963	0.219477	0.00943567	0.427535	0.504537	CNhs14241	CAGE:gastric cancer cell line:GSS
4905	1.19712	1.0972	0.0999261	0.391088	0.373068	0.0180196	0.00639281	0.219477	0.0235343	0.530835	0.504534	CNhs12024	CAGE:Endothelial Cells - Microvascular,
5207	0.657189	0.599141	0.0580479	0.254197	0.243661	0.0105356	0.00643364	0.219477	0.005703	0.417249	0.504529	CNhs13075	CAGE:mesothelioma cell line:ONE58
5028	0.798007	0.713999	0.0840082	0.311569	0.299828	0.0117413	0.00643442	0.219477	0.0446133	0.651183	0.504529	CNhs11866	CAGE:neuroectodermal tumor cell line:TASK1
4826	0.995007	0.907802	0.087205	0.390426	0.378058	0.0123683	0.00644794	0.219477	0.0304435	0.588169	0.504528	CNhs11247	CAGE:epithelioid sarcoma cell line:HS-ES-1
4816	1.16065	1.07198	0.088671	0.358432	0.344622	0.01381	0.00645279	0.219477	0.00498515	0.417249	0.504528	CNhs11987	CAGE:Smooth Muscle Cells - Coronary Artery,
5037	1.07535	0.964755	0.110597	0.408927	0.397261	0.0116661	0.00647438	0.219477	0.0177837	0.480818	0.504525	CNhs11877	CAGE:rhabdomyosarcoma cell line:KYM-1
4695	1.63318	1.46275	0.170428	0.510976	0.496535	0.014441	0.00659977	0.219477	0.0364324	0.606545	0.504513	CNhs10633	CAGE:thymus, adult, pool1
4951	0.779657	0.709345	0.0703118	0.325797	0.311191	0.0146058	0.00661277	0.219477	0.114992	0.801982	0.504512	CNhs11762	CAGE:eye, fetal,
5301	2.14118	1.96801	0.173169	0.599317	0.580798	0.018519	0.00663493	0.219477	0.0384858	0.614246	0.504509	CNhs14184	CAGE:Smooth muscle cells - airway, asthmatic,
5296	1.09928	0.999084	0.100191	0.369669	0.355325	0.0143433	0.00667684	0.219477	0.0136905	0.438585	0.504505	CNhs14132	CAGE:Fibroblast - Gingival, (chronic periodontitis)
4876	1.67476	1.53451	0.140251	0.491562	0.472353	0.019209	0.00671483	0.219477	0.0065881	0.417249	0.504502	CNhs12727	CAGE:Smooth Muscle Cells - Esophageal,
4924	0.312436	0.290371	0.0220647	0.147562	0.141381	0.00618127	0.00674432	0.219477	0.00462806	0.417249	0.504499	CNhs11729	CAGE:myxofibrosarcoma cell line:MFH-ino
4903	1.82288	1.67105	0.15183	0.520765	0.501254	0.0195112	0.00674741	0.219477	0.0184191	0.485114	0.504499	CNhs11923	CAGE:Chondrocyte - de diff,
4743	0.881079	0.801896	0.0791829	0.324029	0.313285	0.0107437	0.00687298	0.219477	0.0198882	0.501415	0.504487	CNhs10751	CAGE:giant cell carcinoma cell line:Lu99B
5227	0.205624	0.194467	0.0111562	0.12606	0.119924	0.00613613	0.00690256	0.219477	0.0524491	0.679887	0.504484	CNhs13443	CAGE:eye - muscle medial,
5179	0.962412	0.880698	0.0817142	0.36974	0.35367	0.0160697	0.00692861	0.219477	0.0822236	0.764134	0.504481	CNhs12858	CAGE:throat, adult
5070	0.695956	0.639995	0.0559602	0.258718	0.246501	0.0122167	0.00693332	0.219477	0.0036795	0.417249	0.504481	CNhs11953	CAGE:Fibroblast - Periodontal Ligament, (PL30)
4788	1.27243	1.15609	0.116339	0.441783	0.431076	0.0107062	0.006941	0.219477	0.0965804	0.797707	0.50448	CNhs11045	CAGE:cord blood derived cell line:COBL-a untreated
4801	2.15843	1.99695	0.161482	0.569169	0.54911	0.0200591	0.0069701	0.219477	0.00840481	0.417249	0.504477	CNhs12046	CAGE:Smooth Muscle Cells - Internal Thoracic Artery,
4728	1.30838	1.18031	0.12807	0.438226	0.424699	0.0135279	0.00698409	0.219477	0.0417351	0.641389	0.504476	CNhs10735	CAGE:transitional-cell carcinoma cell line:5637
4921	0.656099	0.601358	0.0547413	0.285201	0.274623	0.0105777	0.00706603	0.219477	0.00852451	0.417249	0.504468	CNhs11725	CAGE:argyrophil small cell carcinoma cell line:TC-YIK
4725	0.785616	0.716634	0.0689822	0.30446	0.292649	0.011811	0.00707424	0.219477	0.0313033	0.591867	0.504468	CNhs10732	CAGE:maxillary sinus tumor cell line:HSQ-89
4682	1.54713	1.39882	0.148309	0.501986	0.482855	0.0191311	0.00708164	0.219477	0.0172771	0.478089	0.504467	CNhs10619	CAGE:colon, adult, pool1
5286	0.582392	0.535371	0.0470206	0.268632	0.257226	0.0114064	0.00711328	0.219477	0.0953271	0.797707	0.504464	CNhs14077	CAGE:spinal cord, newborn,
607	0.205039	0.200611	0.0044288	0.1487	0.145961	0.00273944	0.00717779	0.219477	0.0120877	0.4366	0.504458	ENCFF193WRL	DNASE:adrenal gland female adult (51 year)
5259	0.382312	0.352155	0.0301566	0.201102	0.192306	0.00879647	0.00718785	0.219477	0.0724236	0.720574	0.504457	CNhs13794	CAGE:thalamus - adult,
4690	1.51525	1.39076	0.124487	0.491719	0.472221	0.0194988	0.00731992	0.219923	0.0264623	0.553623	0.504445	CNhs10628	CAGE:prostate, adult, pool1
4718	0.768326	0.681458	0.0868675	0.278477	0.268374	0.0101027	0.0073472	0.219923	0.0623209	0.707664	0.504443	CNhs10724	CAGE:acute myeloid leukemia (FAB M5) cell line:THP-1 (thawed)
5276	2.06443	1.8798	0.18463	0.622962	0.607935	0.0150275	0.00737348	0.219923	0.0949456	0.797707	0.50444	CNhs13924	CAGE:Mast cell, expanded,
5032	1.00679	0.928568	0.0782263	0.370475	0.357784	0.0126911	0.00738185	0.219923	0.00336738	0.417249	0.50444	CNhs11870	CAGE:liposarcoma cell line:KMLS-1
5051	0.898546	0.805703	0.0928425	0.329567	0.315838	0.0137282	0.00740941	0.219923	0.0106444	0.432573	0.504437	CNhs11893	CAGE:adrenal cortex adenocarcinoma cell line:SW-13
4812	2.89628	2.63839	0.25789	0.70095	0.681262	0.0196875	0.00752541	0.220546	0.0653424	0.707664	0.504427	CNhs11983	CAGE:Skeletal Muscle Cells,
4840	0.755739	0.689478	0.0662608	0.284697	0.27381	0.0108871	0.00756415	0.220546	0.00343323	0.417249	0.504424	CNhs11263	CAGE:mesothelioma cell line:ACC-MESO-1
4996	0.144753	0.136459	0.00829384	0.0828341	0.0788659	0.00396828	0.00768557	0.220546	0.00978078	0.432573	0.504413	CNhs11828	CAGE:tridermal teratoma cell line:HGRT
4824	1.21048	1.09433	0.116147	0.442153	0.428568	0.0135851	0.00772483	0.220546	0.00927002	0.427535	0.50441	CNhs11243	CAGE:prostate cancer cell line:PC-3
5197	1.00949	0.907799	0.101688	0.356364	0.343182	0.0131819	0.00774677	0.220546	0.0140036	0.438585	0.504408	CNhs13064	CAGE:mesothelioma cell line:NCI-H2452
4681	1.80054	1.65303	0.14751	0.576039	0.556107	0.0199322	0.00775295	0.220546	0.0346702	0.600009	0.504407	CNhs10618	CAGE:cervix, adult, pool1
4886	1.22903	1.12099	0.108036	0.379133	0.363274	0.015859	0.00783314	0.220546	0.0094954	0.427535	0.5044	CNhs12093	CAGE:Hepatic Stellate Cells (lipocyte),
1231	2.51389	2.532	-0.0181072	0.678851	0.667618	0.0112336	0.00788367	0.220546	0.0745225	0.730528	0.504396	ENCFF877SOO	CHIP:H3K4me3:SK-N-MC
4846	0.788348	0.702659	0.0856887	0.312726	0.299442	0.013284	0.00788501	0.220546	0.00996852	0.432573	0.504396	CNhs11269	CAGE:rhabdomyosarcoma cell line:RMS-YM
5127	1.18018	1.07933	0.100844	0.38917	0.374908	0.0142624	0.00789935	0.220546	0.0249071	0.540579	0.504395	CNhs12377	CAGE:mesenchymal precursor cell - ovarian cancer right ovary, (SOC-57-02)
4915	1.06101	0.967097	0.0939116	0.385246	0.372815	0.0124305	0.00792072	0.220546	0.0557918	0.694197	0.504393	CNhs11716	CAGE:papillary adenocarcinoma cell line:8505C
4849	1.16409	1.04329	0.120794	0.393149	0.37909	0.0140597	0.00792853	0.220546	0.00450793	0.417249	0.504392	CNhs11272	CAGE:glioblastoma cell line:T98G
4792	1.20771	1.09985	0.107858	0.426838	0.41506	0.0117782	0.00804255	0.222553	0.0366133	0.606545	0.504383	CNhs11050	CAGE:cord blood derived cell line:COBL-a 24h infection
5184	0.604029	0.549259	0.0547699	0.246889	0.238407	0.00848112	0.00811822	0.222695	0.0507253	0.675595	0.504377	CNhs13051	CAGE:acute myeloid leukemia (FAB M5) cell line:P31/FUJ
1207	3.55992	3.47213	0.0877936	0.792165	0.779407	0.012758	0.00819129	0.222695	0.0419636	0.641389	0.504371	ENCFF254FXT	CHIP:H3K4me3:fibroblast of villous mesenchyme
4998	0.916375	0.828409	0.0879658	0.358861	0.345294	0.013567	0.00819377	0.222695	0.020385	0.501415	0.504371	CNhs11830	CAGE:peripheral neuroectodermal tumor cell line:KU-SN
5091	1.06094	0.980871	0.0800709	0.423355	0.408143	0.0152124	0.00821537	0.222695	0.0139375	0.438585	0.504369	CNhs14222	CAGE:spinal cord, adult,
4696	1.62633	1.49353	0.132801	0.52665	0.506592	0.0200574	0.00826303	0.22285	0.0264179	0.553623	0.504365	CNhs10634	CAGE:thyroid, adult, pool1
4775	2.24442	2.06966	0.174753	0.610614	0.593735	0.0168789	0.00835537	0.22369	0.0719942	0.718995	0.504358	CNhs10870	CAGE:Myoblast,
4709	1.94863	1.77288	0.175752	0.598685	0.578248	0.0204371	0.00837838	0.22369	0.0549709	0.692086	0.504356	CNhs10648	CAGE:dura mater, adult,
4688	1.51187	1.38606	0.12581	0.489132	0.469519	0.0196129	0.00848451	0.224945	0.0154337	0.459195	0.504347	CNhs10626	CAGE:ovary, adult, pool1
4832	0.675997	0.620034	0.0559634	0.289939	0.279296	0.0106422	0.00851005	0.224945	0.00883975	0.419336	0.504345	CNhs11254	CAGE:melanoma cell line:G-361
5237	3.64703	3.48285	0.16418	0.779509	0.768456	0.0110536	0.00858297	0.225749	0.0515462	0.676031	0.50434	CNhs13483	CAGE:CD14+ monocytes - treated with Trehalose dimycolate (TDM),
5134	0.26183	0.24841	0.0134192	0.126026	0.120071	0.00595433	0.00869369	0.226432	0.0202954	0.501415	0.504331	CNhs12529	CAGE:promyelocytes/myelocytes PMC,
4833	0.596002	0.545731	0.0502715	0.24768	0.238772	0.00890799	0.00872274	0.226432	0.0332506	0.596108	0.504329	CNhs11255	CAGE:rectal cancer cell line:TT1TKB
5113	0.778486	0.71403	0.0644552	0.278573	0.26566	0.0129133	0.00875406	0.226432	0.00628813	0.417249	0.504326	CNhs12347	CAGE:Hair Follicle Outer Root Sheath Cells,
4895	0.674663	0.626808	0.0478545	0.245515	0.231953	0.0135622	0.00880585	0.226432	0.00608282	0.417249	0.504322	CNhs11347	CAGE:Mesenchymal Stem Cells - umbilical,
5242	3.19859	3.02242	0.176167	0.722598	0.711061	0.0115368	0.00882201	0.226432	0.0596573	0.707664	0.504321	CNhs13487	CAGE:CD14+ monocytes - treated with Cryptococcus,
4677	1.68001	1.51943	0.160579	0.537074	0.519178	0.0178961	0.00888067	0.22678	0.0711242	0.718409	0.504317	CNhs10612	CAGE:Universal RNA - Human Normal Tissues Biochain, pool1
5249	0.531677	0.476227	0.0554503	0.221893	0.213262	0.00863098	0.00892096	0.22678	0.0178282	0.480818	0.504314	CNhs13502	CAGE:acute myeloid leukemia (FAB M2) cell line:Kasumi-1
5267	0.317672	0.293426	0.0242467	0.172091	0.163964	0.00812699	0.00897142	0.226977	0.144609	0.845533	0.50431	CNhs13802	CAGE:caudate nucleus - adult,
5046	0.151998	0.137516	0.0144815	0.0870418	0.0830805	0.00396136	0.00905324	0.227653	0.0283356	0.568138	0.504304	CNhs11888	CAGE:acute myeloid leukemia (FAB M7) cell line:MKPL-1
4755	0.19394	0.180409	0.0135313	0.101316	0.0961161	0.00520024	0.00908588	0.227653	0.0201657	0.501415	0.504301	CNhs10848	CAGE:Fibroblast - Gingival, (GFH2)
5200	0.79941	0.722838	0.0765717	0.296231	0.28446	0.0117708	0.00915609	0.227653	0.00338619	0.417249	0.504296	CNhs13067	CAGE:mesothelioma cell line:Mero-41
5149	0.716522	0.63902	0.0775018	0.27095	0.259152	0.0117981	0.00920846	0.227653	0.00463762	0.417249	0.504292	CNhs12595	CAGE:Smooth Muscle Cells - Intestinal,
1692	5.21219	5.08941	0.12278	1.18545	1.17013	0.0153193	0.00921238	0.227653	0.0730107	0.725058	0.504292	ENCFF507JDZ	CHIP:H3K4me3:foreskin fibroblast male newborn
4942	0.159611	0.152806	0.00680557	0.0882499	0.0846809	0.00356905	0.00933692	0.227959	0.00698648	0.417249	0.504283	CNhs11750	CAGE:lens epithelial cell line:SRA 01/04
4731	1.06314	0.957412	0.10573	0.388779	0.377878	0.0109011	0.00933825	0.227959	0.00737918	0.417249	0.504283	CNhs10738	CAGE:adult T-cell leukemia cell line:ATN-1
1835	4.1904	4.11957	0.0708261	1.09401	1.08114	0.0128742	0.00938764	0.227959	0.0959313	0.797707	0.504279	ENCFF560BAF	CHIP:H3K4me3:foreskin fibroblast male newborn
4683	1.52804	1.38243	0.145614	0.493961	0.473223	0.0207377	0.00947044	0.227959	0.0261712	0.553623	0.504273	CNhs10620	CAGE:esophagus, adult, pool1
5195	0.90014	0.813145	0.0869948	0.326458	0.315221	0.0112369	0.00951156	0.227959	0.0150507	0.456939	0.50427	CNhs13062	CAGE:mesothelioma cell line:NCI-H226
1184	3.75598	3.68585	0.0701249	0.785048	0.772426	0.0126216	0.00951795	0.227959	0.0658275	0.707664	0.50427	ENCFF259BDX	CHIP:H3K4me3:foreskin fibroblast male newborn
1165	2.36181	2.33883	0.0229814	0.645486	0.634013	0.0114731	0.00966219	0.227959	0.00830177	0.417249	0.50426	ENCFF493FOT	CHIP:H3K4me3:cardiac fibroblast
43	0.205661	0.203015	0.00264618	0.165999	0.162666	0.00333372	0.00967411	0.227959	0.036496	0.606545	0.504259	ENCFF300IKA	DNASE:osteoblast
4899	1.69466	1.56701	0.127649	0.485916	0.468483	0.0174332	0.00968557	0.227959	0.0065265	0.417249	0.504258	CNhs11351	CAGE:Fibroblast - skin normal,
4838	1.14589	1.03651	0.109379	0.405278	0.393833	0.0114449	0.00968817	0.227959	0.0102347	0.432573	0.504258	CNhs11260	CAGE:prostate cancer cell line:DU145
1185	3.86606	3.77467	0.0913837	0.795234	0.78081	0.0144235	0.00969673	0.227959	0.0217328	0.511527	0.504257	ENCFF044HJS	CHIP:H3K4me3:HFF-Myc originated from foreskin fibroblast
5018	0.589359	0.543415	0.0459443	0.232589	0.22189	0.0106991	0.00991007	0.230954	0.0063969	0.417249	0.504242	CNhs11854	CAGE:neurofibroma cell line:Hs 53.T
4790	1.05747	0.971642	0.0858302	0.393166	0.380886	0.0122798	0.00991105	0.230954	0.0058556	0.417249	0.504242	CNhs11047	CAGE:embryonic kidney cell line: HEK293/SLAM infection, 24hr
1104	3.69682	3.64845	0.0483756	0.815568	0.801191	0.0143773	0.0100434	0.233015	0.11492	0.801982	0.504233	ENCFF665GSY	CHIP:H3K4me3:AG04449
13	0.206376	0.201268	0.00510806	0.167983	0.164664	0.00331898	0.0101316	0.233352	0.0269708	0.553997	0.504227	ENCFF713YTW	DNASE:GM12891
4930	0.83003	0.751371	0.0786592	0.330872	0.317594	0.0132776	0.0101458	0.233352	0.0599993	0.707664	0.504226	CNhs11737	CAGE:gastric adenocarcinoma cell line:MKN1
4823	1.81142	1.64686	0.164567	0.560778	0.545315	0.0154627	0.010232	0.23357	0.0139414	0.438585	0.50422	CNhs11185	CAGE:glioblastoma cell line:A172, tech_
5074	1.04865	0.964459	0.0841885	0.35249	0.338052	0.0144379	0.0102432	0.23357	0.0137617	0.438585	0.50422	CNhs11996	CAGE:Fibroblast - Periodontal Ligament, (PLH3)
5201	0.764878	0.697621	0.0672571	0.28699	0.275964	0.0110258	0.0103612	0.234825	0.0151395	0.457025	0.504212	CNhs13068	CAGE:mesothelioma cell line:Mero-48a
4857	0.849636	0.770239	0.0793972	0.31553	0.302513	0.0130165	0.0103879	0.234825	0.0175485	0.480818	0.50421	CNhs11281	CAGE:melanoma cell line:COLO 679
4909	0.85818	0.784611	0.0735682	0.303295	0.290262	0.0130326	0.0104381	0.234825	0.00247905	0.417249	0.504207	CNhs12029	CAGE:Fibroblast - Lung,
4687	1.50841	1.35672	0.151685	0.49971	0.479873	0.0198363	0.010475	0.234825	0.0222552	0.51634	0.504204	CNhs10625	CAGE:lung, adult, pool1
5147	0.303915	0.276305	0.0276107	0.144235	0.136967	0.00726883	0.0106073	0.234952	0.0311951	0.591867	0.504196	CNhs12586	CAGE:Oligodendrocyte - precursors,
5230	0.303062	0.288434	0.0146282	0.194133	0.186997	0.00713576	0.010688	0.234952	0.0370445	0.607567	0.50419	CNhs13449	CAGE:optic nerve,
4944	1.16231	1.05274	0.109567	0.465902	0.451617	0.0142849	0.0106906	0.234952	0.074799	0.730528	0.50419	CNhs11753	CAGE:neuroectodermal tumor cell line:FU-RPNT-2
5168	1.17379	1.07419	0.0996078	0.461141	0.444392	0.0167487	0.0107538	0.234952	0.0676563	0.707664	0.504186	CNhs12847	CAGE:epididymis, adult
3964	4.35694	4.28355	0.0733929	1.1544	1.14188	0.0125203	0.0107557	0.234952	0.0670769	0.707664	0.504186	ENCFF595BNN	CHIP:H3K4me3:foreskin fibroblast male newborn
5129	2.03299	1.84256	0.190432	0.588823	0.570553	0.0182698	0.0109255	0.234952	0.158816	0.867001	0.504175	CNhs12506	CAGE:chorionic membrane cells,
4750	0.625273	0.574559	0.0507132	0.24948	0.238482	0.0109975	0.0109377	0.234952	0.0737757	0.728569	0.504175	CNhs10843	CAGE:Urothelial cells,
4713	1.78724	1.63906	0.148177	0.566371	0.547799	0.0185728	0.0109855	0.234952	0.0459281	0.661728	0.504172	CNhs10652	CAGE:kidney, fetal, pool1
4995	1.22486	1.11067	0.114197	0.446345	0.431819	0.0145257	0.0109916	0.234952	0.0898453	0.792747	0.504171	CNhs11827	CAGE:serous cystadenocarcinoma cell line:HTOA
4963	0.24778	0.2273	0.0204801	0.134417	0.126266	0.00815147	0.0109966	0.234952	0.0964587	0.797707	0.504171	CNhs11776	CAGE:skeletal muscle, fetal,
5229	0.33094	0.308988	0.021952	0.181554	0.174034	0.00751954	0.0110325	0.234952	0.0351653	0.601907	0.504169	CNhs13445	CAGE:Fingernail (including nail plate, eponychium and hyponychium),
4935	0.202959	0.192871	0.0100882	0.115926	0.111536	0.00439046	0.0110781	0.234952	0.0299264	0.580289	0.504166	CNhs11742	CAGE:hepatoblastoma cell line:HuH-6
5274	3.59043	3.29109	0.29934	0.804501	0.784944	0.019557	0.0110894	0.234952	0.0497508	0.672603	0.504165	CNhs13816	CAGE:Olfactory epithelial cells,
5125	1.56954	1.44441	0.12513	0.476957	0.460854	0.0161027	0.0110998	0.234952	0.041966	0.641389	0.504164	CNhs12373	CAGE:mesenchymal precursor cell - ovarian cancer right ovary,
4756	1.98191	1.83069	0.15122	0.570797	0.553954	0.0168428	0.0111877	0.235874	0.00939749	0.427535	0.504159	CNhs12012	CAGE:Mesothelial Cells,
5174	1.02103	0.935145	0.0858812	0.375066	0.359513	0.0155528	0.0112829	0.236458	0.0516598	0.676031	0.504153	CNhs12853	CAGE:tongue, adult
2720	1.54222	1.49462	0.0475991	0.644806	0.63134	0.0134662	0.0113044	0.236458	0.109307	0.798654	0.504152	ENCFF605OIM	CHIP:H3K4me3:layer of hippocampus female adult (75 years)
5033	1.16065	1.04524	0.115406	0.402717	0.389623	0.0130943	0.0113613	0.236716	0.0872827	0.788661	0.504148	CNhs11872	CAGE:thyroid carcinoma cell line:TCO-1
4693	1.39548	1.25944	0.136037	0.456476	0.440845	0.0156311	0.0115076	0.238218	0.069405	0.709473	0.504139	CNhs10631	CAGE:spleen, adult, pool1
3848	0.345896	0.337818	0.00807822	0.281232	0.276362	0.0048705	0.011523	0.238218	0.0239978	0.531251	0.504138	ENCFF848ZIL	CHIP:CTCF:stomach female adult (53 years)
4697	1.6612	1.50399	0.157209	0.526764	0.50654	0.0202242	0.0118387	0.240336	0.042711	0.646506	0.50412	CNhs10635	CAGE:trachea, adult, pool1
5043	1.07925	0.966636	0.112616	0.409704	0.397061	0.0126431	0.0118651	0.240336	0.0805719	0.759195	0.504118	CNhs11884	CAGE:teratocarcinoma cell line:NCR-G1
5224	0.172692	0.162593	0.0100996	0.108729	0.104377	0.00435187	0.0119315	0.240336	0.0749483	0.730642	0.504114	CNhs13440	CAGE:eye - vitreous humor,
5141	1.16657	1.03526	0.131314	0.374566	0.360377	0.014189	0.0119468	0.240336	0.00811758	0.417249	0.504113	CNhs12553	CAGE:CD34+ stem cells - adult bone marrow derived, , tech_
4807	1.93903	1.75393	0.1851	0.550068	0.533563	0.0165054	0.0119478	0.240336	0.0627497	0.707664	0.504113	CNhs11077	CAGE:Mammary Epithelial Cell,
4940	0.89112	0.816069	0.0750509	0.338507	0.325395	0.0131111	0.0119492	0.240336	0.0357183	0.605571	0.504113	CNhs11748	CAGE:endometrioid adenocarcinoma cell line:JHUEM-1
5054	0.587911	0.549426	0.0384851	0.23587	0.226934	0.00893588	0.0120567	0.240336	0.0426674	0.646506	0.504107	CNhs11903	CAGE:Gingival epithelial cells, (GEA15)
5115	1.2435	1.13015	0.113349	0.386097	0.368736	0.017361	0.0120915	0.240336	0.0193133	0.498114	0.504105	CNhs12341	CAGE:Cardiac Myocyte,
5198	1.53705	1.3893	0.14775	0.505015	0.490967	0.0140477	0.012125	0.240336	0.035233	0.601907	0.504103	CNhs14376	CAGE:mesothelioma cell line:Mero-14, tech_
4948	0.566264	0.527891	0.0383729	0.252571	0.240228	0.0123424	0.012134	0.240336	0.063701	0.707664	0.504102	CNhs11758	CAGE:heart, adult, diseased,
4888	1.02516	0.939896	0.0852672	0.329093	0.314805	0.0142886	0.0121683	0.240336	0.00713046	0.417249	0.5041	CNhs12921	CAGE:Keratocytes,
4850	1.28018	1.1713	0.108885	0.433135	0.418645	0.0144906	0.0121927	0.240336	0.0332226	0.596108	0.504099	CNhs11273	CAGE:squamous cell lung carcinoma cell line:EBC-1
4868	0.880328	0.823511	0.0568179	0.294643	0.280901	0.0137419	0.0122887	0.240336	0.00451928	0.417249	0.504093	CNhs12035	CAGE:Osteoblast - differentiated,
5130	0.261912	0.236394	0.0255183	0.118364	0.112459	0.00590524	0.012329	0.240336	0.0322352	0.595343	0.504091	CNhs12492	CAGE:Mesenchymal stem cells - umbilical,
1109	3.92716	3.84642	0.0807371	0.834074	0.818787	0.0152872	0.0123865	0.240336	0.0903462	0.792747	0.504088	ENCFF229ICS	CHIP:H3K4me3:AG04450
4735	1.16662	1.05894	0.107682	0.412625	0.399718	0.0129075	0.0124385	0.240336	0.00594262	0.417249	0.504085	CNhs10742	CAGE:astrocytoma cell line:TM-31
5213	1.68726	1.58584	0.101419	0.517598	0.507788	0.00981003	0.012519	0.240336	0.119537	0.809045	0.50408	CNhs13512	CAGE:CD4+CD25-CD45RA+ naive conventional T cells,
5038	1.18764	1.06076	0.126874	0.417615	0.404418	0.0131965	0.0125405	0.240336	0.102681	0.798654	0.504079	CNhs11878	CAGE:teratocarcinoma cell line:NCC-IT-A3
3587	2.10811	2.0484	0.0597162	0.745354	0.730268	0.0150865	0.0125587	0.240336	0.0694384	0.709473	0.504078	ENCFF671FBK	CHIP:H3K4me3:cingulate gyrus female adult (75 years)
4117	5.92875	5.53294	0.395811	1.26239	1.24206	0.0203316	0.0126298	0.240336	0.106663	0.798654	0.504074	ENCFF479QQQ	CHIP:H3K4me1:spinal cord female embryo (108 days)
5287	0.744656	0.701184	0.0434717	0.346521	0.335534	0.0109871	0.0126532	0.240336	0.103546	0.798654	0.504073	CNhs14078	CAGE:amygdala, newborn,
5244	2.86925	2.72545	0.143795	0.674002	0.663548	0.0104539	0.0127263	0.240336	0.0333217	0.596108	0.504069	CNhs13495	CAGE:CD14+ monocytes - treated with B-glucan,
4791	0.757189	0.710807	0.0463822	0.325427	0.318216	0.00721115	0.0127908	0.240336	0.158312	0.867001	0.504065	CNhs11049	CAGE:cord blood derived cell line:COBL-a 24h infection(-C)
1117	3.93538	3.84291	0.0924704	0.823141	0.809921	0.0132204	0.0128222	0.240336	0.0744381	0.730528	0.504064	ENCFF029UXF	CHIP:H3K4me3:fibroblast of the aortic adventitia female
4853	0.874715	0.803122	0.071593	0.347401	0.337275	0.0101258	0.0128365	0.240336	0.0855201	0.777978	0.504063	CNhs11276	CAGE:neuroblastoma cell line:CHP-134
5307	0.420596	0.38139	0.0392066	0.180436	0.172897	0.00753902	0.0128688	0.240336	0.00784855	0.417249	0.504061	CNhs14238	CAGE:squamous cell lung carcinoma cell line:LC-1F
4724	0.513023	0.467442	0.0455803	0.2142	0.206567	0.00763232	0.0129316	0.240336	0.0252432	0.545191	0.504058	CNhs10731	CAGE:glioma cell line:GI-1
5302	1.53576	1.40796	0.1278	0.490977	0.474023	0.0169544	0.012988	0.240336	0.0351835	0.601907	0.504054	CNhs14192	CAGE:Smooth muscle cells - airway, control,
5073	0.676941	0.630728	0.0462137	0.251489	0.240403	0.0110851	0.013018	0.240336	0.00642662	0.417249	0.504053	CNhs11979	CAGE:Hair Follicle Dermal Papilla Cells,
4746	1.2578	1.15119	0.106608	0.391634	0.375377	0.016257	0.0130584	0.240336	0.0208792	0.504984	0.504051	CNhs10837	CAGE:Endothelial Cells - Aortic,
4908	2.81991	2.56064	0.259262	0.684901	0.666279	0.0186229	0.0130675	0.240336	0.0380273	0.614246	0.50405	CNhs12499	CAGE:Fibroblast - Dermal,
5023	0.99983	0.897905	0.101925	0.358061	0.34646	0.011601	0.0131071	0.240336	0.00871722	0.417249	0.504048	CNhs11860	CAGE:fibrosarcoma cell line:HT-1080
5126	2.03723	1.89166	0.14557	0.563987	0.54754	0.0164466	0.0131183	0.240336	0.0490369	0.671299	0.504047	CNhs13097	CAGE:mesenchymal precursor cell - ovarian cancer metastasis,
4910	1.03235	0.957067	0.0752842	0.398275	0.382061	0.0162141	0.0133088	0.242989	0.038495	0.614246	0.504037	CNhs11676	CAGE:uterus, adult, pool1
1962	4.75762	4.63604	0.121583	1.16029	1.14613	0.0141613	0.0133898	0.243036	0.109739	0.798654	0.504033	ENCFF545DRY	CHIP:H3K9ac:adipocyte originated from mesenchymal stem cell
5271	1.19152	1.09495	0.0965739	0.458253	0.441723	0.0165297	0.0134056	0.243036	0.0650183	0.707664	0.504032	CNhs13807	CAGE:spinal cord - adult,
1224	4.05776	3.94248	0.115275	0.830475	0.818088	0.0123875	0.0134486	0.243036	0.0344344	0.597876	0.50403	ENCFF626WKG	CHIP:H3K4me3:fibroblast of lung male adult (45 years)
4007	4.01919	3.95162	0.0675681	1.14414	1.13532	0.00881445	0.0135528	0.244089	0.0135688	0.438585	0.504024	ENCFF939PLA	CHIP:H3K4me1:mucosa of rectum female adult (61 year)
4918	0.502385	0.469446	0.0329393	0.205021	0.194813	0.0102081	0.0136095	0.244282	0.0176089	0.480818	0.504021	CNhs11722	CAGE:leiomyoma cell line:10964C
1234	2.43915	2.49004	-0.0508888	0.620624	0.609723	0.0109004	0.0136998	0.244741	0.155302	0.863098	0.504017	ENCFF749OUM	CHIP:H3K4me3:SK-N-SH treated with 6 uM all-trans-retinoic acid for 48 hours
4702	2.21294	2.08867	0.124274	0.647281	0.62904	0.0182411	0.0137901	0.244741	0.0330775	0.596108	0.504012	CNhs10641	CAGE:parietal lobe, adult, pool1
5220	0.791009	0.704499	0.0865099	0.286614	0.276651	0.00996327	0.0138866	0.244741	0.0056972	0.417249	0.504007	CNhs13241	CAGE:acute myeloid leukemia (FAB M0) cell line:Kasumi-3
4680	1.99231	1.8551	0.137215	0.604257	0.585765	0.0184913	0.013969	0.244741	0.0837551	0.76988	0.504003	CNhs10617	CAGE:brain, adult, pool1
4769	2.15896	1.96227	0.196697	0.639245	0.622146	0.0170993	0.0139715	0.244741	0.082951	0.767773	0.504003	CNhs12005	CAGE:Astrocyte - cerebral cortex,
5030	0.581247	0.534626	0.0466213	0.234231	0.223984	0.0102471	0.0140079	0.244741	0.0182656	0.485114	0.504001	CNhs11868	CAGE:hepatic mesenchymal tumor cell line:LI90
5013	0.564968	0.509146	0.0558219	0.235504	0.225176	0.0103286	0.0140627	0.244741	0.0115805	0.4366	0.503998	CNhs11848	CAGE:leiomyoblastoma cell line:G-402
5206	0.52824	0.476805	0.0514341	0.217487	0.20755	0.00993732	0.0140648	0.244741	0.0183108	0.485114	0.503998	CNhs13074	CAGE:mesothelioma cell line:No36
5036	1.27225	1.13851	0.133738	0.454046	0.441682	0.0123642	0.0141049	0.244741	0.0800628	0.759195	0.503996	CNhs11876	CAGE:testicular germ cell embryonal carcinoma cell line:ITO-II
4938	0.760538	0.702322	0.0582162	0.312251	0.301819	0.010432	0.014218	0.244741	0.137545	0.837941	0.50399	CNhs11746	CAGE:serous adenocarcinoma cell line:JHOS-2
5065	0.842644	0.768567	0.0740768	0.348421	0.337102	0.0113193	0.0142494	0.244741	0.0984319	0.798654	0.503989	CNhs11944	CAGE:mixed mullerian tumor cell line:HTMMT
1111	2.89582	2.85642	0.0394008	0.685031	0.674189	0.0108414	0.0142838	0.244741	0.0566641	0.695281	0.503987	ENCFF252FYX	CHIP:H3K4me3:AG09309
1115	3.9241	3.81988	0.104221	0.826517	0.812895	0.0136214	0.014299	0.244741	0.130846	0.822743	0.503986	ENCFF150CNL	CHIP:H3K4me3:AG10803
4937	0.879212	0.802896	0.0763153	0.348676	0.337367	0.0113088	0.0143233	0.244741	0.0524663	0.679887	0.503985	CNhs11745	CAGE:clear cell carcinoma cell line:JHOC-5
5288	0.59936	0.550883	0.0484766	0.278632	0.26642	0.0122119	0.0143279	0.244741	0.153234	0.861211	0.503985	CNhs14079	CAGE:medulla oblongata, newborn,
5118	2.17869	1.95551	0.223176	0.587955	0.56563	0.0223252	0.0143721	0.244741	0.00637329	0.417249	0.503982	CNhs12570	CAGE:Melanocyte - dark,
458	0.252903	0.240139	0.0127639	0.171342	0.16575	0.00559223	0.0145124	0.246339	0.141185	0.841878	0.503975	ENCFF503ZTL	DNASE:brain male embryo (101 day)
1758	4.04007	4.03791	0.00215721	1.02568	1.01637	0.00930715	0.0147708	0.24931	0.0203654	0.501415	0.503963	ENCFF197WCC	CHIP:H3K9ac:skeletal muscle satellite cell female adult originated from mesodermal cell
4699	2.27201	2.13725	0.134761	0.642324	0.621849	0.020475	0.0147974	0.24931	0.0265605	0.553623	0.503961	CNhs10637	CAGE:temporal lobe, adult, pool1
3475	5.31145	5.16571	0.145741	1.15671	1.14469	0.0120202	0.0148762	0.24931	0.0108286	0.432573	0.503958	ENCFF851RBH	CHIP:H3K27ac:large intestine male embryo (108 days)
4706	2.2141	2.06163	0.152468	0.652547	0.633015	0.0195318	0.0149212	0.24931	0.163519	0.868863	0.503955	CNhs10645	CAGE:medulla oblongata, adult, pool1
5253	0.459288	0.429803	0.0294847	0.196107	0.188664	0.00744238	0.015006	0.24931	0.0431016	0.646623	0.503951	CNhs13507	CAGE:mesenchymal precursor cell - ovarian cancer right ovary, (SOC-57-02-G)
5078	1.29946	1.17558	0.123877	0.399772	0.384128	0.0156433	0.0150154	0.24931	0.0208521	0.504984	0.503951	CNhs12073	CAGE:Schwann Cells,
1239	3.89397	3.81663	0.077342	0.835307	0.822407	0.0129003	0.0150159	0.24931	0.0309103	0.59093	0.503951	ENCFF319QVY	CHIP:H3K4me3:WI38
4873	1.59582	1.47204	0.123778	0.464013	0.447098	0.0169153	0.0153126	0.253445	0.0446127	0.651183	0.503937	CNhs12117	CAGE:Astrocyte - cerebellum,
411	0.196207	0.185675	0.010532	0.142934	0.137582	0.00535274	0.0154122	0.254301	0.0931182	0.792747	0.503932	ENCFF681JFJ	DNASE:putamen male adult (78 years)
5173	0.546993	0.500486	0.0465066	0.260316	0.248879	0.0114372	0.0157115	0.258194	0.0958659	0.797707	0.503918	CNhs12852	CAGE:submaxillary gland, adult
4729	1.11133	1.01546	0.0958706	0.395605	0.38265	0.012955	0.0157453	0.258194	0.0721653	0.719351	0.503917	CNhs10736	CAGE:breast carcinoma cell line:MDA-MB-453
4884	1.05539	0.968399	0.0869907	0.341033	0.326876	0.0141566	0.0158366	0.258892	0.0205273	0.502587	0.503912	CNhs11333	CAGE:Renal Mesangial Cells,
4719	0.270936	0.251353	0.0195829	0.130726	0.124087	0.00663912	0.0159036	0.25919	0.0358814	0.605571	0.503909	CNhs10726	CAGE:lung adenocarcinoma cell line:PC-14
5015	1.03454	0.925677	0.10886	0.364126	0.350356	0.0137703	0.0160233	0.259412	0.0509456	0.675628	0.503904	CNhs11851	CAGE:liposarcoma cell line:SW 872
4744	1.17322	1.07165	0.101568	0.414254	0.401139	0.0131149	0.0161613	0.259412	0.0366462	0.606545	0.503898	CNhs10752	CAGE:oral squamous cell carcinoma cell line:Ca9-22
4877	0.962509	0.877436	0.0850728	0.319151	0.304578	0.0145735	0.0161985	0.259412	0.00558357	0.417249	0.503896	CNhs12084	CAGE:Alveolar Epithelial Cells,
4700	2.207	2.07994	0.127054	0.641661	0.623339	0.0183218	0.0162107	0.259412	0.0559566	0.69462	0.503895	CNhs10638	CAGE:postcentral gyrus, adult, pool1
2919	2.52994	2.47832	0.0516291	0.762268	0.75192	0.0103475	0.0162108	0.259412	0.0775225	0.741294	0.503895	ENCFF285HWO	CHIP:H3K4me3:GM23248
4796	1.16073	1.0738	0.0869347	0.377313	0.363632	0.0136817	0.016221	0.259412	0.0134649	0.438585	0.503895	CNhs11057	CAGE:Mesenchymal Stem Cells - Wharton's Jelly,
4679	1.51018	1.37321	0.136975	0.495809	0.476336	0.0194738	0.0163075	0.259412	0.0543267	0.688873	0.503891	CNhs10616	CAGE:bladder, adult, pool1
5011	0.38052	0.343345	0.0371755	0.17451	0.167648	0.00686236	0.0163352	0.259412	0.0614342	0.707664	0.50389	CNhs11845	CAGE:biphenotypic B myelomonocytic leukemia cell line:MV-4-11
5277	1.55647	1.42291	0.133557	0.50696	0.494662	0.0122987	0.0164177	0.259412	0.133119	0.825372	0.503886	CNhs13925	CAGE:Mast cell, expanded and stimulated,
4714	1.837	1.70331	0.133685	0.582257	0.56641	0.0158475	0.0164615	0.259412	0.277135	0.958124	0.503884	CNhs10653	CAGE:heart, fetal, pool1
4749	1.36314	1.24451	0.118629	0.423408	0.406954	0.0164541	0.0164907	0.259412	0.0120282	0.4366	0.503883	CNhs10842	CAGE:Retinal Pigment Epithelial Cells,
5140	0.619632	0.561421	0.0582113	0.23371	0.225405	0.00830522	0.016513	0.259412	0.015947	0.460469	0.503882	CNhs12552	CAGE:CD133+ stem cells - adult bone marrow derived, pool1
5182	0.523839	0.466956	0.0568822	0.226024	0.216991	0.00903256	0.0165921	0.259412	0.0211296	0.507971	0.503878	CNhs13049	CAGE:acute myeloid leukemia (FAB M7) cell line:M-MOK
5272	1.67556	1.56082	0.114738	0.589083	0.573171	0.0159117	0.0166141	0.259412	0.11947	0.809045	0.503877	CNhs13808	CAGE:locus coeruleus - adult,
5247	2.13452	1.91329	0.221236	0.583928	0.566421	0.0175063	0.0166496	0.259412	0.0355202	0.604868	0.503876	CNhs13479	CAGE:Hep-2 cells mock treated, biol_
3668	3.14297	3.06544	0.0775268	0.901365	0.884125	0.01724	0.0171105	0.265812	0.0375648	0.612213	0.503856	ENCFF158JUA	CHIP:H3K4me3:temporal lobe male adult (81 year)
4805	1.46125	1.33884	0.122412	0.465148	0.454121	0.0110268	0.0172014	0.266445	0.0681958	0.707664	0.503852	CNhs11675	CAGE:Whole blood (ribopure), , donation1
4971	0.671436	0.610586	0.0608504	0.332406	0.320718	0.0116876	0.0174434	0.269409	0.143141	0.844069	0.503842	CNhs11786	CAGE:lung, right lower lobe, adult,
5180	0.222992	0.207719	0.0152729	0.114317	0.107147	0.00717037	0.0176267	0.271452	0.0226836	0.520004	0.503834	CNhs12893	CAGE:Smooth Muscle Cells - Bladder,
4799	2.25948	2.05272	0.206761	0.610067	0.591507	0.0185598	0.0176811	0.271502	0.0343784	0.597876	0.503832	CNhs11381	CAGE:Keratinocyte - epidermal,
5006	0.678721	0.616255	0.0624652	0.272786	0.261893	0.0108931	0.0177793	0.272223	0.0295315	0.57897	0.503828	CNhs11840	CAGE:bronchioalveolar carcinoma cell line:NCI-H358
4933	0.447304	0.417268	0.0300357	0.203263	0.196039	0.00722407	0.017999	0.274795	0.0673352	0.707664	0.503818	CNhs11740	CAGE:granulosa cell tumor cell line:KGN
5061	0.842657	0.768612	0.0740455	0.316477	0.30447	0.0120073	0.0182682	0.277024	0.0122224	0.4366	0.503807	CNhs11933	CAGE:pleomorphic hepatocellular carcinoma cell line:SNU-387
5026	0.739081	0.664653	0.0744282	0.306516	0.298062	0.00845334	0.0183373	0.277024	0.0131468	0.438585	0.503805	CNhs11864	CAGE:acute myeloid leukemia (FAB M2) cell line:NKM-1
4745	1.12822	1.01911	0.109113	0.389675	0.377525	0.0121498	0.0183774	0.277024	0.0996941	0.798654	0.503803	CNhs10753	CAGE:signet ring carcinoma cell line:Kato III
4730	0.58009	0.525716	0.0543741	0.238181	0.230825	0.00735635	0.0184213	0.277024	0.019922	0.501415	0.503801	CNhs10737	CAGE:colon carcinoma cell line:COLO-320
4859	1.07893	0.985184	0.0937448	0.380533	0.366414	0.0141189	0.0184251	0.277024	0.0238182	0.531251	0.503801	CNhs11283	CAGE:cholangiocellular carcinoma cell line:HuH-28
5076	0.175696	0.161602	0.014094	0.0937844	0.088323	0.00546142	0.0184579	0.277024	0.0247947	0.540579	0.5038	CNhs12065	CAGE:Preadipocyte - perirenal,
947	2.87167	2.81465	0.0570168	0.965849	0.954859	0.01099	0.0185643	0.277217	0.105209	0.798654	0.503795	ENCFF709BXS	CHIP:POLR2A:Ishikawa treated with 0.02% dimethyl sulfoxide for 1 hour
5170	0.404956	0.372844	0.0321119	0.188894	0.178264	0.01063	0.0186111	0.277217	0.00852108	0.417249	0.503794	CNhs12849	CAGE:parotid gland, adult
5108	3.00158	2.70985	0.291724	0.761718	0.74545	0.0162679	0.0186415	0.277217	0.0718574	0.71898	0.503792	CNhs12326	CAGE:epitheloid carcinoma cell line: HelaS3 ENCODE, biol_
5289	0.616246	0.572255	0.0439909	0.286995	0.276799	0.0101957	0.0186794	0.277217	0.260909	0.945159	0.503791	CNhs14080	CAGE:locus coeruleus, newborn,
5042	1.22767	1.11539	0.11228	0.4139	0.400423	0.0134768	0.0188449	0.27875	0.0678582	0.707664	0.503784	CNhs11883	CAGE:tubular adenocarcinoma cell line:SUIT-2
4997	0.291833	0.27126	0.0205723	0.144258	0.137274	0.006984	0.0189347	0.27875	0.0132867	0.438585	0.503781	CNhs11829	CAGE:sacrococcigeal teratoma cell line:HTST
4925	0.26774	0.250684	0.0170553	0.132237	0.12651	0.00572693	0.0189484	0.27875	0.0366135	0.606545	0.50378	CNhs11731	CAGE:embryonic pancreas cell line:1B2C6
2669	2.43799	2.38576	0.0522354	0.792089	0.77829	0.0137995	0.0189926	0.27875	0.117531	0.808866	0.503778	ENCFF708QSO	CHIP:H3K4me3:middle frontal area 46 male adult (81 year)
5188	0.978178	0.872879	0.105299	0.33822	0.32874	0.00947934	0.0190688	0.279067	0.0337716	0.596108	0.503775	CNhs13055	CAGE:acute myeloid leukemia (FAB M3) cell line:HL60
4818	1.05771	0.984786	0.07292	0.344448	0.330407	0.0140409	0.0191192	0.279067	0.00652952	0.417249	0.503774	CNhs11090	CAGE:Smooth Muscle Cells - Subclavian Artery,
4299	4.46255	4.21207	0.250477	1.15866	1.14537	0.013288	0.0192417	0.280085	0.243875	0.928942	0.503769	ENCFF272PJK	CHIP:H3K36me3:thymus male child (3 years)
5265	0.445636	0.407391	0.0382453	0.228866	0.218801	0.010065	0.0193669	0.281137	0.232908	0.927634	0.503764	CNhs13800	CAGE:medulla oblongata - adult,
4835	0.541783	0.501511	0.0402715	0.261446	0.254297	0.00714871	0.0195008	0.282177	0.0968291	0.797707	0.503759	CNhs11257	CAGE:renal cell carcinoma cell line:TUHR10TKB
4717	0.604841	0.538088	0.0667533	0.231775	0.222994	0.00878146	0.0195782	0.282177	0.113437	0.799863	0.503756	CNhs10723	CAGE:acute myeloid leukemia (FAB M5) cell line:THP-1 (revived)
179	0.27319	0.260977	0.0122131	0.187207	0.181318	0.00588812	0.0195978	0.282177	0.0693461	0.709473	0.503755	ENCFF735MKP	DNASE:brain female embryo (85 days)
4847	0.998065	0.901862	0.0962024	0.349399	0.337924	0.0114755	0.0196913	0.282757	0.0923211	0.792747	0.503751	CNhs11270	CAGE:signet ring carcinoma cell line:NUGC-4
4770	1.29274	1.20144	0.0912917	0.433893	0.418618	0.0152748	0.0197867	0.28336	0.040998	0.641389	0.503748	CNhs11906	CAGE:Endothelial Cells - Lymphatic,
4711	1.76301	1.59162	0.171389	0.565714	0.552458	0.0132559	0.0201478	0.287003	0.156002	0.864526	0.503734	CNhs10650	CAGE:thymus, fetal, pool1
4806	1.21231	1.11494	0.0973753	0.409449	0.399435	0.0100136	0.0201491	0.287003	0.114552	0.801982	0.503734	CNhs11671	CAGE:Whole blood (ribopure), , donation2
5205	0.779132	0.709177	0.0699546	0.297916	0.286815	0.0111012	0.0202488	0.287504	0.0564851	0.695281	0.50373	CNhs13073	CAGE:mesothelioma cell line:Mero-95
5000	0.121812	0.115454	0.00635833	0.0692518	0.0659707	0.00328114	0.0202925	0.287504	0.0107837	0.432573	0.503729	CNhs11833	CAGE:chondrosarcoma cell line:SW 1353
3527	2.7236	2.66533	0.0582669	1.038	1.02448	0.0135263	0.020489	0.289012	0.11008	0.798654	0.503722	ENCFF390BAT	CHIP:H3K27me3:chorionic villus male embryo (16 weeks)
4939	0.844897	0.770582	0.0743148	0.351706	0.341485	0.0102217	0.0205276	0.289012	0.0148204	0.452532	0.50372	CNhs11747	CAGE:carcinosarcoma cell line:JHUCS-1
1171	3.33949	3.28525	0.0542369	0.781891	0.76928	0.0126107	0.0205873	0.289012	0.0323836	0.595343	0.503718	ENCFF129PMO	CHIP:H3K4me3:choroid plexus epithelial cell
4689	1.46081	1.31868	0.142133	0.499276	0.481363	0.0179132	0.0206165	0.289012	0.0858761	0.778526	0.503717	CNhs10627	CAGE:placenta, adult, pool1
5279	0.759185	0.715663	0.0435219	0.338209	0.327228	0.0109807	0.0206738	0.289052	0.101411	0.798654	0.503715	CNhs14069	CAGE:medial frontal gyrus, newborn,
4710	2.11007	1.96866	0.141409	0.65175	0.632525	0.019225	0.0208182	0.290307	0.0752258	0.730645	0.50371	CNhs10649	CAGE:corpus callosum, adult, pool1
5270	0.340339	0.314648	0.0256906	0.180424	0.172278	0.00814533	0.0209689	0.291643	0.148424	0.858764	0.503704	CNhs13805	CAGE:pituitary gland - adult,
5062	1.05679	0.947432	0.109361	0.369487	0.359097	0.0103897	0.0211109	0.292848	0.0430772	0.646623	0.503699	CNhs11934	CAGE:myelodysplastic syndrome cell line:SKM-1
5260	0.391635	0.362352	0.0292835	0.204464	0.196355	0.00810927	0.0211657	0.292848	0.108588	0.798654	0.503697	CNhs13795	CAGE:hippocampus - adult,
4751	0.480123	0.43532	0.0448027	0.188169	0.180027	0.00814241	0.021251	0.293172	0.0298043	0.580037	0.503694	CNhs10844	CAGE:Mesenchymal stem cells - adipose,
4965	0.384634	0.35565	0.0289843	0.202508	0.193372	0.00913653	0.0212995	0.293172	0.111021	0.798654	0.503692	CNhs11779	CAGE:diaphragm, fetal,
5012	0.60587	0.546322	0.059548	0.258458	0.248621	0.0098374	0.0213788	0.293503	0.194558	0.903571	0.503689	CNhs11846	CAGE:carcinoid cell line:SK-PN-DW
4906	0.997411	0.909183	0.0882279	0.339758	0.324696	0.015062	0.0217118	0.297258	0.0321773	0.595343	0.503678	CNhs12026	CAGE:Endothelial Cells - Vein,
5167	0.587216	0.541489	0.0457272	0.2829	0.271773	0.0111271	0.0217642	0.297258	0.198104	0.909013	0.503676	CNhs12846	CAGE:ductus deferens, adult
4726	1.28149	1.16705	0.114435	0.416951	0.402588	0.0143634	0.0218668	0.297893	0.0460371	0.661728	0.503672	CNhs10733	CAGE:gall bladder carcinoma cell line:TGBC2TKB
4890	0.884024	0.810275	0.0737491	0.293621	0.280319	0.0133021	0.022142	0.300871	0.00826915	0.417249	0.503663	CNhs12124	CAGE:Trabecular Meshwork Cells,
5171	0.755099	0.699254	0.0558453	0.348734	0.335753	0.0129816	0.0223732	0.302737	0.173469	0.882451	0.503655	CNhs12850	CAGE:penis, adult
2084	2.11541	2.07469	0.0407202	0.594727	0.583509	0.0112178	0.0223933	0.302737	0.0979726	0.798654	0.503654	ENCFF905GLU	CHIP:H3K4me3:stomach female embryo (98 days)
4703	2.27324	2.14317	0.130063	0.663251	0.644185	0.0190654	0.022617	0.304764	0.00481899	0.417249	0.503646	CNhs10642	CAGE:paracentral gyrus, adult, pool1
5290	0.583265	0.549395	0.0338705	0.270612	0.260903	0.00970864	0.022658	0.304764	0.23117	0.927634	0.503645	CNhs14081	CAGE:hippocampus, newborn,
4941	0.614002	0.567082	0.0469205	0.275615	0.264804	0.0108112	0.0231159	0.310139	0.108609	0.798654	0.50363	CNhs11749	CAGE:squamous cell carcinoma cell line:JHUS-nk1
4325	0.271139	0.266359	0.00478047	0.203838	0.201214	0.00262336	0.0232106	0.310571	0.0921134	0.792747	0.503626	ENCFF254GWA	CHIP:H3K4me3:transverse colon female adult (53 years)
4955	0.610897	0.559125	0.0517723	0.280619	0.268041	0.0125774	0.0232651	0.310571	0.0934399	0.793045	0.503625	CNhs11766	CAGE:trachea, fetal,
5196	0.986114	0.888632	0.0974813	0.350415	0.338099	0.012316	0.0233978	0.31156	0.00814992	0.417249	0.50362	CNhs13063	CAGE:mesothelioma cell line:NCI-H2052
5138	2.30609	2.172	0.134087	0.560949	0.550468	0.0104813	0.0235569	0.312894	0.0760669	0.733473	0.503615	CNhs12546	CAGE:Basophils,
5157	0.990833	0.890769	0.100064	0.370799	0.356699	0.0141004	0.0240309	0.316425	0.0487424	0.671299	0.5036	CNhs12808	CAGE:small cell lung carcinoma cell line:DMS 144
36	0.2181	0.210696	0.0074039	0.173596	0.169197	0.00439845	0.0240804	0.316425	0.0370509	0.607567	0.503598	ENCFF809IIW	DNASE:LNCaP clone FGC
5203	0.897415	0.816855	0.0805601	0.33821	0.327671	0.0105392	0.0241234	0.316425	0.0245927	0.539921	0.503597	CNhs13070	CAGE:mesothelioma cell line:Mero-83
4987	0.156971	0.146861	0.0101092	0.0856361	0.0815832	0.00405291	0.0241884	0.316425	0.00460499	0.417249	0.503595	CNhs11814	CAGE:embryonic pancreas cell line:2C6
5240	3.27376	3.15177	0.121985	0.72871	0.718275	0.0104353	0.024191	0.316425	0.0309299	0.59093	0.503595	CNhs13533	CAGE:CD14+ monocytes - treated with lipopolysaccharide,
5311	1.13188	1.01654	0.11534	0.41121	0.398167	0.0130429	0.0242333	0.316425	0.124312	0.814376	0.503593	CNhs14244	CAGE:carcinoid cell line:NCI-H727
5088	0.0613447	0.0651757	-0.003831	0.0403921	0.0381818	0.00221031	0.0242396	0.316425	0.0403028	0.633516	0.503593	CNhs12192	CAGE:leiomyosarcoma cell line:Hs 5.T
4722	0.776576	0.709638	0.066938	0.30041	0.289979	0.0104309	0.0243249	0.316761	0.0264858	0.553623	0.50359	CNhs10729	CAGE:renal cell carcinoma cell line:OS-RC-2
4980	0.28488	0.263006	0.0218734	0.16234	0.15432	0.00801978	0.0245415	0.317003	0.229302	0.92645	0.503583	CNhs11796	CAGE:brain, adult,
1941	2.10362	2.04891	0.0547144	0.746945	0.732582	0.0143638	0.0245969	0.317003	0.0564025	0.695281	0.503582	ENCFF119OVG	CHIP:H3K4me3:middle frontal area 46 female adult (75 years)
4993	0.797935	0.730209	0.0677266	0.32406	0.313223	0.0108371	0.0246002	0.317003	0.174081	0.883374	0.503582	CNhs11824	CAGE:glassy cell carcinoma cell line:HOKUG
1113	3.91236	3.82477	0.0875857	0.803811	0.791253	0.0125585	0.0246228	0.317003	0.222604	0.924212	0.503581	ENCFF175JFX	CHIP:H3K4me3:AG09319
4734	1.18001	1.07114	0.108865	0.409582	0.402508	0.00707418	0.0246862	0.317003	0.0675981	0.707664	0.503579	CNhs10741	CAGE:splenic lymphoma with villous lymphocytes cell line:SLVL
2783	2.4593	2.4672	-0.00790334	0.711049	0.699043	0.012006	0.0247016	0.317003	0.111484	0.798654	0.503578	ENCFF938RYF	CHIP:H3K4me3:A673
4843	0.58317	0.535052	0.0481177	0.243473	0.233365	0.010108	0.0248468	0.318099	0.00894534	0.420589	0.503574	CNhs11266	CAGE:endometrial carcinoma cell line:OMC-2
2354	1.72579	1.80377	-0.0779823	0.653987	0.648414	0.00557292	0.0250286	0.319656	0.0913324	0.792747	0.503568	ENCFF244AQE	CHIP:H3K4me3:neurosphere embryo (15 weeks) originated from ganglionic eminence
4856	0.845379	0.758361	0.0870183	0.313154	0.30019	0.0129636	0.02512	0.31967	0.0440549	0.651183	0.503565	CNhs11280	CAGE:colon carcinoma cell line:CACO-2
4708	2.43234	2.29644	0.135898	0.697522	0.679175	0.0183468	0.0251523	0.31967	0.0625732	0.707664	0.503564	CNhs10647	CAGE:frontal lobe, adult, pool1
4757	0.2835	0.266924	0.0165755	0.137202	0.129763	0.00743884	0.0252102	0.31967	0.110345	0.798654	0.503562	CNhs11974	CAGE:Sertoli Cells,
5282	0.692164	0.653196	0.0389683	0.302111	0.291321	0.01079	0.0253349	0.319754	0.0991466	0.798654	0.503559	CNhs14073	CAGE:occipital cortex, newborn,
5142	1.71043	1.57636	0.134063	0.492617	0.477191	0.0154267	0.0254398	0.319754	0.0176952	0.480818	0.503555	CNhs12554	CAGE:nasal epithelial cells, , tech_
4931	0.895034	0.815806	0.0792281	0.379975	0.368132	0.0118432	0.0254961	0.319754	0.0654258	0.707664	0.503554	CNhs11738	CAGE:gastrointestinal carcinoma cell line:ECC12
4973	0.404084	0.364652	0.0394328	0.198028	0.189305	0.00872271	0.0255156	0.319754	0.172623	0.882451	0.503553	CNhs11788	CAGE:lymph node, adult,
1122	2.82373	2.791	0.0327334	0.652578	0.642366	0.0102127	0.0255177	0.319754	0.270908	0.951616	0.503553	ENCFF770QSA	CHIP:H3K4me3:BJ
5025	1.266	1.14158	0.124417	0.428742	0.415589	0.013153	0.0255993	0.320021	0.0680352	0.707664	0.50355	CNhs11862	CAGE:bronchial squamous cell carcinoma cell line:KNS-62
4950	0.159131	0.144539	0.0145917	0.0899607	0.0846327	0.00532803	0.0260028	0.324303	0.0887717	0.792747	0.503538	CNhs11761	CAGE:blood, adult, pool1
4766	2.08304	1.91275	0.170284	0.587954	0.575174	0.0127798	0.0262631	0.326781	0.043923	0.651183	0.50353	CNhs12003	CAGE:Macrophage - monocyte derived,
5273	2.17451	2.02989	0.144622	0.687048	0.671329	0.0157185	0.0263481	0.327074	0.0931844	0.792747	0.503528	CNhs13809	CAGE:medial temporal gyrus - adult,
4001	3.18287	3.01154	0.171331	1.02017	1.00937	0.0107951	0.026499	0.32818	0.0886851	0.792747	0.503523	ENCFF278HYJ	CHIP:H3K36me3:mesenchymal stem cell originated from H1-hESC
1238	3.61041	3.56146	0.0489507	0.784499	0.772863	0.0116355	0.0267544	0.330573	0.113156	0.799863	0.503516	ENCFF181HKY	CHIP:H3K4me3:WI38 genetically modified using stable transfection treated with 20 nM afimoxifene for 72 hours
39	0.191715	0.18799	0.0037251	0.167599	0.163602	0.00399652	0.02713	0.334435	0.132831	0.825372	0.503505	ENCFF585BKY	DNASE:medulloblastoma
4972	1.21096	1.12801	0.0829539	0.470058	0.456664	0.0133939	0.0275084	0.338315	0.0597298	0.707664	0.503494	CNhs11787	CAGE:occipital lobe, adult,
4989	0.923655	0.841523	0.0821318	0.352204	0.341137	0.011067	0.0276717	0.339537	0.0623211	0.707664	0.503489	CNhs11819	CAGE:gastric adenocarcinoma cell line:MKN45
5235	3.80237	3.64561	0.156758	0.771568	0.761734	0.00983429	0.0277891	0.340193	0.0974519	0.798654	0.503486	CNhs13475	CAGE:CD14+ monocytes - treated with BCG,
5039	0.508497	0.46681	0.0416863	0.22247	0.213432	0.00903787	0.0279056	0.340833	0.111042	0.798654	0.503483	CNhs11880	CAGE:keratoacanthoma cell line:HKA-1
4802	2.23983	2.06665	0.173185	0.603071	0.584487	0.0185832	0.0280243	0.341106	0.0116308	0.4366	0.503479	CNhs12050	CAGE:Synoviocyte,
5101	1.82805	1.69503	0.133019	0.627172	0.609981	0.0171913	0.0280563	0.341106	0.094544	0.797465	0.503478	CNhs12318	CAGE:substantia nigra, adult,
5202	0.762063	0.687418	0.074645	0.297639	0.28775	0.0098893	0.0282887	0.341599	0.0399641	0.631498	0.503472	CNhs13069	CAGE:mesothelioma cell line:Mero-82
5071	2.21677	2.03046	0.18631	0.621129	0.604018	0.0171105	0.0283143	0.341599	0.128778	0.822354	0.503471	CNhs12014	CAGE:Prostate Epithelial Cells,
5120	1.23606	1.11541	0.120647	0.451642	0.440102	0.0115399	0.0283266	0.341599	0.0552808	0.694197	0.503471	CNhs12362	CAGE:testicular germ cell embryonal carcinoma cell line:NEC15
5053	0.633587	0.590016	0.0435714	0.253873	0.244877	0.00899652	0.0284542	0.341599	0.140671	0.840829	0.503467	CNhs11896	CAGE:Gingival epithelial cells, (GEA14)
5080	0.754535	0.698665	0.0558702	0.283507	0.270563	0.0129438	0.0284678	0.341599	0.0816973	0.764134	0.503467	CNhs12092	CAGE:Hepatic Sinusoidal Endothelial Cells,
4716	0.496971	0.444167	0.0528039	0.204214	0.19708	0.00713448	0.0285209	0.341599	0.0631109	0.707664	0.503465	CNhs10722	CAGE:acute myeloid leukemia (FAB M5) cell line:THP-1 (fresh)
4712	1.63688	1.47204	0.164837	0.510334	0.492929	0.0174047	0.0285955	0.341599	0.0494029	0.671299	0.503463	CNhs10651	CAGE:spleen, fetal, pool1
564	0.305254	0.296597	0.00865698	0.198636	0.194837	0.0037993	0.0286236	0.341599	0.0581863	0.7042	0.503462	ENCFF419BLQ	DNASE:kidney embryo (59 days) and female embryo (59 days)
4783	1.23677	1.11979	0.116979	0.403096	0.387869	0.0152269	0.0286756	0.341599	0.0186006	0.486822	0.503461	CNhs10879	CAGE:Keratinocyte - oral,
5275	1.03705	0.954897	0.0821546	0.359897	0.351168	0.00872883	0.0288391	0.342358	0.0398829	0.631498	0.503456	CNhs13915	CAGE:gamma delta positive T cells,
5194	0.731345	0.665954	0.0653912	0.290619	0.281009	0.00961027	0.0288681	0.342358	0.0491516	0.671299	0.503456	CNhs13061	CAGE:mesothelioma cell line:NCI-H28
4675	1.96236	1.80246	0.159906	0.632781	0.615419	0.0173622	0.0291092	0.343889	0.100525	0.798654	0.503449	CNhs10608	CAGE:Clontech Human Universal Reference Total RNA, pool1
5133	0.298266	0.277989	0.0202771	0.138923	0.132421	0.00650209	0.0291677	0.343889	0.0493958	0.671299	0.503447	CNhs12519	CAGE:granulocyte macrophage progenitor,
26	0.162139	0.156239	0.00589959	0.139823	0.136446	0.00337663	0.029269	0.343889	0.0912177	0.792747	0.503445	ENCFF818FXA	DNASE:hepatocyte
4851	0.982498	0.901513	0.0809845	0.361389	0.350289	0.0110996	0.0293145	0.343889	0.0144673	0.4495	0.503443	CNhs11274	CAGE:giant cell carcinoma cell line:LU65
5283	0.715701	0.674892	0.0408094	0.322862	0.312799	0.0100629	0.0294262	0.343889	0.277176	0.958124	0.50344	CNhs14074	CAGE:parietal lobe, newborn,
5312	1.10235	0.998661	0.103685	0.39778	0.386007	0.0117728	0.0294317	0.343889	0.0537831	0.687298	0.50344	CNhs14245	CAGE:lung adenocarcinoma, papillary cell line:NCI-H441
5187	0.857141	0.771525	0.0856162	0.337894	0.328477	0.00941733	0.0294854	0.343889	0.0348623	0.601374	0.503439	CNhs13054	CAGE:acute myeloid leukemia (FAB M1) cell line:HYT-1
172	0.130291	0.123827	0.00646455	0.105283	0.101079	0.00420389	0.0295664	0.343889	0.346606	0.995243	0.503436	ENCFF498QFP	DNASE:caudate nucleus male adult (78 years)
4855	0.238844	0.224202	0.0146423	0.115747	0.111741	0.00400571	0.029628	0.343889	0.0224554	0.518721	0.503435	CNhs11279	CAGE:osteosarcoma cell line:143B/TK^(-)neo^(R)
4830	0.852364	0.781427	0.0709371	0.334032	0.323809	0.0102228	0.0296489	0.343889	0.169699	0.879937	0.503434	CNhs11252	CAGE:squamous cell carcinoma cell line:EC-GI-10
5098	1.61014	1.48726	0.122879	0.571241	0.55336	0.0178816	0.0297217	0.343889	0.0675773	0.707664	0.503432	CNhs12315	CAGE:medulla oblongata, adult,
919	1.05334	1.04378	0.00955546	0.650717	0.643761	0.0069561	0.0298964	0.343889	0.0968015	0.797707	0.503428	ENCFF401DOJ	CHIP:GABPA:H1-hESC
4848	1.15229	1.0432	0.109092	0.407589	0.39394	0.0136489	0.0299061	0.343889	0.109983	0.798654	0.503427	CNhs11271	CAGE:hepatoma cell line:Li-7
4983	1.17474	1.06451	0.110238	0.402452	0.390367	0.0120855	0.0299149	0.343889	0.0680691	0.707664	0.503427	CNhs11810	CAGE:oral squamous cell carcinoma cell line:SAS
4836	0.879858	0.812394	0.0674643	0.334109	0.3253	0.00880897	0.0300402	0.343889	0.21968	0.92063	0.503424	CNhs11258	CAGE:myeloma cell line:PCM6
4707	2.54442	2.40712	0.137294	0.717413	0.698972	0.0184413	0.0300958	0.343889	0.0805541	0.759195	0.503422	CNhs10646	CAGE:insula, adult, pool1
5190	0.909888	0.812916	0.0969718	0.339061	0.329307	0.00975344	0.0300976	0.343889	0.0249279	0.540579	0.503422	CNhs13057	CAGE:acute myeloid leukemia (FAB M4eo) cell line:EoL-3
5041	0.754957	0.683723	0.0712336	0.29673	0.286968	0.00976229	0.0302905	0.34535	0.211281	0.915932	0.503417	CNhs11882	CAGE:adenocarcinoma cell line:IM95m
5248	1.24308	1.16937	0.073716	0.430902	0.423469	0.00743324	0.0303938	0.345787	0.101994	0.798654	0.503414	CNhs13480	CAGE:immature langerhans cells,
4797	0.896391	0.829944	0.0664462	0.318906	0.307298	0.0116076	0.0304806	0.346032	0.100917	0.798654	0.503412	CNhs11061	CAGE:Gingival epithelial cells, (GEA11)
5164	0.335554	0.317451	0.0181035	0.166707	0.158383	0.00832352	0.0307276	0.347291	0.103469	0.798654	0.503406	CNhs12843	CAGE:artery, adult
5238	2.68054	2.51167	0.168866	0.665591	0.655321	0.0102704	0.0307342	0.347291	0.107886	0.798654	0.503405	CNhs13484	CAGE:CD14+ monocytes - mock treated,
5285	0.356453	0.332023	0.0244297	0.188305	0.179965	0.00834075	0.0308475	0.347291	0.216135	0.916533	0.503402	CNhs14076	CAGE:substantia nigra, newborn,
4738	1.14113	1.05312	0.0880102	0.401748	0.390419	0.0113284	0.0308529	0.347291	0.110224	0.798654	0.503402	CNhs10745	CAGE:anaplastic carcinoma cell line:8305C
5059	0.203108	0.193439	0.00966901	0.103588	0.099451	0.00413721	0.0309638	0.347803	0.0893415	0.792747	0.503399	CNhs11931	CAGE:bone marrow stromal cell line:StromaNKtert
5090	0.582614	0.552164	0.0304496	0.239553	0.233853	0.00570002	0.0311643	0.349316	0.0821131	0.764134	0.503394	CNhs13227	CAGE:CD34+ Progenitors,
4844	0.967386	0.887184	0.0802025	0.410906	0.40182	0.00908557	0.031502	0.352358	0.108239	0.798654	0.503385	CNhs11267	CAGE:retinoblastoma cell line:Y79
5009	0.706816	0.643614	0.0632017	0.28545	0.277929	0.00752148	0.0317032	0.353864	0.145225	0.84789	0.50338	CNhs11843	CAGE:hairy cell leukemia cell line:Mo
4911	0.422096	0.390919	0.0311771	0.203122	0.193168	0.00995417	0.0317747	0.353918	0.0693564	0.709473	0.503378	CNhs11677	CAGE:salivary gland, adult, pool1
462	0.201615	0.190068	0.0115475	0.146322	0.140747	0.00557463	0.0318653	0.354084	0.385953	0.999772	0.503376	ENCFF460VUW	DNASE:Ammon's horn male adult (84 years)
4945	0.780773	0.716648	0.0641253	0.340322	0.328076	0.012246	0.0319229	0.354084	0.0860144	0.778526	0.503375	CNhs11755	CAGE:smooth muscle, adult, pool1
3757	2.37823	2.32337	0.0548582	0.954159	0.941289	0.0128699	0.0320451	0.354373	0.0129885	0.438585	0.503372	ENCFF067OGD	CHIP:H3K27me3:chorionic villus male embryo (38 weeks)
4701	2.25099	2.11428	0.136713	0.666718	0.64778	0.0189379	0.0320824	0.354373	0.0323666	0.595343	0.503371	CNhs10640	CAGE:pons, adult, pool1
4804	2.61662	2.41625	0.20037	0.653787	0.635197	0.0185902	0.0322139	0.355088	0.0147164	0.451956	0.503367	CNhs11074	CAGE:Fibroblast - skin spinal muscular atrophy,
5128	1.58351	1.43926	0.144244	0.502418	0.488068	0.0143496	0.0323293	0.355622	0.253526	0.936604	0.503364	CNhs12502	CAGE:amniotic membrane cells,
4676	1.55021	1.40177	0.148445	0.508201	0.491894	0.0163068	0.0324986	0.356746	0.153834	0.861211	0.50336	CNhs10610	CAGE:SABiosciences XpressRef Human Universal Total RNA, pool1
730	2.57073	2.55702	0.0137138	0.828643	0.821268	0.007375	0.0326766	0.357961	0.0932556	0.792747	0.503356	ENCFF546LUX	CHIP:H3K9ac:skeletal muscle myoblast male adult (22 years)
524	0.261331	0.251007	0.0103234	0.188699	0.183385	0.00531393	0.0328234	0.358828	0.207547	0.915932	0.503352	ENCFF225GCE	DNASE:midbrain male adult (78 years) and male adult (84 years)
664	0.172259	0.167651	0.00460765	0.13388	0.130526	0.00335369	0.032992	0.359241	0.110944	0.798654	0.503348	ENCFF658GXI	DNASE:arm bone male embryo (81 day)
5303	1.54349	1.43262	0.11087	0.575559	0.558952	0.0166063	0.0329963	0.359241	0.12041	0.810824	0.503348	CNhs14551	CAGE:thalamus, adult, , tech_
2	0.212045	0.204735	0.00731006	0.177831	0.172993	0.00483838	0.0333093	0.360875	0.144032	0.845533	0.50334	ENCFF880MKD	DNASE:chorion
5156	1.19593	1.07318	0.122758	0.406095	0.397384	0.00871104	0.0333372	0.360875	0.0746382	0.730528	0.503339	CNhs12807	CAGE:plasma cell leukemia cell line:ARH-77
4878	1.98854	1.82032	0.168217	0.55077	0.533119	0.0176501	0.0333654	0.360875	0.0438984	0.651183	0.503339	CNhs12623	CAGE:Bronchial Epithelial Cell,
4761	1.4029	1.29164	0.111266	0.459842	0.447848	0.0119947	0.0334181	0.360875	0.0703501	0.71583	0.503337	CNhs11062	CAGE:Dendritic Cells - monocyte immature derived, , tech_
5014	1.15361	1.048	0.105612	0.411051	0.398359	0.0126924	0.0337703	0.363938	0.116821	0.805021	0.503329	CNhs11849	CAGE:pharyngeal carcinoma cell line:Detroit 562
5204	0.62584	0.570502	0.0553379	0.252984	0.242624	0.0103596	0.034022	0.364766	0.0213408	0.510377	0.503323	CNhs13072	CAGE:mesothelioma cell line:Mero-84
4952	0.494357	0.452049	0.0423077	0.238525	0.22702	0.0115046	0.0340523	0.364766	0.138966	0.838459	0.503322	CNhs11763	CAGE:uterus, fetal,
5245	2.09026	1.87312	0.217139	0.574013	0.556757	0.0172559	0.034053	0.364766	0.0472269	0.666168	0.503322	CNhs13496	CAGE:Hep-2 cells treated with Streptococci strain 5448, biol_
4994	0.754015	0.688726	0.065289	0.293688	0.284146	0.00954196	0.0346543	0.369126	0.0474929	0.666168	0.503308	CNhs11825	CAGE:large cell non-keratinizing squamous carcinoma cell line:SKG-II-SF
2928	3.93591	3.87507	0.0608335	1.03351	1.0204	0.0131067	0.0347459	0.369126	0.053448	0.687298	0.503305	ENCFF684BHN	CHIP:H3K4me3:foreskin melanocyte male newborn
1169	3.17671	3.11884	0.0578728	0.708492	0.697428	0.0110643	0.0348086	0.369126	0.182963	0.89368	0.503304	ENCFF269FSL	CHIP:H3K4me3:cardiac muscle cell
4946	0.372159	0.336571	0.0355881	0.178204	0.169504	0.00870046	0.0348463	0.369126	0.152087	0.860153	0.503303	CNhs11756	CAGE:pancreas, adult,
1544	2.66923	2.60421	0.0650167	0.827875	0.813032	0.0148427	0.0348509	0.369126	0.0989627	0.798654	0.503303	ENCFF065CFJ	CHIP:H3K4me3:cingulate gyrus male adult (81 year)
261	0.286449	0.274958	0.011491	0.19187	0.185866	0.00600405	0.034877	0.369126	0.0647296	0.707664	0.503302	ENCFF378OWK	DNASE:brain female embryo (142 days)
4331	1.99105	1.93141	0.059634	0.755445	0.741923	0.0135217	0.0351238	0.37054	0.0718114	0.71898	0.503296	ENCFF127MNE	CHIP:H3K4me3:lung female embryo (120 days)
4837	0.67281	0.614314	0.0584964	0.275534	0.265987	0.00954649	0.0352347	0.37054	0.0755016	0.730645	0.503294	CNhs11259	CAGE:ductal cell carcinoma cell line:MIA Paca2
4740	1.31273	1.18679	0.125934	0.476953	0.468068	0.00888434	0.0352977	0.37054	0.181214	0.89368	0.503292	CNhs10747	CAGE:non T non B acute lymphoblastic leukemia (ALL) cell line:P30/OHK
216	0.244731	0.235978	0.00875276	0.178633	0.172733	0.00589986	0.03532	0.37054	0.0254375	0.547164	0.503292	ENCFF657KLL	DNASE:brain embryo (112 days)
5027	0.893943	0.794753	0.0991895	0.344443	0.334098	0.0103455	0.0353722	0.37054	0.106715	0.798654	0.503291	CNhs11865	CAGE:chronic myelogenous leukemia (CML) cell line:MEG-A2
5280	0.695197	0.658266	0.036931	0.313011	0.302664	0.0103464	0.035429	0.37054	0.173671	0.882451	0.503289	CNhs14070	CAGE:medial temporal gyrus, newborn,
5044	0.633526	0.573866	0.0596604	0.265549	0.25442	0.0111298	0.0356759	0.372389	0.0966958	0.797707	0.503284	CNhs11885	CAGE:small cell cervical cancer cell line:HCSC-1
5161	0.888569	0.811952	0.0766169	0.350939	0.340511	0.0104279	0.035873	0.373231	0.164271	0.869475	0.503279	CNhs12839	CAGE:merkel cell carcinoma cell line:MS-1
4705	2.29556	2.16786	0.127696	0.671646	0.654287	0.0173591	0.0359144	0.373231	0.0990015	0.798654	0.503278	CNhs10644	CAGE:nucleus accumbens, adult, pool1
5097	1.90504	1.77842	0.126625	0.650015	0.633451	0.016564	0.0359673	0.373231	0.116684	0.805021	0.503277	CNhs12314	CAGE:thalamus, adult,
5281	0.707586	0.669631	0.0379547	0.322223	0.311822	0.0104006	0.0361309	0.374096	0.105647	0.798654	0.503273	CNhs14071	CAGE:caudate nucleus, newborn,
4881	1.31116	1.19546	0.115703	0.406459	0.390281	0.0161777	0.0362299	0.374096	0.0538523	0.687298	0.503271	CNhs11330	CAGE:Renal Proximal Tubular Epithelial Cell,
3033	0.460868	0.448632	0.0122354	0.27977	0.278345	0.00142488	0.0362619	0.374096	0.114926	0.801982	0.50327	ENCFF911RRU	CHIP:EZH2:neural cell
4819	1.50865	1.38248	0.126177	0.43513	0.417541	0.0175898	0.0363485	0.374263	0.00561874	0.417249	0.503268	CNhs11091	CAGE:Smooth Muscle Cells - Umbilical Artery,
741	2.52163	2.50558	0.0160487	0.829859	0.820395	0.00946373	0.0364936	0.37503	0.113461	0.799863	0.503265	ENCFF793JPB	CHIP:H3K4me3:myotube
5114	1.18368	1.07532	0.108353	0.433516	0.419555	0.0139608	0.0366693	0.375469	0.244666	0.928942	0.503261	CNhs12349	CAGE:Hepatocyte,
571	0.354857	0.337386	0.0174713	0.209398	0.20488	0.00451729	0.0366776	0.375469	0.0539438	0.687298	0.503261	ENCFF130BQK	DNASE:femur female embryo (98 days)
745	3.48279	3.40275	0.0800381	0.93348	0.92452	0.00896031	0.0367614	0.375602	0.151168	0.860153	0.503259	ENCFF489CIY	CHIP:H3K4me3:HeLa-S3
1628	5.9241	6.06126	-0.137157	1.16219	1.15479	0.00740409	0.0369397	0.3767	0.051643	0.676031	0.503255	ENCFF556MMP	CHIP:H3K27ac:ACC112
5066	0.818388	0.744247	0.074141	0.304344	0.292466	0.0118779	0.0370237	0.376833	0.15395	0.861211	0.503253	CNhs11945	CAGE:meningioma cell line:HKBMM
3295	1.77488	1.75364	0.0212353	0.652912	0.645421	0.00749069	0.0372049	0.377606	0.183681	0.89368	0.503249	ENCFF700DPA	CHIP:H3K4me3:skeletal muscle myoblast male adult (22 years)
5075	1.39664	1.28515	0.111483	0.470582	0.458269	0.0123123	0.0372418	0.377606	0.0611316	0.707664	0.503248	CNhs12195	CAGE:Dendritic Cells - monocyte immature derived,
4039	2.36419	2.29161	0.0725799	0.928682	0.914942	0.0137401	0.0373364	0.377845	0.139191	0.838459	0.503246	ENCFF424VVO	CHIP:H3K27me3:placenta female embryo (113 days)
4885	1.01668	0.943643	0.0730377	0.340899	0.327715	0.013184	0.0374901	0.378588	0.0421315	0.641389	0.503242	CNhs12091	CAGE:Urothelial Cells,
2353	8.39578	7.8996	0.496177	1.39758	1.38248	0.0151037	0.0376171	0.378588	0.301422	0.977813	0.50324	ENCFF159UNP	CHIP:H3K36me3:regulatory T cell originated from blood cell
1451	3.59693	3.5479	0.0490243	0.977403	0.96716	0.0102422	0.0376463	0.378588	0.0849577	0.774351	0.503239	ENCFF203SHR	CHIP:H3K4me2:skeletal muscle satellite cell female adult originated from mesodermal cell
41	0.17694	0.169631	0.00730811	0.145232	0.141808	0.00342439	0.0377052	0.378588	0.111195	0.798654	0.503238	ENCFF678LXL	DNASE:CD14-positive monocyte female
4736	1.20105	1.08888	0.112164	0.40445	0.392375	0.0120746	0.0377836	0.378588	0.127044	0.821152	0.503236	CNhs10743	CAGE:epidermoid carcinoma cell line:A431
5040	0.925348	0.834574	0.0907747	0.35661	0.346869	0.00974125	0.0378374	0.378588	0.0284443	0.568138	0.503235	CNhs11881	CAGE:anaplastic large cell lymphoma cell line:Ki-JK
5159	1.81644	1.65237	0.16407	0.563896	0.550006	0.0138896	0.0380039	0.379539	0.190347	0.901465	0.503231	CNhs12811	CAGE:salivary acinar cells,
4737	1.05336	0.959056	0.0943071	0.373344	0.367222	0.00612229	0.0382667	0.380955	0.0227068	0.520004	0.503225	CNhs10744	CAGE:b cell line:RPMI1788
4882	1.63887	1.48492	0.153943	0.483705	0.466853	0.0168524	0.0382891	0.380955	0.0687342	0.709309	0.503225	CNhs12728	CAGE:Renal Cortical Epithelial Cells,
3092	2.16048	2.17894	-0.018466	0.711399	0.697865	0.0135335	0.0385392	0.382298	0.0833814	0.767773	0.503219	ENCFF039CCR	CHIP:H3K9ac:neural cell
5178	0.378461	0.353146	0.0253157	0.200683	0.192438	0.00824547	0.0385792	0.382298	0.219718	0.92063	0.503218	CNhs12857	CAGE:heart - tricuspid valve, adult
1235	3.43079	3.4148	0.0159929	0.731155	0.71932	0.0118349	0.0386399	0.382298	0.225728	0.924212	0.503217	ENCFF338EKW	CHIP:H3K4me3:skeletal muscle cell
9	0.201779	0.19258	0.00919841	0.154747	0.149786	0.00496057	0.0388277	0.383442	0.23937	0.928942	0.503213	ENCFF685MZL	DNASE:frontal cortex female adult (67 years) and female adult (80 years)
5269	0.499665	0.465718	0.0339471	0.267186	0.258297	0.00888884	0.0391028	0.385442	0.21957	0.92063	0.503207	CNhs13804	CAGE:pineal gland - adult,
4902	1.05713	0.972218	0.0849158	0.350745	0.333879	0.0168655	0.039299	0.386076	0.025749	0.549416	0.503203	CNhs12017	CAGE:Adipocyte - subcutaneous,
3563	4.49068	4.32753	0.163145	1.14182	1.12712	0.014696	0.0393125	0.386076	0.31269	0.977813	0.503203	ENCFF946TCS	CHIP:H3K27me3:muscle of trunk female embryo (115 days)
5035	1.14461	1.03188	0.112731	0.425211	0.413077	0.0121342	0.0394494	0.386706	0.134042	0.827135	0.5032	CNhs11875	CAGE:choriocarcinoma cell line:SCH
1595	2.28248	2.23405	0.0484302	0.926553	0.914328	0.0122253	0.039562	0.386857	0.127534	0.821729	0.503197	ENCFF087SPC	CHIP:H3K27me3:placental basal plate female embryo (40 weeks)
1	0.199201	0.189846	0.00935504	0.15676	0.151609	0.00515056	0.0396308	0.386857	0.263829	0.94775	0.503196	ENCFF110QGM	DNASE:frontal cortex male adult (27 years) and male adult (35 years)
3613	0.980534	0.982711	-0.00217652	0.508667	0.505803	0.00286406	0.0396833	0.386857	0.0447832	0.651872	0.503195	ENCFF937JUR	CHIP:H3K9ac:mesenchymal stem cell originated from H1-hESC
4863	0.924877	0.838849	0.0860285	0.333258	0.321197	0.0120606	0.0401987	0.390806	0.0162599	0.464508	0.503184	CNhs11287	CAGE:oral squamous cell carcinoma cell line:HO-1-u-1
5064	0.691992	0.6396	0.0523918	0.296823	0.287091	0.0097324	0.0403007	0.390806	0.0896187	0.792747	0.503182	CNhs11943	CAGE:breast carcinoma cell line:MCF7
4852	0.775625	0.711344	0.0642811	0.290211	0.279675	0.0105365	0.0403394	0.390806	0.0903587	0.792747	0.503181	CNhs11275	CAGE:lung adenocarcinoma cell line:A549
4692	1.82645	1.6543	0.172148	0.569255	0.553472	0.0157835	0.0404527	0.390806	0.109375	0.798654	0.503178	CNhs10630	CAGE:small intestine, adult, pool1
5152	1.51656	1.41324	0.103321	0.552785	0.537415	0.0153699	0.0404561	0.390806	0.0477348	0.667409	0.503178	CNhs12611	CAGE:olfactory region, adult
452	0.179432	0.17454	0.00489157	0.133306	0.131173	0.00213359	0.0410238	0.395571	0.0556797	0.694197	0.503166	ENCFF775FBE	DNASE:liver female embryo (101 day) and female embryo (113 days)
1225	3.29171	3.24173	0.0499716	0.812044	0.803325	0.00871938	0.0411274	0.395731	0.152159	0.860153	0.503164	ENCFF840SHA	CHIP:H3K4me3:Panc1
3328	3.10624	3.18161	-0.0753644	0.812208	0.798883	0.0133258	0.0412218	0.395731	0.0639565	0.707664	0.503162	ENCFF864VYP	CHIP:H3K4me3:neural cell
403	0.268528	0.25304	0.015488	0.17387	0.167325	0.00654544	0.0412639	0.395731	0.0673798	0.707664	0.503162	ENCFF468SMI	DNASE:brain male embryo (72 days) and male embryo (76 days)
5221	0.200101	0.190435	0.00966668	0.129802	0.124263	0.00553823	0.0414509	0.396808	0.209604	0.915932	0.503158	CNhs13435	CAGE:achilles tendon,
5292	0.38181	0.358423	0.0233867	0.198153	0.190784	0.00736958	0.0415395	0.396941	0.204655	0.912198	0.503156	CNhs14083	CAGE:putamen, newborn,
5172	0.999354	0.926054	0.0733001	0.46113	0.448898	0.0122323	0.041618	0.396978	0.490001	0.999772	0.503154	CNhs12851	CAGE:seminal vesicle, adult
1161	3.12793	3.12181	0.00612283	0.685231	0.673163	0.0120679	0.0417374	0.397403	0.0818745	0.764134	0.503152	ENCFF072YMW	CHIP:H3K4me3:astrocyte of the cerebellum
469	0.334529	0.316259	0.0182703	0.200258	0.193371	0.00688653	0.0418628	0.397883	0.127205	0.821192	0.503149	ENCFF641HVS	DNASE:brain embryo (56 days) and male embryo (58 days)
552	0.303381	0.284613	0.018768	0.198562	0.191404	0.00715771	0.0420039	0.398015	0.0634259	0.707664	0.503146	ENCFF328BAN	DNASE:globus pallidus male adult (78 years) and male adult (84 years)
5231	0.635465	0.601331	0.0341337	0.282192	0.271934	0.0102575	0.0420264	0.398015	0.244167	0.928942	0.503146	CNhs13454	CAGE:skeletal muscle - soleus muscle,
1897	1.27324	1.24651	0.0267309	0.593261	0.582269	0.0109918	0.0422819	0.399722	0.0536999	0.687298	0.503141	ENCFF942CMQ	CHIP:H3K4me3:brain male embryo (122 days)
4990	0.640158	0.579971	0.0601864	0.268862	0.258977	0.00988448	0.0423602	0.399751	0.0756361	0.730645	0.503139	CNhs11820	CAGE:choriocarcinoma cell line:T3M-3
2212	1.5225	1.50919	0.0133088	0.783131	0.77869	0.00444031	0.0424976	0.400337	0.0221904	0.51634	0.503136	ENCFF535QFN	CHIP:PRPF4:HepG2
4082	2.19202	2.14876	0.0432527	0.904893	0.893655	0.0112388	0.0427247	0.401764	0.218841	0.920587	0.503132	ENCFF087PEW	CHIP:H3K27me3:chorionic villus female embryo (40 weeks)
2206	1.90949	1.86204	0.0474563	0.863229	0.852751	0.010478	0.0431931	0.40545	0.242742	0.928942	0.503123	ENCFF933EFO	CHIP:H3K27me3:chorion female embryo (40 weeks)
3763	0.960411	0.959562	0.000848949	0.392153	0.389337	0.00281602	0.0433158	0.405551	0.187081	0.89627	0.50312	ENCFF180DCO	CHIP:H3K4me3:prostate male adult (54 years)
278	0.182251	0.173406	0.00884463	0.138184	0.13345	0.00473489	0.043409	0.405551	0.232104	0.927634	0.503118	ENCFF151SBP	DNASE:medulla oblongata male adult (78 years) and male adult (84 years)
4934	0.9447	0.864886	0.0798141	0.363777	0.357389	0.00638801	0.0434328	0.405551	0.115411	0.802592	0.503118	CNhs11741	CAGE:diffuse large B-cell lymphoma cell line:CTB-1
111	0.440212	0.440113	9.93311e-05	0.235549	0.232838	0.00271118	0.0440611	0.410696	0.101923	0.798654	0.503105	ENCFF655AEV	DNASE:fibroblast of lung
4741	1.18355	1.06862	0.114937	0.403303	0.391911	0.0113924	0.0441814	0.411096	0.174702	0.883816	0.503103	CNhs10748	CAGE:epidermoid carcinoma cell line:Ca Ski
4360	2.81801	2.75295	0.0650625	1.05676	1.04367	0.0130911	0.0442776	0.411271	0.10858	0.798654	0.503101	ENCFF196AMW	CHIP:H3K27me3:chorionic villus embryo (16 weeks)
5199	0.692642	0.629426	0.0632163	0.264625	0.254429	0.0101965	0.0446123	0.413657	0.00857838	0.417249	0.503095	CNhs13066	CAGE:mesothelioma cell line:Mero-25
1303	0.892984	0.881808	0.0111763	0.493757	0.487563	0.00619313	0.0451091	0.417535	0.316469	0.977905	0.503085	ENCFF348USU	CHIP:BHLHE40:HepG2
4828	0.879713	0.792876	0.0868371	0.344516	0.335433	0.00908351	0.0453011	0.418054	0.083239	0.767773	0.503081	CNhs11250	CAGE:chronic myelogenous leukemia cell line:K562
4747	1.19525	1.11494	0.0803027	0.367891	0.353535	0.0143558	0.0453226	0.418054	0.0487379	0.671299	0.503081	CNhs11309	CAGE:Smooth Muscle Cells - Aortic,
4883	1.47699	1.34464	0.132352	0.44986	0.434104	0.015756	0.0457668	0.419845	0.046338	0.663596	0.503073	CNhs11332	CAGE:Renal Epithelial Cells,
1604	3.57329	3.43103	0.142261	1.14401	1.13074	0.0132763	0.045779	0.419845	0.296582	0.973973	0.503072	ENCFF500LDJ	CHIP:H3K4me1:middle frontal area 46 male adult (81 year)
5019	0.832529	0.758825	0.0737036	0.330739	0.321062	0.00967762	0.0458225	0.419845	0.0164277	0.46659	0.503072	CNhs11856	CAGE:pagetoid sarcoma cell line:Hs 925.T
5146	0.408196	0.376147	0.0320488	0.182811	0.174505	0.00830595	0.0461149	0.419845	0.202225	0.912198	0.503066	CNhs12574	CAGE:nasal epithelial cells,
583	0.24166	0.229736	0.0119244	0.171872	0.166255	0.00561664	0.0461279	0.419845	0.234754	0.928702	0.503066	ENCFF210SQU	DNASE:pons male adult (78 years)
4842	0.887643	0.816466	0.0711774	0.342664	0.331723	0.0109401	0.0461304	0.419845	0.0556718	0.694197	0.503066	CNhs11265	CAGE:bile duct carcinoma cell line:TFK-1
1452	3.6579	3.63883	0.0190659	1.04172	1.03179	0.00993431	0.0461731	0.419845	0.338388	0.993538	0.503065	ENCFF663RRL	CHIP:H3K27ac:IMR-90
4970	0.0483717	0.0454813	0.00289042	0.0357185	0.0332776	0.0024409	0.0462057	0.419845	0.309653	0.977813	0.503064	CNhs11785	CAGE:skin, adult,
5234	0.306437	0.293815	0.012622	0.196441	0.188117	0.00832407	0.0464475	0.419845	0.213276	0.915932	0.50306	CNhs13464	CAGE:Urethra,
611	0.323567	0.313955	0.00961271	0.203793	0.200761	0.00303164	0.0464999	0.419845	0.107887	0.798654	0.503059	ENCFF248ZTQ	DNASE:kidney female embryo (76 days) and male embryo (76 days)
19	0.258496	0.252119	0.00637755	0.189162	0.185027	0.00413521	0.0465152	0.419845	0.123114	0.81195	0.503059	ENCFF153XQL	DNASE:H1-hESC
3045	5.13401	4.869	0.265012	1.15578	1.13948	0.0162989	0.0465269	0.419845	0.18158	0.89368	0.503058	ENCFF273QJO	CHIP:H3K4me1:muscle of trunk female embryo (115 days)
1160	2.86959	2.8552	0.0143957	0.662954	0.652563	0.0103909	0.0465441	0.419845	0.240609	0.928942	0.503058	ENCFF510YMH	CHIP:H3K4me3:astrocyte of the spinal cord
5241	2.98704	2.86751	0.119524	0.690762	0.683051	0.0077104	0.0467285	0.420501	0.0773126	0.741294	0.503055	CNhs13493	CAGE:CD14+ monocytes - treated with Salmonella,
1204	1.95506	1.95442	0.000634551	0.566773	0.561343	0.00542998	0.0468426	0.420501	0.156712	0.864948	0.503052	ENCFF669KWL	CHIP:H3K4me3:endothelial cell of umbilical vein male newborn
4754	1.02365	0.937259	0.0863956	0.341564	0.327462	0.014102	0.0468543	0.420501	0.0215921	0.511527	0.503052	CNhs11951	CAGE:Sebocyte,
4949	1.05644	0.966424	0.0900128	0.420198	0.404828	0.0153698	0.047061	0.421173	0.151071	0.860153	0.503048	CNhs11760	CAGE:aorta, adult, pool1
4966	0.365566	0.331124	0.0344424	0.191191	0.181756	0.0094353	0.0470876	0.421173	0.183574	0.89368	0.503048	CNhs11780	CAGE:colon, fetal,
5022	1.41442	1.25887	0.155551	0.478179	0.466262	0.0119163	0.0472444	0.421865	0.152622	0.860256	0.503045	CNhs11859	CAGE:leukemia, chronic megakaryoblastic cell line:MEG-01
4789	1.10284	0.990868	0.111969	0.368523	0.355736	0.0127867	0.0474191	0.422374	0.0608953	0.707664	0.503042	CNhs11046	CAGE:embryonic kidney cell line: HEK293/SLAM untreated
1988	3.77207	3.71828	0.0537901	0.885665	0.87745	0.00821459	0.0475395	0.422374	0.236373	0.928942	0.50304	ENCFF927LSQ	CHIP:H3K4me3:foreskin keratinocyte male newborn
1220	3.65864	3.5662	0.0924344	0.801898	0.789753	0.012145	0.04754	0.422374	0.308435	0.977813	0.503039	ENCFF442WNT	CHIP:H3K4me3:foreskin fibroblast male newborn
4967	0.860289	0.780102	0.0801873	0.373101	0.360501	0.0126002	0.0476242	0.422416	0.225435	0.924212	0.503038	CNhs12997	CAGE:duodenum, fetal, , tech_
5087	0.2199	0.212942	0.00695775	0.109021	0.104685	0.00433571	0.0481928	0.426386	0.0391563	0.622866	0.503028	CNhs12191	CAGE:mesodermal tumor cell line:HIRS-BM
3102	2.58203	2.51952	0.06251	0.815918	0.800994	0.0149246	0.0482322	0.426386	0.07139	0.71898	0.503027	ENCFF941AKN	CHIP:H3K4me3:angular gyrus male adult (81 year)
4985	0.982603	0.887926	0.0946764	0.388813	0.376259	0.0125542	0.0483209	0.42646	0.149232	0.858764	0.503025	CNhs11812	CAGE:small cell lung carcinoma cell line:WA-hT
5304	1.16839	1.08833	0.0800558	0.455648	0.442369	0.0132789	0.0484427	0.426826	0.0928884	0.792747	0.503023	CNhs14618	CAGE:putamen, adult, , tech_
5049	1.20904	1.08269	0.126348	0.40092	0.391327	0.00959331	0.0487619	0.428161	0.113114	0.799863	0.503017	CNhs11891	CAGE:hereditary spherocytic anemia cell line:WIL2-NS
22	0.203633	0.196473	0.00716047	0.154049	0.150506	0.00354303	0.0487945	0.428161	0.0823241	0.764134	0.503017	ENCFF082SFS	DNASE:heart male adult (27 years) and male adult (35 years)
2153	0.803299	0.814206	-0.0109069	0.508304	0.505825	0.00247985	0.048836	0.428161	0.170903	0.8808	0.503016	ENCFF549BUB	CHIP:BRCA1:K562
4170	2.39813	2.31472	0.0834107	0.818188	0.802232	0.0159562	0.0489363	0.428306	0.059742	0.707664	0.503014	ENCFF680BLM	CHIP:H3K4me3:substantia nigra male adult (81 year)
5081	1.07349	1.01921	0.0542861	0.353902	0.3472	0.00670183	0.0490138	0.428306	0.215372	0.916533	0.503013	CNhs12179	CAGE:CD19+ B Cells (pluriselect), , donation2
2338	2.64063	2.62546	0.015168	0.866566	0.855874	0.0106922	0.0493651	0.43015	0.310391	0.977813	0.503006	ENCFF014YCW	CHIP:H3K4me3:SK-N-MC
5246	1.8563	1.66366	0.192642	0.528112	0.511806	0.0163064	0.0494216	0.43015	0.0831994	0.767773	0.503005	CNhs13498	CAGE:Hep-2 cells treated with Streptococci strain JRS4, biol_
1499	5.89406	5.62901	0.265049	1.30116	1.28434	0.0168153	0.0494677	0.43015	0.0922393	0.792747	0.503005	ENCFF186CZK	CHIP:H3K27ac:middle frontal area 46 female adult (75 years)
268	0.218895	0.215108	0.0037867	0.163585	0.161562	0.00202303	0.0495717	0.43035	0.252464	0.936604	0.503003	ENCFF340RUK	DNASE:Peyer's patch male adult (54 years)
2724	1.35843	1.34334	0.0150917	0.728496	0.719938	0.00855881	0.0497319	0.430787	0.366112	0.999671	0.503	ENCFF222RPJ	CHIP:KDM1A:H1-hESC
5185	0.665429	0.599522	0.0659062	0.27307	0.265475	0.00759536	0.0497842	0.430787	0.126474	0.81946	0.502999	CNhs13052	CAGE:acute myeloid leukemia (FAB M2) cell line:Kasumi-6
1739	4.67129	4.46265	0.20864	1.28987	1.27656	0.0133082	0.0499997	0.431949	0.0548645	0.692086	0.502995	ENCFF614MKK	CHIP:H3K4me1:brain female embryo (120 days)
2493	2.4225	2.35753	0.0649686	0.743897	0.736897	0.00700057	0.0504719	0.434796	0.276446	0.957713	0.502987	ENCFF913SUG	CHIP:H3K4me3:HeLa-S3
662	0.25015	0.238273	0.0118769	0.175059	0.168872	0.00618681	0.0505419	0.434796	0.397855	0.999772	0.502986	ENCFF217JVN	DNASE:spinal cord female embryo (87 days)
1859	2.30366	2.2766	0.0270631	0.624648	0.612557	0.0120916	0.0506217	0.434796	0.143029	0.844069	0.502984	ENCFF362YRX	CHIP:H3K4me3:muscle of leg female embryo (110 days)
5243	2.52093	2.43986	0.0810657	0.60072	0.593282	0.00743771	0.0507396	0.434796	0.124225	0.814376	0.502982	CNhs13488	CAGE:CD14+ monocytes - treated with Candida,
4891	1.18496	1.08213	0.102832	0.383312	0.369239	0.014073	0.0508023	0.434796	0.105801	0.798654	0.502981	CNhs12125	CAGE:Amniotic Epithelial Cells,
832	3.3848	3.32891	0.0558972	0.868956	0.860138	0.00881749	0.0508203	0.434796	0.193394	0.903571	0.502981	ENCFF644KJR	CHIP:H3K4me3:osteoblast
4403	0.461653	0.465044	-0.00339183	0.315716	0.312571	0.00314495	0.0510874	0.436027	0.0879909	0.790946	0.502976	ENCFF142LSJ	CHIP:CTCF:ascending aorta female adult (51 year)
4984	1.16234	1.05813	0.104209	0.444862	0.433495	0.0113668	0.0511628	0.436027	0.12477	0.814376	0.502975	CNhs11811	CAGE:neuroblastoma cell line:NH-12
4936	0.933398	0.858555	0.0748429	0.419459	0.40755	0.0119092	0.0512196	0.436027	0.0379747	0.614246	0.502974	CNhs11744	CAGE:neuroectodermal tumor cell line:FU-RPNT-1
2726	1.76154	1.70762	0.0539284	0.570057	0.562364	0.00769264	0.0512937	0.436027	0.358931	0.998964	0.502973	ENCFF374VXQ	CHIP:H3K4me3:placenta female embryo (113 days)
4875	0.542876	0.507688	0.0351881	0.216175	0.206472	0.00970258	0.0513745	0.436027	0.229398	0.92645	0.502971	CNhs12083	CAGE:Esophageal Epithelial Cells,
5165	0.851036	0.768518	0.082518	0.331464	0.317528	0.0139363	0.0518014	0.437962	0.142934	0.844069	0.502964	CNhs12844	CAGE:vein, adult
3590	1.13518	1.10676	0.0284237	0.5488	0.54154	0.00725943	0.0518228	0.437962	0.469514	0.999772	0.502963	ENCFF404RAR	CHIP:H3K27me3:neural stem progenitor cell originated from H1-hESC
669	0.221873	0.214279	0.007594	0.171109	0.166247	0.00486261	0.0520087	0.437962	0.417365	0.999772	0.50296	ENCFF848BGL	DNASE:inferior parietal cortex male adult (84 years)
5139	0.742653	0.712919	0.0297337	0.262091	0.259336	0.00275484	0.0520407	0.437962	0.067611	0.707664	0.50296	CNhs12549	CAGE:Eosinophils,
4080	3.15669	2.99267	0.164025	0.69457	0.686012	0.00855815	0.0520481	0.437962	0.273609	0.951988	0.50296	ENCFF438NJV	CHIP:H3K4me3:CD4-positive, alpha-beta T cell male adult (21 year)
5007	0.727371	0.657893	0.069478	0.289975	0.280224	0.00975132	0.0521371	0.437962	0.315561	0.977905	0.502958	CNhs11841	CAGE:bronchogenic carcinoma cell line:ChaGo-K-1
4764	3.36749	3.1688	0.198685	0.809139	0.798377	0.0107622	0.0521795	0.437962	0.433603	0.999772	0.502957	CNhs11957	CAGE:Natural Killer Cells,
5095	1.64445	1.54296	0.101494	0.60469	0.590258	0.0144327	0.0524088	0.438593	0.176435	0.884971	0.502953	CNhs12311	CAGE:amygdala, adult,
2679	2.05874	1.9838	0.0749422	0.8321	0.81731	0.0147898	0.0524198	0.438593	0.105535	0.798654	0.502953	ENCFF615KRJ	CHIP:H3K27me3:MM.1S
199	0.388043	0.369625	0.0184183	0.229565	0.22399	0.00557467	0.0530535	0.443134	0.110271	0.798654	0.502943	ENCFF581JDF	DNASE:muscle of back female embryo (98 days)
5094	2.40436	2.2657	0.138651	0.748316	0.732788	0.0155277	0.0531294	0.443134	0.16221	0.867897	0.502941	CNhs12310	CAGE:medial frontal gyrus, adult,
4172	2.76859	2.71676	0.0518248	0.768484	0.757411	0.0110728	0.0533977	0.444674	0.211924	0.915932	0.502937	ENCFF136PJT	CHIP:H3K4me3:endocrine pancreas adult (59 years)
4720	0.787781	0.698141	0.0896398	0.294196	0.284915	0.00928095	0.0535055	0.444874	0.0955645	0.797707	0.502935	CNhs10727	CAGE:chronic myelogenous leukemia cell line:KU812
1202	2.97547	2.97493	0.000541449	0.737863	0.727318	0.0105455	0.0539531	0.447235	0.252908	0.936604	0.502927	ENCFF405LBE	CHIP:H3K4me3:retinal pigment epithelial cell
355	0.224585	0.215929	0.00865607	0.171205	0.166257	0.00494757	0.0539578	0.447235	0.26979	0.951177	0.502927	ENCFF029ZOX	DNASE:superior temporal gyrus male adult (84 years)
1118	2.68736	2.71173	-0.0243754	0.743326	0.732437	0.0108895	0.0542016	0.448468	0.202376	0.912198	0.502923	ENCFF314PWW	CHIP:H3K4me3:BE2C
5047	0.913064	0.84657	0.0664948	0.435612	0.427732	0.0078792	0.0543648	0.448468	0.13996	0.840829	0.502921	CNhs11889	CAGE:anaplastic squamous cell carcinoma cell line:RPMI 2650
5058	0.890997	0.811716	0.0792807	0.337754	0.326435	0.0113195	0.0543942	0.448468	0.0444961	0.651183	0.50292	CNhs11930	CAGE:clear cell carcinoma cell line:TEN
5215	2.42946	2.28837	0.141098	0.603024	0.592868	0.0101565	0.0544466	0.448468	0.213518	0.915932	0.502919	CNhs13208	CAGE:CD14+CD16+ Monocytes,
270	0.3364	0.322539	0.0138613	0.203213	0.200396	0.00281739	0.0545425	0.448468	0.0818929	0.764134	0.502918	ENCFF978RWQ	DNASE:stomach female embryo (98 days)
3457	3.57792	3.46608	0.111847	0.946344	0.940058	0.0062868	0.0546867	0.448468	0.163522	0.868863	0.502915	ENCFF087KLN	CHIP:H3K27ac:small intestine female adult (30 years)
5084	1.60364	1.49723	0.106419	0.458205	0.44903	0.00917447	0.0546974	0.448468	0.238323	0.928942	0.502915	CNhs12178	CAGE:CD8+ T Cells (pluriselect), , donation2
1042	1.14573	1.14225	0.00348532	0.602555	0.599515	0.00303966	0.0549683	0.449995	0.0660219	0.707664	0.502911	ENCFF165UOQ	CHIP:JUND:A549 treated with 0.02% ethanol for 1 hour
3915	2.73279	2.61312	0.119679	0.672344	0.665906	0.00643849	0.0552979	0.450946	0.0716305	0.71898	0.502905	ENCFF039MOH	CHIP:H3K4me3:CD8-positive, alpha-beta T cell male adult (21 year)
2457	4.17812	4.09583	0.0822906	1.18115	1.17513	0.00602758	0.0553303	0.450946	0.0987238	0.798654	0.502905	ENCFF439FMZ	CHIP:H3K4me1:small intestine male embryo (108 days)
2450	0.882164	0.863256	0.0189076	0.517326	0.512282	0.00504339	0.0554187	0.450946	0.156085	0.864526	0.502903	ENCFF802RZV	CHIP:H3K9me3:muscle layer of colon female adult (77 years)
1622	1.64212	1.60142	0.0407075	0.672896	0.662736	0.0101601	0.055424	0.450946	0.425581	0.999772	0.502903	ENCFF797WZE	CHIP:H3K4me3:angular gyrus female adult (75 years)
651	0.304329	0.299321	0.0050087	0.196834	0.194135	0.00269893	0.0556955	0.451069	0.0534048	0.687298	0.502899	ENCFF220BQY	DNASE:Peyer's patch male adult (37 years)
4954	0.140709	0.131667	0.00904213	0.0875807	0.0814729	0.00610778	0.0557918	0.451069	0.148029	0.858764	0.502897	CNhs11765	CAGE:umbilical cord, fetal,
2240	3.72977	3.57738	0.152392	1.17003	1.15669	0.0133413	0.0558878	0.451069	0.296557	0.973973	0.502896	ENCFF599AVS	CHIP:H3K4me1:middle frontal area 46 female adult (75 years)
5105	2.39341	2.23595	0.157461	0.747053	0.730111	0.0169421	0.0560391	0.451069	0.221112	0.922833	0.502893	CNhs14550	CAGE:locus coeruleus, adult,
4289	5.18342	4.98219	0.201236	1.35621	1.34129	0.0149205	0.0561001	0.451069	0.0783386	0.747241	0.502892	ENCFF273YMG	CHIP:H3K27me3:T-cell male adult (37 years)
3182	0.606336	0.574687	0.0316494	0.375084	0.369705	0.00537962	0.0561581	0.451069	0.18908	0.901457	0.502891	ENCFF437RZA	CHIP:H3K36me3:testis male adult (37 years)
876	0.964878	0.953738	0.0111402	0.556182	0.554152	0.00202996	0.0561928	0.451069	0.0975271	0.798654	0.502891	ENCFF535BIH	CHIP:PBX3:GM12878
4928	0.488171	0.455987	0.0321847	0.229181	0.220301	0.00888009	0.0562274	0.451069	0.143114	0.844069	0.50289	CNhs11734	CAGE:small-cell gastrointestinal carcinoma cell line:ECC4
1842	1.66876	1.67799	-0.00922191	0.754983	0.748547	0.00643617	0.0562319	0.451069	0.0513299	0.676031	0.50289	ENCFF575IJZ	CHIP:H2AFZ:IMR-90
2467	2.69955	2.662	0.0375471	0.775194	0.766879	0.00831461	0.0562881	0.451069	0.21928	0.92063	0.502889	ENCFF144ZRX	CHIP:H3K4me3:HCT116
4867	0.77008	0.711154	0.058926	0.295255	0.281596	0.0136596	0.0564061	0.451289	0.0805921	0.759195	0.502887	CNhs11303	CAGE:Melanocyte - light,
5255	2.06558	1.92013	0.145454	0.603747	0.591008	0.0127383	0.0565271	0.451289	0.114986	0.801982	0.502885	CNhs13547	CAGE:migratory langerhans cells,
4350	2.63105	2.48048	0.15057	0.857785	0.847856	0.00992894	0.0565705	0.451289	0.324743	0.985919	0.502885	ENCFF943RRM	CHIP:H3K36me3:CD8-positive, alpha-beta memory T cell
338	0.253878	0.241318	0.0125594	0.170631	0.165321	0.00531028	0.0568821	0.453095	0.0554701	0.694197	0.50288	ENCFF003FBE	DNASE:brain female embryo (109 days)
2591	2.33157	2.24978	0.0817909	0.816299	0.808558	0.00774044	0.0571197	0.454307	0.159472	0.867001	0.502876	ENCFF429LOR	CHIP:H3K9ac:colonic mucosa female adult (73 years)
4340	0.934836	0.911116	0.0237204	0.588743	0.580232	0.00851172	0.0573349	0.454933	0.0817303	0.764134	0.502873	ENCFF038BSL	CHIP:H2BK12ac:neural stem progenitor cell originated from H1-hESC
5252	0.634705	0.570003	0.0647014	0.253708	0.245509	0.0081984	0.0573696	0.454933	0.302498	0.977813	0.502872	CNhs13505	CAGE:acute myeloid leukemia (FAB M6) cell line:F-36P
3443	6.28665	5.92296	0.363686	1.33072	1.31871	0.0120128	0.0576472	0.456116	0.132674	0.825372	0.502868	ENCFF260CLC	CHIP:H3K36me3:thymus female embryo (110 days)
4189	6.2566	5.90394	0.352659	1.41461	1.40161	0.0130061	0.0576905	0.456116	0.208795	0.915932	0.502867	ENCFF513MJF	CHIP:H3K36me3:foreskin fibroblast male newborn
3919	5.44312	5.21379	0.229326	1.37429	1.35954	0.0147417	0.0580046	0.457917	0.40945	0.999772	0.502862	ENCFF909HXM	CHIP:H3K4me1:layer of hippocampus male adult (73 years)
5158	1.33935	1.20131	0.138036	0.495824	0.484151	0.0116732	0.0581829	0.458213	0.182429	0.89368	0.502859	CNhs12809	CAGE:small cell lung carcinoma cell line:NCI-H82
471	0.18518	0.181727	0.00345285	0.149297	0.145855	0.00344241	0.0582145	0.458213	0.253294	0.936604	0.502859	ENCFF080JZX	DNASE:adrenal gland female adult (53 years)
2006	0.431891	0.418926	0.0129647	0.315755	0.31095	0.00480515	0.0585753	0.460371	0.452805	0.999772	0.502853	ENCFF448GLM	CHIP:H3K27me3:esophagus muscularis mucosa female adult (53 years)
2912	2.08099	2.02603	0.0549593	0.745607	0.732743	0.0128641	0.0586684	0.460421	0.11056	0.798654	0.502852	ENCFF402HML	CHIP:H3K4me3:temporal lobe female adult (75 years)
4767	2.03483	1.93038	0.104448	0.580508	0.575071	0.00543636	0.0592863	0.464256	0.171738	0.882442	0.502842	CNhs10862	CAGE:Neutrophils,
4090	3.40375	3.3672	0.0365417	1.05949	1.05155	0.00794125	0.0593735	0.464256	0.0460207	0.661728	0.502841	ENCFF686SJS	CHIP:H3K27me3:spinal cord female embryo (108 days)
5008	0.787096	0.705291	0.0818056	0.28961	0.279559	0.0100512	0.0594677	0.464256	0.0416323	0.641389	0.502839	CNhs11842	CAGE:fibrous histiocytoma cell line:GCT TIB-223
3656	1.97142	1.96165	0.00977159	0.626731	0.617331	0.00939935	0.0597036	0.464256	0.130662	0.822743	0.502836	ENCFF257DIP	CHIP:H3K4me3:muscle of trunk female embryo (115 days)
3325	2.87888	2.79961	0.0792701	0.761589	0.750863	0.0107265	0.0597465	0.464256	0.087912	0.790946	0.502835	ENCFF078OGK	CHIP:H3K4me3:esophagus muscularis mucosa female adult (53 years)
4715	1.61734	1.46166	0.155681	0.517634	0.501961	0.0156729	0.0598221	0.464256	0.0684723	0.709149	0.502834	CNhs10654	CAGE:tonsil, adult, pool1
4513	3.80627	3.73017	0.0761037	1.12704	1.12142	0.00562513	0.05991	0.464256	0.0848004	0.774351	0.502833	ENCFF177LLX	CHIP:H3K4me1:large intestine male embryo (108 days)
3851	3.59716	3.43807	0.159094	0.948588	0.938264	0.0103247	0.0599231	0.464256	0.264426	0.948611	0.502832	ENCFF291OIO	CHIP:H3K27ac:thymus female embryo (110 days)
2253	1.51427	1.46687	0.0474038	0.582095	0.573459	0.008636	0.0599434	0.464256	0.14968	0.858764	0.502832	ENCFF513SIP	CHIP:H3K4me3:vagina female adult (53 years)
4961	0.821059	0.740474	0.0805854	0.340427	0.327411	0.0130155	0.0600729	0.464581	0.213224	0.915932	0.50283	CNhs11773	CAGE:small intestine, fetal,
4962	0.48192	0.442461	0.0394595	0.242073	0.231265	0.0108072	0.0602475	0.465255	0.0980842	0.798654	0.502827	CNhs11774	CAGE:skin, fetal,
3032	2.74173	2.6663	0.075429	0.7542	0.74339	0.0108104	0.0608564	0.468956	0.101888	0.798654	0.502818	ENCFF435XKF	CHIP:H3K4me3:gastroesophageal sphincter female adult (53 years)
4785	1.07535	0.973013	0.10234	0.38781	0.374888	0.0129222	0.0609034	0.468956	0.213857	0.916147	0.502817	CNhs10882	CAGE:Prostate Epithelial Cells (polarized),
1402	2.32026	2.30315	0.0171185	0.91017	0.901539	0.00863141	0.0610066	0.469071	0.317578	0.979276	0.502816	ENCFF865WLD	CHIP:H3K9ac:NT2/D1
323	0.471878	0.442929	0.0289496	0.218409	0.213531	0.00487851	0.0612164	0.469966	0.36472	0.999671	0.502813	ENCFF468PTJ	DNASE:CD8-positive, alpha-beta T cell male adult (37 years)
4758	3.69693	3.54461	0.152322	0.791182	0.783153	0.00802827	0.0612999	0.469966	0.207093	0.915932	0.502811	CNhs10852	CAGE:CD14+ Monocytes,
5191	0.867415	0.771576	0.0958395	0.309497	0.300056	0.00944164	0.0616296	0.471813	0.10908	0.798654	0.502807	CNhs13058	CAGE:acute myeloid leukemia (FAB M5) cell line:U-937 DE-4
557	0.296473	0.286181	0.0102928	0.200606	0.194314	0.006292	0.0621162	0.474417	0.100878	0.798654	0.502799	ENCFF540MDC	DNASE:eye embryo (56 days) and male embryo (76 days)
3452	1.14037	1.14867	-0.0082978	0.486518	0.479213	0.0073055	0.0622111	0.474417	0.222357	0.924212	0.502798	ENCFF852WXE	CHIP:H3K4me3:cardiac muscle cell
657	0.230144	0.224125	0.0060194	0.157432	0.153885	0.00354724	0.0622377	0.474417	0.401872	0.999772	0.502797	ENCFF417MBH	DNASE:neural progenitor cell originated from H9
1212	2.99244	2.93699	0.0554545	0.767337	0.7547	0.0126373	0.0623746	0.47478	0.296286	0.973973	0.502795	ENCFF315WID	CHIP:H3K4me3:LNCaP clone FGC
2023	1.28256	1.25526	0.0272958	0.703072	0.695552	0.00752032	0.0625339	0.474792	0.101538	0.798654	0.502793	ENCFF610ZRX	CHIP:H3K18ac:neural stem progenitor cell originated from H1-hESC
3869	4.80794	4.53075	0.277194	1.14561	1.1343	0.0113082	0.0625919	0.474792	0.289586	0.968263	0.502792	ENCFF639NFJ	CHIP:H3K36me3:CD8-positive, alpha-beta T cell male adult (37 years)
806	3.32905	3.31775	0.0113051	0.959053	0.950551	0.0085023	0.0626768	0.474792	0.158883	0.867001	0.502791	ENCFF656QVF	CHIP:H3K9ac:astrocyte
3918	2.22975	2.18099	0.0487547	0.922535	0.914713	0.00782204	0.0627337	0.474792	0.22701	0.925635	0.50279	ENCFF677GHO	CHIP:H3K27me3:CD8-positive, alpha-beta T cell
1298	0.738011	0.727395	0.0106154	0.420319	0.41401	0.00630891	0.0629575	0.475808	0.326185	0.986632	0.502787	ENCFF495UJE	CHIP:MAZ:HepG2
5222	0.491243	0.460853	0.0303902	0.237266	0.227386	0.00987987	0.0635966	0.47976	0.216546	0.917002	0.502777	CNhs13437	CAGE:cerebrospinal fluid,
4815	0.809487	0.755337	0.0541502	0.281239	0.269982	0.011256	0.063661	0.47976	0.0198757	0.501415	0.502776	CNhs11087	CAGE:Smooth Muscle Cells - Carotid,
5111	1.63255	1.44743	0.185117	0.50388	0.490917	0.0129634	0.06389	0.480804	0.127811	0.821729	0.502773	CNhs12336	CAGE:chronic myelogenous leukemia cell line:K562 ENCODE, biol_
3522	2.57347	2.54368	0.029788	0.898494	0.890779	0.00771523	0.0640872	0.481235	0.229825	0.92645	0.50277	ENCFF440QGE	CHIP:H3K4me2:IMR-90
4231	1.28366	1.27818	0.005481	0.486796	0.481966	0.00482979	0.0642299	0.481235	0.318644	0.979888	0.502768	ENCFF949COK	CHIP:H3K4me3:sigmoid colon female adult (53 years)
4981	0.125897	0.118501	0.00739656	0.0825745	0.0787195	0.00385494	0.0642499	0.481235	0.213261	0.915932	0.502768	CNhs11797	CAGE:brain, fetal, pool1
1761	1.06323	1.0582	0.00503385	0.531882	0.523232	0.00865024	0.0643096	0.481235	0.401978	0.999772	0.502767	ENCFF360BPK	CHIP:H3K27me3:iPS DF 19.11 male newborn
2170	5.63309	5.5453	0.0877929	1.17839	1.16933	0.00905323	0.0645062	0.482027	0.388343	0.999772	0.502764	ENCFF905FLR	CHIP:H3K27ac:liver male adult (31 year)
4809	1.12586	1.0296	0.0962589	0.366531	0.352163	0.0143678	0.0646066	0.482099	0.0913074	0.792747	0.502763	CNhs11386	CAGE:Placental Epithelial Cells,
699	4.11451	3.89652	0.217991	1.19007	1.17964	0.0104284	0.064949	0.483043	0.138216	0.837941	0.502758	ENCFF954JHK	CHIP:H3K36me3:K562
4125	2.81021	2.73132	0.0788891	1.04687	1.03724	0.00963449	0.0649859	0.483043	0.0511203	0.675628	0.502757	ENCFF470FUY	CHIP:H3K27me3:peripheral blood mononuclear cell male adult (32 years)
5154	1.17992	1.05765	0.122263	0.459682	0.4482	0.0114816	0.0650058	0.483043	0.161296	0.867551	0.502757	CNhs12805	CAGE:medulloblastoma cell line:D283 Med
4977	0.0609789	0.0565184	0.00446055	0.0435116	0.0404691	0.00304253	0.065298	0.484142	0.123205	0.81195	0.502753	CNhs11793	CAGE:adrenal gland, adult, pool1
1694	1.92235	1.81199	0.110354	0.752702	0.74411	0.00859159	0.0653662	0.484142	0.369011	0.999772	0.502752	ENCFF288IVG	CHIP:H3K36me3:right lobe of liver female adult (53 years)
4762	1.33669	1.26549	0.0711954	0.432802	0.424126	0.00867531	0.065427	0.484142	0.203807	0.912198	0.502751	CNhs12196	CAGE:Dendritic Cells - plasmacytoid,
3312	5.83775	5.57458	0.263165	1.29566	1.28059	0.0150669	0.06596	0.487309	0.400708	0.999772	0.502743	ENCFF020ZHY	CHIP:H3K27ac:cingulate gyrus female adult (75 years)
1221	3.06141	2.99834	0.0630682	0.702978	0.694099	0.00887847	0.0660488	0.487309	0.229507	0.92645	0.502742	ENCFF721SBI	CHIP:H3K4me3:keratinocyte female
3674	4.55443	4.29663	0.257792	1.00809	0.998383	0.00970989	0.0661302	0.487309	0.148864	0.858764	0.502741	ENCFF748YAH	CHIP:H3K27ac:KOPT-K1
3161	1.55864	1.51528	0.0433619	0.700653	0.690429	0.0102244	0.0666807	0.490685	0.160765	0.867551	0.502733	ENCFF587FTV	CHIP:AGO1:HepG2
3264	6.79711	6.74341	0.0536966	1.29805	1.2913	0.00675464	0.0669267	0.491037	0.033755	0.596108	0.50273	ENCFF897XDW	CHIP:H3K4me1:neutrophil male
2892	1.28795	1.28419	0.00375545	0.625412	0.620404	0.00500786	0.0670928	0.491037	0.0613612	0.707664	0.502727	ENCFF423FWZ	CHIP:CTCF:tibial nerve female adult (53 years)
4834	0.92742	0.846913	0.080507	0.387979	0.379209	0.0087699	0.0670973	0.491037	0.28955	0.968263	0.502727	CNhs11256	CAGE:gall bladder carcinoma cell line:TGBC14TKB
2619	2.72338	2.6299	0.0934823	0.931202	0.923368	0.00783408	0.0670982	0.491037	0.29381	0.973973	0.502727	ENCFF649BYY	CHIP:H3K9ac:mucosa of stomach male adult (59 years)
483	0.414642	0.395956	0.0186854	0.237391	0.232164	0.00522611	0.0673982	0.491921	0.192834	0.903571	0.502723	ENCFF906KHN	DNASE:muscle of leg male embryo (127 days)
1199	2.34447	2.35159	-0.00712132	0.604144	0.597865	0.00627959	0.0674042	0.491921	0.190362	0.901465	0.502723	ENCFF354SQM	CHIP:H3K4me3:kidney epithelial cell
3062	6.02883	5.68823	0.340593	1.269	1.25796	0.0110376	0.0678041	0.493974	0.153872	0.861211	0.502717	ENCFF448GRO	CHIP:H3K36me3:natural killer cell male adult (21 year)
276	0.39697	0.378178	0.0187922	0.231569	0.225995	0.00557424	0.0682431	0.493974	0.24938	0.935043	0.502711	ENCFF484VHZ	DNASE:muscle of trunk female embryo (120 days)
2943	2.07934	2.0348	0.0445344	0.88075	0.873043	0.00770646	0.0682664	0.493974	0.391935	0.999772	0.502711	ENCFF079DVI	CHIP:H3K27me3:naive thymus-derived CD4-positive, alpha-beta T cell
1126	2.46168	2.44004	0.021631	0.668857	0.658283	0.0105749	0.068368	0.493974	0.257744	0.941559	0.50271	ENCFF109LUV	CHIP:H3K4me3:Caco-2
1302	0.766998	0.753301	0.0136971	0.437205	0.430188	0.00701749	0.0683772	0.493974	0.244278	0.928942	0.50271	ENCFF016QMU	CHIP:MAX:HepG2
1194	3.67387	3.59877	0.0751011	0.787888	0.776784	0.0111035	0.0685696	0.493974	0.186252	0.895124	0.502707	ENCFF104DXZ	CHIP:H3K4me3:fibroblast of pulmonary artery
4036	5.70989	5.53697	0.172922	1.1739	1.16441	0.00949216	0.0686056	0.493974	0.410784	0.999772	0.502706	ENCFF859ITG	CHIP:H3K27ac:Peyer's patch female adult (53 years)
2921	5.474	5.29051	0.183489	1.23019	1.2196	0.0105889	0.0686082	0.493974	0.398929	0.999772	0.502706	ENCFF015BTM	CHIP:H3K4me1:thymus female embryo (110 days)
44	0.200128	0.194523	0.00560544	0.157528	0.154113	0.00341466	0.0686172	0.493974	0.215229	0.916533	0.502706	ENCFF927VUO	DNASE:psoas muscle male adult (27 years) and male adult (35 years)
2282	6.58699	6.25049	0.336496	1.43793	1.425	0.0129373	0.068713	0.493974	0.313204	0.977813	0.502705	ENCFF124PPH	CHIP:H3K36me3:common myeloid progenitor, CD34-positive male adult (36 years)
1922	1.49004	1.39704	0.0929998	0.641223	0.63338	0.00784314	0.0688357	0.493974	0.359081	0.998964	0.502703	ENCFF106GWO	CHIP:H3K36me3:sigmoid colon female adult (53 years)
5217	2.99966	2.82025	0.179411	0.702375	0.692431	0.00994307	0.0689293	0.493974	0.124469	0.814376	0.502702	CNhs13224	CAGE:CD14+CD16- Monocytes,
619	0.218749	0.209349	0.00940047	0.154709	0.149371	0.00533716	0.0690216	0.493974	0.347883	0.995243	0.502701	ENCFF370CZR	DNASE:spinal cord female embryo (59 days) and male embryo (72 days)
4831	0.923344	0.832228	0.0911158	0.350172	0.34147	0.00870192	0.0690601	0.493974	0.0737155	0.728569	0.5027	CNhs11253	CAGE:acute lymphoblastic leukemia (T-ALL) cell line:Jurkat
5258	0.302455	0.279281	0.0231735	0.161347	0.15415	0.00719661	0.0692889	0.493974	0.248529	0.933828	0.502697	CNhs13793	CAGE:amygdala - adult,
5257	1.1769	1.04925	0.127642	0.411378	0.399535	0.0118424	0.0693818	0.493974	0.213587	0.915932	0.502696	CNhs13553	CAGE:CD34 cells differentiated to erythrocyte lineage, biol_
5089	0.336533	0.316635	0.0198983	0.146076	0.140407	0.00566941	0.0694926	0.493974	0.0578013	0.702255	0.502694	CNhs12193	CAGE:non-small cell lung cancer cell line:NCI-H1385
4887	1.03052	0.95767	0.0728504	0.342572	0.329459	0.0131128	0.0695406	0.493974	0.0429324	0.646623	0.502694	CNhs12123	CAGE:Corneal Epithelial Cells,
1759	8.5216	7.99269	0.528915	1.56722	1.55474	0.0124832	0.0696803	0.493974	0.18124	0.89368	0.502692	ENCFF369UBB	CHIP:H3K36me3:mesodermal cell originated from HUES64
3154	0.566665	0.558363	0.00830197	0.323064	0.319092	0.00397187	0.0697173	0.493974	0.202637	0.912198	0.502691	ENCFF242BVN	CHIP:H3K4me3:body of pancreas male adult (54 years)
4162	1.83262	1.75294	0.0796716	0.616481	0.606827	0.0096541	0.0698185	0.493974	0.24478	0.928942	0.50269	ENCFF063ITE	CHIP:H3K4me3:Peyer's patch female adult (53 years)
2135	6.17466	6.02649	0.14817	1.34143	1.32884	0.0125947	0.069821	0.493974	0.478179	0.999772	0.50269	ENCFF250ASJ	CHIP:H3K27me3:adrenal gland male embryo (97 days)
1971	0.61624	0.609254	0.00698608	0.430228	0.427945	0.00228214	0.0699165	0.493974	0.144662	0.845533	0.502688	ENCFF323SGW	CHIP:H3K4me3:CD8-positive, alpha-beta T cell male adult (28 years)
5102	1.77261	1.65688	0.115733	0.637843	0.622879	0.0149637	0.0700752	0.493974	0.189313	0.901457	0.502686	CNhs12319	CAGE:globus pallidus, adult,
2392	2.25194	2.18988	0.0620666	0.619884	0.613996	0.00588739	0.0700806	0.493974	0.180306	0.89368	0.502686	ENCFF584VBB	CHIP:H3K4me3:thymus female embryo (110 days)
2535	2.36765	2.43563	-0.0679798	0.6512	0.643936	0.00726396	0.0701029	0.493974	0.162813	0.868863	0.502686	ENCFF729NDF	CHIP:H3K4me3:neural stem progenitor cell originated from H9
5263	0.210794	0.196143	0.0146511	0.122543	0.117119	0.00542465	0.0704672	0.494653	0.26116	0.945159	0.502681	CNhs13798	CAGE:occipital cortex - adult,
4235	4.97434	4.76965	0.204686	1.33408	1.31988	0.014203	0.0705634	0.494653	0.40081	0.999772	0.50268	ENCFF407AKM	CHIP:H3K4me1:temporal lobe male adult (81 year)
4139	0.801635	0.782052	0.0195827	0.516005	0.507953	0.00805211	0.0706353	0.494653	0.313344	0.977813	0.502679	ENCFF332CBV	CHIP:PCBP1:HepG2
5210	1.89093	1.73964	0.151292	0.565173	0.554231	0.0109423	0.0706618	0.494653	0.031549	0.593363	0.502678	CNhs13813	CAGE:CD4+CD25-CD45RA+ naive conventional T cells expanded,
5278	1.96846	1.80164	0.16682	0.620591	0.605971	0.0146199	0.0706743	0.494653	0.322044	0.982726	0.502678	CNhs13975	CAGE:adipose,
4922	0.760603	0.68921	0.0713931	0.310233	0.300485	0.00974825	0.0707578	0.494653	0.178584	0.891744	0.502677	CNhs11726	CAGE:testicular germ cell embryonal carcinoma cell line:NEC8
4947	0.860055	0.789198	0.0708572	0.348111	0.335141	0.0129697	0.0708938	0.494953	0.275256	0.955841	0.502675	CNhs11757	CAGE:heart, adult, diseased post-infarction,
4841	0.756735	0.688831	0.0679042	0.304003	0.293509	0.0104935	0.0711282	0.495678	0.0416017	0.641389	0.502672	CNhs11264	CAGE:mesothelioma cell line:ACC-MESO-4
5228	0.266582	0.254634	0.011948	0.170035	0.162202	0.00783291	0.0712254	0.495678	0.062951	0.707664	0.502671	CNhs13444	CAGE:eye - muscle inferior rectus,
2000	5.47895	5.33174	0.147209	1.14961	1.13924	0.0103716	0.0712776	0.495678	0.0846209	0.774351	0.50267	ENCFF638VOA	CHIP:H3K27ac:colonic mucosa female adult (56 years)
3451	0.923555	0.916586	0.00696909	0.606029	0.600459	0.00557011	0.0716545	0.497173	0.292778	0.972205	0.502665	ENCFF837UHE	CHIP:H2BK5ac:neural stem progenitor cell originated from H1-hESC
1831	2.08696	2.10686	-0.0198951	0.761175	0.756493	0.00468183	0.071763	0.497173	0.325718	0.986625	0.502664	ENCFF192FUE	CHIP:H3K9ac:SK-N-SH
861	1.27967	1.27891	0.000762701	0.674637	0.668148	0.00648898	0.0717766	0.497173	0.208535	0.915932	0.502663	ENCFF948IYF	CHIP:HDAC2:H1-hESC
533	0.423645	0.421244	0.00240058	0.236371	0.233382	0.00298904	0.0718694	0.497173	0.201977	0.912198	0.502662	ENCFF594UFP	DNASE:mesenchymal stem cell originated from H1-hESC
4779	1.00481	0.90914	0.0956662	0.36675	0.354549	0.0122008	0.0719916	0.497173	0.228902	0.92645	0.502661	CNhs10875	CAGE:Intestinal epithelial cells (polarized),
2222	0.304678	0.299066	0.00561225	0.258099	0.255725	0.00237414	0.0720541	0.497173	0.273062	0.951616	0.50266	ENCFF839QLL	CHIP:ZFX:22Rv1
5082	1.37843	1.29467	0.0837561	0.410114	0.401789	0.00832587	0.072295	0.498188	0.194071	0.903571	0.502657	CNhs12182	CAGE:CD8+ T Cells (pluriselect), , donation1
228	0.303801	0.293102	0.0106985	0.197379	0.194311	0.00306894	0.0725426	0.499202	0.192852	0.903571	0.502653	ENCFF319GAX	DNASE:renal pelvis female embryo (96 days)
2262	4.28579	4.11868	0.167114	1.24638	1.23372	0.0126539	0.0726753	0.499202	0.465907	0.999772	0.502652	ENCFF379KCI	CHIP:H3K4me1:angular gyrus male adult (81 year)
2045	3.27071	3.13012	0.140584	0.991102	0.98231	0.00879252	0.0727239	0.499202	0.184518	0.894401	0.502651	ENCFF218PDV	CHIP:H3K9ac:duodenal mucosa male adult (59 years)
2294	4.21041	4.16244	0.0479727	1.19291	1.18147	0.0114424	0.0728727	0.499578	0.373667	0.999772	0.502649	ENCFF711TRT	CHIP:H3K27me3:endodermal cell originated from HUES64
1151	4.09715	4.01881	0.0783396	1.11511	1.10414	0.0109763	0.0730114	0.499883	0.471982	0.999772	0.502647	ENCFF055WTJ	CHIP:H3K27me3:cardiac mesoderm
3226	3.45672	3.46444	-0.00772047	0.827846	0.816244	0.0116028	0.0735757	0.502236	0.526848	0.999772	0.50264	ENCFF988XYF	CHIP:H3K4me3:germinal matrix male embryo (20 weeks)
285	0.190954	0.18804	0.00291374	0.152486	0.15004	0.00244555	0.0736356	0.502236	0.151966	0.860153	0.502639	ENCFF037ZSW	DNASE:omental fat pad female adult (51 year)
1173	3.00554	2.95525	0.0502894	0.732783	0.725516	0.00726634	0.0736386	0.502236	0.510531	0.999772	0.502639	ENCFF176SFX	CHIP:H3K4me3:HCT116
421	0.288235	0.275415	0.0128194	0.189168	0.183153	0.00601467	0.073875	0.502832	0.18633	0.895124	0.502636	ENCFF482UKP	DNASE:brain embryo (80 days)
4742	1.15396	1.03788	0.116081	0.389547	0.377857	0.0116901	0.0740565	0.502832	0.169055	0.878486	0.502634	CNhs10750	CAGE:bile duct carcinoma cell line:HuCCT1
1935	1.21535	1.1954	0.0199556	0.666016	0.657853	0.00816345	0.0741665	0.502832	0.399922	0.999772	0.502632	ENCFF133PYQ	CHIP:PTBP1:HepG2
3038	3.34158	3.2687	0.0728846	1.17241	1.16158	0.0108254	0.0743367	0.502832	0.371015	0.999772	0.50263	ENCFF259GQW	CHIP:H3K27me3:placenta embryo (16 weeks)
2917	4.1849	4.0083	0.176597	1.22465	1.21132	0.0133282	0.0743756	0.502832	0.394232	0.999772	0.502629	ENCFF639TZJ	CHIP:H3K4me1:temporal lobe female adult (75 years)
2819	5.01406	4.79767	0.216387	1.32141	1.30745	0.0139552	0.0744125	0.502832	0.505689	0.999772	0.502629	ENCFF996JSH	CHIP:H3K4me1:cingulate gyrus male adult (81 year)
819	9.90306	9.32327	0.579789	1.48516	1.47194	0.0132221	0.0744791	0.502832	0.280148	0.959479	0.502628	ENCFF981RED	CHIP:H3K36me3:CD14-positive monocyte female
1822	4.1191	3.94541	0.173688	1.21558	1.20222	0.0133518	0.0744832	0.502832	0.453838	0.999772	0.502628	ENCFF885FVT	CHIP:H3K4me1:cingulate gyrus female adult (75 years)
3843	7.02951	6.62878	0.400728	1.36382	1.35182	0.0119966	0.0748291	0.503812	0.252754	0.936604	0.502624	ENCFF235QUM	CHIP:H3K36me3:CD4-positive, alpha-beta T cell male adult (37 years)
87	0.43622	0.434353	0.00186706	0.246743	0.244249	0.00249356	0.0748331	0.503812	0.310425	0.977813	0.502623	ENCFF021NBR	DNASE:choroid plexus epithelial cell
4050	0.691199	0.67645	0.0147496	0.448835	0.440215	0.00862035	0.0749127	0.503812	0.0704647	0.71583	0.502622	ENCFF616DFJ	CHIP:EP300:neural cell originated from H1-hESC
1450	2.40671	2.34205	0.0646536	0.794364	0.787584	0.00678039	0.0753313	0.505962	0.197575	0.908844	0.502617	ENCFF034RXK	CHIP:H3K27ac:stomach male adult (34 years)
729	2.65805	2.64989	0.00816321	0.777939	0.766925	0.0110145	0.0754229	0.505962	0.183283	0.89368	0.502616	ENCFF363RJQ	CHIP:H3K4me3:skeletal muscle myoblast male adult (22 years)
3260	3.53292	3.4194	0.11352	0.98413	0.975719	0.00841087	0.0760154	0.509294	0.261633	0.945159	0.502608	ENCFF309YBQ	CHIP:H3K9ac:mucosa of rectum female adult (61 year)
2553	1.32452	1.29842	0.0260978	0.519487	0.515207	0.00427997	0.0762425	0.510172	0.18609	0.895124	0.502605	ENCFF039PUD	CHIP:H3K4me3:MM.1S
4893	0.556829	0.518774	0.0380556	0.213402	0.203517	0.00988479	0.0763775	0.510432	0.0325887	0.596108	0.502604	CNhs12922	CAGE:Mesenchymal Stem Cells - adipose,
5176	0.954051	0.882153	0.0718988	0.392633	0.380161	0.0124728	0.0766468	0.511138	0.265868	0.949061	0.5026	CNhs12855	CAGE:heart - mitral valve, adult
1719	1.76703	1.73932	0.0277103	0.572701	0.56538	0.00732154	0.0767622	0.511138	0.203079	0.912198	0.502599	ENCFF721URL	CHIP:H3K4me3:IMR-90
4787	2.45511	2.25495	0.200158	0.650596	0.63567	0.0149265	0.0767716	0.511138	0.462909	0.999772	0.502599	CNhs10884	CAGE:Small Airway Epithelial Cells,
5132	0.132993	0.128343	0.00465067	0.0786654	0.0748993	0.0037661	0.076897	0.511332	0.0342396	0.597876	0.502597	CNhs12518	CAGE:common myeloid progenitor CMP,
42	0.143658	0.144737	-0.00107841	0.121836	0.120647	0.00118876	0.0771097	0.511497	0.141802	0.842084	0.502594	ENCFF690MIA	DNASE:keratinocyte female
1150	2.76628	2.76697	-0.000694036	0.93805	0.929997	0.00805289	0.0771226	0.511497	0.161602	0.867551	0.502594	ENCFF054IIB	CHIP:H3K27me3:cardiac mesoderm
5239	3.78551	3.67142	0.114086	0.757994	0.748976	0.00901872	0.0772107	0.511497	0.100237	0.798654	0.502593	CNhs13532	CAGE:CD14+ monocytes - treated with Group A streptococci,
767	4.32088	4.25238	0.0685005	1.09213	1.08264	0.00948381	0.0774541	0.511689	0.483544	0.999772	0.50259	ENCFF559URT	CHIP:H3K4me2:osteoblast
3691	3.5308	3.4851	0.0456984	1.1368	1.12785	0.00895572	0.0774796	0.511689	0.161444	0.867551	0.50259	ENCFF201TMB	CHIP:H3K27me3:PC-9
95	0.378589	0.384978	-0.00638911	0.230824	0.229578	0.00124614	0.0775402	0.511689	0.372313	0.999772	0.502589	ENCFF390MSL	DNASE:iris pigment epithelial cell
3370	4.93942	4.68223	0.257193	1.29989	1.28911	0.0107826	0.077639	0.511689	0.221043	0.922833	0.502588	ENCFF090HJP	CHIP:H3K36me3:foreskin fibroblast male newborn
1866	3.79096	3.79787	-0.00691152	0.896322	0.885138	0.0111837	0.0777397	0.511689	0.350947	0.995506	0.502587	ENCFF384DPM	CHIP:H3K4me3:neurosphere female embryo (17 weeks) originated from ganglionic eminence
5166	0.529523	0.493758	0.0357645	0.256986	0.24556	0.011426	0.0778176	0.511689	0.0584197	0.705418	0.502586	CNhs12845	CAGE:bone marrow, adult
440	0.380629	0.363621	0.0170082	0.227815	0.224212	0.00360325	0.0779291	0.511789	0.109874	0.798654	0.502584	ENCFF925SLC	DNASE:left kidney male embryo (115 days)
2782	1.38697	1.38552	0.00145602	0.645283	0.640037	0.00524521	0.0781321	0.511954	0.20221	0.912198	0.502582	ENCFF725SHA	CHIP:CTCF:tibial nerve male adult (37 years)
5104	1.95974	1.846	0.113737	0.664928	0.650125	0.0148033	0.0781469	0.511954	0.203264	0.912198	0.502581	CNhs12321	CAGE:caudate nucleus, adult,
2054	1.05197	1.04585	0.00611567	0.462235	0.459113	0.0031223	0.0783608	0.512442	0.340866	0.995067	0.502579	ENCFF837UAW	CHIP:H3K4me3:placental basal plate female embryo (40 weeks)
5261	0.340818	0.317132	0.0236853	0.179985	0.172782	0.00720225	0.0784143	0.512442	0.0646722	0.707664	0.502578	CNhs13796	CAGE:medial frontal gyrus - adult,
2254	0.771312	0.757038	0.0142746	0.534606	0.527822	0.00678372	0.0785235	0.512525	0.484252	0.999772	0.502577	ENCFF710LDA	CHIP:H4K91ac:neural stem progenitor cell originated from H1-hESC
450	0.31249	0.300376	0.0121144	0.200058	0.195397	0.00466174	0.078672	0.512864	0.159921	0.867001	0.502575	ENCFF616AAF	DNASE:tongue male embryo (72 days)
4821	0.714743	0.660038	0.0547059	0.280199	0.270652	0.00954705	0.0787781	0.512926	0.0272371	0.556579	0.502574	CNhs11100	CAGE:ductal cell carcinoma cell line:KLM-1
1192	3.55405	3.47575	0.0782998	0.805556	0.795538	0.0100182	0.0790177	0.513857	0.284109	0.961173	0.502571	ENCFF024BEV	CHIP:H3K4me3:fibroblast of mammary gland female
5109	3.23077	2.90766	0.323105	0.788865	0.772652	0.0162131	0.0791554	0.514057	0.258429	0.942371	0.502569	CNhs12328	CAGE:hepatocellular carcinoma cell line: HepG2 ENCODE, biol_
5293	0.380448	0.356993	0.0234549	0.191901	0.184518	0.0073832	0.0792419	0.514057	0.215474	0.916533	0.502568	CNhs14084	CAGE:thalamus, newborn,
3420	3.7602	3.60178	0.158421	1.14986	1.1367	0.0131619	0.0798973	0.517676	0.249267	0.935043	0.50256	ENCFF183CWI	CHIP:H3K4me1:layer of hippocampus female adult (75 years)
3139	4.19672	4.16861	0.0281091	1.23492	1.22575	0.00917196	0.0801123	0.51798	0.363922	0.999671	0.502557	ENCFF380EUR	CHIP:H3K27me3:neural stem progenitor cell originated from H9
1861	1.03093	1.0228	0.00813746	0.523875	0.521183	0.00269192	0.0801392	0.51798	0.390401	0.999772	0.502557	ENCFF710OZO	CHIP:H3K4me3:stomach male adult (34 years)
5107	1.55213	1.46214	0.0899867	0.561279	0.548143	0.0131364	0.0803172	0.518359	0.136175	0.834482	0.502555	CNhs13912	CAGE:putamen, adult,
4015	0.737134	0.717987	0.0191472	0.446594	0.44068	0.005914	0.0804435	0.518359	0.107574	0.798654	0.502553	ENCFF495TLF	CHIP:H3K9me3:brain male embryo (122 days)
4912	1.0202	0.93723	0.0829709	0.402957	0.388092	0.0148651	0.0804905	0.518359	0.0703359	0.71583	0.502553	CNhs11680	CAGE:lung, fetal,
632	0.448375	0.430631	0.0177436	0.245641	0.24192	0.003721	0.0808991	0.520359	0.0610303	0.707664	0.502548	ENCFF106TCU	DNASE:left lung male embryo (115 days)
5183	0.433747	0.392803	0.0409439	0.191131	0.18468	0.00645109	0.0810315	0.520568	0.272254	0.951616	0.502546	CNhs13050	CAGE:acute myeloid leukemia (FAB M5) cell line:NOMO-1
1844	2.34378	2.31224	0.0315309	0.782296	0.770324	0.0119714	0.0811275	0.520568	0.148598	0.858764	0.502545	ENCFF688DBU	CHIP:H3K27ac:neural cell
5110	3.20843	2.97591	0.232519	0.788627	0.781111	0.00751561	0.0820993	0.526168	0.168062	0.878486	0.502533	CNhs12333	CAGE:B lymphoblastoid cell line: GM12878 ENCODE, biol_
4208	0.595949	0.575399	0.0205505	0.405874	0.396403	0.00947097	0.0825653	0.528518	0.0614043	0.707664	0.502528	ENCFF248CKW	CHIP:EZH2phosphoT487:MM.1S
5135	0.139022	0.137855	0.00116701	0.0815712	0.0777747	0.00379645	0.082679	0.528608	0.537947	0.999772	0.502526	CNhs12530	CAGE:neutrophil PMN,
482	0.269829	0.258614	0.0112148	0.181856	0.175765	0.0060906	0.0828378	0.528987	0.256416	0.940652	0.502524	ENCFF113RRS	DNASE:retina embryo (74 days) and embryo (85 days)
791	2.75939	2.68455	0.0748422	0.719241	0.710584	0.00865692	0.0830298	0.529343	0.351356	0.996133	0.502522	ENCFF791ZHJ	CHIP:H3K4me3:DND-41
2519	0.527419	0.530061	-0.00264215	0.370749	0.371593	-0.000844359	0.0830928	0.529343	0.121255	0.811862	0.502521	ENCFF882NIX	CHIP:GABPA:liver female child (4 years)
4158	5.69967	5.36695	0.33272	1.21637	1.20495	0.0114204	0.0833756	0.530227	0.35345	0.997572	0.502518	ENCFF215CDE	CHIP:H3K36me3:CD4-positive, alpha-beta T cell treated with phorbol 13-acetate 12-myristate , ionomycin
[truncated: 4,478 more rows]

## Sheet: Zhou mouse
	pro_mean	sib_mean	diff_mean	pro_geo	sib_geo	diff_geo	mw_p	mw_q	ks_p	ks_q	auroc	target_id	target_labels
[truncated: 1,643 more rows]

[truncated: 1 more sheets: Zhou human]
